# Supplementary material for: Analysis of coastal cod (Gadus morhua L.) sampled on spawning sites reveals a genetic gradient throughout Norway’s coastline
Source: BMC Genet. 2018 Jul 9;19:42. doi: 10.1186/s12863-018-0625-8 (PMC6036686; doi:10.1186/s12863-018-0625-8)
Supplement: Supplementary file 2 — Table S1. Genetic differentiation at Dataset 1 (66 samples genotyped at 6 microsatellite markers): Pairwise FST are shown in the lower diagonal whereas P-values computed after 10,000 permutations are shown in the lower diagonal. (XLSX 77 kb) [file 12863_2018_625_MOESM2_ESM.xlsx]

## Sheet: Table S3. Legend
Table S1. Genetic differentiation at Dataset 1 (66 samples genotyped at 6 microsatellite markers): Pairwise FST are shown in the lower diagonal whereas P-values computed after 10000 permutations are shown in the lower diagonal. P-values depicted in red were significantly different from zero and significant FST values (P<0.05) were highlighted in cells shaded in grey to ease reading. Purple colour…

## Sheet: Pairwise FST matrix
		Finnmark				Troms							Lofoten											Helgeland													Møre										Vestlandet
Region		Magerøysundet_2002	Smørfjord_2002	Smørfjord_2003	Repparfjord_2003	Balsfjord_2002	Balsfjord_2003	Tranøybotn_2004	Tranøybotn_2005	Gratangen_2004	Gratangen_2005	Gratangen_2006	Eidsfjord_2003	Eidsfjord_2004	Valberg_2006	Henningsværstraumen_2006	Austnesfjord_2002	Bresja_2006	Kanstadfjord_2006	Fiskerfjord_Tjeldsund_2006	Stefjord_2002	Tysfjord_2003	Baldkjosen_Nordfolda_2004	Hopen_2005	Saltenfjord_Hopen_2004	Skjerstadfjord_Valnesfjord_2005	Skjerstadfjord_Valnesfjord_2006	Glomfjord_Ørnes_2004	LilleSjona_2004	LilleSjona_2005	Vega_2002	Vega_2003	Langesundet_2004	Vikna_2003	Verrabotn_2005	Verrabotn_2006	Frøya_2004	Hitra_Laksovik_2004	Smøla_2003	Vinjefjord_2004	Batnesfjord_2004	Buagrunn_2004	Midsund_2004	Godøy_2004	Borgunfjord_2004	Borgunfjord_2005	NV_Bømlo_2006	Nærøysund_2007	Byrknesøy_Gulen_2007
Finnmark	Magerøysundet_2002	*	0.0989	0.47124	0.00119	0.00099	0.129	0.00079	0.00069	0.07108	0.27354	0.02426	0.0001	0.0002	0.00267	0	0	0	0	0.0001	0.0001	0.00178	0	0.0005	0.00634	0.0001	0.03208	0.01772	0.0005	0.00594	0.00099	0.00485	0	0	0	0.00822	0	0	0	0	0	0	0	0	0	0	0	0	0
	Smørfjord_2002	0.00367	*	0.5843	0.20533	0.35858	0.73191	0.49441	0.48817	0.46619	0.73191	0.3074	0.04158	0.7029	0.77388	0.0001	0.49352	0.0888	0.00149	0.19295	0.15375	0.3366	0.02178	0.05613	0.32482	0.11425	0.93555	0.6035	0.32819	0.25047	0.0694	0.38363	0.00614	0.00139	0.00881	0.04	0.0001	0.0001	0	0	0	0.09039	0	0.14751	0	0.0001	0	0	0.0001
	Smørfjord_2003	0.0003	0	*	0.05405	0.44124	0.66884	0.0987	0.03267	0.33442	0.62321	0.01594	0.00604	0.00931	0.11464	0	0.01218	0.00099	0	0.03901	0.02069	0.10177	0.00228	0.00515	0.16187	0.00406	0.27829	0.07583	0.08405	0.16177	0.00683	0.13712	0	0	0.0005	0.03485	0	0	0	0	0	0.00109	0	0.0001	0	0	0	0	0
	Repparfjord_2003	0.01004	0.00256	0.00418	*	0.45807	0.18147	0.14682	0.21958	0.53549	0.653	0.12385	0.17553	0.27146	0.12603	0.05425	0.28809	0.15395	0.0095	0.17493	0.44303	0.60083	0.18355	0.57074	0.58707	0.43085	0.90031	0.16919	0.08098	0.44639	0.45995	0.7132	0.05405	0.03812	0.24206	0.11266	0.00149	0.0002	0	0.00089	0.0005	0.40818	0.0004	0.41976	0.0004	0.0298	0	0	0.0001
Troms	Balsfjord_2002	0.00718	0.001	0.00038	0.00046	*	0.7232	0.28888	0.56024	0.2676	0.35115	0.04415	0.07267	0.23245	0.2475	0.0002	0.07673	0.03752	0.0001	0.17969	0.06188	0.48985	0.03109	0.05861	0.25394	0.11425	0.75933	0.20048	0.20661	0.30809	0.06722	0.48748	0.00069	0.00109	0.00149	0.0103	0	0	0	0	0	0.07722	0	0.01792	0	0	0	0	0
	Balsfjord_2003	0.00234	0	0	0.00202	0	*	0.12781	0.47342	0.45005	0.75646	0.0689	0.01287	0.12474	0.14256	0	0.00644	0.00277	0.0001	0.09286	0.05821	0.13365	0.01742	0.05574	0.27799	0.0598	0.5545	0.05841	0.07762	0.10484	0.03524	0.47104	0.00297	0.00396	0.00168	0.00485	0	0	0	0	0.0001	0.01733	0	0.0101	0	0	0	0	0
	Tranøybotn_2004	0.00655	0.00016	0.00215	0.0021	0.00081	0.00165	*	0.49975	0.53985	0.70607	0.14434	0.00436	0.59628	0.32571	0.0002	0.09999	0.02782	0	0.13702	0.05178	0.4159	0.05227	0.02643	0.11642	0.23146	0.95624	0.40105	0.05	0.71557	0.07039	0.27403	0.00208	0.00178	0.0001	0.05148	0	0	0	0.0001	0	0.06643	0	0.03782	0	0.0001	0	0	0
	Tranøybotn_2005	0.0091	0.0005	0.00426	0.0021	0	0.00021	0.0001	*	0.06722	0.57212	0.6537	0.33779	0.70052	0.7133	0.02366	0.21958	0.40897	0.10425	0.70389	0.09801	0.38966	0.24641	0.03544	0.51866	0.21671	0.74804	0.35234	0.49114	0.51559	0.03148	0.68914	0.3961	0.07277	0.00079	0.01129	0.00752	0.0001	0.0001	0.01931	0.00475	0.54519	0.00139	0.6238	0.0001	0.00871	0.00079	0	0.00158
	Gratangen_2004	0.00389	0.00048	0.00099	0	0.00138	0.00011	0	0.00382	*	0.59925	0.01564	0.0001	0.27482	0.02703	0	0.01317	0.00228	0	0.00653	0.23107	0.53193	0.04831	0.10197	0.05217	0.11246	0.63934	0.05643	0.00644	0.25087	0.0792	0.20552	0.00069	0.0004	0.01802	0.16315	0	0	0	0	0	0.04871	0	0.00416	0	0.0001	0	0	0
	Gratangen_2005	0.00143	0	0	0	0.0009	0	0	0	0	*	0.58895	0.11464	0.24265	0.24532	0.0002	0.2372	0.03059	0.0004	0.65766	0.5049	0.25661	0.23899	0.25968	0.89367	0.16642	0.93763	0.28166	0.17315	0.73042	0.01792	0.93674	0.00465	0.01871	0.00436	0.08544	0	0	0	0.0002	0	0.06831	0.0001	0.11781	0	0.00168	0	0	0
	Gratangen_2006	0.00537	0.00163	0.00546	0.00329	0.00375	0.00317	0.00198	0	0.00646	0	*	0.33353	0.5943	0.67429	0.01386	0.01158	0.07059	0.03158	0.40778	0.03079	0.07475	0.02188	0.12811	0.68429	0.18246	0.81982	0.297	0.34373	0.57677	0.0491	0.45253	0.03821	0.01247	0.00059	0.04623	0.0002	0	0	0.00198	0.00099	0.04495	0.0003	0.21325	0	0.00248	0.0001	0	0
Lofoten	Eidsfjord_2003	0.01326	0.00481	0.00609	0.00245	0.00301	0.0049	0.0054	0.0011	0.01048	0.00286	0.00125	*	0.04049	0.76072	0.33432	0.19295	0.66617	0.06118	0.70943	0.21958	0.09078	0.20206	0.07574	0.99554	0.05831	0.46292	0.15622	0.7528	0.26176	0.08564	0.31383	0.22572	0.09831	0.03534	0.00743	0.05465	0.01069	0	0.1283	0.07346	0.16503	0.0696	0.35155	0.01228	0.24532	0.00257	0.00416	0.00129
	Eidsfjord_2004	0.00949	0	0.00535	0.00135	0.00126	0.002	0	0	0.00118	0.00137	0	0.00363	*	0.43025	0.00228	0.09752	0.17959	0.13306	0.21018	0.17028	0.64647	0.08682	0.21592	0.39699	0.57816	0.92704	0.33007	0.22037	0.68092	0.41729	0.51282	0.168	0.11128	0.00584	0.06524	0.00881	0	0	0.0103	0.00119	0.46302	0.00089	0.45976	0.0005	0.00257	0.0001	0	0.0001
	Valberg_2006	0.01081	0	0.00361	0.00401	0.00198	0.0029	0.00102	0	0.00693	0.00219	0	0	0.00049	*	0.12197	0.33947	0.48847	0.16236	0.88031	0.14256	0.26443	0.39026	0.31235	0.90248	0.26987	0.60143	0.85209	0.85526	0.73458	0.25047	0.64538	0.6629	0.37877	0.03247	0.01208	0.08148	0.01663	0.00228	0.38283	0.06613	0.58351	0.00822	0.52896	0.12484	0.18117	0.01257	0.00871	0.01238
	Henningsværstraumen_2006	0.03299	0.01717	0.02202	0.0057	0.0125	0.01634	0.01098	0.00673	0.01985	0.01357	0.00816	0.00153	0.00821	0.00469	*	0.0296	0.69825	0.55658	0.21166	0.01119	0.02455	0.09554	0.07079	0.15256	0.04366	0.0203	0.03366	0.01772	0.0197	0.2675	0.00772	0.61964	0.57499	0.00723	0	0.79091	0.38184	0.09455	0.73745	0.65469	0.59192	0.8016	0.59549	0.83378	0.81239	0.39887	0.89991	0.39818
	Austnesfjord_2002	0.01596	0.00044	0.00667	0.0017	0.00354	0.00716	0.00289	0.00212	0.00711	0.00189	0.00723	0.00237	0.00313	0.00157	0.00698	*	0.75082	0.00743	0.18058	0.38867	0.81259	0.30472	0.01089	0.38214	0.07613	0.75824	0.11336	0.35739	0.09435	0.07989	0.44877	0.08118	0.01634	0.0399	0.03802	0.05524	0.00515	0.00079	0.05722	0.00198	0.61667	0.00416	0.43847	0.01406	0.02742	0.00366	0	0.00238
	Bresja_2006	0.02157	0.00491	0.01145	0.00343	0.00521	0.00912	0.00514	0.00093	0.0108	0.00585	0.00477	0	0.00231	0.00053	0	0	*	0.68508	0.71973	0.20968	0.45619	0.29423	0.01406	0.40234	0.12137	0.4253	0.2378	0.72824	0.08682	0.28789	0.13365	0.4847	0.26314	0.00356	0.00921	0.71825	0.337	0.16167	0.3365	0.53173	0.84071	0.26037	0.9705	0.37333	0.32512	0.07494	0.16592	0.06158
	Kanstadfjord_2006	0.02212	0.00923	0.01578	0.00662	0.00922	0.00924	0.00919	0.00283	0.01321	0.00878	0.00466	0.00355	0.00217	0.00301	0.00019	0.00723	0	*	0.26235	0.02534	0.08286	0.0889	0.04346	0.10326	0.01535	0.05584	0.03594	0.08207	0.01327	0.25512	0.01337	0.73547	0.49866	0.00069	0.0003	0.41323	0.09217	0.00673	0.44649	0.67667	0.6338	0.32096	0.53717	0.13286	0.15682	0.10553	0.19503	0.02099
	Fiskerfjord_Tjeldsund_2006	0.01387	0.00284	0.00483	0.00282	0.00226	0.00325	0.00236	0	0.00827	0	0.0009	0	0.00185	0	0.00281	0.00276	0	0.00193	*	0.35759	0.17276	0.52648	0.3364	0.96179	0.4157	0.5842	0.52579	0.32145	0.71399	0.10484	0.37006	0.35818	0.85615	0.00822	0.00287	0.10346	0.02495	0.00307	0.31868	0.49451	0.5441	0.13504	0.78824	0.16068	0.51391	0.05366	0.01733	0.00535
	Stefjord_2002	0.01336	0.00343	0.00583	0.0009	0.00386	0.00405	0.00381	0.00358	0.00221	0.00039	0.00594	0.00227	0.00227	0.00402	0.00907	0.00114	0.00301	0.00563	0.00137	*	0.89229	0.7521	0.1886	0.91001	0.59707	0.57351	0.1085	0.07583	0.11029	0.50134	0.45144	0.08405	0.06692	0.75517	0.26106	0.02099	0.01465	0.00089	0.03742	0.00238	0.39917	0.00842	0.14711	0.01554	0.2875	0.00139	0	0.00139
	Tysfjord_2003	0.01186	0.00187	0.00418	0	0.00033	0.00314	0.00043	0.00114	0	0.00216	0.0051	0.00464	0	0.00281	0.00868	0	0.00061	0.00476	0.00341	0	*	0.28443	0.0295	0.41392	0.60182	0.653	0.08682	0.14513	0.22552	0.55895	0.4457	0.08257	0.04415	0.17889	0.35442	0.03861	0.00168	0.00079	0.03406	0.00089	0.87051	0.00119	0.31145	0.00911	0.03564	0.01554	0.00119	0.00149
	Baldkjosen_Nordfolda_2004	0.01643	0.00567	0.00812	0.00231	0.004	0.00477	0.0031	0.00157	0.00422	0.00154	0.00527	0.00184	0.00274	0.00081	0.00373	0.0012	0.00138	0.0031	0	0	0.00163	*	0.27146	0.75398	0.40511	0.64885	0.23978	0.27621	0.36887	0.07079	0.69211	0.74785	0.18998	0.12029	0.00901	0.07059	0.14385	0.0005	0.76685	0.10098	0.63756	0.02534	0.23324	0.17295	0.76883	0.00832	0.0004	0.00109
Helgeland	Hopen_2005	0.01275	0.00555	0.00854	3e-05	0.00432	0.00431	0.00499	0.00572	0.00402	0.00207	0.00379	0.0043	0.00207	0.00215	0.00573	0.00827	0.00874	0.00539	0.00158	0.00334	0.00844	0.00178	*	0.57351	0.69142	0.57173	0.4457	0.02921	0.76923	0.63796	0.71726	0.15989	0.55024	0.48857	0.00931	0.00594	0.00069	0	0.01307	0.05009	0.06158	0.01148	0.08524	0.00416	0.12533	0	0.0001	0.0001
	Saltenfjord_Hopen_2004	0.0076	0.0017	0.00246	6e-05	0.00156	0.00132	0.0024	0.00039	0.00494	0	0	0	0.00067	0	0.00378	0.00118	0.00116	0.00336	0	0	0.00127	0	0.00018	*	0.63954	0.89585	0.7524	0.68241	0.78467	0.48797	0.98119	0.50441	0.38699	0.31838	0.14682	0.05999	0.00475	0.0001	0.09217	0.08049	0.4057	0.04584	0.69429	0.04732	0.54836	0.00267	0.00139	0.00495
	Skjerstadfjord_Valnesfjord_2005	0.01221	0.00299	0.00651	0.00065	0.00218	0.0029	0.00113	0.00166	0.00288	0.00212	0.0021	0.00337	0	0.00195	0.00542	0.00391	0.00335	0.00469	0.0007	0	0	0.00052	0	0	*	0.85427	0.45857	0.08484	0.4753	0.87902	0.63419	0.21255	0.15513	0.18048	0.09197	0.01139	0.00059	0	0.01525	0.00109	0.09266	0.00129	0.20097	0.00277	0.06069	0.0001	0.0001	0.0004
	Skjerstadfjord_Valnesfjord_2006	0.00556	0	0.00146	0	0	0	0	0	0	0	0	0.00044	0	0	0.00715	0	0.0006	0.00443	0	0	0	0	0	0	0	*	0.80042	0.93288	0.99287	0.56549	0.95723	0.13721	0.15127	0.08851	0.6832	0.03247	0.00168	0	0.04633	0.00059	0.41382	0.00139	0.7327	0.01218	0.08267	0	0.0001	0.00059
	Glomfjord_Ørnes_2004	0.00724	2e-05	0.00413	0.00322	0.00225	0.00429	0.00057	0.00132	0.00519	0.00184	0.00189	0.00308	0.00109	0	0.0073	0.00419	0.00275	0.00548	0.00029	0.00463	0.00575	0.00198	0.00102	0	0.00059	0	*	0.60746	0.85259	0.45065	0.77418	0.2675	0.06296	0.05297	0.23909	0.01673	0.00287	0	0.02247	0.01921	0.12821	0.00277	0.29651	0.00287	0.01416	0.0004	0.0002	0.00228
	LilleSjona_2004	0.00868	0.00106	0.00265	0.00318	0.00142	0.00256	0.00268	0.00019	0.00662	0.00182	0.00083	0	0.00124	0	0.00649	0.00083	0	0.00281	0.00103	0.00354	0.00297	0.00102	0.00525	0	0.00254	0	0	*	0.66538	0.11494	0.63954	0.15701	0.02148	0.00436	0.18652	0.02317	0.00099	0	0.02079	0.00406	0.16226	0.0004	0.25641	0.00099	0.00921	0.0001	0.0002	0.0002
	LilleSjona_2005	0.0068	0.00209	0.0023	0.0009	0.00117	0.00263	0	0.00051	0.00192	0	0.00025	0.00171	0	0	0.00703	0.00387	0.00448	0.00518	0	0.00367	0.00302	0.0011	0	0	0.00049	0	0	0	*	0.21127	0.65746	0.06178	0.06138	0.01228	0.19929	0.0003	0	0	0.0202	0.00089	0.2675	0	0.12672	0.0001	0.07385	0	0	0
	Vega_2002	0.01391	0.00576	0.00907	0.00087	0.00452	0.00574	0.00418	0.00655	0.00524	0.00747	0.00612	0.00457	0.00068	0.00309	0.00273	0.00536	0.00244	0.00244	0.00509	0.00074	8e-05	0.00477	0	0.0008	0	0	0.0011	0.00347	0.00317	*	0.3164	0.17196	0.34571	0.30433	0.1684	0.31215	0.01772	0.00594	0.02237	0.0098	0.26067	0.02247	0.51876	0.09346	0.09682	0.01228	0.05752	0.00693
	Vega_2003	0.00602	0.00087	0.00209	0	0.00021	0.0001	0.00087	0	0.00179	0	0.00044	0.00106	0	0	0.00781	0.00035	0.00298	0.00485	0.00088	0.00054	0.00057	0	0	0	0	0	0	0	0	0.00157	*	0.24215	0.05712	0.10583	0.2279	0.00653	0	0	0.00446	0.00089	0.10593	0.0001	0.14909	0	0.00396	0	0	0.0001
	Langesundet_2004	0.01954	0.00744	0.0124	0.0045	0.00719	0.00697	0.00581	0.00082	0.01052	0.00691	0.00451	0.00182	0.00199	0	0	0.00393	0.00037	0	0.0011	0.00405	0.00486	0	0.00302	0.00043	0.0018	0.00293	0.00197	0.00203	0.00379	0.00324	0.00154	*	0.82051	0.04168	0.0005	0.69765	0.11266	0.03554	0.78774	0.68508	0.52163	0.70429	0.74933	0.77953	0.69359	0.03653	0.07039	0.03742
	Vikna_2003	0.01975	0.00752	0.01178	0.0042	0.00631	0.00557	0.0055	0.00277	0.00993	0.00457	0.00507	0.00255	0.0021	0.0008	0	0.00566	0.00145	0.00016	0	0.00371	0.00526	0.0016	0	0.00069	0.00179	0.00227	0.00395	0.00384	0.00324	0.00108	0.0029	0	*	0.00525	0	0.38808	0.00386	0.01792	0.14939	0.60746	0.68162	0.31007	0.69953	0.4356	0.38521	0.01297	0.03722	0.00366
	Verrabotn_2005	0.01667	0.00743	0.01011	0.00214	0.0076	0.00804	0.00944	0.0099	0.0063	0.00735	0.01015	0.00465	0.00643	0.00649	0.00942	0.00566	0.0101	0.00919	0.00801	0	0.00346	0.00309	0.00058	0.00159	0.00207	0.00405	0.00551	0.0066	0.00594	0.00224	0.0028	0.00454	0.00655	*	0.03356	0.00099	0.00059	0	0.00297	0.0003	0.02822	0.00059	0.00376	0	0.0301	0	0	0
	Verrabotn_2006	0.0067	0.00542	0.00463	0.00355	0.00533	0.00627	0.00334	0.00621	0.00277	0.00358	0.00463	0.0069	0.00341	0.00797	0.01569	0.00553	0.00848	0.01164	0.00955	0.00213	0.00153	0.0068	0.00864	0.00307	0.00318	0	0.00246	0.00194	0.00236	0.00365	0.00174	0.00959	0.01252	0.00552	*	0	0	0	0	0	0.00366	0	0.00168	0	0	0	0	0
Møre	Frøya_2004	0.03113	0.01285	0.01985	0.00875	0.01101	0.01452	0.01111	0.00596	0.01882	0.01441	0.01049	0.00362	0.00539	0.00397	0	0.00413	0	0.00061	0.00327	0.00594	0.0056	0.00328	0.00831	0.00397	0.00516	0.00515	0.00644	0.00431	0.00925	0.00156	0.00582	0	0.00044	0.00894	0.0137	*	0.45085	0.78814	0.62321	0.277	0.37224	0.49223	0.39986	0.85892	0.17474	0.59044	0.81972	0.55282
	Hitra_Laksovik_2004	0.03315	0.01556	0.02332	0.00985	0.01646	0.01861	0.01377	0.00975	0.02011	0.01434	0.01245	0.00501	0.01111	0.00617	0.00088	0.00699	0.0011	0.00252	0.00506	0.00574	0.01021	0.00211	0.00944	0.00662	0.00683	0.00797	0.00822	0.00696	0.01063	0.0066	0.00955	0.00247	0.00502	0.00912	0.01507	0.00026	*	0.00317	0.33294	0.10603	0.06287	0.04792	0.02822	0.20394	0.5144	0.10831	0.17404	0.11345
	Smøla_2003	0.03811	0.01687	0.02615	0.01521	0.01924	0.01957	0.0169	0.01022	0.02218	0.01988	0.01791	0.00993	0.01123	0.00834	0.00341	0.00945	0.00243	0.00528	0.00737	0.00931	0.01127	0.00768	0.01622	0.00988	0.01202	0.01189	0.01497	0.01101	0.01603	0.0081	0.01357	0.00378	0.00387	0.01558	0.0226	0	0.00535	*	0.00564	0.00178	0.50223	0.00762	0.03406	0.28354	0.03416	0.03267	0.0396	0.24958
	Vinjefjord_2004	0.0251	0.00982	0.01656	0.00754	0.00902	0.01207	0.00772	0.00401	0.01371	0.00923	0.00656	0.0021	0.00429	0.00088	0	0.00364	0.00107	0.00038	0.001	0.00426	0.00518	0	0.00594	0.00276	0.00394	0.00378	0.00506	0.0036	0.00385	0.00588	0.00481	0	0.00154	0.00636	0.01129	0	0.00065	0.00443	*	0.29423	0.60558	0.28096	0.24621	0.84992	0.8115	0.1391	0.09068	0.06336
	Batnesfjord_2004	0.03	0.0155	0.02032	0.01193	0.01275	0.01464	0.01347	0.00704	0.02077	0.01158	0.00993	0.0037	0.00821	0.00499	0	0.00994	0	0	0.00018	0.00947	0.0127	0.00301	0.00538	0.00394	0.00862	0.01069	0.00672	0.00669	0.00855	0.00907	0.00831	0	0	0.01149	0.01874	0.00124	0.00267	0.00763	0.00104	*	0.15137	0.93506	0.13741	0.13533	0.24443	0.07415	0.10583	0.03277
	Buagrunn_2004	0.02009	0.00489	0.01125	0.00108	0.00434	0.00694	0.00406	2e-05	0.00588	0.00508	0.00603	0.00322	0.00018	0	0	0	0	0	0	0.00133	0	0	0.00633	0.00123	0.00434	0.00065	0.00465	0.00267	0.00246	0.00288	0.00372	0.00013	0	0.00761	0.01107	0.00085	0.00443	0	0	0.00337	*	0.09356	0.9608	0.56212	0.6435	0.24047	0.04594	0.06059
	Midsund_2004	0.03172	0.01606	0.02275	0.01122	0.01493	0.01713	0.01375	0.00763	0.02203	0.01325	0.01028	0.00327	0.00709	0.00777	0	0.008	0.00188	0.00114	0.0029	0.00716	0.01213	0.0046	0.00676	0.00439	0.00726	0.0093	0.00876	0.0085	0.00991	0.00685	0.00892	0	0.00089	0.00965	0.01713	0.00015	0.00329	0.00513	0.00102	0	0.00411	*	0.06504	0.33363	0.21463	0.2967	0.17087	0.06712
	Godøy_2004	0.0144	0.00266	0.01001	0.00064	0.0044	0.00516	0.00326	0	0.00769	0.00273	0.00198	0.00091	0.0002	0.00011	0	0.00042	0	6e-05	0	0.00283	0.00157	0.00151	0.00415	0	0.00176	0	0.00153	0.00118	0.00269	0.00021	0.00207	0	0	0.00772	0.00881	0.00047	0.00393	0.00359	0.00122	0.00263	0	0.00337	*	0.31235	0.38392	0.00366	0.03455	0.02307
	Borgunfjord_2004	0.02852	0.0119	0.01852	0.00791	0.01189	0.01368	0.00957	0.00724	0.01591	0.01105	0.00916	0.00412	0.00586	0.00268	0	0.00499	0.00076	0.00175	0.00204	0.00484	0.00698	0.00164	0.00696	0.00319	0.00465	0.00527	0.007	0.00566	0.00717	0.00343	0.00713	0	0.00024	0.00788	0.01403	0	0.00111	0.00077	0	0.00197	0	0.00072	0.00078	*	0.95396	0.10128	0.19196	0.05544
	Borgunfjord_2005	0.02397	0.01199	0.01566	0.00473	0.01057	0.01161	0.00833	0.00527	0.01202	0.00731	0.00729	0.00157	0.00608	0.00267	0	0.00527	0.00145	0.00211	0.0002	0.0016	0.00599	0	0.00324	0.00021	0.00301	0.00355	0.00652	0.00471	0.00314	0.00419	0.00562	0	0.00055	0.0044	0.01092	0.00191	0.00011	0.00352	0	0.00161	0	0.00165	0.0007	0	*	0.04802	0.10346	0.03119
Vestlandet	NV_Bømlo_2006	0.0369	0.01883	0.02316	0.01587	0.01712	0.01996	0.01362	0.00925	0.02438	0.01788	0.01533	0.0077	0.00943	0.0076	0.00079	0.00859	0.00422	0.00297	0.00456	0.0094	0.00788	0.00619	0.01563	0.0087	0.01002	0.01185	0.01209	0.00968	0.01205	0.00817	0.01281	0.00435	0.00508	0.01528	0.01769	0	0.00246	0.00381	0.002	0.0036	0.00201	0.00119	0.00737	0.00226	0.00369	*	0.34591	0.33086
	Nærøysund_2007	0.03441	0.01784	0.02444	0.01266	0.01803	0.01971	0.01516	0.01101	0.02394	0.01808	0.01177	0.00564	0.00982	0.00686	0	0.01085	0.00244	0.0016	0.00527	0.01061	0.01054	0.0084	0.01164	0.00722	0.00852	0.01037	0.01163	0.00819	0.0117	0.00464	0.01229	0.00295	0.00313	0.01202	0.01615	0	0.00147	0.00292	0.00207	0.00258	0.00497	0.00174	0.00355	0.00114	0.0022	0.00074	*	0.38442
	Byrknesøy_Gulen_2007	0.05222	0.02429	0.03807	0.02167	0.02671	0.03135	0.02241	0.01404	0.03514	0.02738	0.02184	0.01413	0.01737	0.01207	0.00195	0.01419	0.00783	0.00895	0.01345	0.01612	0.01904	0.01338	0.02281	0.01399	0.01666	0.0177	0.01639	0.01661	0.02084	0.0148	0.02039	0.00763	0.01114	0.02251	0.02759	0	0.00445	0.00226	0.00547	0.00807	0.00786	0.00599	0.00852	0.00543	0.00767	0.00181	0.00135	*
	Kolltveitosen_2004	0.02937	0.01415	0.02028	0.00719	0.01174	0.01352	0.01093	0.00759	0.01691	0.01314	0.00918	0.00386	0.00498	0.00404	0	0.00869	0.00191	0	0.00228	0.00458	0.00882	0.00182	0.00317	0.00283	0.00316	0.00556	0.00491	0.00626	0.00667	0	0.00602	0	0	0.00612	0.01312	0	0	0.00144	0	0.00034	0.00138	0	0.00111	0	0	0	0	0.00333
	Halsenøy_Kloster_2006	0.04763	0.02597	0.03524	0.01946	0.02654	0.02857	0.02305	0.01605	0.03275	0.02571	0.02131	0.01192	0.01647	0.01435	0	0.01355	0.00523	0.00492	0.01084	0.01557	0.017	0.01263	0.01954	0.0148	0.01819	0.01731	0.01945	0.0157	0.01996	0.01364	0.01986	0.00657	0.00784	0.01909	0.02647	0.00097	0.00408	0.00252	0.00479	0.00474	0.00468	0.0016	0.00782	0.0036	0.00589	0.00048	0.00016	0.00081
	Ålfjord_2004	0.0243	0.01062	0.017	0.00614	0.01015	0.01082	0.01027	0.00542	0.0142	0.01051	0.00775	0.00322	0.00269	0.00479	0.00064	0.00589	0.00142	0	0.003	0.00534	0.0056	0.00378	0.00519	0.0026	0.00259	0.00507	0.00751	0.00524	0.00709	0	0.00553	0	0.00036	0.00713	0.011	0	0.00279	0.00353	0.00097	0.00133	0.00229	8e-05	0.00021	7e-05	0.00128	0.00208	4e-05	0.0065
	Boknafjord_v/Finnøy_2006	0.03983	0.01814	0.0276	0.0135	0.01843	0.02251	0.0173	0.01306	0.02671	0.01955	0.01364	0.00978	0.00926	0.0111	0.00161	0.01235	0.00403	0.00409	0.00609	0.01413	0.01709	0.01215	0.0074	0.0112	0.01012	0.0111	0.01249	0.01132	0.0108	0.00947	0.01474	0.00532	0.00375	0.01453	0.02105	0.00322	0.00695	0.00866	0.00497	0.00156	0.00866	0.00121	0.00669	0.00503	0.00547	0.00657	0.00278	0.00551
	Finnøy_2007	0.03979	0.01927	0.02701	0.01179	0.01818	0.02025	0.01524	0.01025	0.02108	0.01541	0.015	0.0056	0.01054	0.00849	0	0.00693	0.00238	0.00318	0.00512	0.00857	0.01174	0.00261	0.01104	0.00686	0.01145	0.00906	0.01641	0.01069	0.01206	0.01035	0.01242	0.00273	0.00115	0.01444	0.02352	0	0.00165	0	0	0.00226	0	0.00143	0.00149	0	0	0.00241	0.0011	0.00221
	Tau_2007	0.02698	0.00914	0.01751	0.00662	0.01329	0.01362	0.0108	0.00572	0.01847	0.01085	0.00536	0.00076	0.00525	0.00101	0	0.00145	0	0	0.00282	0.00626	0.00853	0.00108	0.0067	0.00191	0.0054	0.00473	0.00626	0.00093	0.0057	0.00512	0.0071	0	0	0.00666	0.0143	0	0.00014	0.00025	0	0	0	0	0	0	0	0.00295	0	0.00515
Sørlandet	Siragrunnen_2007	0.03204	0.01438	0.0233	0.01104	0.01464	0.0172	0.01305	0.00665	0.01993	0.01313	0.01066	0.00481	0.00756	0.00509	0	0.00654	0	0.00159	0.00151	0.00598	0.00952	0.00371	0.00962	0.00513	0.00761	0.00767	0.00953	0.00823	0.01065	0.00587	0.00961	0.00098	0.00112	0.01268	0.01818	0	0.00166	0	0	0.0009	0.00014	0	0	0	0.00058	0.00348	0.00108	0.00185
	Lista_nordveSt2007	0.04337	0.02474	0.03214	0.01601	0.02269	0.02557	0.02099	0.01863	0.02649	0.02739	0.02238	0.01379	0.01568	0.01598	0.00398	0.01186	0.0075	0.0092	0.01529	0.00881	0.00821	0.01212	0.01971	0.0135	0.01189	0.01518	0.02072	0.01555	0.02063	0.00245	0.01654	0.00906	0.01002	0.01387	0.01792	0.00014	0.00526	0.00142	0.00655	0.01513	0.00591	0.00998	0.00681	0.00377	0.00707	0.00547	0.00286	0.00884
	Farsund_2005	0.04008	0.02198	0.02822	0.01932	0.02209	0.02471	0.01943	0.01245	0.02885	0.01822	0.01866	0.00913	0.01792	0.01014	0.00226	0.01023	0.00601	0.0076	0.00431	0.00993	0.01494	0.00471	0.0162	0.00816	0.01329	0.015	0.01116	0.01223	0.01548	0.01643	0.01535	0.00465	0.00691	0.01341	0.02455	0.00273	0.00288	0.00494	0.00199	0.00154	0.00511	0.0021	0.00712	0.00318	0.00204	0.00286	0.00513	0.0029
	Mandal_2005	0.0382	0.0187	0.02778	0.01623	0.01875	0.02226	0.01591	0.01052	0.02502	0.0167	0.01466	0.00733	0.01107	0.00772	0	0.01016	0.0025	0.00329	0.00497	0.00934	0.016	0.00644	0.01184	0.00789	0.0127	0.01167	0.00987	0.01046	0.01167	0.01182	0.01335	0.00239	0.00278	0.01448	0.02124	0.00139	0.0034	0.00257	0.0006	0	0.00186	0	0.00503	0.00087	0.0019	0.00271	0.00359	0.00063
	Lillesand_ytre_2005	0.04303	0.02376	0.03023	0.02049	0.02331	0.0255	0.02034	0.01442	0.02882	0.02246	0.0201	0.01166	0.01557	0.00846	0.00123	0.01215	0.00435	0.00517	0.00704	0.01512	0.01734	0.00719	0.01762	0.01147	0.01629	0.0178	0.01622	0.01357	0.01534	0.01408	0.01756	0.00274	0.00492	0.0199	0.02718	0.00261	0.00537	0.00132	0.0022	0.00192	0.0028	0.00371	0.0058	0.00021	0.00247	0.00465	0.00414	0.00747
	Vallesverdfjord/Lillesand_2005	0.04392	0.02127	0.03101	0.01661	0.02157	0.02431	0.01972	0.01334	0.02765	0.02167	0.01748	0.00919	0.01366	0.0108	0	0.01021	0.00085	0.00198	0.00584	0.01067	0.01439	0.00596	0.01432	0.01064	0.01246	0.01329	0.01484	0.01136	0.01624	0.00948	0.01637	0.00197	0.00301	0.01417	0.02539	0	0.00074	0	0.00109	0	0.00281	0	0.00354	0	0.00069	0.00202	0	0.00232
	Lillesand_2007	0.03882	0.02053	0.0285	0.01751	0.02267	0.02275	0.018	0.01171	0.02838	0.01857	0.01601	0.00963	0.01357	0.00818	0.00073	0.01003	0.0044	0.00425	0.00539	0.01143	0.01494	0.00749	0.0159	0.00961	0.01468	0.01402	0.01517	0.01214	0.01468	0.01234	0.01555	0.00343	0.00408	0.01729	0.02365	0.00091	0.00368	0.00039	0.00173	0.00261	0.00167	0.00066	0.00415	0.00074	0.0021	0.00021	0.00126	0.00159
	Sønledfjord_Nordfjord_Risør_2005	0.03771	0.02301	0.02842	0.01408	0.02097	0.02234	0.01905	0.01514	0.02404	0.01915	0.01716	0.00991	0.01328	0.01398	0.00013	0.01293	0.00346	0.00345	0.0074	0.0076	0.01252	0.00661	0.01103	0.00966	0.01028	0.01252	0.01415	0.0122	0.01476	0.00588	0.01403	0.00378	0.00429	0.01111	0.01881	0.002	0.00274	0.00446	0.00428	0.00259	0.00467	0.00058	0.00556	0.00205	0.00159	0.00336	0.00315	0.00996
	Risør_ytre_2005	0.04051	0.02087	0.03219	0.01783	0.02289	0.02463	0.01809	0.01242	0.02611	0.02068	0.01646	0.01037	0.01133	0.0108	0.00172	0.01026	0.00506	0.00318	0.00971	0.01147	0.01487	0.00702	0.01515	0.01147	0.01402	0.01278	0.01433	0.0124	0.01449	0.01293	0.01448	0.00226	0.00604	0.01436	0.02025	0.00069	0.00258	0.00328	0.00037	0.0034	0.00459	0.00122	0.00623	0.00178	0.00303	0.00351	0.00251	0.00408
	Oslofjord_2005	0.02242	0.01076	0.0148	0.00644	0.00861	0.01066	0.00929	0.00659	0.01373	0.01033	0.00698	0.00334	0.0034	0.00484	0.00236	0.00623	0.0007	0	0.00324	0.00332	0.00393	0.00346	0.00619	0.00315	0.00347	0.00346	0.00557	0.00337	0.00671	0	0.00476	0.00142	0.0019	0.00699	0.00757	0	0.00268	0.00641	0.00187	0.00321	0.00218	0.00182	0.00238	0.00239	0.00321	0.00092	0.00169	0.00805
	Larkollen_2005	0.05263	0.02837	0.0371	0.02325	0.02847	0.0311	0.02682	0.01865	0.03565	0.02921	0.02565	0.01444	0.02071	0.01374	0.00249	0.01667	0.00547	0.0087	0.01024	0.01707	0.01983	0.01402	0.02199	0.01611	0.01989	0.02214	0.02225	0.01885	0.02324	0.0153	0.02268	0.00767	0.00774	0.02273	0.03216	0.00152	0.00544	0	0.00713	0.00503	0.00692	0.00535	0.00918	0.00339	0.00607	0.00452	0.0024	0.00083
	Hvaler_2005	0.0507	0.02608	0.03591	0.02433	0.02901	0.03013	0.02679	0.01839	0.03758	0.0287	0.02394	0.01353	0.01963	0.01323	0.00347	0.01385	0.0072	0.00848	0.01271	0.018	0.02111	0.01307	0.02234	0.01592	0.01941	0.02003	0.02287	0.01587	0.02267	0.0154	0.02157	0.00862	0.00849	0.02265	0.03286	0.00181	0.00604	0	0.00679	0.00886	0.00721	0.00603	0.00969	0.0039	0.00718	0.00445	0.00404	0.00407
[truncated: 18 more columns]

## Sheet: Classification Fst values
Non-sign Fst within regions	Sign Fst within regions	Non-sign Fst amon regions	Sign Fst among regions					No values	TOTAL COMPARISONS	TOTAL GROUPS	Percentage (TOTAL)	Percentage (GROUPS)
0	0.00319	0	0.00239				WITHIN-Significant Fst	47	2205	297	2.13152	15.8249
0	0.00329	0	0.00268				WITHIN_ non-significant Fst	250	2205	297	11.3379	84.1751
0	0.00359	0	0.00279				AMONG_Significant Fst	1099	2205	1908	49.8413	57.5996
0	0.00363	0	0.00292				AMONG_Non-significant Fst	809	2205	1908	36.6893	42.4004
0	0.00375	0	0.00313				TOTAL comparisons	2205
0	0.0038	0	0.00315
0	0.0038	0	0.00319
0	0.00384	0	0.00321
0	0.00385	0	0.00322
0	0.00393	0	0.00326
0	0.00393	0	0.00328
0	0.00404	0	0.00334
0	0.00422	0	0.00337
0	0.00452	0	0.00339
0	0.00463	0	0.0034
0	0.00471	0	0.0034
0	0.00475	0	0.00343
0	0.00495	0	0.00345
0	0.00507	0	0.00346
0	0.00513	0	0.00347
0	0.00517	0	0.00352
0	0.00525	0	0.00353
0	0.00527	0	0.00355
0	0.00535	0	0.00359
0	0.00552	0	0.0036
0	0.00552	0	0.0036
0	0.00558	0	0.00368
0	0.00563	0	0.00369
0	0.00567	0	0.00371
0	0.00587	0	0.00375
0	0.00589	0	0.00378
0	0.00623	0	0.00378
0	0.00646	0	0.00378
0	0.0065	0	0.00378
0	0.00657	0	0.00381
0	0.00674	0	0.00381
0	0.00698	0	0.00385
0	0.00709	0	0.00387
0	0.00723	0	0.0039
0	0.00868	0	0.00394
0	0.00907	0	0.004
0	0.00929	0	0.00401
0	0.00954	0	0.00404
0	0.00977	0	0.00408
0	0.01065	0	0.00408
0	0.01153	0	0.00409
0	0.01288	0	0.0041
0		0	0.00412
0		0	0.00414
0		0	0.00415
0		0	0.0042
0		0	0.00422
0		0	0.00425
0		0	0.00426
0		0	0.00426
0		0	0.00428
0		0	0.00429
0		0	0.00429
0		0	0.00431
0		0	0.00435
0		0	0.00439
0		0	0.0044
0		0	0.0044
0		0	0.0044
0		0	0.00443
0		0	0.00445
0		0	0.00446
0		0	0.00451
0		0	0.00452
0		0	0.00454
0		0	0.00454
0		0	0.00457
0		0	0.0046
0		0	0.00463
0		0	0.00463
0		0	0.00464
0		0	0.00465
0		0	0.00465
0		0	0.00465
0		0	0.00466
0		0	0.00468
0		0	0.00469
0		0	0.00471
0		0	0.00473
0		0	0.00474
0		0	0.00476
0		0	0.00477
0		0	0.00479
0		0	0.00479
0		0	0.00481
0		0	0.00481
0		0	0.00481
0		0	0.00483
0		0	0.00484
0		0	0.00484
0		0	0.00485
0		0	0.0049
0		0	0.00492
0		0	0.00492
0		0	0.00494
0		0	0.00494
0		0	0.00497
0		0	0.00497
0		0	0.00497
0		0	0.00498
0		0	0.00499
0		0	0.00499
0		0	0.005
0		0	0.00501
0		0	0.00502
0		0	0.00503
0		0	0.00503
0		0	0.00503
0		0	0.00506
0		0	0.00506
0		0	0.00506
0		0	0.00507
0		0	0.00507
0		0	0.00508
0		0	0.00509
0		0	0.00513
0		0	0.00513
0		0	0.00514
0		0	0.00515
0		0	0.00516
0		0	0.00516
0		0	0.00517
0		0	0.00518
0		0	0.00518
0		0	0.00519
0		0	0.00521
0		0	0.00523
0		0	0.00523
0		0	0.00524
0		0	0.00526
0		0	0.00526
0		0	0.00527
0		0	0.00527
0		0	0.00527
0		0	0.00527
0		0	0.00527
4e-05		0	0.00528
5e-05		0	0.00532
7e-05		0	0.00533
0.0001		0	0.00534
0.00011		0	0.00535
0.00015		0	0.00535
0.00016		0	0.00535
0.00018		0	0.00537
0.00018		0	0.00537
0.00019		0	0.00538
0.00021		0	0.00539
0.00022		0	0.00539
0.00026		0	0.00539
0.00033		0	0.0054
0.00043		0	0.00542
0.00047		0	0.00542
0.00048		0	0.00542
0.00049		0	0.00542
0.00049		0	0.00544
0.00049		0	0.00546
0.00053		0	0.00547
0.00059		0	0.00547
0.00061		0	0.00547
0.00066		0	0.00548
0.00069		0	0.0055
0.00074		0	0.0055
0.00077		0	0.00553
0.0008		0	0.00553
0.00081		0	0.00556
0.00081		0	0.00556
0.00082		0	0.00556
0.00085		0	0.00557
0.0009		0	0.00557
0.00102		0	0.0056
0.00104		0	0.0056
0.00104		0	0.0056
0.00107		0	0.00562
0.00108		0	0.00564
0.0011		0	0.00566
0.0011		0	0.00566
0.00114		0	0.00566
0.0012		0	0.00567
0.00135		0	0.00569
0.00137		0	0.00572
0.00138		0	0.00574
0.00138		0	0.00574
0.00154		0	0.00579
0.00157		0	0.0058
0.00161		0	0.00581
0.00163		0	0.00582
0.00165		0	0.00583
0.00168		0	0.00585
0.00179		1e-05	0.00586
0.0018		2e-05	0.00587
0.00181		2e-05	0.00588
0.00193		3e-05	0.00588
0.00197		6e-05	0.00588
0.00197		6e-05	0.00589
0.00198		7e-05	0.00589
0.00199		8e-05	0.00593
0.00199		8e-05	0.00594
0.00203		0.0001	0.00594
0.00205		0.00011	0.00594
0.00208		0.00011	0.00594
0.00209		0.00013	0.00596
0.00221		0.00013	0.00596
0.00223		0.00014	0.00598
0.00224		0.00014	0.00599
0.00227		0.00014	0.00602
0.00236		0.00016	0.00602
0.0024		0.00016	0.00603
0.00241		0.00016	0.00603
0.00252		0.00018	0.00604
0.00252		0.00018	0.00604
0.00254		0.00019	0.00607
0.00256		0.0002	0.00608
0.00258		0.0002	0.00609
0.00276		0.00021	0.00609
0.00278		0.00021	0.00612
0.00281		0.00021	0.00614
0.0029		0.00021	0.00617
0.00293		0.00021	0.00619
0.00295		0.00021	0.00619
0.00301		0.00024	0.00621
0.00302		0.00025	0.00623
0.0031		0.00025	0.00623
0.00317		0.00029	0.00624
0.00317		0.00031	0.00626
0.00323		0.00033	0.00627
0.00324		0.00034	0.0063
0.00324		0.00035	0.00631
0.00333		0.00035	0.00636
0.00337		0.00035	0.00641
0.00341		0.00036	0.00643
0.00347		0.00037	0.00644
0.00373		0.00037	0.00644
0.00374		0.00038	0.00644
0.00379		0.00038	0.00649
0.00382		0.00039	0.00649
0.00384		0.00039	0.00651
0.00394		0.00039	0.00652
0.00395		0.00041	0.00654
0.00402		0.00042	0.00655
0.00411		0.00043	0.00655
0.00418		0.00044	0.00655
0.00443		0.00044	0.00655
0.00476		0.00044	0.00656
0.00515		0.00044	0.00657
0.00551		0.00046	0.00659
		0.00048	0.0066
		0.0005	0.0066
		0.00051	0.00661
		0.00052	0.00662
		0.00053	0.00662
		0.00054	0.00662
		0.00055	0.00665
		0.00057	0.00667
		0.00057	0.00667
		0.00058	0.00669
		0.00058	0.00669
		0.00058	0.0067
		0.0006	0.00671
		0.0006	0.00672
		0.00061	0.00673
		0.00063	0.00676
		0.00064	0.00679
		0.00064	0.0068
		0.00065	0.0068
		0.00065	0.00681
		0.00065	0.00683
		0.00065	0.00685
		0.00066	0.00686
		0.00067	0.00686
		0.00068	0.0069
		0.00069	0.00691
		0.00069	0.00691
		0.0007	0.00692
		0.0007	0.00693
		0.0007	0.00693
		0.00072	0.00694
		0.00073	0.00695
		0.00074	0.00696
		0.00074	0.00696
		0.00074	0.00697
		0.00076	0.00698
		0.00076	0.00698
		0.00077	0.00699
		0.00078	0.00699
		0.00079	0.007
		0.0008	0.00702
		0.00081	0.00703
		0.00082	0.00704
		0.00083	0.00704
		0.00083	0.00707
		0.00083	0.00709
		0.00084	0.00709
		0.00085	0.0071
		0.00087	0.00711
		0.00087	0.00712
		0.00087	0.00713
		0.00087	0.00713
		0.00088	0.00713
		0.00088	0.00715
		0.00088	0.00715
		0.00089	0.00716
		0.0009	0.00716
		0.0009	0.00717
		0.0009	0.00718
		0.0009	0.00718
		0.00091	0.00719
		0.00091	0.00719
		0.00092	0.00719
		0.00093	0.0072
		0.00093	0.00721
		0.00097	0.00722
		0.00097	0.00723
		0.00098	0.00724
		0.00099	0.00724
		0.001	0.00726
		0.001	0.00729
		0.00101	0.0073
		0.00102	0.00731
		0.00102	0.00733
		0.00102	0.00735
		0.00103	0.00737
		0.00106	0.00737
		0.00106	0.0074
		0.00107	0.0074
		0.00108	0.00743
		0.00108	0.00744
		0.00108	0.00745
		0.00109	0.00747
		0.00109	0.00747
		0.0011	0.00749
		0.0011	0.0075
		0.0011	0.00751
		0.0011	0.00752
		0.00111	0.00754
		0.00111	0.00756
		0.00112	0.00757
		0.00113	0.00759
		0.00113	0.0076
		0.00114	0.0076
		0.00114	0.0076
		0.00114	0.0076
		0.00115	0.0076
		0.00116	0.00761
		0.00117	0.00761
		0.00118	0.00763
		0.00118	0.00763
		0.00118	0.00763
		0.00119	0.00767
		0.00121	0.00767
		0.00122	0.00767
		0.00122	0.00768
		0.00123	0.00769
		0.00123	0.0077
		0.00123	0.00772
		0.00124	0.00772
		0.00124	0.00772
		0.00125	0.00774
		0.00126	0.00775
		0.00126	0.00777
		0.00127	0.00779
		0.00128	0.00781
		0.0013	0.00782
		0.00131	0.00784
		0.00132	0.00788
		0.00132	0.00788
		0.00132	0.00789
		0.00133	0.00791
		0.00133	0.00791
		0.00135	0.00797
		0.00137	0.00797
		0.00138	0.008
		0.00139	0.00801
		0.00139	0.00804
		0.00142	0.00805
		0.00142	0.00807
		0.00142	0.0081
		0.00142	0.00812
		0.00143	0.00816
		0.00143	0.00816
		0.00144	0.00817
		0.00144	0.00818
		0.00145	0.00819
		0.00145	0.00821
		0.00145	0.00821
		0.00146	0.00821
		0.00147	0.00822
		0.00149	0.00823
		0.0015	0.00827
		0.00151	0.00827
		0.00151	0.00831
		0.00152	0.00831
		0.00153	0.00833
		0.00153	0.00834
		0.00153	0.0084
		0.00154	0.00844
		0.00154	0.00846
		0.00154	0.00848
		0.00156	0.00848
		0.00156	0.00849
		0.00156	0.00849
		0.00157	0.0085
		0.00157	0.00852
		0.00157	0.00852
		0.00157	0.00854
		0.00158	0.00855
		0.00159	0.00857
		0.00159	0.00859
		0.00159	0.00861
		0.00159	0.00861
		0.0016	0.00862
		0.0016	0.00862
		0.0016	0.00864
		0.0016	0.00866
		0.00161	0.00866
		0.00161	0.00868
		0.00163	0.00869
		0.00163	0.0087
		0.00164	0.0087
		0.00165	0.00874
		0.00165	0.00875
		0.00166	0.00876
		0.00166	0.00878
		0.00167	0.00881
		0.00167	0.00881
		0.00169	0.00882
		0.0017	0.00884
		0.0017	0.00884
		0.00171	0.00886
		0.00172	0.00892
		0.00173	0.00894
		0.00174	0.00895
		0.00174	0.00902
		0.00175	0.00906
		0.00176	0.00906
		0.00178	0.00907
		0.00178	0.00907
		0.00178	0.0091
		0.00179	0.00912
		0.00181	0.00912
		0.00182	0.00913
		0.00182	0.00914
		0.00182	0.00916
		0.00182	0.00918
		0.00184	0.00918
		0.00184	0.00919
		0.00185	0.00919
		0.00185	0.00919
		0.00186	0.0092
		0.00187	0.00922
		0.00187	0.00923
		0.00188	0.00923
		0.00189	0.00924
		0.00189	0.00925
		0.0019	0.00925
		0.0019	0.00926
		0.00191	0.00929
		0.00191	0.0093
		0.00191	0.00931
		0.00192	0.00934
		0.00192	0.0094
		0.00192	0.00942
		0.00194	0.00943
		0.00195	0.00944
		0.00195	0.00944
		0.00197	0.00945
		0.00198	0.00947
		0.00198	0.00947
		0.00198	0.00948
		0.00198	0.00949
		0.00199	0.00952
		0.00199	0.00953
		0.002	0.00955
		0.002	0.00955
		0.002	0.00957
		0.00201	0.00959
		0.00202	0.00961
		0.00202	0.00961
		0.00204	0.00962
		0.00204	0.00963
		0.00205	0.00965
		0.00207	0.00966
		0.00207	0.00968
		0.00207	0.00969
		0.00207	0.00971
		0.00207	0.00975
		0.00209	0.00978
		0.00209	0.00982
		0.0021	0.00982
		0.0021	0.00985
		0.0021	0.00987
		0.0021	0.00988
		0.0021	0.0099
		0.0021	0.00991
		0.0021	0.00991
		0.00211	0.00991
		0.00211	0.00993
		0.00212	0.00993
		0.00212	0.00993
		0.00213	0.00993
		0.00214	0.00994
		0.00215	0.00996
		0.00215	0.00998
		0.00215	0.01001
		0.00216	0.01002
		0.00217	0.01002
		0.00218	0.01003
		0.00218	0.0101
		0.00219	0.01011
		0.0022	0.01012
		0.0022	0.01014
		0.00221	0.01015
		0.00224	0.01015
		0.00225	0.01016
		0.00226	0.01021
		0.00226	0.01021
		0.00226	0.01022
		0.00226	0.01023
		0.00226	0.01024
		0.00226	0.01025
		0.00227	0.01026
		0.00227	0.01027
		0.00228	0.01028
		0.00229	0.01028
		0.0023	0.01033
		0.00231	0.01035
		0.00231	0.01037
		0.00232	0.01037
		0.00234	0.01046
		0.00236	0.01048
		0.00236	0.01049
		0.00236	0.01051
		0.00237	0.01052
		0.00237	0.01052
		0.00238	0.01054
		0.00238	0.01054
		0.00239	0.01057
		0.0024	0.01061
		0.0024	0.01062
		0.00243	0.01063
		0.00244	0.01064
		0.00244	0.01065
		0.00244	0.01066
		0.00245	0.01066
		0.00245	0.01067
		0.00246	0.01069
		0.00246	0.01069
		0.00246	0.01076
		0.00246	0.0108
		0.00247	0.0108
		0.00247	0.0108
		0.00249	0.0108
		0.0025	0.0108
		0.0025	0.01081
		0.00251	0.01082
		0.00252	0.01084
		0.00252	0.01085
		0.00255	0.01085
		0.00256	0.01092
		0.00257	0.01093
		0.00258	0.01098
		0.00258	0.011
		0.00259	0.01101
		0.00259	0.01101
		0.0026	0.01101
		0.00261	0.01103
		0.00261	0.01104
		0.00261	0.01104
		0.00263	0.01105
		0.00263	0.01107
		0.00265	0.01107
		0.00266	0.0111
		0.00267	0.0111
		0.00267	0.01111
		0.00267	0.01111
		0.00268	0.01111
		0.00268	0.01114
		0.00269	0.01116
		0.00269	0.0112
		0.00271	0.01122
		0.00273	0.01123
		0.00273	0.01125
		0.00273	0.01127
		0.00273	0.01129
		0.00274	0.01132
		0.00274	0.01133
		0.00274	0.01136
		0.00275	0.01143
		0.00276	0.01145
		0.00277	0.01145
		0.00277	0.01147
		0.00278	0.01147
		0.0028	0.01147
		0.0028	0.01149
		0.00281	0.01158
		0.00281	0.01161
		0.00281	0.01163
		0.00282	0.01164
		0.00282	0.01164
		0.00283	0.01166
		0.00283	0.01167
		0.00283	0.01167
		0.00284	0.0117
		0.00286	0.01171
		0.00286	0.01174
		0.00286	0.01174
		0.00288	0.01177
		0.00288	0.01178
		0.00288	0.01179
		0.00289	0.01182
		0.0029	0.01184
		0.0029	0.01185
		0.0029	0.01186
		0.0029	0.01186
		0.00295	0.01189
		0.00295	0.01189
		0.00297	0.01189
		0.00297	0.0119
		0.00298	0.01192
		0.00299	0.01193
		0.003	0.01199
		0.00301	0.01202
		0.00301	0.01202
		0.00301	0.01202
		0.00301	0.01205
		0.00301	0.01206
		0.00302	0.01207
		0.00303	0.01207
		0.00307	0.01209
		0.00308	0.01212
		0.00309	0.01213
		0.00309	0.01214
		0.0031	0.01215
		0.00313	0.01215
		0.00314	0.0122
		0.00314	0.01221
		0.00315	0.01223
		0.00316	0.01229
		0.00317	0.01234
		0.00318	0.01235
		0.00318	0.0124
		0.00318	0.0124
		0.00318	0.01242
		0.00318	0.01242
		0.00321	0.01245
		0.00322	0.01245
		0.00322	0.01246
		0.00322	0.01249
		0.00324	0.0125
		0.00324	0.01252
		0.00325	0.01252
		0.00327	0.01252
		0.00327	0.01263
		0.00328	0.01266
		0.00329	0.01268
		0.00329	0.0127
		0.00332	0.0127
		0.00334	0.01271
		0.00334	0.01275
		0.00335	0.01275
		0.00336	0.01278
		0.00336	0.01281
		0.00336	0.01285
		0.00336	0.01293
		0.00337	0.01293
		0.00337	0.01305
		0.0034	0.01306
		0.00341	0.01307
		0.00341	0.01312
		0.00343	0.01313
		0.00343	0.01314
		0.00343	0.01321
		0.00346	0.01323
		0.00346	0.01324
		0.00346	0.01325
		0.00347	0.01326
		0.00348	0.01328
		0.00351	0.01329
		0.00354	0.01329
		0.00354	0.01329
		0.00354	0.01334
		0.00355	0.01335
		0.00355	0.01336
		0.00355	0.01338
		0.00358	0.01341
		0.00358	0.01345
		0.0036	0.01347
		0.00361	0.0135
		0.00362	0.0135
		0.00364	0.01352
		0.00365	0.01353
		0.00367	0.01355
		0.0037	0.01357
		0.00371	0.01357
		0.00371	0.01357
		0.00371	0.01357
		0.00372	0.01362
		0.00377	0.01362
		0.00378	0.01364
		0.00379	0.01364
		0.00386	0.01366
		0.00386	0.01368
		0.00387	0.0137
		0.00387	0.01371
		0.00389	0.01373
		0.00391	0.01374
		0.00393	0.01375
		0.00393	0.01377
		0.00394	0.01379
		0.00397	0.01385
		0.00397	0.01387
		0.00398	0.01387
		0.00401	0.01391
		0.00402	0.01398
		0.00402	0.01399
		0.00403	0.01402
		0.00404	0.01402
		0.00405	0.01402
		0.00405	0.01403
		0.00405	0.01403
		0.00406	0.01404
		0.00407	0.01408
		0.00408	0.01408
		0.00413	0.01413
		0.00413	0.01413
		0.00415	0.01415
		0.00418	0.01415
		0.00418	0.01417
		0.00419	0.01419
		0.00419	0.0142
		0.00419	0.0143
		0.00421	0.01432
		0.00422	0.01433
		0.00429	0.01434
		0.0043	0.01435
		0.00431	0.01436
		0.00431	0.01438
		0.00432	0.01439
		0.00434	0.0144
		0.00434	0.01441
		0.00435	0.01442
		0.00443	0.01444
		0.00445	0.01444
		0.00448	0.01448
		0.0045	0.01448
		0.00452	0.01449
		0.00456	0.01452
		0.00457	0.01453
		0.00458	0.01464
		0.00459	0.01464
		0.00463	0.01466
		0.00464	0.01468
		0.00464	0.01468
		0.00465	0.01474
		0.00465	0.01476
		0.00467	0.0148
		0.00469	0.0148
		0.00471	0.0148
		0.00473	0.01484
		0.00477	0.01487
		0.00477	0.01493
		0.00486	0.01494
		0.00487	0.01494
		0.00489	0.01497
		0.00491	0.015
		0.00491	0.015
		0.00497	0.01507
		0.00499	0.01512
		0.00508	0.01513
		0.00509	0.01514
		0.0051	0.01515
		0.00511	0.01516
		0.00512	0.01517
		0.00512	0.01518
		0.00519	0.01521
		0.00524	0.01524
		0.00525	0.01528
		0.00536	0.01529
		0.00536	0.0153
		0.0054	0.01533
		0.00543	0.01534
		0.00547	0.01535
		0.00551	0.0154
		0.00555	0.01541
		0.0057	0.01548
		0.0057	0.0155
		0.00572	0.01555
		0.00573	0.01555
		0.00575	0.01556
		0.00576	0.01557
		0.00584	0.01557
		0.00591	0.01558
		0.00599	0.01563
		0.00601	0.01566
		0.00612	0.01568
		0.00621	0.01569
		0.00626	0.0157
		0.00626	0.01578
		0.00633	0.01587
		0.00662	0.01587
		0.00666	0.0159
		0.0067	0.01591
		0.00783	0.01591
		0.00786	0.01592
		0.00853	0.01596
			0.01598
			0.016
			0.01601
			0.01601
			0.01603
			0.01605
			0.01606
			0.01611
			0.01612
			0.01615
			0.0162
			0.01622
			0.01622
			0.01623
			0.01624
			0.01629
			0.01634
			0.01637
			0.01639
			0.01641
			0.01643
			0.01643
			0.01646
			0.01646
			0.01647
			0.01654
			0.01656
			0.01661
			0.01661
			0.01666
			0.01667
			0.01667
			0.0167
			0.01687
			0.0169
			0.01691
			0.017
			0.017
			0.01707
			0.01709
			0.01712
			0.01713
			0.01713
			0.01716
			0.01717
			0.0172
			0.01729
			0.0173
			0.01731
			0.01734
			0.01737
			0.01748
			0.01751
			0.01751
			0.01756
			0.01762
			0.01769
			0.0177
			0.0178
			0.01783
			0.01784
			0.01788
			0.01791
			0.01792
			0.01792
			0.018
			0.018
			0.01803
			0.01808
			0.01809
			0.01814
			0.01818
			0.01818
			0.01819
			0.01822
			0.01839
			0.01843
			0.01847
			0.01852
			0.01857
			0.01861
			0.01863
			0.01865
			0.01866
			0.0187
			0.01874
			0.01875
			0.01881
			0.01882
			0.01883
			0.01885
			0.01904
			0.01905
			0.01909
			0.01915
			0.01924
			0.01927
			0.01932
			0.01941
			0.01943
			0.01945
			0.01946
			0.01954
			0.01954
			0.01955
			0.01957
			0.01963
			0.01971
			0.01971
			0.01972
			0.01975
			0.01983
			0.01985
			0.01985
			0.01986
			0.01988
			0.01989
			0.0199
			0.01993
			0.01996
			0.01996
			0.02003
			0.02009
			0.0201
			0.02011
			0.02025
			0.02025
			0.02028
			0.02032
			0.02034
			0.02039
			0.02049
			0.02053
			0.02063
			0.02068
			0.02071
			0.02072
			0.02077
			0.02084
			0.02087
			0.02097
			0.02099
			0.02105
			0.02108
			0.02111
			0.02124
			0.02127
			0.02131
			0.02157
			0.02157
			0.02157
			0.02167
			0.02167
			0.02184
			0.02198
			0.02199
			0.02202
			0.02203
			0.02209
			0.02212
			0.02214
			0.02218
			0.02225
			0.02226
			0.02234
			0.02234
			0.02238
			0.02241
			0.02242
			0.02246
			0.02251
			0.02251
			0.0226
			0.02265
			0.02267
			0.02267
			0.02268
			0.02269
			0.02273
			0.02275
			0.02275
			0.02281
			0.02287
			0.02289
			0.02301
			0.02305
			0.02316
			0.02324
			0.02325
			0.0233
			0.02331
			0.02332
			0.02352
			0.02365
			0.02376
			0.02394
			0.02394
			0.02397
			0.02404
			0.02429
			0.0243
			0.02431
			0.02433
			0.02438
			0.02444
			0.02455
			0.02463
			0.02471
			0.02474
			0.02502
			0.0251
			0.02539
			0.0255
			0.02557
			0.02565
			0.02571
			0.02597
			0.02608
			0.02611
			0.02615
			0.02647
			0.02649
			0.02654
			0.02671
			0.02671
			0.02679
			0.02682
			0.02698
			0.02701
			0.02718
			0.02738
			0.02739
			0.02759
			0.0276
			0.02765
			0.02778
			0.02822
			0.02837
			0.02838
			0.02842
			0.02847
			0.0285
			0.02852
			0.02857
			0.0287
			0.02882
			0.02885
			0.02901
			0.02921
			0.02937
			0.03
			0.03013
			0.03023
			0.03101
			0.0311
			0.03113
			0.03135
			0.03172
			0.03204
			0.03214
			0.03216
			0.03219
			0.03275
			0.03286
			0.03299
			0.03315
			0.03441
			0.03514
			0.03524
			0.03565
			0.03591
			0.0369
			0.0371
			0.03758
			0.03771
			0.03807
			0.03811
			0.0382
			0.03882
			0.03979
			0.03983
			0.04008
			0.04051
			0.04303
			0.04337
			0.04392
			0.04763
			0.0507
			0.05222
			0.05263
