# Supplementary material for: Analysis of coastal cod (Gadus morhua L.) sampled on spawning sites reveals a genetic gradient throughout Norway’s coastline
Source: BMC Genet. 2018 Jul 9;19:42. doi: 10.1186/s12863-018-0625-8 (PMC6036686; doi:10.1186/s12863-018-0625-8)
Supplement: Supplementary file 3 — Raw data. Genotypes for Dataset 1 (66 samples genotyped at 6 microsatellites) and Dataset 2 (18 samples genotyped at 15 microsatellites). Pan I genotypes, and otolith information is provided for each individual as well. (XLSX 563 kb) [file 12863_2018_625_MOESM3_ESM.xlsx]

## Sheet: Dataset1
ID	Population	Gmo2_a	Gmo2_b	Gmo3_a	Gmo3_b	Gmo34_a	Gmo34_b	Gmo35_a	Gmo35_b	Gmo132_a	Gmo132_b	Tch11_a	Tch11_b	PanI_a	PanI_b	Otolith type
Smor_02_17	Smørfjord_2002	105	117	192	192	92	100	126	129	115	121	156	200	100	100	1
Smor_02_18	Smørfjord_2002	113	119	192	192	96	96	126	135	115	115	140	180	100	104	1
Smor_02_19	Smørfjord_2002	109	109	192	192	96	100	126	138	115	139	140	188	100	104	1
Smor_02_20	Smørfjord_2002	107	107	192	192	96	96	129	132	121	121	136	144	100	104	1
Smor_02_23	Smørfjord_2002	111	111	192	192	96	96	126	132	115	115	164	172	100	104	1
Smor_02_27	Smørfjord_2002	111	111	192	192	96	96	123	126	115	115	164	172	100	104	2
Smor_02_28	Smørfjord_2002	109	117	192	192	84	84	126	135	115	115	172	176	100	100	2
Smor_02_29	Smørfjord_2002	107	121	192	192	96	96	123	126	115	121	164	176	100	100	2
Smor_02_30	Smørfjord_2002	107	113	192	192	96	96	129	138	119	121	152	176	100	100	2
Smor_02_32	Smørfjord_2002	113	113	192	192	96	96	123	126	115	145	164	180	100	100	2
Smor_02_34	Smørfjord_2002	115	141	192	192	96	100	123	123	115	143	156	192	100	104	1
Smor_02_37	Smørfjord_2002	113	113	192	192	96	96	123	132	119	135	156	176	100	100	2
Smor_02_39	Smørfjord_2002	109	109	192	192	92	96	123	126	115	117	172	172	100	100	1
Smor_02_41	Smørfjord_2002	107	129	192	192	92	96	123	126	115	119	140	152	100	100	2
Smor_02_42	Smørfjord_2002	111	113	192	192	96	108	126	132	117	129	160	172	100	100	1
Smor_02_43	Smørfjord_2002	109	121	192	192	96	96	123	123	115	121	168	176	100	104	1
Smor_02_44	Smørfjord_2002	111	113	192	192	96	96	135	138	115	119	168	172	100	104	1
Smor_02_45	Smørfjord_2002	113	115	192	192	96	100	129	138	115	133	152	180	100	100	1
Smor_02_47	Smørfjord_2002	119	119	192	192	92	96	132	135	115	115	128	180	100	104	2
Smor_02_50	Smørfjord_2002	107	141	192	192	92	96	129	135	115	117	144	176	100	100	1
Smor_02_51	Smørfjord_2002	105	109	192	192	96	96	123	129	115	117	152	168	100	100	1
Smor_02_53	Smørfjord_2002	105	133	184	192	96	100	135	135	115	137	180	180	100	104	1
Smor_02_54	Smørfjord_2002	121	141	192	192	96	108	132	135	117	135	124	180	100	100	2
Smor_02_60	Smørfjord_2002	107	107	192	192	92	96	129	135	115	133	180	180	100	100	1
Smor_02_62	Smørfjord_2002	115	115	192	192	96	96	126	138	115	135	156	164	100	100	1
Smor_02_67	Smørfjord_2002	107	113	192	192	92	108	135	135	115	115	160	180	100	100	2
Smor_02_74	Smørfjord_2002	105	141	192	192	96	96	132	132	119	121	152	192	100	100	1
Smor_02_75	Smørfjord_2002	109	111	192	192	96	96	132	141	115	115	168	184	100	100	1
Smor_02_76	Smørfjord_2002	107	121	192	192	92	96	126	135	115	125	176	176	100	100	1
Smor_02_77	Smørfjord_2002	107	117	192	192	92	112	132	135	115	115	172	204	100	100	2
Smor_02_78	Smørfjord_2002	119	119	192	192	104	112	129	135	115	115	184	192	100	100	2
Smor_02_80	Smørfjord_2002	109	115	188	192	96	96	126	126	115	115	156	184	100	100	1
Smor_02_81	Smørfjord_2002	113	113	192	196	96	100	126	126	115	129	156	168	100	104	1
Smor_02_82	Smørfjord_2002	111	117	192	192	96	100	126	138	115	115	156	172	100	100	1
Smor_02_83	Smørfjord_2002	113	113	192	192	108	112	132	147	115	121	188	192	100	100	1
Smor_02_84	Smørfjord_2002	107	113	192	192	96	96	126	132	119	137	188	188	100	104	1
Smor_02_85	Smørfjord_2002	109	113	192	196	96	96	129	135	115	115	172	188	100	100	1
Smor_02_86	Smørfjord_2002	119	121	192	192	96	96	129	129	115	139	160	172	100	100	1
Smor_02_87	Smørfjord_2002	107	117	188	192	96	100	126	129	115	119	160	172	100	100	1
Smor_02_89	Smørfjord_2002	111	113	192	192	96	96	132	138	115	115	188	192	100	100	1
Smor_02_90	Smørfjord_2002	115	115	192	192	96	100	132	135	119	145	172	188	100	104	1
Smor_02_91	Smørfjord_2002	107	111	192	192	92	112	126	135	115	169	156	180	100	104	1
Smor_02_92	Smørfjord_2002	109	111	192	192	96	96	138	141	113	115	172	184	100	100	1
Smor_02_93	Smørfjord_2002	107	109	192	196	96	100	123	132	135	139	156	180	100	100	1
Smor_02_95	Smørfjord_2002	117	117	192	192	96	104	129	132	115	131	176	176	100	100	1
Smor_02_97	Smørfjord_2002	105	113	192	192	96	104	126	126	115	119	172	188	100	104	1
Smor_02_98	Smørfjord_2002	105	107	192	192	96	96	129	132	115	115	196	196	100	100	2
Smor_02_99	Smørfjord_2002	105	109	192	192	96	96	129	147	117	119	156	192	100	104	2
Smor_02_100	Smørfjord_2002	107	107	192	196	96	96	129	129	119	145	184	184	100	104	2
Smor_02_101	Smørfjord_2002	111	111	192	192	96	104	123	147	121	143	160	172	100	104	1
Smor_02_102	Smørfjord_2002	107	107	192	192	96	104	123	129	115	117	180	180	100	104	1
Smor_02_103	Smørfjord_2002	111	113	192	192	88	96	129	129	115	139	160	172	100	100	1
Smor_02_104	Smørfjord_2002	105	105	192	192	96	96	132	135	115	115	148	172	100	104	1
Smor_02_105	Smørfjord_2002	107	115	192	192	96	96	123	126	115	115	148	184	100	100	1
Smor_02_106	Smørfjord_2002	113	119	192	192	96	100	126	135	115	115	156	176	100	100	1
Smor_02_107	Smørfjord_2002	109	113	192	192	96	100	129	132	125	141	184	212	100	100	1
Smor_02_108	Smørfjord_2002	113	113	192	192	84	96	126	132	119	123	160	192	100	100	1
Smor_02_109	Smørfjord_2002	109	109	192	192	92	96	129	138	141	159	148	176	100	100	1
Smor_02_110	Smørfjord_2002	107	107	192	192	100	100	135	135	115	115	160	184	100	104	1
Mag_02_02	Magerøysundet_2002	109	109	192	192	92	96	126	141	115	115	168	168	100	100	2
Mag_02_05	Magerøysundet_2002	111	113	192	192	96	96	132	135	115	119	144	180	100	100	1
Mag_02_06	Magerøysundet_2002	113	113	192	192	96	96	135	138	115	115	188	188	100	104	2
Mag_02_08	Magerøysundet_2002	111	111	192	192	100	100	132	141	115	115	188	192	100	104	1
Mag_02_11	Magerøysundet_2002	119	121	192	192	96	100	132	135	115	115	156	160	100	100	1
Mag_02_12	Magerøysundet_2002	111	113	192	192	96	96	129	132	115	115	172	172	100	100	1
Mag_02_15	Magerøysundet_2002	107	107	192	192	100	104	132	135	117	131	156	196	100	100	2
Mag_02_16	Magerøysundet_2002	109	115	192	192	96	108	129	135	115	135	148	184	100	100	1
Mag_02_17	Magerøysundet_2002	113	113	192	192	96	96	129	129	115	119	156	160	100	104	2
Mag_02_19	Magerøysundet_2002	107	107	192	192	96	96	126	126	115	119	144	172	100	100	2
Mag_02_20	Magerøysundet_2002	109	113	192	192	96	96	126	135	115	125	172	184	100	100	2
Mag_02_21	Magerøysundet_2002	107	107	192	192	96	96	126	129	115	115	176	196	100	100	1
Mag_02_22	Magerøysundet_2002	111	119	192	192	96	96	126	138	119	125	184	212	100	104	1
Mag_02_23	Magerøysundet_2002	107	107	192	192	96	96	126	132	115	115	192	204	100	100	1
Mag_02_24	Magerøysundet_2002	111	113	192	192	92	96	135	135	115	123	168	200	100	104	1
Mag_02_26	Magerøysundet_2002	113	145	192	192	92	96	126	138	115	133	172	200	100	104	1
Mag_02_27	Magerøysundet_2002	107	113	192	192	92	108	126	129	115	115	140	208	104	104	1
Mag_02_28	Magerøysundet_2002	107	115	192	192	96	96	135	138	115	115	172	196	104	104	1
Mag_02_30	Magerøysundet_2002	107	107	192	192	92	96	126	138	123	137	164	180	100	104	1
Mag_02_32	Magerøysundet_2002	107	107	192	192	96	104	132	135	115	115	160	184	100	100	1
Mag_02_33	Magerøysundet_2002	105	113	192	192	92	96	126	138	115	117	148	184	100	100	1
Mag_02_34	Magerøysundet_2002	113	113	192	192	92	96	123	135	115	139	148	184	100	100	1
Mag_02_35	Magerøysundet_2002	113	113	192	192	96	96	126	138	115	135	148	200	100	100	1
Mag_02_36	Magerøysundet_2002	109	115	192	192	96	96	120	120	115	115	168	188	100	100	1
Mag_02_37	Magerøysundet_2002	105	113	192	192	92	96	129	138	115	143	184	184	100	100	1
Mag_02_38	Magerøysundet_2002	109	117	192	192	96	96	129	132	115	115	172	196	104	104	2
Mag_02_41	Magerøysundet_2002	105	113	192	192	92	96	126	138	115	115	148	184	100	104	2
Mag_02_42	Magerøysundet_2002	107	125	192	192	96	96	123	135	115	119	168	200	100	104	1
Mag_02_43	Magerøysundet_2002	113	113	192	192	92	104	123	126	115	115	160	188	100	100	2
Mag_02_45	Magerøysundet_2002	107	119	192	192	92	96	132	141	115	115	168	176	100	104	2
Mag_02_46	Magerøysundet_2002	109	117	192	192	96	96	129	135	115	115	168	176	100	100	1
Mag_02_47	Magerøysundet_2002	107	109	192	192	92	96	129	129	115	115	176	200	100	100	2
Mag_02_48	Magerøysundet_2002	107	125	192	192	96	100	126	135	115	117	164	196	104	104	1
Mag_02_49	Magerøysundet_2002	113	119	192	192	96	96	123	129	115	135	168	168	100	100	1
Mag_02_51	Magerøysundet_2002	105	111	192	192	96	96	129	129	115	133	160	164	104	104	1
Mag_02_52	Magerøysundet_2002	107	107	192	192	92	112	126	129	119	121	168	192	104	104	1
Mag_02_53	Magerøysundet_2002	105	117	192	192	96	96	126	132	115	115	128	180	100	100	1
Mag_02_54	Magerøysundet_2002	111	111	192	192	96	96	126	129	115	147	152	156	100	104	2
Mag_02_56	Magerøysundet_2002	117	117	192	192	96	96	126	129	115	115	128	176	100	104	1
Mag_02_58	Magerøysundet_2002	107	111	192	192	96	96	129	135	115	127	192	208	100	100	1
Mag_02_59	Magerøysundet_2002	113	133	192	192	96	96	138	138	115	137	160	180	100	100	1
Mag_02_60	Magerøysundet_2002	107	107	192	196	96	96	129	141	115	117	204	204	104	104	2
Mag_02_61	Magerøysundet_2002	107	107	192	192	96	100	126	129	115	115	156	184	100	100	2
Mag_02_62	Magerøysundet_2002	113	117	192	192	96	96	126	132	133	137	156	160	100	100	1
Mag_02_64	Magerøysundet_2002	107	117	192	192	96	96	126	129	115	115	172	180	104	104	2
Mag_02_65	Magerøysundet_2002	105	107	180	192	96	100	126	126	115	115	192	220	100	104	1
Mag_02_66	Magerøysundet_2002	109	109	192	196	96	96	129	129	115	115	140	156	100	100	1
Mag_02_67	Magerøysundet_2002	109	131	192	196	96	104	126	132	115	115	176	188	100	104	1
Mag_02_69	Magerøysundet_2002	107	109	192	192	92	96	129	138	115	119	140	180	100	100	1
Mag_02_70	Magerøysundet_2002	113	119	192	192	96	96	123	135	115	121	204	204	100	104	1
Mag_02_71	Magerøysundet_2002	117	121	192	192	96	96	126	126	115	119	164	164	100	104	1
Mag_02_72	Magerøysundet_2002	107	119	192	192	96	96	123	126	115	145	180	184	100	100	1
Mag_02_74	Magerøysundet_2002	111	119	192	192	96	104	126	132	119	125	144	160	100	100	1
Mag_02_75	Magerøysundet_2002	113	113	192	192	96	96	135	138	115	115	164	188	100	100	1
Mag_02_77	Magerøysundet_2002	111	113	192	192	96	96	126	138	117	119	176	200	100	104	1
Mag_02_78	Magerøysundet_2002	107	111	192	192	92	96	129	138	115	115	192	200	100	100	1
Mag_02_79	Magerøysundet_2002	105	107	192	192	96	96	126	135	115	115	184	196	100	100	1
Mag_02_80	Magerøysundet_2002	109	113	192	192	88	96	126	135	115	133	144	188	100	104	1
Mag_02_81	Magerøysundet_2002	107	113	192	192	96	96	132	132	115	119	144	184	100	100	1
Mag_02_82	Magerøysundet_2002	119	125	192	192	96	96	135	138	115	115	140	172	100	100	2
Mag_02_83	Magerøysundet_2002	109	119	192	192	96	96	129	132	115	115	172	176	100	104	1
Mag_02_85	Magerøysundet_2002	113	115	192	192	96	96	129	135	115	115	168	184	104	104	2
Mag_02_86	Magerøysundet_2002	109	117	192	192	96	96	123	129	115	125	168	208	100	100	1
Mag_02_90	Magerøysundet_2002	105	115	192	192	96	100	129	132	115	115	132	172	100	104	1
Mag_02_91	Magerøysundet_2002	109	119	192	192	96	96	126	126	115	119	164	196	100	100	1
Mag_02_92	Magerøysundet_2002	107	111	192	192	96	112	129	141	115	121	156	168	100	100	1
Mag_02_93	Magerøysundet_2002	109	119	192	192	96	96	126	135	115	115	152	184	100	100	1
Mag_02_94	Magerøysundet_2002	107	107	188	192	96	100	123	129	115	135	176	184	100	100	1
Mag_02_96	Magerøysundet_2002	111	111	192	192	92	108	129	132	115	125	152	192	100	100	1
Bals_02_01	Balsfjord_2002	111	141	192	192	92	96	126	150	115	115	192	192	100	100	1
Bals_02_02	Balsfjord_2002	105	105	192	192	96	96	123	129	115	119	144	172	100	100	1
Bals_02_03	Balsfjord_2002	109	113	192	192	92	96	126	129	127	137	160	160	100	100	1
Bals_02_04	Balsfjord_2002	119	119	192	192	100	104	129	135	117	141	168	176	100	100	1
Bals_02_05	Balsfjord_2002	105	121	192	192	96	96	126	129	115	117	164	172	100	104	2
Bals_02_09	Balsfjord_2002	107	119	180	192	96	96	129	135	115	115	172	184	100	104	1
Bals_02_10	Balsfjord_2002	113	119	192	196	96	96	123	126	115	119	140	192	100	100	1
Bals_02_11	Balsfjord_2002	107	107	192	192	96	96	135	141	115	135	164	172	100	100	2
Bals_02_12	Balsfjord_2002	111	115	192	192	96	96	135	138	115	121	168	184	100	100	1
Bals_02_13	Balsfjord_2002	113	121	192	192	96	96	126	129	115	115	172	184	100	100	1
Bals_02_14	Balsfjord_2002	113	115	188	192	96	96	132	135	115	115	172	172	104	104	2
Bals_02_15	Balsfjord_2002	119	119	192	192	96	96	129	129	115	115	168	196	100	100	1
Bals_02_16	Balsfjord_2002	107	119	192	192	92	104	126	129	115	155	176	184	100	100	1
Bals_02_18	Balsfjord_2002	119	119	192	192	96	96	126	132	115	125	172	172	104	104	2
Bals_02_19	Balsfjord_2002	107	117	192	196	96	108	129	132	115	115	160	184	100	100	1
Bals_02_20	Balsfjord_2002	113	117	192	192	96	100	126	129	115	119	168	212	100	100	2
Bals_02_21	Balsfjord_2002	109	109	188	192	96	100	123	141	115	145	164	180	100	100	1
Bals_02_23	Balsfjord_2002	115	115	192	196	96	100	126	126	115	145	164	176	100	100	1
Bals_02_24	Balsfjord_2002	119	119	192	196	96	96	129	132	115	117	156	196	100	104	1
Bals_02_26	Balsfjord_2002	119	143	192	192	96	96	126	129	115	159	160	168	100	104	1
Bals_02_27	Balsfjord_2002	107	111	192	192	92	96	123	126	121	159	160	180	100	100	1
Bals_02_28	Balsfjord_2002	107	109	188	188	96	96	129	132	121	125	172	172	100	100	2
Bals_02_29	Balsfjord_2002	115	117	192	192	92	104	126	132	115	115	176	176	100	100	1
Bals_02_30	Balsfjord_2002	107	107	192	192	96	100	123	132	115	119	188	204	100	100	1
Bals_02_31	Balsfjord_2002	119	119	192	192	100	100	129	135	115	117	176	176	100	100	1
Bals_02_32	Balsfjord_2002	107	113	192	192	96	100	129	132	115	115	176	176	100	100	1
Bals_02_35	Balsfjord_2002	111	113	192	192	96	100	126	135	115	115	164	176	100	104	1
Bals_02_36	Balsfjord_2002	113	113	192	192	84	96	123	129	115	137	152	184	100	100	1
Bals_02_39	Balsfjord_2002	113	113	192	192	96	100	129	141	115	143	188	196	100	100	1
Bals_02_41	Balsfjord_2002	109	113	192	192	92	96	141	144	139	143	156	164	100	100	1
Bals_02_42	Balsfjord_2002	107	119	192	192	92	104	129	138	119	137	156	204	100	100	1
Bals_02_43	Balsfjord_2002	107	113	180	192	92	96	132	132	115	139	164	176	100	100	1
Bals_02_45	Balsfjord_2002	113	113	192	192	96	104	129	141	115	119	164	172	100	100	1
Bals_02_46	Balsfjord_2002	107	113	192	192	96	104	126	141	115	147	168	180	100	100	1
Bals_02_47	Balsfjord_2002	111	119	192	208	104	104	123	135	115	115	188	196	100	100	1
Bals_02_48	Balsfjord_2002	119	119	192	192	96	96	123	135	115	119	156	176	100	104	1
Bals_02_49	Balsfjord_2002	107	113	192	192	96	108	123	126	115	121	172	200	100	100	1
Bals_02_50	Balsfjord_2002	105	119	192	192	96	96	123	141	115	115	156	208	100	100	1
Bals_02_51	Balsfjord_2002	107	115	192	192	96	100	129	132	115	115	148	200	100	100	2
Bals_02_54	Balsfjord_2002	105	113	192	196	96	96	132	132	115	119	144	144	100	104	1
Bals_02_58	Balsfjord_2002	107	107	192	192	92	96	126	141	115	143	172	176	100	100	1
Bals_02_59	Balsfjord_2002	107	119	192	192	96	104	126	132	115	121	176	176	100	100	1
Bals_02_60	Balsfjord_2002	109	113	192	196	96	96	129	129	123	125	168	184	100	100	1
Bals_02_61	Balsfjord_2002	113	119	192	192	96	96	129	135	145	145	156	160	100	100	1
Bals_02_62	Balsfjord_2002	107	119	168	192	96	100	129	129	115	119	156	168	100	104	1
Bals_02_63	Balsfjord_2002	111	117	192	192	96	96	126	129	117	139	184	200	100	100	1
Bals_02_66	Balsfjord_2002	107	109	192	192	96	96	123	126	115	115	172	184	100	104	2
Bals_02_68	Balsfjord_2002	109	109	192	192	96	96	126	132	115	115	212	212	100	104	1
Bals_02_69	Balsfjord_2002	105	105	192	192	96	100	123	135	115	115	160	180	100	100	1
Bals_02_70	Balsfjord_2002	107	107	192	192	96	96	123	126	115	129	160	184	100	100	1
Bals_02_71	Balsfjord_2002	107	117	192	192	96	100	132	147	115	115	156	192	100	100	2
Bals_02_72	Balsfjord_2002	109	109	192	192	96	96	129	141	115	141	172	172	100	100	1
Bals_02_73	Balsfjord_2002	107	107	188	192	96	96	129	132	115	115	172	180	104	104	1
Bals_02_74	Balsfjord_2002	117	121	192	192	96	96	132	138	115	115	180	188	100	104	2
Bals_02_75	Balsfjord_2002	107	113	188	192	96	96	135	135	115	119	156	176	100	100	1
Bals_02_76	Balsfjord_2002	105	113	192	192	96	100	135	138	115	131	184	200	100	100	1
Bals_02_77	Balsfjord_2002	109	117	184	192	96	112	126	138	115	129	160	184	100	100	2
Bals_02_78	Balsfjord_2002	107	113	192	192	92	104	132	138	115	117	164	184	100	100	1
Bals_02_80	Balsfjord_2002	111	111	192	192	96	100	132	138	115	137	156	188	100	100	2
Bals_02_81	Balsfjord_2002	105	109	192	192	96	96	132	132	115	119	156	172	100	100	2
Bals_02_83	Balsfjord_2002	115	115	192	192	96	104	126	147	115	131	180	208	100	100	1
Bals_02_84	Balsfjord_2002	105	109	192	192	96	96	123	141	111	115	160	196	100	104	1
Bals_02_85	Balsfjord_2002	111	111	192	192	96	96	126	126	119	121	176	192	100	104	1
Bals_02_86	Balsfjord_2002	107	139	192	192	96	100	129	138	121	145	156	180	100	104	1
Bals_02_87	Balsfjord_2002	113	113	192	192	96	104	126	138	135	159	156	180	100	100	1
Bals_02_88	Balsfjord_2002	119	119	192	192	96	104	126	132	115	119	156	192	100	104	1
Bals_02_90	Balsfjord_2002	107	107	192	192	96	96	126	138	115	141	156	164	104	104	1
Bals_02_92	Balsfjord_2002	107	121	192	192	96	96	123	123	115	119	164	184	100	100	1
Bals_02_94	Balsfjord_2002	115	115	192	192	96	96	129	132	137	141	164	200	100	100	1
Bals_02_96	Balsfjord_2002	107	119	192	192	96	96	126	135	115	119	160	160	100	104	1
Bals_02_97	Balsfjord_2002	115	115	192	192	96	104	123	132	115	115	160	168	100	100	2
Bals_02_98	Balsfjord_2002	107	113	192	192	92	96	129	147	137	143	160	200	100	100	1
Bals_02_99	Balsfjord_2002	105	113	192	192	96	96	129	132	115	115	184	192	100	104	1
Bals_02_100	Balsfjord_2002	107	111	192	192	96	96	132	135	115	125	160	168	100	100	1
Bals_02_102	Balsfjord_2002	107	119	192	192	96	100	135	138	129	135	144	168	100	100	1
Bals_02_103	Balsfjord_2002	107	113	192	192	92	96	126	138	121	133	164	168	100	100	1
Bals_02_105	Balsfjord_2002	113	113	192	192	100	104	129	141	115	137	160	160	100	100	2
Bals_02_106	Balsfjord_2002	107	113	192	192	96	112	132	138	115	159	180	196	100	100	2
Bals_02_107	Balsfjord_2002	119	119	192	192	92	96	123	135	115	125	184	192	100	100	1
Bals_02_108	Balsfjord_2002	107	115	192	192	92	96	123	132	115	125	176	184	100	100	1
Bals_02_110	Balsfjord_2002	107	115	192	196	96	96	129	132	115	115	160	200	104	104	2
Bals_02_112	Balsfjord_2002	119	119	192	192	96	100	126	129	115	117	164	168	100	104	1
Bals_02_114	Balsfjord_2002	113	119	192	192	96	112	126	132	133	207	164	172	100	100	1
Bals_02_115	Balsfjord_2002	107	119	192	192	96	96	129	132	115	119	212	212	100	100	1
Bals_02_116	Balsfjord_2002	107	107	192	196	96	100	126	138	119	135	156	160	100	100	1
Bals_02_118	Balsfjord_2002	109	113	188	192	96	96	132	138	115	117	180	196	100	104	1
Bals_02_119	Balsfjord_2002	119	119	192	192	96	96	126	135	115	155	164	164	100	104	1
Bals_02_120	Balsfjord_2002	107	107	192	208	96	96	129	147	117	135	160	200	100	100	2
Bals_02_121	Balsfjord_2002	113	113	192	192	96	100	123	132	125	133	144	184	100	100	1
Bals_02_122	Balsfjord_2002	115	119	192	192	96	100	135	138	115	119	172	176	100	100	1
Bals_02_123	Balsfjord_2002	109	121	192	196	96	100	129	129	115	119	156	176	100	100	2
Bals_02_124	Balsfjord_2002	109	109	192	192	92	96	132	135	115	137	160	164	100	100	1
Bals_02_126	Balsfjord_2002	113	117	192	192	96	104	129	129	119	157	156	160	100	100	1
Bals_02_127	Balsfjord_2002	109	109	192	192	96	96	126	132	115	149	168	172	100	100	1
Tyss_02_03	Stefjord_2002	107	113	192	192	96	104	126	126	157	159	156	176	100	100	2
Tyss_02_04	Stefjord_2002	105	105	192	192	96	96	129	135	117	117	176	176	100	104	1
Tyss_02_05	Stefjord_2002	111	113	192	192	100	100	126	126	125	141	144	148	100	100	2
Tyss_02_06	Stefjord_2002	107	107	192	192	96	100	126	126	115	115	140	172	100	104	2
Tyss_02_07	Stefjord_2002	107	109	192	192	96	104	126	138	115	157	152	192	100	104	1
Tyss_02_09	Stefjord_2002	113	117	184	192	96	96	123	129	115	129	128	196	100	100	1
Tyss_02_12	Stefjord_2002	107	119	192	196	100	104	126	132	115	131	176	188	100	100	1
Tyss_02_14	Stefjord_2002	109	111	192	192	96	96	129	132	115	123	184	188	100	104	1
Tyss_02_15	Stefjord_2002	113	119	192	192	92	96	126	126	115	115	168	172	100	104	2
Tyss_02_16	Stefjord_2002	107	113	192	192	92	100	126	147	115	139	164	180	100	100	1
Tyss_02_17	Stefjord_2002	113	119	192	192	92	92	126	129	119	137	176	192	100	100	1
Tyss_02_18	Stefjord_2002	107	107	192	192	96	96	129	132	115	135	188	188	100	104	2
Tyss_02_20	Stefjord_2002	113	119	192	192	96	96	129	129	115	117	180	180	100	100	2
Tyss_02_22	Stefjord_2002	109	113	192	192	96	96	126	141	115	115	160	196	100	100	1
Tyss_02_23	Stefjord_2002	111	115	192	192	96	96	132	141	135	151	216	216	100	100	1
Tyss_02_24	Stefjord_2002	107	121	192	192	96	96	129	132	133	141	160	176	100	104	1
Tyss_02_25	Stefjord_2002	113	119	192	192	96	96	126	132	115	121	184	196	104	104	1
Tyss_02_26	Stefjord_2002	113	141	192	192	96	96	126	132	115	129	204	204	100	100	1
Tyss_02_27	Stefjord_2002	105	109	192	192	96	100	132	135	117	151	160	180	100	104	1
Tyss_02_28	Stefjord_2002	111	119	192	192	96	96	126	138	115	155	172	200	100	104	1
Tyss_02_29	Stefjord_2002	107	109	192	196	96	96	126	129	121	145	156	160	100	100	1
Tyss_02_30	Stefjord_2002	107	113	184	192	92	96	123	129	115	115	192	208	100	100	1
Tyss_02_31	Stefjord_2002	105	105	192	192	100	104	132	132	115	139	176	188	100	100	1
Tyss_02_32	Stefjord_2002	109	119	192	192	92	104	129	135	139	139	176	180	100	100	1
Tyss_02_34	Stefjord_2002	113	121	192	192	96	100	132	138	125	145	176	192	100	100	2
Tyss_02_35	Stefjord_2002	113	115	192	192	96	100	126	129	115	141	160	172	100	100	1
Tyss_02_36	Stefjord_2002	105	105	192	192	96	100	129	129	115	155	160	160	100	100	1
Tyss_02_37	Stefjord_2002	107	107	192	192	96	100	123	138	115	135	160	184	100	100	1
Tyss_02_38	Stefjord_2002	107	111	192	192	92	112	123	129	115	137	164	196	100	100	2
Tyss_02_39	Stefjord_2002	111	115	192	192	96	96	126	138	115	117	172	180	100	100	2
Tyss_02_40	Stefjord_2002	113	119	192	192	88	96	129	135	115	125	144	192	100	100	1
Tyss_02_41	Stefjord_2002	107	111	192	192	100	100	129	132	115	125	164	184	100	100	1
Tyss_02_42	Stefjord_2002	109	115	192	192	96	104	126	132	115	125	168	176	100	104	1
Tyss_02_43	Stefjord_2002	105	109	192	192	92	96	129	135	119	127	144	172	100	100	1
Tyss_02_44	Stefjord_2002	107	115	196	196	96	108	123	126	117	137	160	200	100	100	1
Tyss_02_46	Stefjord_2002	105	107	188	192	92	96	123	126	115	141	160	168	100	100	1
Tyss_02_47	Stefjord_2002	109	109	192	192	96	96	126	132	115	115	204	204	100	104	1
Tyss_02_48	Stefjord_2002	109	117	192	192	92	100	126	126	115	115	184	184	100	100	1
Tyss_02_49	Stefjord_2002	109	113	192	192	96	100	126	129	115	115	156	160	100	104	1
Tyss_02_50	Stefjord_2002	109	111	192	192	96	108	123	138	139	167	184	200	100	100	1
Tyss_02_51	Stefjord_2002	107	107	192	192	96	96	126	129	115	139	168	168	100	104	1
Tyss_02_52	Stefjord_2002	109	117	192	192	100	100	129	129	115	115	160	192	100	100	1
Tyss_02_53	Stefjord_2002	109	113	188	192	96	96	126	126	137	141	164	164	100	100	1
Tyss_02_54	Stefjord_2002	107	107	188	196	96	96	123	135	115	115	176	176	100	100	1
Tyss_02_55	Stefjord_2002	109	109	188	192	96	96	129	132	129	137	164	164	100	100	1
Tyss_02_56	Stefjord_2002	111	113	180	192	92	100	129	132	115	145	160	168	100	100	1
Tyss_02_58	Stefjord_2002	113	113	192	192	92	100	123	129	115	147	156	200	100	100	1
Tyss_02_59	Stefjord_2002	111	111	192	192	84	96	126	126	115	115	156	156	100	100	1
Tyss_02_60	Stefjord_2002	107	113	192	192	96	96	129	135	115	157	140	176	100	104	1
Tyss_02_61	Stefjord_2002	113	113	192	196	92	96	126	129	115	137	152	192	100	100	1
Tyss_02_62	Stefjord_2002	115	117	192	192	96	100	126	135	115	129	140	160	100	100	1
Tyss_02_63	Stefjord_2002	107	115	192	196	96	100	126	135	115	139	140	160	100	104	1
Vega_02_01	Vega_2002	107	107	192	192	92	96	126	135	115	139	128	180	100	100	1
Vega_02_02	Vega_2002	107	119	192	196	96	96	126	129	129	135	156	172	100	100	2
Vega_02_03	Vega_2002	109	115	192	192	96	96	126	132	115	153	180	204	100	100	1
Vega_02_04	Vega_2002	107	113	188	188	92	96	120	129	115	115	128	188	100	104	1
Vega_02_05	Vega_2002	109	115	192	196	88	92	123	132	145	155	156	172	100	100	1
Vega_02_06	Vega_2002	107	117	192	192	96	100	135	138	115	115	172	180	100	104	1
Vega_02_07	Vega_2002	111	111	188	192	92	96	129	135	115	139	172	180	100	100	1
Vega_02_08	Vega_2002	107	119	188	192	84	100	123	126	99	115	160	196	100	100	1
Vega_02_09	Vega_2002	105	107	192	192	92	96	126	129	129	137	172	192	100	100	1
Vega_02_10	Vega_2002	107	133	192	192	96	104	123	126	135	139	160	192	100	100	1
Vega_02_11	Vega_2002	113	113	192	192	92	104	138	138	125	157	172	184	100	100	1
Vega_02_12	Vega_2002	111	111	192	192	92	100	132	138	115	115	168	168	100	100	1
Vega_02_14	Vega_2002	107	107	192	192	92	96	126	129	137	141	156	204	100	100	1
Vega_02_17	Vega_2002	107	107	192	192	96	96	129	141	131	135	160	168	100	100	1
Vega_02_18	Vega_2002	111	113	192	196	100	112	129	129	115	133	140	184	100	100	1
Vega_02_19	Vega_2002	107	117	192	192	92	92	129	132	115	131	160	172	100	100	1
Vega_02_21	Vega_2002	111	113	192	192	96	112	126	129	133	137	168	204	100	100	2
Vega_02_22	Vega_2002	113	113	192	192	84	96	132	135	115	119	160	188	100	100	1
Vega_02_26	Vega_2002	107	117	192	192	96	96	129	138	121	125	180	212	100	100	2
Vega_02_27	Vega_2002	107	119	192	192	96	100	126	126	125	133	180	196	100	100	1
Vega_02_28	Vega_2002	107	107	192	192	96	104	129	135	115	125	164	184	100	100	2
Vega_02_29	Vega_2002	107	115	192	196	104	104	129	132	115	127	172	188	100	100	1
Vega_02_30	Vega_2002	107	107	192	192	96	96	129	132	115	115	160	192	100	100	2
Vega_02_32	Vega_2002	107	113	192	192	96	96	126	126	115	145	176	176	100	104	1
Vega_02_33	Vega_2002	117	119	192	192	96	100	135	141	115	115	184	192	100	100	1
Vega_02_34	Vega_2002	107	109	192	192	96	96	135	141	115	137	172	172	100	104	1
Vega_02_35	Vega_2002	115	115	192	192	92	96	123	126	115	153	176	200	100	100	1
Vega_02_37	Vega_2002	107	113	192	192	96	96	123	123	115	145	148	196	100	104	1
Vega_02_38	Vega_2002	105	107	192	192	96	100	129	138	115	127	184	192	100	104	2
Vega_02_39	Vega_2002	113	119	192	192	96	96	132	138	115	139	176	176	100	104	2
Vega_02_41	Vega_2002	107	107	192	192	96	100	123	126	119	137	172	180	100	100	1
Vega_02_42	Vega_2002	119	119	192	192	92	96	123	138	115	115	172	176	100	104	1
Vega_02_43	Vega_2002	107	107	192	192	96	96	132	141	115	133	152	160	100	100	1
Vega_02_46	Vega_2002	113	113	196	196	96	96	129	132	115	115	176	184	100	100	1
Vega_02_51	Vega_2002	109	113	188	192	96	100	129	141	133	137	188	192	100	104	1
Vega_02_52	Vega_2002	109	109	192	192	96	100	126	138	115	115	184	184	100	100	1
Vega_02_53	Vega_2002	107	107	192	192	96	96	126	138	115	161	144	184	100	100	1
Vega_02_54	Vega_2002	105	105	192	192	92	100	126	126	115	147	156	196	100	100	1
Aus_02_10	Austnesfjord_2002	117	117	196	196	96	100	123	129	135	139	156	180	100	100	1
Aus_02_11	Austnesfjord_2002	105	113	168	192	96	96	135	141	115	135	180	184	100	100	1
Aus_02_14	Austnesfjord_2002	107	113	192	192	96	100	126	129	115	139	160	180	100	100	1
Aus_02_16	Austnesfjord_2002	119	119	192	196	92	96	123	126	115	119	152	188	100	100	1
Aus_02_17	Austnesfjord_2002	113	115	192	192	100	100	126	135	115	139	188	192	100	100	1
Aus_02_18	Austnesfjord_2002	111	111	192	192	96	100	123	126	115	139	172	172	100	100	1
Aus_02_20	Austnesfjord_2002	109	111	192	192	96	100	129	138	115	115	144	156	100	100	1
Aus_02_23	Austnesfjord_2002	115	115	192	192	96	96	126	129	115	139	180	192	100	100	1
Aus_02_24	Austnesfjord_2002	107	107	192	192	92	96	126	129	115	151	148	184	100	100	1
Aus_02_27	Austnesfjord_2002	105	105	192	192	96	96	126	141	117	145	172	172	100	100	1
Aus_02_28	Austnesfjord_2002	113	113	192	192	96	100	135	138	115	115	140	156	100	100	2
Aus_02_29	Austnesfjord_2002	111	115	192	192	96	100	129	135	119	159	172	176	100	100	1
Aus_02_31	Austnesfjord_2002	105	107	192	192	96	100	126	129	139	143	152	156	100	100	1
Aus_02_33	Austnesfjord_2002	109	115	192	192	96	96	129	132	137	145	156	180	100	100	1
Aus_02_35	Austnesfjord_2002	109	119	192	192	100	100	123	138	141	149	156	160	100	100	1
Aus_02_36	Austnesfjord_2002	111	119	192	192	96	112	129	132	115	115	148	164	100	100	2
Aus_02_38	Austnesfjord_2002	109	119	192	192	84	96	123	126	115	135	152	188	100	100	1
Aus_02_39	Austnesfjord_2002	105	107	192	192	96	108	132	141	115	125	168	180	100	104	1
Aus_02_41	Austnesfjord_2002	105	115	192	192	96	104	132	138	131	143	160	164	100	100	1
Aus_02_42	Austnesfjord_2002	107	109	192	192	96	96	129	138	115	119	172	176	100	100	1
Aus_02_44	Austnesfjord_2002	107	123	192	192	96	104	123	126	115	115	160	180	100	104	1
Aus_02_50	Austnesfjord_2002	105	115	192	192	96	104	126	132	133	133	156	164	100	104	1
Aus_02_51	Austnesfjord_2002	115	115	192	196	96	100	126	135	115	141	152	176	100	100	1
Aus_02_54	Austnesfjord_2002	107	119	192	192	96	96	135	135	117	125	168	184	100	104	2
Aus_02_55	Austnesfjord_2002	105	113	192	192	92	104	135	135	125	133	148	188	100	100	1
Aus_02_56	Austnesfjord_2002	115	117	192	192	96	96	132	135	115	139	164	180	100	100	1
Aus_02_57	Austnesfjord_2002	119	119	192	192	96	96	129	135	115	139	148	172	100	100	1
Aus_02_58	Austnesfjord_2002	105	113	192	192	92	96	129	138	115	115	164	180	100	100	1
Aus_02_59	Austnesfjord_2002	111	111	192	192	96	96	126	126	119	119	156	180	100	104	1
Aus_02_60	Austnesfjord_2002	109	109	192	192	92	104	126	141	115	143	188	192	100	100	1
Aus_02_62	Austnesfjord_2002	115	119	188	192	92	96	129	132	115	125	168	180	100	104	2
Aus_02_64	Austnesfjord_2002	107	113	192	192	96	112	126	126	139	155	156	204	100	104	1
Aus_02_66	Austnesfjord_2002	113	119	188	192	92	96	132	138	115	115	156	196	100	100	1
Aus_02_67	Austnesfjord_2002	105	115	192	192	92	96	129	129	115	131	180	184	100	100	1
Aus_02_68	Austnesfjord_2002	117	119	192	192	96	112	129	132	115	141	176	200	100	104	1
Aus_02_69	Austnesfjord_2002	111	113	192	192	96	104	132	135	115	153	180	184	100	100	1
Aus_02_70	Austnesfjord_2002	113	117	188	192	100	100	126	135	115	137	168	172	100	100	1
Aus_02_71	Austnesfjord_2002	107	113	192	192	92	96	129	141	115	129	180	192	100	104	1
Aus_02_72	Austnesfjord_2002	113	119	192	192	88	100	123	138	115	117	156	160	100	100	1
Aus_02_73	Austnesfjord_2002	109	111	192	192	96	96	126	138	143	147	176	180	100	100	1
Aus_02_74	Austnesfjord_2002	115	119	192	192	96	96	129	129	117	169	176	184	100	104	1
Aus_02_76	Austnesfjord_2002	111	113	192	192	96	96	126	126	115	115	160	176	100	100	1
Aus_02_77	Austnesfjord_2002	105	113	192	192	96	104	132	141	119	135	188	204	100	100	1
Aus_02_78	Austnesfjord_2002	107	117	192	192	96	96	126	129	115	125	148	184	100	104	1
Aus_02_79	Austnesfjord_2002	113	119	192	192	96	112	126	132	115	115	172	192	100	100	1
Smor_03_01	Smørfjord_2003	105	111	192	192	96	96	123	132	115	117	160	168	100	100	1
Smor_03_03	Smørfjord_2003	105	115	192	192	96	96	129	135	115	115	144	184	100	104	1
Smor_03_11	Smørfjord_2003	113	113	192	192	92	100	132	141	115	115	184	188	100	100	1
Smor_03_12	Smørfjord_2003	107	113	192	192	96	96	126	135	115	159	156	188	100	104	1
Smor_03_13	Smørfjord_2003	109	119	192	192	84	96	129	135	115	115	172	188	100	100	1
Smor_03_14	Smørfjord_2003	105	113	192	196	96	100	123	135	137	141	148	164	100	104	1
Smor_03_15	Smørfjord_2003	113	113	192	192	96	96	123	129	115	145	180	192	100	100	1
Smor_03_16	Smørfjord_2003	113	117	192	192	92	96	126	129	115	115	144	156	100	100	2
Smor_03_17	Smørfjord_2003	111	113	192	192	92	96	129	135	115	115	168	168	100	100	1
Smor_03_19	Smørfjord_2003	107	113	192	192	96	96	123	126	115	115	156	180	100	100	1
Smor_03_20	Smørfjord_2003	105	119	192	192	96	100	126	126	117	145	160	176	100	100	1
Smor_03_21	Smørfjord_2003	113	113	192	192	96	100	129	132	115	115	172	184	100	100	1
Smor_03_22	Smørfjord_2003	107	119	192	192	96	100	126	126	121	151	160	196	100	100	1
Smor_03_23	Smørfjord_2003	113	119	192	192	96	96	126	135	141	157	160	192	100	104	1
Smor_03_24	Smørfjord_2003	113	113	192	192	96	96	129	135	115	121	140	148	100	100	2
Smor_03_25	Smørfjord_2003	113	115	192	192	96	96	129	141	115	135	160	172	100	100	1
Smor_03_26	Smørfjord_2003	109	111	192	192	96	96	129	138	115	121	144	200	100	104	2
Smor_03_28	Smørfjord_2003	107	107	192	192	96	112	129	132	115	143	148	160	100	100	1
Smor_03_29	Smørfjord_2003	109	119	192	192	96	100	126	129	115	115	176	176	100	104	1
Smor_03_31	Smørfjord_2003	117	119	192	192	96	100	138	138	115	115	140	180	100	104	1
Smor_03_32	Smørfjord_2003	105	113	192	192	92	96	123	129	115	119	172	192	100	100	1
Smor_03_33	Smørfjord_2003	109	111	192	192	96	96	132	135	131	139	172	188	100	100	1
Smor_03_35	Smørfjord_2003	109	121	188	192	96	96	129	135	115	135	184	184	100	100	1
Smor_03_38	Smørfjord_2003	105	117	192	192	96	96	126	135	115	115	164	164	100	104	1
Smor_03_39	Smørfjord_2003	107	107	192	192	96	96	123	123	115	117	168	168	100	100	1
Smor_03_40	Smørfjord_2003	119	119	192	192	96	112	126	129	115	143	188	192	100	100	2
Smor_03_41	Smørfjord_2003	119	121	192	192	96	100	126	129	115	125	152	156	100	100	1
Smor_03_42	Smørfjord_2003	107	107	192	192	96	100	126	129	115	221	160	220	100	104	1
Smor_03_44	Smørfjord_2003	113	119	192	192	92	96	123	135	115	147	188	204	100	100	1
Smor_03_45	Smørfjord_2003	107	121	192	192	96	100	129	132	115	119	176	200	100	100	2
Smor_03_46	Smørfjord_2003	113	113	188	192	96	96	126	132	115	119	152	168	100	104	1
Smor_03_48	Smørfjord_2003	113	113	192	192	96	96	126	135	115	115	144	164	100	104	1
Smor_03_50	Smørfjord_2003	107	107	192	192	100	100	135	135	121	159	156	184	100	100	1
Smor_03_51	Smørfjord_2003	109	119	168	192	96	96	132	141	115	115	172	176	100	100	1
Smor_03_52	Smørfjord_2003	109	121	192	192	96	108	126	135	115	115	196	212	100	100	1
Smor_03_53	Smørfjord_2003	113	113	192	192	84	96	135	147	115	115	168	172	100	104	1
Smor_03_54	Smørfjord_2003	107	113	192	192	92	96	129	135	115	121	192	204	100	100	1
Smor_03_55	Smørfjord_2003	113	113	192	192	92	96	129	135	115	115	148	156	100	100	2
Smor_03_56	Smørfjord_2003	107	107	192	192	96	96	126	129	115	115	132	184	100	104	1
Smor_03_57	Smørfjord_2003	111	113	192	196	96	96	129	132	135	137	164	200	100	100	1
Smor_03_58	Smørfjord_2003	115	115	192	192	96	96	123	135	115	139	140	156	100	104	1
Smor_03_59	Smørfjord_2003	107	113	192	196	88	96	126	132	115	115	172	180	100	100	1
Smor_03_60	Smørfjord_2003	107	111	192	192	96	112	129	132	119	135	148	152	100	104	2
Smor_03_61	Smørfjord_2003	109	111	192	192	92	96	129	141	115	115	176	184	100	100	1
Smor_03_62	Smørfjord_2003	107	109	192	192	96	96	123	135	115	169	156	156	100	104	2
Smor_03_63	Smørfjord_2003	113	119	192	192	96	96	129	129	115	115	164	176	100	100	1
Smor_03_65	Smørfjord_2003	113	123	192	192	96	96	126	135	115	115	192	204	100	104	1
Smor_03_66	Smørfjord_2003	113	119	192	192	96	96	126	129	119	141	148	188	100	104	1
Smor_03_67	Smørfjord_2003	107	113	192	192	96	96	123	129	115	117	148	180	100	104	1
Smor_03_68	Smørfjord_2003	113	119	192	192	92	96	129	132	115	121	160	204	100	100	1
Smor_03_69	Smørfjord_2003	115	119	192	192	96	100	129	129	143	147	184	184	100	104	1
Smor_03_70	Smørfjord_2003	113	115	192	192	96	100	126	132	115	121	172	196	100	100	1
Smor_03_71	Smørfjord_2003	107	107	192	192	96	104	126	129	115	137	144	184	100	104	1
Smor_03_72	Smørfjord_2003	107	107	192	192	92	96	126	138	115	119	144	176	100	100	1
Smor_03_73	Smørfjord_2003	113	113	192	192	96	96	126	132	115	115	176	200	100	104	1
Smor_03_74	Smørfjord_2003	107	115	192	192	96	96	132	132	115	115	164	164	100	100	1
Smor_03_75	Smørfjord_2003	117	117	192	192	100	104	126	135	115	115	172	184	100	100	1
Smor_03_76	Smørfjord_2003	109	111	192	196	96	100	123	126	115	119	160	212	100	104	1
Smor_03_77	Smørfjord_2003	109	111	192	192	96	112	123	129	115	115	160	164	100	100	1
Smor_03_78	Smørfjord_2003	107	119	192	192	92	104	123	129	115	143	156	172	100	100	1
Smor_03_79	Smørfjord_2003	115	115	192	192	96	100	126	129	115	115	172	192	100	100	1
Smor_03_80	Smørfjord_2003	113	113	192	192	96	96	126	138	115	115	156	184	100	104	1
Smor_03_81	Smørfjord_2003	107	107	192	192	96	96	135	141	115	115	160	188	104	104	2
Smor_03_82	Smørfjord_2003	105	111	192	192	96	100	132	141	115	129	144	148	100	100	1
Smor_03_84	Smørfjord_2003	107	107	192	192	96	96	129	135	115	119	156	180	100	100	1
Smor_03_85	Smørfjord_2003	109	113	192	192	92	96	123	132	129	151	184	196	100	104	1
Smor_03_87	Smørfjord_2003	107	109	188	196	96	108	123	141	137	159	168	184	100	104	2
Smor_03_88	Smørfjord_2003	119	119	192	192	96	100	126	132	115	137	172	192	100	104	1
Smor_03_89	Smørfjord_2003	107	107	188	192	92	96	126	126	115	119	172	180	100	100	1
Smor_03_90	Smørfjord_2003	107	107	192	192	96	96	126	135	115	145	128	160	100	104	2
Smor_03_91	Smørfjord_2003	111	119	192	192	96	96	129	132	115	143	160	200	100	100	1
Smor_03_92	Smørfjord_2003	109	111	192	192	96	96	129	132	115	115	164	180	100	100	1
Smor_03_93	Smørfjord_2003	115	119	192	192	92	100	129	129	115	119	164	200	100	100	2
Smor_03_96	Smørfjord_2003	115	119	192	192	96	112	129	132	117	135	148	172	100	100	1
Repp_03_03	Repparfjord_2003	107	119	192	192	96	96	138	138	117	139	156	188	100	104	1
Repp_03_04	Repparfjord_2003	111	121	192	192	96	96	129	132	119	125	156	172	100	104	1
Repp_03_05	Repparfjord_2003	113	121	192	192	96	96	129	129	115	115	164	180	100	104	2
Repp_03_07	Repparfjord_2003	107	115	192	192	100	100	126	141	115	115	172	172	100	100	2
Repp_03_08	Repparfjord_2003	119	121	192	192	96	100	129	141	115	115	156	184	100	100	2
Repp_03_09	Repparfjord_2003	109	119	192	192	96	96	132	141	137	139	184	196	100	100	1
Repp_03_10	Repparfjord_2003	107	115	192	192	96	104	126	141	115	119	156	164	100	100	1
Repp_03_14	Repparfjord_2003	105	105	192	192	96	100	120	132	121	141	164	172	100	104	1
Repp_03_16	Repparfjord_2003	107	113	192	192	96	100	129	132	119	121	184	188	100	104	1
Repp_03_17	Repparfjord_2003	113	119	188	196	96	96	132	138	135	145	160	192	100	100	1
Repp_03_18	Repparfjord_2003	107	113	188	192	96	100	126	138	115	115	172	208	100	104	2
Repp_03_22	Repparfjord_2003	107	113	192	196	96	100	126	132	115	119	176	176	100	104	1
Repp_03_23	Repparfjord_2003	105	105	192	192	92	100	126	129	115	121	160	168	100	100	1
Repp_03_24	Repparfjord_2003	105	113	192	192	96	100	123	132	115	137	180	192	100	104	2
Repp_03_26	Repparfjord_2003	107	119	192	192	92	96	135	141	115	115	156	176	100	100	1
Repp_03_27	Repparfjord_2003	119	141	192	192	96	96	129	132	119	139	164	164	100	100	1
Repp_03_28	Repparfjord_2003	107	109	192	192	96	96	126	126	115	133	192	200	100	104	1
Repp_03_30	Repparfjord_2003	119	131	192	192	96	96	126	129	115	153	148	160	100	100	1
Repp_03_34	Repparfjord_2003	113	115	192	196	92	100	129	129	121	121	156	180	100	100	1
Repp_03_35	Repparfjord_2003	109	119	184	192	96	100	129	129	115	115	172	172	100	100	1
Repp_03_37	Repparfjord_2003	119	119	192	192	92	96	126	126	137	145	156	156	100	104	2
Repp_03_38	Repparfjord_2003	107	107	192	196	96	96	126	126	115	145	160	180	100	100	2
Repp_03_39	Repparfjord_2003	107	113	192	192	96	100	126	138	115	137	192	192	100	100	1
Repp_03_40	Repparfjord_2003	107	113	192	192	92	96	132	150	115	137	196	196	100	100	1
Repp_03_41	Repparfjord_2003	109	109	192	192	96	104	129	135	115	139	152	188	100	100	1
Repp_03_42	Repparfjord_2003	113	119	192	192	96	96	126	141	115	117	196	196	100	100	1
Repp_03_43	Repparfjord_2003	105	115	192	196	96	108	129	129	143	163	188	200	100	100	1
Repp_03_44	Repparfjord_2003	105	113	192	192	96	104	132	150	121	131	188	200	100	100	1
Repp_03_45	Repparfjord_2003	109	115	192	192	96	96	129	129	143	157	180	196	100	100	1
Repp_03_46	Repparfjord_2003	107	107	192	192	92	104	132	135	115	121	188	188	100	100	1
Repp_03_48	Repparfjord_2003	109	109	192	192	96	96	132	135	115	145	184	188	100	100	1
Repp_03_49	Repparfjord_2003	105	105	192	192	96	96	129	129	115	157	144	172	100	104	1
Repp_03_50	Repparfjord_2003	105	115	188	192	96	96	138	138	115	115	196	196	100	100	1
Repp_03_52	Repparfjord_2003	109	119	192	192	96	100	129	129	115	141	172	180	100	104	2
Repp_03_54	Repparfjord_2003	113	115	192	192	96	96	126	126	117	119	172	180	100	100	1
Repp_03_55	Repparfjord_2003	107	141	192	192	96	96	126	135	115	115	180	184	100	100	1
Repp_03_57	Repparfjord_2003	107	125	192	192	96	100	126	132	115	119	176	192	100	100	1
Repp_03_58	Repparfjord_2003	117	117	192	196	96	96	123	129	115	117	168	184	100	104	1
Repp_03_59	Repparfjord_2003	107	115	192	192	96	100	126	129	115	119	172	208	100	100	2
Repp_03_60	Repparfjord_2003	107	121	192	192	92	100	129	129	115	115	192	208	100	100	1
Repp_03_62	Repparfjord_2003	107	119	192	192	92	96	129	138	115	117	160	188	100	104	2
Repp_03_63	Repparfjord_2003	107	119	192	192	96	96	132	132	117	137	172	204	100	100	1
Repp_03_64	Repparfjord_2003	107	119	192	196	96	104	126	132	115	119	144	164	100	100	1
Repp_03_65	Repparfjord_2003	113	133	192	192	100	100	126	129	115	115	152	204	100	104	1
Repp_03_67	Repparfjord_2003	119	121	184	192	92	96	126	132	115	119	168	188	100	100	1
Repp_03_68	Repparfjord_2003	107	117	192	192	96	112	126	138	115	115	172	172	100	100	1
Repp_03_69	Repparfjord_2003	113	117	192	192	100	104	129	135	115	115	160	188	100	100	1
Repp_03_70	Repparfjord_2003	107	107	192	192	96	96	126	126	115	115	184	204	100	104	2
Repp_03_71	Repparfjord_2003	107	109	192	192	96	104	135	138	143	145	176	188	100	100	1
Repp_03_73	Repparfjord_2003	113	141	192	192	96	96	126	135	115	119	164	188	100	104	1
Repp_03_74	Repparfjord_2003	107	109	188	192	96	100	123	123	115	155	156	196	100	100	1
Repp_03_76	Repparfjord_2003	107	107	192	192	96	96	126	132	115	135	168	188	100	104	1
Repp_03_79	Repparfjord_2003	105	107	192	192	96	96	126	129	115	121	164	192	100	104	1
Repp_03_80	Repparfjord_2003	111	111	188	192	96	96	135	141	125	139	144	180	100	100	1
Repp_03_82	Repparfjord_2003	107	115	192	192	92	96	126	126	115	119	148	184	100	100	1
Repp_03_83	Repparfjord_2003	109	109	192	196	92	100	135	138	115	115	160	188	100	100	1
Repp_03_84	Repparfjord_2003	105	119	192	196	96	96	126	129	115	121	184	192	100	104	1
Repp_03_85	Repparfjord_2003	111	113	192	192	92	96	123	126	119	123	184	200	100	100	1
Bals_03_02	Balsfjord_2003	109	119	192	192	96	100	126	129	115	115	188	188	100	100	1
Bals_03_03	Balsfjord_2003	109	113	192	192	96	96	126	129	119	119	148	172	100	104	1
Bals_03_05	Balsfjord_2003	113	129	192	192	96	96	129	141	115	115	152	156	100	100	2
Bals_03_06	Balsfjord_2003	107	113	192	192	96	96	135	138	119	137	160	192	100	100	1
Bals_03_07	Balsfjord_2003	107	107	192	192	96	96	132	135	119	123	172	208	100	104	1
Bals_03_08	Balsfjord_2003	109	109	192	192	96	96	129	129	119	131	164	184	100	100	1
Bals_03_09	Balsfjord_2003	107	119	192	192	92	100	129	135	139	145	156	168	100	100	1
Bals_03_10	Balsfjord_2003	109	113	188	192	96	112	129	132	115	167	156	172	100	100	1
Bals_03_11	Balsfjord_2003	107	107	192	208	96	96	132	141	119	125	156	164	100	104	1
Bals_03_13	Balsfjord_2003	107	107	192	196	92	96	129	141	115	141	180	180	100	100	1
Bals_03_14	Balsfjord_2003	107	107	192	192	96	100	126	126	115	115	188	192	100	100	2
Bals_03_15	Balsfjord_2003	113	141	192	192	96	96	123	150	115	121	144	184	100	104	1
Bals_03_16	Balsfjord_2003	107	141	192	192	96	96	129	132	115	115	168	200	100	104	1
Bals_03_17	Balsfjord_2003	119	119	192	192	96	96	126	129	115	115	164	188	100	104	1
Bals_03_18	Balsfjord_2003	107	115	192	192	104	112	126	132	131	139	140	192	100	100	2
Bals_03_19	Balsfjord_2003	107	113	192	192	96	112	129	132	115	137	172	172	100	100	2
Bals_03_20	Balsfjord_2003	107	129	192	192	96	96	123	138	115	137	176	196	100	104	1
Bals_03_21	Balsfjord_2003	105	111	192	192	92	96	126	132	115	127	160	172	100	104	1
Bals_03_22	Balsfjord_2003	107	117	192	196	92	96	123	135	115	121	160	160	100	104	1
Bals_03_23	Balsfjord_2003	113	113	192	192	96	96	129	135	115	143	156	172	100	100	1
Bals_03_25	Balsfjord_2003	107	121	192	192	92	96	126	129	115	119	176	188	100	100	1
Bals_03_26	Balsfjord_2003	107	113	192	192	92	96	126	129	115	115	160	176	100	104	1
Bals_03_27	Balsfjord_2003	107	141	192	192	96	100	126	132	115	115	160	168	100	100	1
Bals_03_28	Balsfjord_2003	109	113	192	192	92	96	126	132	115	125	128	164	100	100	1
Bals_03_30	Balsfjord_2003	109	117	192	192	100	104	126	126	119	159	164	184	100	100	1
Bals_03_31	Balsfjord_2003	107	109	192	192	96	108	126	126	115	137	176	208	100	100	1
Bals_03_32	Balsfjord_2003	109	145	192	192	96	100	129	135	115	119	168	168	104	104	2
Bals_03_33	Balsfjord_2003	107	111	192	192	96	96	129	138	115	145	160	168	100	100	1
Bals_03_34	Balsfjord_2003	107	113	192	192	96	96	123	138	115	115	160	168	100	104	2
Bals_03_35	Balsfjord_2003	115	115	192	192	100	104	126	126	115	121	156	204	100	100	1
Bals_03_36	Balsfjord_2003	107	113	192	192	96	96	132	132	115	129	164	172	100	100	1
Bals_03_37	Balsfjord_2003	107	115	192	192	96	100	126	129	115	115	148	164	100	100	2
Bals_03_38	Balsfjord_2003	111	111	192	192	100	100	126	132	115	119	164	164	100	100	1
Bals_03_39	Balsfjord_2003	115	121	192	192	96	96	129	135	117	119	164	168	100	100	1
Bals_03_40	Balsfjord_2003	107	113	192	192	96	104	126	126	115	115	172	196	100	104	1
Bals_03_41	Balsfjord_2003	107	109	192	196	96	100	126	132	115	137	172	172	100	104	2
Bals_03_42	Balsfjord_2003	109	111	192	192	96	96	129	135	115	115	184	204	100	104	1
Bals_03_43	Balsfjord_2003	111	111	192	192	92	96	126	135	115	119	172	176	100	100	1
Bals_03_44	Balsfjord_2003	111	119	192	192	96	100	129	135	111	115	172	176	100	104	2
Bals_03_47	Balsfjord_2003	107	119	192	192	92	96	129	135	115	115	140	192	100	100	1
Bals_03_48	Balsfjord_2003	111	113	192	192	96	96	132	141	115	115	192	204	100	100	1
Bals_03_49	Balsfjord_2003	107	115	188	192	92	96	126	126	115	115	160	172	100	104	1
Bals_03_50	Balsfjord_2003	109	119	192	192	92	96	123	126	115	135	180	188	100	104	1
Bals_03_51	Balsfjord_2003	107	113	192	192	96	96	129	138	115	119	180	180	100	104	1
Bals_03_52	Balsfjord_2003	113	127	192	192	96	96	135	138	115	115	184	184	100	104	1
Bals_03_53	Balsfjord_2003	111	113	192	192	96	100	126	132	115	115	172	176	100	100	1
Bals_03_55	Balsfjord_2003	107	113	184	192	92	96	123	132	119	125	196	200	100	100	1
Bals_03_56	Balsfjord_2003	109	119	192	192	100	112	135	135	115	209	156	188	100	100	1
Bals_03_57	Balsfjord_2003	111	113	192	192	92	104	132	132	115	119	156	184	100	100	1
Bals_03_58	Balsfjord_2003	109	117	192	192	92	96	132	135	115	115	140	188	100	100	1
Bals_03_59	Balsfjord_2003	113	119	192	192	96	96	129	129	115	121	152	184	100	104	1
Bals_03_61	Balsfjord_2003	107	113	192	192	96	96	132	141	115	119	156	172	100	100	1
Bals_03_62	Balsfjord_2003	107	109	192	192	96	100	126	129	115	119	160	196	100	100	1
Bals_03_63	Balsfjord_2003	107	109	192	192	96	96	126	132	115	125	164	176	100	104	1
Bals_03_64	Balsfjord_2003	105	119	192	192	96	96	126	135	115	115	168	176	100	104	1
Bals_03_66	Balsfjord_2003	109	119	192	192	96	96	123	135	115	119	160	216	100	104	1
Bals_03_67	Balsfjord_2003	113	117	192	192	96	96	123	135	115	145	164	204	100	100	1
Bals_03_68	Balsfjord_2003	109	111	192	192	96	100	126	135	115	127	164	168	100	100	1
Bals_03_69	Balsfjord_2003	113	133	192	192	96	104	123	132	117	153	172	184	100	100	1
Bals_03_72	Balsfjord_2003	107	117	192	192	96	96	126	132	115	119	156	176	100	104	1
Bals_03_75	Balsfjord_2003	109	113	184	192	96	112	129	138	115	145	168	200	100	100	1
Bals_03_76	Balsfjord_2003	105	119	192	192	96	96	132	132	115	121	156	180	100	104	1
Bals_03_77	Balsfjord_2003	113	119	192	192	96	112	126	141	115	115	164	180	100	100	1
Bals_03_78	Balsfjord_2003	113	113	192	192	96	100	126	135	115	115	176	184	100	100	1
Bals_03_79	Balsfjord_2003	109	115	192	192	96	96	126	135	125	159	164	176	100	100	1
Bals_03_80	Balsfjord_2003	107	113	192	196	96	96	129	132	129	159	156	200	100	100	1
Bals_03_81	Balsfjord_2003	107	119	192	196	96	96	129	132	119	129	160	200	100	100	1
Bals_03_82	Balsfjord_2003	109	113	192	192	96	96	132	135	115	125	164	188	100	100	1
Bals_03_83	Balsfjord_2003	107	113	192	196	96	96	135	141	115	137	176	204	104	104	1
Bals_03_84	Balsfjord_2003	107	113	192	196	92	92	132	138	115	115	156	184	100	100	1
Bals_03_85	Balsfjord_2003	113	115	192	192	96	96	129	132	115	135	192	204	100	100	1
Bals_03_86	Balsfjord_2003	105	107	192	192	96	100	126	126	115	115	168	180	100	104	2
Bals_03_87	Balsfjord_2003	105	117	192	192	96	96	126	132	115	143	160	204	100	100	1
Bals_03_88	Balsfjord_2003	107	117	192	192	96	112	129	141	119	131	184	204	100	100	1
Bals_03_89	Balsfjord_2003	107	109	192	192	96	112	135	138	115	115	172	208	100	104	1
Bals_03_90	Balsfjord_2003	113	113	192	192	96	100	129	129	115	119	140	164	100	100	1
Bals_03_91	Balsfjord_2003	113	113	192	196	100	112	129	129	115	121	168	200	100	100	1
Bals_03_92	Balsfjord_2003	105	113	192	192	96	104	123	132	125	139	172	184	100	104	1
Bals_03_94	Balsfjord_2003	107	117	192	192	96	96	132	135	119	121	160	172	100	100	1
Bals_03_95	Balsfjord_2003	107	111	192	192	96	96	132	132	115	143	164	184	100	100	1
Bals_03_96	Balsfjord_2003	109	113	188	192	96	104	129	138	115	137	152	184	100	100	1
Eids_03_80	Eidsfjord_2003	105	141	192	196	96	96	129	129	115	129	156	188	100	100	1
Eids_03_81	Eidsfjord_2003	105	113	192	192	96	96	135	135	115	159	160	160	100	100	1
Eids_03_82	Eidsfjord_2003	107	109	192	192	96	100	132	138	115	125	156	172	100	100	1
Eids_03_83	Eidsfjord_2003	109	115	192	192	96	96	129	138	139	143	164	172	100	100	1
Eids_03_84	Eidsfjord_2003	107	109	192	192	96	96	126	141	115	115	184	184	100	104	1
Eids_03_85	Eidsfjord_2003	107	109	192	192	108	112	129	129	139	145	164	192	100	100	1
Eids_03_87	Eidsfjord_2003	107	119	192	192	96	96	126	129	115	115	176	200	100	100	1
Eids_03_88	Eidsfjord_2003	119	119	192	192	96	100	132	135	115	145	160	176	100	100	1
Eids_03_89	Eidsfjord_2003	113	133	192	192	92	112	129	132	115	115	148	164	100	100	1
Eids_03_90	Eidsfjord_2003	113	141	192	192	92	100	126	126	115	159	184	216	100	100	1
Eids_03_91	Eidsfjord_2003	107	121	192	192	100	100	135	135	115	141	160	196	100	100	1
Eids_03_92	Eidsfjord_2003	107	119	192	192	88	96	123	126	115	121	172	204	100	100	1
Eids_03_93	Eidsfjord_2003	107	107	192	192	96	96	126	129	115	137	148	184	100	104	1
Eids_03_94	Eidsfjord_2003	113	117	192	192	84	96	129	135	123	127	196	200	100	100	1
Eids_03_95	Eidsfjord_2003	107	109	192	192	92	100	123	129	115	135	144	184	100	100	1
Eids_03_96	Eidsfjord_2003	119	119	192	192	96	96	126	135	115	133	156	172	100	100	1
Eids_03_97	Eidsfjord_2003	113	113	192	192	96	112	123	138	119	137	156	156	100	100	1
Eids_03_98	Eidsfjord_2003	109	109	192	192	92	96	129	129	125	135	144	156	100	100	1
Eids_03_99	Eidsfjord_2003	117	117	192	192	92	96	126	132	115	125	188	204	100	104	1
Eids_03_101	Eidsfjord_2003	107	117	192	192	96	100	135	141	115	137	128	192	100	104	1
Eids_03_104	Eidsfjord_2003	107	113	192	192	96	96	129	135	119	119	156	156	100	100	1
Eids_03_105	Eidsfjord_2003	111	119	192	192	96	100	129	138	115	125	188	192	100	100	1
Eids_03_106	Eidsfjord_2003	107	107	192	192	96	100	129	138	159	159	144	168	100	100	1
Eids_03_107	Eidsfjord_2003	105	105	192	192	92	96	126	129	115	159	168	172	100	104	1
Eids_03_108	Eidsfjord_2003	113	141	192	192	96	96	126	132	115	135	176	176	100	100	1
Eids_03_111	Eidsfjord_2003	109	115	192	192	92	96	126	135	115	143	188	208	100	100	1
Eids_03_112	Eidsfjord_2003	109	109	192	192	96	96	126	126	115	133	180	200	100	104	1
Eids_03_115	Eidsfjord_2003	107	115	192	192	92	96	126	126	121	133	152	200	100	104	1
Eids_03_116	Eidsfjord_2003	107	111	184	192	92	96	129	129	139	143	156	168	100	100	2
Eids_03_118	Eidsfjord_2003	111	113	192	192	96	96	126	129	137	139	148	172	100	100	1
Eids_03_119	Eidsfjord_2003	109	113	192	192	96	104	123	129	115	121	168	168	100	104	1
Eids_03_120	Eidsfjord_2003	107	111	192	192	96	96	129	135	141	159	156	172	100	100	1
Eids_03_122	Eidsfjord_2003	119	125	192	192	96	96	126	126	129	139	156	172	100	100	1
Eids_03_123	Eidsfjord_2003	105	111	192	192	96	96	126	135	115	137	160	176	100	104	1
Eids_03_124	Eidsfjord_2003	107	121	192	192	92	100	120	141	115	115	144	164	100	100	1
Eids_03_125	Eidsfjord_2003	105	113	192	192	96	96	126	129	141	149	128	168	100	100	1
Eids_03_126	Eidsfjord_2003	113	119	192	192	96	104	132	132	115	131	180	192	100	100	1
Eids_03_127	Eidsfjord_2003	107	109	192	192	92	96	126	126	115	127	148	176	100	100	1
Eids_03_129	Eidsfjord_2003	117	143	192	192	96	108	129	129	119	137	172	172	100	100	1
Eids_03_130	Eidsfjord_2003	107	113	184	192	96	100	132	135	121	151	156	208	100	100	1
Eids_03_132	Eidsfjord_2003	107	113	192	192	96	100	126	129	137	141	160	168	100	100	1
Eids_03_133	Eidsfjord_2003	107	109	192	192	100	108	129	132	135	145	140	192	100	100	1
Eids_03_135	Eidsfjord_2003	107	109	196	196	108	112	129	141	115	137	168	168	100	100	1
Eids_03_136	Eidsfjord_2003	107	109	192	192	96	104	126	129	115	145	172	176	100	100	1
Eids_03_137	Eidsfjord_2003	107	109	192	192	96	96	129	138	115	135	128	164	100	100	1
Eids_03_138	Eidsfjord_2003	119	119	192	192	84	96	126	141	115	141	168	172	100	100	1
Eids_03_140	Eidsfjord_2003	107	109	192	192	92	96	126	135	135	135	152	172	100	100	1
Eids_03_141	Eidsfjord_2003	109	119	192	192	96	96	135	138	119	137	156	184	100	100	1
Eids_03_142	Eidsfjord_2003	115	115	192	192	96	100	129	132	125	137	164	192	100	104	1
Eids_03_143	Eidsfjord_2003	119	137	192	192	88	104	126	129	115	135	164	200	100	100	1
Eids_03_144	Eidsfjord_2003	109	113	192	192	96	96	135	141	125	131	160	172	100	100	1
Eids_03_145	Eidsfjord_2003	117	119	192	196	96	96	126	129	115	135	184	184	100	100	1
Eids_03_146	Eidsfjord_2003	107	115	192	192	96	100	132	138	115	131	172	176	100	100	1
Eids_03_147	Eidsfjord_2003	109	115	192	192	96	100	126	126	115	119	200	200	100	100	2
Eids_03_149	Eidsfjord_2003	119	119	192	192	96	96	129	135	115	125	168	208	100	100	1
Eids_03_150	Eidsfjord_2003	111	121	192	192	96	96	126	129	115	135	144	184	100	104	1
Eids_03_152	Eidsfjord_2003	113	113	192	192	96	96	123	129	145	147	172	180	100	100	1
Eids_03_153	Eidsfjord_2003	119	119	192	192	96	96	123	135	115	133	160	184	100	100	1
Eids_03_154	Eidsfjord_2003	107	119	192	192	92	100	135	135	115	139	160	176	100	100	1
Eids_03_155	Eidsfjord_2003	113	117	192	192	96	100	123	138	115	135	160	200	100	104	2
Eids_03_157	Eidsfjord_2003	121	121	192	192	96	96	135	135	115	115	196	204	100	100	1
Eids_03_165	Eidsfjord_2003	105	105	192	192	96	96	120	135	115	135	192	208	100	100	1
Eids_03_166	Eidsfjord_2003	107	145	192	192	84	96	126	132	115	115	152	168	100	100	1
Eids_03_167	Eidsfjord_2003	107	113	192	192	96	96	132	129	119	137	160	176	100	100	1
Eids_03_168	Eidsfjord_2003	111	119	176	192	96	96	123	138	139	155	168	168	100	100	1
Eids_03_170	Eidsfjord_2003	109	135	192	196	96	96	126	129	115	137	176	188	100	100	1
Eids_03_171	Eidsfjord_2003	111	113	188	192	92	96	129	132	115	115	200	200	100	100	1
Eids_03_172	Eidsfjord_2003	119	119	192	196	96	96	135	132	115	139	192	196	100	100	1
Tyss_03_01	Tysfjord_2003	111	111	184	192	96	96	132	132	117	125	176	204	100	100	1
Tyss_03_02	Tysfjord_2003	109	119	192	192	92	96	126	138	115	115	144	184	100	100	1
Tyss_03_03	Tysfjord_2003	109	115	192	192	96	100	126	135	115	143	180	188	100	100	1
Tyss_03_04	Tysfjord_2003	113	119	192	192	92	96	123	129	115	121	160	172	100	104	1
Tyss_03_05	Tysfjord_2003	113	119	192	192	96	104	123	129	125	137	176	196	100	100	1
Tyss_03_09	Tysfjord_2003	119	119	192	192	96	96	123	138	115	145	160	188	100	100	1
Tyss_03_11	Tysfjord_2003	107	117	192	196	92	96	123	126	115	139	156	204	100	100	1
Tyss_03_12	Tysfjord_2003	107	109	192	192	96	96	123	126	115	115	140	156	100	104	1
Tyss_03_13	Tysfjord_2003	109	129	192	192	100	100	126	129	115	135	144	164	100	100	1
Tyss_03_15	Tysfjord_2003	113	119	192	192	92	96	126	132	115	137	144	160	100	100	1
Tyss_03_16	Tysfjord_2003	113	119	192	196	92	100	132	138	115	115	148	164	100	100	1
Tyss_03_17	Tysfjord_2003	113	115	192	192	96	96	132	135	115	151	180	180	100	100	1
Tyss_03_18	Tysfjord_2003	109	125	192	192	92	96	129	138	115	127	160	196	100	100	1
Tyss_03_19	Tysfjord_2003	107	115	192	192	92	96	126	138	115	137	128	156	100	104	1
Tyss_03_20	Tysfjord_2003	107	113	192	192	96	96	132	132	115	119	160	180	100	100	1
Tyss_03_21	Tysfjord_2003	107	115	188	192	96	96	126	138	115	115	124	176	100	100	1
Tyss_03_22	Tysfjord_2003	105	107	192	192	92	96	126	132	115	115	144	184	100	100	1
Tyss_03_23	Tysfjord_2003	117	119	192	192	100	100	129	129	125	139	128	168	100	104	1
Tyss_03_24	Tysfjord_2003	119	119	192	192	96	96	126	132	115	133	176	176	100	100	1
Tyss_03_25	Tysfjord_2003	111	113	192	192	96	100	126	132	117	135	160	188	100	104	1
Tyss_03_26	Tysfjord_2003	107	113	192	192	96	96	132	135	115	115	180	180	100	100	1
Tyss_03_27	Tysfjord_2003	107	123	192	192	96	100	126	132	115	119	160	196	100	100	1
Tyss_03_28	Tysfjord_2003	111	129	192	196	92	100	132	135	127	135	156	160	100	100	1
Tyss_03_29	Tysfjord_2003	111	119	192	192	96	100	126	129	109	119	156	156	100	104	1
Tyss_03_32	Tysfjord_2003	113	113	184	192	92	104	129	138	115	115	164	184	100	100	1
Tyss_03_33	Tysfjord_2003	113	115	192	196	96	100	129	138	115	137	184	204	100	104	1
Tyss_03_34	Tysfjord_2003	105	113	192	192	96	100	129	138	115	117	160	172	100	100	1
Tyss_03_36	Tysfjord_2003	107	107	184	192	96	96	126	126	115	115	180	180	100	100	1
Tyss_03_38	Tysfjord_2003	105	119	192	192	96	96	126	141	115	135	176	176	100	100	1
Tyss_03_39	Tysfjord_2003	107	119	192	192	92	100	132	141	119	125	172	188	100	100	1
Tyss_03_41	Tysfjord_2003	107	115	184	196	84	92	129	129	115	139	156	184	100	100	1
Tyss_03_43	Tysfjord_2003	111	111	192	192	92	96	132	135	115	139	168	192	100	100	1
Tyss_03_44	Tysfjord_2003	113	141	192	192	100	104	129	129	115	135	192	192	100	100	2
Tyss_03_45	Tysfjord_2003	113	123	192	192	96	96	126	126	135	145	172	172	100	100	1
Tyss_03_46	Tysfjord_2003	109	131	192	192	96	96	132	141	115	121	176	192	100	104	1
Tyss_03_48	Tysfjord_2003	105	107	192	192	96	112	132	135	115	115	192	200	100	100	2
Vega_03_201	Vega_2003	107	113	192	192	96	104	129	138	125	141	156	164	100	100	1
Vega_03_203	Vega_2003	105	117	192	192	96	96	123	141	115	115	144	192	100	104	1
Vega_03_205	Vega_2003	105	111	192	192	96	96	126	129	115	131	160	176	100	104	1
Vega_03_206	Vega_2003	111	119	192	192	96	104	126	129	115	115	176	184	100	100	2
Vega_03_207	Vega_2003	107	109	192	192	100	104	129	129	125	135	172	200	100	100	1
Vega_03_208	Vega_2003	107	113	192	196	96	96	129	132	125	145	172	200	100	100	1
Vega_03_209	Vega_2003	107	111	192	192	96	112	126	138	115	115	176	180	100	100	1
Vega_03_210	Vega_2003	109	113	192	192	96	96	126	141	115	131	140	196	100	100	1
Vega_03_211	Vega_2003	115	127	192	192	96	112	126	141	115	145	148	184	100	100	1
Vega_03_212	Vega_2003	109	113	196	196	104	112	126	135	115	143	164	172	100	100	1
Vega_03_213	Vega_2003	107	113	192	192	92	96	132	141	115	115	168	192	100	104	1
Vega_03_214	Vega_2003	113	119	192	192	96	96	129	129	115	115	156	212	100	100	1
Vega_03_215	Vega_2003	105	115	192	192	96	96	126	135	137	139	164	196	100	100	1
Vega_03_216	Vega_2003	105	105	192	192	96	96	135	141	115	117	164	180	100	100	1
Vega_03_217	Vega_2003	113	119	192	196	96	96	123	135	115	145	164	188	100	104	2
Vega_03_218	Vega_2003	119	123	184	192	96	96	135	135	117	133	156	184	100	100	1
Vega_03_219	Vega_2003	107	113	192	192	92	96	132	132	115	143	160	160	100	100	1
Vega_03_220	Vega_2003	107	119	192	192	96	100	123	123	135	137	160	208	100	100	1
Vega_03_221	Vega_2003	113	113	192	192	100	104	129	138	117	145	160	184	100	100	1
Vega_03_222	Vega_2003	107	119	192	192	96	100	129	132	115	155	148	156	100	100	2
Vega_03_223	Vega_2003	107	107	192	192	92	96	132	132	133	145	180	204	100	100	1
Vega_03_224	Vega_2003	111	117	192	192	96	104	126	141	115	139	156	184	100	100	1
Vega_03_225	Vega_2003	107	109	192	192	96	100	126	126	139	143	168	184	100	100	1
Vega_03_226	Vega_2003	119	141	192	192	96	108	126	138	115	135	192	192	100	100	1
Vega_03_227	Vega_2003	109	111	192	192	96	96	132	135	115	117	176	192	100	104	2
Vega_03_228	Vega_2003	107	107	192	192	96	112	135	132	137	137	164	164	100	100	1
Vega_03_229	Vega_2003	109	113	192	192	96	96	126	135	115	137	172	180	100	104	1
Vega_03_230	Vega_2003	105	109	192	192	96	96	126	138	115	155	188	196	100	104	2
Vega_03_231	Vega_2003	113	133	192	192	96	96	129	135	115	133	156	172	100	100	1
Vega_03_232	Vega_2003	107	115	192	192	96	100	126	141	115	137	168	172	100	100	1
Vega_03_233	Vega_2003	111	115	192	192	92	96	126	126	115	115	172	172	100	100	1
Vega_03_234	Vega_2003	111	111	192	192	92	100	126	141	139	139	172	172	100	100	1
Vega_03_235	Vega_2003	109	111	188	192	108	112	129	135	125	143	176	176	100	100	1
Vega_03_236	Vega_2003	109	119	188	192	96	96	126	135	115	141	180	188	100	100	1
Vega_03_237	Vega_2003	113	127	192	192	92	96	126	138	115	115	196	196	100	104	1
Vega_03_238	Vega_2003	107	113	192	192	96	96	120	135	115	115	132	176	100	100	1
Vega_03_240	Vega_2003	113	113	192	192	92	96	126	138	115	133	164	184	100	100	1
Vega_03_241	Vega_2003	111	113	192	196	96	100	123	129	115	129	172	184	100	100	1
Vega_03_243	Vega_2003	107	113	192	192	104	112	123	141	115	137	148	204	100	100	1
Vega_03_244	Vega_2003	115	141	192	192	96	96	129	138	125	125	144	188	100	100	1
Vega_03_245	Vega_2003	109	113	192	192	96	96	126	129	115	119	184	204	100	104	1
Vega_03_246	Vega_2003	119	141	192	192	96	100	126	129	115	115	196	196	100	104	2
Vega_03_247	Vega_2003	109	129	192	196	96	96	126	138	123	153	180	184	100	100	1
Vega_03_248	Vega_2003	113	129	192	192	96	96	129	141	115	115	128	164	100	104	1
Vega_03_249	Vega_2003	105	113	192	196	96	100	126	135	115	139	168	180	100	100	1
Vega_03_250	Vega_2003	115	127	192	192	96	96	129	135	115	127	184	216	100	104	1
Vega_03_251	Vega_2003	105	123	192	192	96	96	129	129	115	119	196	196	100	104	1
Vega_03_252	Vega_2003	107	111	192	192	92	100	129	132	137	141	180	188	100	100	1
Vega_03_253	Vega_2003	107	117	192	192	96	96	126	129	131	151	160	168	100	100	1
Vega_03_254	Vega_2003	105	119	192	192	96	100	126	132	115	115	172	172	100	100	1
Vega_03_255	Vega_2003	105	115	192	192	96	104	126	129	137	143	168	192	100	100	1
Vega_03_256	Vega_2003	105	109	196	196	84	96	129	132	115	115	160	192	100	100	1
Vega_03_257	Vega_2003	107	117	192	192	96	96	126	129	115	115	148	208	100	104	1
Vega_03_258	Vega_2003	107	113	192	192	96	96	126	129	115	115	160	160	104	104	1
Vega_03_259	Vega_2003	105	117	192	192	92	100	126	129	115	149	172	200	100	100	1
Vega_03_260	Vega_2003	115	119	192	192	96	100	126	132	115	135	164	164	100	104	1
Vega_03_262	Vega_2003	105	107	192	192	96	96	132	132	115	115	172	184	100	104	2
Vega_03_263	Vega_2003	107	107	192	192	96	96	123	129	115	115	144	164	104	104	1
Vega_03_264	Vega_2003	107	109	192	192	96	100	129	132	115	115	168	192	100	100	1
Vega_03_266	Vega_2003	107	107	192	196	96	100	129	129	115	141	148	200	100	100	1
Vega_03_267	Vega_2003	107	107	192	196	92	96	135	135	115	139	164	168	100	100	1
Vega_03_268	Vega_2003	107	119	192	192	96	96	123	135	119	119	200	200	100	100	1
Vega_03_269	Vega_2003	109	115	192	196	96	96	126	129	115	115	168	176	100	104	1
Vega_03_270	Vega_2003	105	117	192	192	92	100	126	129	115	149	172	200	100	100	1
Vega_03_273	Vega_2003	105	105	192	192	96	96	132	132	115	135	164	188	100	104	1
Vega_03_275	Vega_2003	105	113	192	192	96	100	126	129	115	145	172	204	100	100	1
Vega_03_276	Vega_2003	107	117	192	192	96	100	126	135	131	145	160	180	100	100	1
Vega_03_277	Vega_2003	119	137	192	192	96	96	132	141	115	137	164	172	100	100	1
Vega_03_278	Vega_2003	107	115	192	192	96	96	126	132	131	135	164	172	100	100	1
Vega_03_279	Vega_2003	107	109	192	192	100	112	129	132	115	141	180	180	100	100	1
Vega_03_281	Vega_2003	111	113	192	192	96	112	123	123	115	115	184	200	100	100	1
Vega_03_282	Vega_2003	115	117	192	192	96	104	132	138	115	139	156	172	100	104	1
Vega_03_284	Vega_2003	105	113	192	192	96	96	132	138	115	117	172	180	100	104	2
Vega_03_285	Vega_2003	107	125	192	192	96	96	126	138	115	125	204	212	100	104	1
Vega_03_286	Vega_2003	109	117	192	192	96	96	132	132	115	137	156	156	100	100	1
Vega_03_287	Vega_2003	107	119	192	192	92	96	132	138	115	115	156	160	100	100	1
Vega_03_288	Vega_2003	107	119	192	196	92	96	126	138	133	139	156	160	100	100	1
Vega_03_290	Vega_2003	107	115	192	192	96	108	126	132	121	145	172	212	100	100	1
Vega_03_291	Vega_2003	109	113	192	192	96	112	126	132	115	137	196	200	100	100	1
Vega_03_292	Vega_2003	105	113	192	192	96	96	129	132	115	125	176	200	100	104	1
Vega_03_293	Vega_2003	109	113	192	192	96	112	126	129	115	115	160	184	100	100	1
Vikn_03_309	Vikna_2003	113	119	192	196	96	100	129	135	115	123	156	160	100	100	1
Vikn_03_310	Vikna_2003	105	107	192	192	92	104	126	132	115	135	152	192	100	104	1
Vikn_03_313	Vikna_2003	117	119	192	192	96	96	138	138	135	139	176	184	100	100	1
Vikn_03_314	Vikna_2003	113	119	188	192	96	104	123	129	139	149	148	188	100	104	1
Vikn_03_315	Vikna_2003	105	113	192	192	96	100	126	135	115	115	188	208	100	100	2
Vikn_03_316	Vikna_2003	107	107	192	192	96	112	135	141	137	141	200	200	100	100	1
Vikn_03_317	Vikna_2003	107	113	192	192	96	96	126	132	115	115	184	192	100	104	1
Vikn_03_318	Vikna_2003	105	115	192	192	96	96	132	138	115	145	128	164	100	100	1
Vikn_03_319	Vikna_2003	107	113	192	192	96	104	132	141	133	137	172	184	100	100	1
Vikn_03_320	Vikna_2003	107	113	192	192	96	96	126	126	99	151	128	148	100	100	1
Vikn_03_321	Vikna_2003	113	113	192	192	92	96	126	138	115	137	160	172	100	100	1
Vikn_03_322	Vikna_2003	107	133	192	196	96	100	126	126	135	147	172	208	100	100	2
Vikn_03_323	Vikna_2003	107	109	184	192	96	96	123	129	115	115	156	168	100	100	1
Vikn_03_324	Vikna_2003	107	113	192	192	100	100	132	141	115	147	156	192	100	100	1
Vikn_03_325	Vikna_2003	111	119	168	188	96	96	132	135	137	139	156	176	100	100	1
Vikn_03_326	Vikna_2003	107	109	192	192	96	100	132	132	115	115	164	188	100	100	1
Vikn_03_327	Vikna_2003	107	113	192	192	96	104	135	138	135	139	180	184	100	100	1
Vikn_03_328	Vikna_2003	109	111	188	192	96	100	132	135	119	147	156	204	100	100	1
Vikn_03_330	Vikna_2003	105	107	192	192	100	112	129	132	115	131	156	160	100	100	1
Vikn_03_331	Vikna_2003	105	107	192	192	96	96	129	132	125	139	160	164	100	100	1
Vikn_03_333	Vikna_2003	107	109	192	192	96	96	132	132	111	115	152	184	100	100	2
Vikn_03_334	Vikna_2003	115	119	192	192	104	112	132	135	115	115	148	168	100	100	1
Vikn_03_335	Vikna_2003	113	113	196	196	92	96	129	129	115	143	164	192	100	100	1
Vikn_03_336	Vikna_2003	109	113	192	192	96	96	126	129	121	125	148	204	100	104	1
Vikn_03_337	Vikna_2003	107	111	192	192	96	100	126	126	141	143	172	208	100	100	1
Vikn_03_338	Vikna_2003	107	107	192	192	84	96	132	138	115	137	120	184	100	100	1
Vikn_03_340	Vikna_2003	109	113	192	192	92	96	129	129	115	143	164	208	100	100	1
Vikn_03_341	Vikna_2003	111	119	192	192	96	96	126	126	115	133	204	208	100	104	1
Vikn_03_342	Vikna_2003	107	113	188	192	92	96	132	138	111	169	156	176	100	104	1
Vikn_03_343	Vikna_2003	107	109	192	192	92	96	126	132	115	137	184	204	100	100	1
Vikn_03_344	Vikna_2003	109	113	192	192	92	92	126	135	133	147	176	176	100	104	1
Vikn_03_345	Vikna_2003	107	107	192	192	96	100	126	129	137	143	160	172	100	100	1
Vikn_03_346	Vikna_2003	109	113	192	192	96	104	129	129	137	139	164	204	100	100	1
Vikn_03_349	Vikna_2003	107	115	192	192	96	96	129	129	119	153	164	192	100	100	1
Vikn_03_350	Vikna_2003	111	117	192	192	96	96	123	129	121	143	176	184	100	100	1
Vikn_03_351	Vikna_2003	113	141	184	192	92	96	126	129	133	137	164	180	100	100	1
Vikn_03_352	Vikna_2003	115	115	184	184	96	100	126	132	135	137	172	180	100	100	1
Vikn_03_353	Vikna_2003	111	117	192	192	96	96	126	126	115	135	176	192	100	104	1
Vikn_03_354	Vikna_2003	119	119	168	192	96	96	126	138	119	143	168	172	100	100	2
Vikn_03_355	Vikna_2003	107	117	192	196	92	96	135	141	115	145	152	188	100	100	2
Vikn_03_357	Vikna_2003	107	133	184	192	96	96	126	129	131	141	176	176	100	104	1
Vikn_03_358	Vikna_2003	107	107	192	196	96	100	129	132	117	135	188	188	100	100	1
Vikn_03_359	Vikna_2003	107	119	192	192	92	96	129	141	115	147	148	176	100	100	1
Vikn_03_362	Vikna_2003	107	115	192	196	96	108	123	126	119	147	172	184	100	100	1
Vikn_03_363	Vikna_2003	107	117	192	192	92	96	126	132	115	139	156	196	100	100	2
Vikn_03_364	Vikna_2003	113	115	192	192	96	96	132	138	115	139	168	180	100	100	1
Vikn_03_365	Vikna_2003	107	113	192	192	96	96	126	129	115	125	188	192	100	100	1
Vikn_03_366	Vikna_2003	109	115	188	192	100	100	129	132	115	137	144	184	100	104	1
Vikn_03_367	Vikna_2003	109	113	192	192	92	96	123	138	115	143	164	204	100	104	1
Vikn_03_368	Vikna_2003	107	107	192	192	96	96	126	135	125	133	160	192	100	100	1
Vikn_03_369	Vikna_2003	105	115	192	192	96	96	126	129	125	143	164	184	100	104	1
Vikn_03_370	Vikna_2003	111	119	192	192	92	96	129	135	119	139	156	180	100	100	1
Vikn_03_371	Vikna_2003	107	117	192	192	96	96	126	132	143	145	172	204	100	104	1
Vikn_03_372	Vikna_2003	107	109	192	192	96	96	123	135	115	133	164	180	100	100	1
Vikn_03_373	Vikna_2003	107	141	192	192	96	112	129	129	115	143	156	180	100	104	1
Vikn_03_374	Vikna_2003	109	119	192	192	96	96	129	132	125	139	152	156	100	100	1
Vikn_03_375	Vikna_2003	107	107	180	192	96	96	132	135	115	145	176	196	100	100	2
Vikn_03_377	Vikna_2003	105	105	192	192	96	96	132	135	115	145	168	176	100	104	1
Vikn_03_378	Vikna_2003	107	113	192	192	84	96	132	135	137	163	156	164	100	100	1
Vikn_03_379	Vikna_2003	105	113	192	192	96	100	123	132	115	145	128	188	100	100	1
Vikn_03_380	Vikna_2003	107	111	192	192	96	96	126	132	125	151	172	176	100	104	1
Vikn_03_381	Vikna_2003	105	107	192	192	96	96	126	129	115	129	164	192	100	100	1
Vikn_03_382	Vikna_2003	107	113	192	192	96	96	126	126	115	147	172	172	100	100	1
Vikn_03_383	Vikna_2003	113	117	192	192	92	100	135	138	115	127	176	188	100	100	1
Vikn_03_385	Vikna_2003	111	113	192	192	96	100	129	129	115	117	160	176	100	100	1
Vikn_03_386	Vikna_2003	105	107	192	192	92	96	126	132	115	161	160	172	100	100	1
Vikn_03_387	Vikna_2003	117	123	192	192	96	96	126	135	115	121	164	176	100	104	1
Vikn_03_388	Vikna_2003	111	113	188	188	92	96	123	126	115	115	172	188	100	100	1
Vikn_03_389	Vikna_2003	107	113	192	192	96	96	129	138	135	155	140	176	100	100	1
Vikn_03_390	Vikna_2003	107	109	192	192	100	100	129	135	115	157	168	184	100	100	1
Vikn_03_391	Vikna_2003	109	113	192	192	100	112	129	138	125	139	176	192	100	100	1
Vikn_03_392	Vikna_2003	109	111	192	192	92	96	126	132	139	145	184	192	100	100	1
Vikn_03_393	Vikna_2003	105	113	192	192	96	96	129	132	115	119	164	184	100	100	1
Vikn_03_395	Vikna_2003	113	131	188	192	96	96	123	135	115	135	172	188	100	100	2
Vikn_03_397	Vikna_2003	107	119	192	196	96	96	129	135	115	115	172	208	100	100	1
Vikn_03_398	Vikna_2003	109	113	192	192	96	96	132	132	133	135	172	192	100	100	1
Vikn_03_399	Vikna_2003	113	113	192	192	96	96	129	132	115	139	168	172	100	104	1
Vikn_03_400	Vikna_2003	107	107	192	192	84	96	129	138	119	137	172	204	100	100	1
Vikn_03_401	Vikna_2003	111	111	192	192	92	96	126	135	115	147	164	172	100	100	1
Smol_03_403	Smøla_2003	107	109	192	196	96	100	129	132	117	155	184	196	100	100	1
Smol_03_404	Smøla_2003	115	117	192	192	100	104	126	126	115	143	180	200	100	100	1
Smol_03_408	Smøla_2003	107	111	192	192	84	96	132	135	115	137	168	204	100	100	1
Smol_03_409	Smøla_2003	105	107	192	192	96	96	135	138	115	115	176	188	100	100	1
Smol_03_410	Smøla_2003	107	141	188	188	92	96	123	132	137	149	156	168	100	100	1
Smol_03_411	Smøla_2003	109	109	192	192	84	96	135	138	137	143	184	188	100	100	1
Smol_03_412	Smøla_2003	113	119	192	192	96	104	132	135	125	137	188	204	100	100	1
Smol_03_415	Smøla_2003	109	111	192	192	100	108	123	132	115	143	176	188	100	100	1
Smol_03_416	Smøla_2003	111	115	192	192	96	100	126	135	133	147	172	208	100	100	1
Smol_03_418	Smøla_2003	113	113	192	192	96	96	132	138	133	143	160	180	100	100	1
Smol_03_420	Smøla_2003	105	113	192	192	96	96	126	126	133	139	172	180	100	100	1
Smol_03_421	Smøla_2003	109	109	192	192	96	100	129	138	137	145	148	176	100	104	1
Smol_03_423	Smøla_2003	109	113	192	192	92	100	123	132	135	143	156	172	100	100	1
Smol_03_424	Smøla_2003	115	115	192	192	96	96	129	138	133	133	164	184	100	100	1
Smol_03_426	Smøla_2003	113	119	192	192	92	96	132	138	143	145	144	196	100	100	1
Smol_03_427	Smøla_2003	113	113	192	192	88	96	129	135	125	137	172	184	100	100	1
Smol_03_428	Smøla_2003	109	109	192	192	92	96	129	135	133	153	160	172	100	100	1
Smol_03_429	Smøla_2003	113	123	188	192	96	96	126	135	125	143	144	164	100	100	1
Smol_03_430	Smøla_2003	119	123	192	192	84	96	132	138	131	143	160	188	100	100	1
Smol_03_432	Smøla_2003	107	109	192	192	92	100	126	126	137	161	160	180	100	100	1
Smol_03_434	Smøla_2003	111	115	192	192	96	100	129	138	115	137	164	176	100	100	1
Smol_03_435	Smøla_2003	105	105	192	192	96	104	126	132	135	137	172	192	100	100	1
Smol_03_436	Smøla_2003	107	109	192	192	92	100	126	135	117	137	152	152	100	100	1
Smol_03_437	Smøla_2003	111	117	192	196	96	100	126	132	115	135	140	196	100	104	1
Smol_03_438	Smøla_2003	113	113	192	196	96	96	132	135	119	147	184	184	100	100	1
Smol_03_439	Smøla_2003	109	113	192	192	104	112	123	132	115	115	188	208	100	100	1
Smol_03_440	Smøla_2003	105	123	192	192	96	96	126	126	127	135	184	192	100	100	1
Smol_03_441	Smøla_2003	113	113	192	192	92	96	123	138	115	135	172	172	100	100	1
Smol_03_442	Smøla_2003	107	113	192	192	92	96	129	129	135	147	168	180	100	100	1
Smol_03_443	Smøla_2003	107	107	192	192	96	96	126	129	115	139	148	184	100	100	1
Smol_03_444	Smøla_2003	111	113	192	192	96	96	132	132	115	149	172	172	100	100	1
Smol_03_445	Smøla_2003	107	111	192	192	100	100	123	126	115	157	176	180	100	100	1
Smol_03_446	Smøla_2003	107	113	192	192	96	96	126	138	115	139	160	160	100	100	1
Smol_03_447	Smøla_2003	111	117	192	196	104	104	129	138	115	133	160	192	100	100	1
Smol_03_448	Smøla_2003	109	113	192	192	92	96	123	132	115	135	152	160	100	100	1
Smol_03_449	Smøla_2003	113	115	192	192	100	100	129	138	115	115	160	164	100	100	1
Smol_03_450	Smøla_2003	113	117	192	192	96	96	126	141	115	147	156	172	100	100	1
Smol_03_451	Smøla_2003	107	113	192	192	100	108	132	138	177	201	172	180	100	100	1
Smol_03_452	Smøla_2003	107	119	192	196	100	100	126	129	115	137	168	192	100	100	1
Smol_03_453	Smøla_2003	111	113	192	192	92	100	132	135	115	131	164	184	100	100	1
Smol_03_455	Smøla_2003	105	119	192	196	96	104	129	135	133	137	156	164	100	100	1
Smol_03_456	Smøla_2003	107	113	192	192	96	112	129	132	121	137	180	188	100	100	1
Smol_03_457	Smøla_2003	111	113	192	192	96	108	126	126	115	145	132	180	100	100	1
Smol_03_459	Smøla_2003	107	109	192	192	96	104	129	129	135	147	156	176	100	104	1
Smol_03_460	Smøla_2003	107	113	192	192	88	96	132	135	131	193	156	176	100	100	1
Smol_03_461	Smøla_2003	109	113	192	192	104	108	132	138	121	131	160	192	100	100	1
Smol_03_462	Smøla_2003	107	107	188	192	92	96	126	132	119	137	204	204	100	104	1
Smol_03_463	Smøla_2003	107	113	192	192	92	96	129	129	131	137	160	200	100	100	1
Smol_03_464	Smøla_2003	107	117	192	192	100	100	126	129	133	147	172	188	100	100	1
Smol_03_466	Smøla_2003	113	119	188	192	92	96	123	138	115	143	180	184	100	100	1
Smol_03_468	Smøla_2003	105	107	192	192	96	108	132	138	115	145	164	212	100	104	1
Smol_03_470	Smøla_2003	107	109	192	192	96	100	126	129	115	143	152	164	100	100	1
Smol_03_471	Smøla_2003	105	107	192	192	92	96	126	126	115	125	172	184	100	100	1
Smol_03_472	Smøla_2003	109	123	192	192	96	96	129	129	139	143	164	188	100	100	1
Smol_03_473	Smøla_2003	107	111	180	192	96	104	132	135	135	151	208	208	100	100	1
Smol_03_474	Smøla_2003	107	107	192	192	92	96	129	132	133	139	188	192	100	100	1
Smol_03_475	Smøla_2003	107	113	192	192	96	100	123	129	121	139	128	196	100	100	1
Smol_03_476	Smøla_2003	105	113	192	192	96	100	129	132	125	135	156	180	100	100	1
Smol_03_477	Smøla_2003	107	113	192	192	96	100	126	129	115	145	188	208	100	100	1
Smol_03_478	Smøla_2003	109	113	192	192	96	100	126	135	141	155	176	176	100	100	1
Smol_03_479	Smøla_2003	109	113	192	192	96	108	135	138	143	157	164	172	100	100	1
Smol_03_481	Smøla_2003	107	117	192	192	92	100	126	135	121	143	176	184	100	100	1
Smol_03_482	Smøla_2003	113	113	192	192	108	108	126	135	133	137	176	204	100	100	1
Smol_03_483	Smøla_2003	107	129	192	192	96	100	132	144	115	137	156	200	100	100	1
Smol_03_484	Smøla_2003	109	113	192	192	96	96	129	132	137	159	188	200	100	100	1
Smol_03_485	Smøla_2003	109	115	192	192	96	104	126	129	115	131	172	184	100	104	1
Smol_03_486	Smøla_2003	111	115	192	192	92	96	123	129	115	135	148	196	100	100	1
Smol_03_487	Smøla_2003	115	115	192	192	96	100	123	132	121	125	148	184	100	100	1
Smol_03_488	Smøla_2003	111	119	192	192	92	96	126	126	115	135	160	164	100	100	2
Smol_03_489	Smøla_2003	107	115	192	192	92	100	129	135	125	151	156	172	100	100	1
Smol_03_490	Smøla_2003	113	119	192	192	96	96	129	135	115	141	152	184	100	100	2
Smol_03_491	Smøla_2003	107	107	192	192	92	96	126	132	133	145	180	184	100	100	1
Smol_03_492	Smøla_2003	111	115	192	192	92	96	126	129	123	135	172	204	100	100	1
Smol_03_493	Smøla_2003	105	111	192	192	92	96	135	138	123	125	156	208	100	100	1
Smol_03_494	Smøla_2003	107	107	192	192	96	100	132	138	145	157	164	184	100	100	1
Smol_03_495	Smøla_2003	109	109	192	192	96	100	132	132	131	131	184	196	100	100	1
Smol_03_496	Smøla_2003	107	113	192	192	92	96	135	141	115	117	172	200	100	100	1
Smol_03_497	Smøla_2003	105	107	180	192	96	108	123	138	137	143	148	152	100	100	1
Alfj_04_01	Ålfjord_2004	107	107	192	192	96	96	126	126	115	143	180	204	100	104	1
Alfj_04_02	Ålfjord_2004	107	109	192	192	96	96	126	141	131	141	160	160	100	100	1
Alfj_04_03	Ålfjord_2004	115	119	192	192	96	112	126	135	115	149	164	164	100	100	1
Alfj_04_04	Ålfjord_2004	107	111	192	196	92	100	126	141	115	143	176	176	100	100	1
Alfj_04_05	Ålfjord_2004	109	119	192	192	92	96	123	129	137	151	152	196	100	100	1
Alfj_04_06	Ålfjord_2004	107	111	192	192	96	100	126	135	115	135	156	168	100	100	1
Alfj_04_07	Ålfjord_2004	109	111	192	192	96	96	123	129	115	125	160	188	100	100	1
Alfj_04_08	Ålfjord_2004	107	121	192	196	96	104	132	135	133	133	180	180	100	100	1
Alfj_04_09	Ålfjord_2004	109	113	184	192	96	100	126	138	139	143	160	208	100	100	1
Alfj_04_10	Ålfjord_2004	107	113	192	196	96	100	126	135	137	141	148	152	100	100	1
Alfj_04_11	Ålfjord_2004	111	115	192	192	96	100	126	129	139	141	160	172	100	100	1
Alfj_04_12	Ålfjord_2004	107	141	192	192	96	108	132	132	115	145	176	204	100	100	1
Alfj_04_13	Ålfjord_2004	117	119	192	192	96	108	129	135	133	157	180	192	100	100	1
Alfj_04_14	Ålfjord_2004	107	117	192	192	96	96	132	141	133	137	180	188	100	100	1
Alfj_04_15	Ålfjord_2004	107	113	184	192	92	96	126	129	121	133	172	196	100	100	1
Alfj_04_16	Ålfjord_2004	107	117	192	192	92	96	135	141	139	139	180	200	100	100	1
Alfj_04_17	Ålfjord_2004	107	117	192	192	96	100	126	141	135	143	164	192	100	100	1
Alfj_04_18	Ålfjord_2004	113	115	188	192	92	92	126	129	135	135	172	176	100	100	1
Alfj_04_19	Ålfjord_2004	113	113	192	192	96	112	126	129	115	121	160	176	100	100	1
Alfj_04_21	Ålfjord_2004	107	107	192	196	92	96	123	129	115	137	176	196	100	100	1
Alfj_04_22	Ålfjord_2004	107	107	192	192	96	100	129	129	115	115	176	188	100	100	1
Alfj_04_23	Ålfjord_2004	109	117	188	192	96	96	129	135	117	145	148	200	100	100	1
Alfj_04_24	Ålfjord_2004	107	117	192	192	92	96	132	141	115	139	156	168	100	100	1
Alfj_04_25	Ålfjord_2004	107	113	192	192	92	112	126	141	115	139	168	196	100	100	1
Alfj_04_26	Ålfjord_2004	113	115	192	192	96	96	126	132	135	143	160	204	100	100	1
Alfj_04_27	Ålfjord_2004	107	113	192	192	96	96	123	135	115	159	172	172	100	100	1
Alfj_04_28	Ålfjord_2004	107	119	192	192	92	100	123	132	115	133	152	196	100	100	1
Alfj_04_29	Ålfjord_2004	139	141	192	192	92	96	132	135	115	133	184	196	100	100	1
Alfj_04_30	Ålfjord_2004	107	107	192	192	96	104	132	135	115	137	168	180	100	100	1
Alfj_04_32	Ålfjord_2004	117	117	192	192	96	96	135	135	115	137	160	200	100	100	1
Alfj_04_33	Ålfjord_2004	107	119	192	192	96	96	126	135	115	115	156	184	100	100	1
Alfj_04_35	Ålfjord_2004	109	113	192	196	96	96	126	126	141	147	176	200	100	100	1
Alfj_04_36	Ålfjord_2004	107	119	192	192	92	96	126	132	143	209	192	192	100	100	1
Alfj_04_37	Ålfjord_2004	107	107	192	192	96	96	126	132	115	131	156	192	100	100	1
Alfj_04_38	Ålfjord_2004	107	113	192	192	96	100	132	138	115	131	156	176	100	100	1
Alfj_04_39	Ålfjord_2004	113	113	192	192	96	96	129	135	115	115	192	204	100	100	1
Alfj_04_40	Ålfjord_2004	107	109	192	192	92	104	126	129	115	135	160	200	100	100	1
Alfj_04_41	Ålfjord_2004	107	121	192	192	96	100	138	141	115	115	172	192	100	100	1
Alfj_04_42	Ålfjord_2004	107	111	192	192	100	100	129	141	115	119	180	180	100	100	1
Alfj_04_43	Ålfjord_2004	107	115	192	192	104	112	126	132	115	139	128	128	100	100	1
Alfj_04_44	Ålfjord_2004	113	141	192	192	96	100	129	141	115	145	176	188	100	100	1
Alfj_04_45	Ålfjord_2004	111	119	192	192	96	96	129	138	131	141	188	188	100	100	1
Alfj_04_46	Ålfjord_2004	107	107	192	192	100	112	129	129	115	153	156	156	100	100	1
Alfj_04_47	Ålfjord_2004	113	117	192	192	96	104	126	135	115	151	164	192	100	100	1
Alfj_04_49	Ålfjord_2004	107	109	192	192	96	100	126	135	115	139	172	184	100	100	1
Alfj_04_51	Ålfjord_2004	107	109	192	192	92	96	129	141	135	145	160	184	100	100	1
Alfj_04_52	Ålfjord_2004	107	123	192	192	92	96	123	132	115	133	184	184	100	100	1
Alfj_04_53	Ålfjord_2004	119	119	192	192	96	96	129	141	115	129	164	172	100	100	1
Alfj_04_54	Ålfjord_2004	107	113	192	192	108	108	123	135	115	143	192	192	100	100	1
Alfj_04_55	Ålfjord_2004	107	141	192	192	96	96	132	132	115	133	172	184	100	100	1
Alfj_04_56	Ålfjord_2004	107	107	192	192	96	104	132	132	125	145	168	172	100	100	1
Alfj_04_57	Ålfjord_2004	107	111	192	192	96	100	126	138	135	141	152	172	100	100	1
Alfj_04_58	Ålfjord_2004	107	109	192	196	112	112	129	141	115	139	172	188	100	100	1
Alfj_04_59	Ålfjord_2004	107	109	192	196	96	96	126	129	129	137	176	180	100	100	1
Alfj_04_60	Ålfjord_2004	105	119	192	192	84	92	129	138	115	145	156	188	100	100	1
Alfj_04_61	Ålfjord_2004	109	113	192	192	96	104	129	129	135	135	172	172	100	100	1
Alfj_04_62	Ålfjord_2004	109	121	192	192	96	108	129	141	125	149	160	184	100	100	1
Alfj_04_63	Ålfjord_2004	105	107	192	192	96	96	132	138	115	145	192	192	100	100	1
Alfj_04_64	Ålfjord_2004	107	109	192	192	96	96	126	138	115	143	184	204	100	100	1
Alfj_04_65	Ålfjord_2004	107	111	192	192	96	96	129	138	115	137	164	180	100	100	1
Alfj_04_66	Ålfjord_2004	109	113	192	196	96	104	138	141	135	135	180	188	100	100	1
Alfj_04_67	Ålfjord_2004	109	111	192	192	96	96	126	129	125	147	156	184	100	100	1
Alfj_04_68	Ålfjord_2004	107	107	192	192	96	112	126	129	115	121	184	188	100	100	1
Alfj_04_69	Ålfjord_2004	113	119	192	196	96	96	123	141	115	137	184	188	100	100	1
Alfj_04_71	Ålfjord_2004	113	117	188	192	96	96	138	141	115	133	160	180	100	100	1
Alfj_04_72	Ålfjord_2004	107	109	192	192	92	104	126	132	135	143	152	152	100	100	1
Alfj_04_73	Ålfjord_2004	107	111	192	192	96	100	126	135	115	139	160	160	100	100	1
Alfj_04_74	Ålfjord_2004	107	117	192	192	96	100	129	132	137	145	180	192	100	100	1
Alfj_04_75	Ålfjord_2004	111	111	192	192	92	96	126	138	115	145	156	168	100	100	1
Alfj_04_76	Ålfjord_2004	107	111	188	192	92	96	129	138	115	145	180	204	100	100	1
Alfj_04_77	Ålfjord_2004	107	113	192	192	96	100	132	138	115	131	172	176	100	100	1
Alfj_04_78	Ålfjord_2004	107	117	192	192	84	92	126	132	125	139	160	200	100	100	1
Alfj_04_79	Ålfjord_2004	119	119	192	192	96	96	126	132	115	155	156	160	100	100	1
Alfj_04_80	Ålfjord_2004	109	109	192	192	92	96	135	135	115	125	156	156	100	100	1
Alfj_04_81	Ålfjord_2004	109	117	192	192	96	96	126	126	137	137	188	192	100	100	1
Alfj_04_82	Ålfjord_2004	113	119	192	192	92	108	126	135	115	143	148	180	100	100	1
Alfj_04_83	Ålfjord_2004	113	119	168	192	96	104	126	138	145	147	184	192	100	100	1
Alfj_04_84	Ålfjord_2004	113	119	192	192	96	96	129	132	137	147	164	188	100	100	1
Alfj_04_85	Ålfjord_2004	107	119	192	192	96	100	123	126	121	131	160	172	100	100	1
Alfj_04_86	Ålfjord_2004	109	117	192	196	92	96	132	132	139	143	148	160	100	100	1
Alfj_04_87	Ålfjord_2004	111	113	192	192	96	96	126	126	139	143	164	172	100	100	1
Alfj_04_88	Ålfjord_2004	113	117	192	192	96	96	126	132	139	143	160	176	100	100	1
Alfj_04_89	Ålfjord_2004	109	119	188	192	92	96	126	132	137	139	168	172	100	100	1
Alfj_04_90	Ålfjord_2004	119	125	192	196	96	96	126	132	137	137	180	180	100	100	1
Alfj_04_91	Ålfjord_2004	109	113	192	192	92	104	120	138	115	153	156	164	100	100	1
Alfj_04_92	Ålfjord_2004	109	113	192	192	92	96	120	138	115	153	156	164	100	100	1
Alfj_04_93	Ålfjord_2004	107	109	192	192	100	104	132	138	115	119	168	188	100	100	1
Alfj_04_94	Ålfjord_2004	113	115	192	192	96	96	129	138	115	137	156	172	100	100	1
Alfj_04_95	Ålfjord_2004	107	119	192	192	84	96	126	141	139	141	188	192	100	100	1
Kollt_04_01	Kolltveitosen_2004	105	113	192	196	96	100	120	135	115	115	172	184	100	100	1
Kollt_04_02	Kolltveitosen_2004	109	113	192	192	96	96	129	129	139	145	160	180	100	104	1
Kollt_04_03	Kolltveitosen_2004	107	113	188	192	96	100	126	132	137	145	156	176	100	100	1
Kollt_04_04	Kolltveitosen_2004	107	111	192	192	92	112	123	126	145	151	176	200	100	100	1
Kollt_04_05	Kolltveitosen_2004	107	113	192	196	96	96	129	141	115	119	148	204	100	100	1
Kollt_04_06	Kolltveitosen_2004	107	117	192	196	96	96	126	129	137	143	192	196	100	100	1
Kollt_04_09	Kolltveitosen_2004	105	119	192	192	96	100	126	141	115	139	168	196	100	100	1
Kollt_04_10	Kolltveitosen_2004	119	119	188	192	96	112	126	129	115	115	148	204	100	100	1
Kollt_04_11	Kolltveitosen_2004	107	107	188	192	96	96	129	135	115	153	172	192	100	100	1
Kollt_04_12	Kolltveitosen_2004	115	117	192	192	96	108	132	138	137	137	172	180	100	100	1
Kollt_04_13	Kolltveitosen_2004	107	109	192	192	96	96	132	138	115	115	160	192	100	100	1
Kollt_04_14	Kolltveitosen_2004	113	113	192	192	96	96	129	129	119	137	160	204	100	100	1
Kollt_04_15	Kolltveitosen_2004	107	109	192	196	96	100	138	138	115	131	164	172	100	100	1
Kollt_04_16	Kolltveitosen_2004	113	121	192	192	96	100	129	138	135	135	180	200	100	100	1
Kollt_04_17	Kolltveitosen_2004	109	119	192	192	96	112	135	144	115	141	156	188	100	100	1
Kollt_04_18	Kolltveitosen_2004	113	141	192	192	92	92	123	123	145	145	160	172	100	100	1
Kollt_04_19	Kolltveitosen_2004	111	117	192	192	104	108	126	129	155	201	180	180	100	100	1
Kollt_04_20	Kolltveitosen_2004	113	113	192	192	92	104	126	129	125	131	192	200	100	100	1
Kollt_04_21	Kolltveitosen_2004	107	107	192	192	92	100	126	126	137	155	148	172	100	100	1
Kollt_04_22	Kolltveitosen_2004	107	109	192	192	92	96	138	141	137	145	160	208	100	100	1
Kollt_04_23	Kolltveitosen_2004	107	119	192	192	96	96	126	129	115	145	172	192	100	100	1
Kollt_04_24	Kolltveitosen_2004	107	113	188	192	96	96	138	141	115	135	164	184	100	100	1
Kollt_04_26	Kolltveitosen_2004	107	113	192	192	96	100	126	129	115	135	176	188	100	100	1
Kollt_04_27	Kolltveitosen_2004	107	117	192	192	96	96	123	141	137	215	164	204	100	100	1
Kollt_04_28	Kolltveitosen_2004	107	129	192	192	96	96	129	138	121	159	160	164	100	100	1
Kollt_04_29	Kolltveitosen_2004	107	119	192	192	92	96	129	132	137	157	172	172	100	104	1
Kollt_04_30	Kolltveitosen_2004	107	111	192	192	96	96	120	135	115	139	160	172	100	100	1
Kollt_04_31	Kolltveitosen_2004	107	113	192	192	88	96	129	135	133	157	180	196	100	100	1
Kollt_04_32	Kolltveitosen_2004	107	109	192	192	96	100	126	129	115	115	160	168	100	104	1
Kollt_04_33	Kolltveitosen_2004	111	117	188	192	96	112	123	126	115	133	164	172	100	100	1
Kollt_04_34	Kolltveitosen_2004	109	119	192	192	92	100	135	138	115	137	172	176	100	100	1
Kollt_04_35	Kolltveitosen_2004	107	115	192	192	100	108	132	135	127	145	160	192	100	100	1
Kollt_04_36	Kolltveitosen_2004	105	113	192	192	96	96	126	132	115	115	172	172	104	104	2
Kollt_04_37	Kolltveitosen_2004	107	113	192	192	96	104	126	129	115	147	160	164	100	100	1
Kollt_04_38	Kolltveitosen_2004	107	113	192	192	92	96	123	126	137	137	168	184	100	100	1
Kollt_04_39	Kolltveitosen_2004	115	121	192	192	96	96	132	135	115	125	176	188	100	100	1
Kollt_04_40	Kolltveitosen_2004	107	115	192	192	96	100	138	138	115	129	160	184	100	100	1
Kollt_04_41	Kolltveitosen_2004	107	107	192	192	92	96	126	129	115	123	192	208	100	100	1
Kollt_04_42	Kolltveitosen_2004	109	109	192	196	100	104	123	132	137	139	188	204	100	100	1
Kollt_04_43	Kolltveitosen_2004	111	119	192	196	92	96	135	138	123	143	156	168	100	100	1
Kollt_04_44	Kolltveitosen_2004	107	123	192	192	96	108	126	132	125	137	156	200	100	100	1
Kollt_04_45	Kolltveitosen_2004	113	117	192	192	92	100	126	132	133	135	180	196	100	100	1
Kollt_04_46	Kolltveitosen_2004	105	109	192	192	96	112	126	129	115	141	172	184	100	100	1
Kollt_04_47	Kolltveitosen_2004	113	125	192	192	92	96	132	141	143	147	160	176	100	100	1
Kollt_04_48	Kolltveitosen_2004	107	119	188	192	96	96	123	150	141	155	160	176	100	104	1
Kollt_04_49	Kolltveitosen_2004	107	107	192	192	96	108	138	138	125	139	160	192	100	100	1
Kollt_04_50	Kolltveitosen_2004	113	117	192	192	96	104	126	126	131	137	172	204	100	100	1
Kollt_04_51	Kolltveitosen_2004	109	117	192	192	96	96	126	132	115	137	172	196	100	100	1
Kollt_04_52	Kolltveitosen_2004	105	113	192	192	96	100	126	126	141	163	180	188	100	100	1
Kollt_04_53	Kolltveitosen_2004	107	119	192	196	96	96	126	132	141	147	164	164	100	100	1
Kollt_04_54	Kolltveitosen_2004	107	109	192	196	108	108	126	129	115	147	156	176	100	100	1
Kollt_04_55	Kolltveitosen_2004	111	113	192	192	96	96	123	129	145	147	164	180	100	100	1
Kollt_04_56	Kolltveitosen_2004	111	111	192	192	96	96	126	138	143	157	152	184	100	100	1
Kollt_04_57	Kolltveitosen_2004	107	123	192	192	96	96	126	129	125	139	188	204	100	100	1
Kollt_04_58	Kolltveitosen_2004	107	117	184	196	92	96	132	135	123	137	168	184	100	100	1
Borg_04_01	Borgunfjord_2004	107	113	192	192	96	96	138	138	125	137	172	180	100	100	1
Borg_04_02	Borgunfjord_2004	107	113	192	192	96	96	126	135	115	131	160	196	100	100	1
Borg_04_03	Borgunfjord_2004	109	119	192	192	96	96	129	135	115	131	176	188	100	100	1
Borg_04_04	Borgunfjord_2004	107	111	192	192	92	104	138	141	137	147	172	184	100	100	1
Borg_04_05	Borgunfjord_2004	111	131	192	192	92	96	126	126	121	135	184	192	100	100	1
Borg_04_06	Borgunfjord_2004	117	121	192	192	92	96	123	129	117	121	176	184	100	100	1
Borg_04_07	Borgunfjord_2004	107	117	192	192	92	100	123	126	115	137	172	184	100	100	1
Borg_04_09	Borgunfjord_2004	119	119	192	192	96	96	126	138	115	115	156	188	100	104	1
Borg_04_10	Borgunfjord_2004	117	119	192	196	96	108	126	126	115	139	176	176	100	100	1
Borg_04_11	Borgunfjord_2004	107	107	192	192	92	96	129	132	143	147	196	200	100	100	1
Borg_04_12	Borgunfjord_2004	113	115	192	192	92	96	126	126	139	145	164	188	100	100	1
Borg_04_13	Borgunfjord_2004	109	119	192	192	88	96	129	138	133	137	172	196	100	100	1
Borg_04_14	Borgunfjord_2004	107	109	192	192	96	112	126	129	117	135	156	192	100	100	1
Borg_04_15	Borgunfjord_2004	113	113	192	192	96	108	126	138	115	133	168	188	100	100	1
Borg_04_16	Borgunfjord_2004	119	129	192	192	96	100	129	141	115	129	172	176	100	104	1
Borg_04_17	Borgunfjord_2004	117	141	192	192	96	96	126	138	115	135	156	184	100	104	1
Borg_04_19	Borgunfjord_2004	107	109	192	192	92	100	129	129	115	133	180	200	100	100	1
Borg_04_20	Borgunfjord_2004	119	123	192	192	96	112	126	135	143	145	180	180	100	100	1
Borg_04_21	Borgunfjord_2004	107	107	192	208	96	100	126	129	115	141	184	204	100	104	1
Borg_04_22	Borgunfjord_2004	109	113	192	192	96	96	129	132	115	115	164	204	100	100	1
Borg_04_24	Borgunfjord_2004	109	113	192	192	96	104	126	129	137	143	164	200	100	100	1
Borg_04_25	Borgunfjord_2004	107	111	192	192	100	108	126	126	115	139	124	188	100	100	1
Borg_04_27	Borgunfjord_2004	113	115	192	192	96	104	123	129	131	137	176	192	100	100	1
Borg_04_29	Borgunfjord_2004	107	113	192	196	96	100	123	126	119	133	188	188	100	100	1
Borg_04_30	Borgunfjord_2004	105	119	192	192	92	96	123	123	115	153	160	196	100	104	1
Borg_04_31	Borgunfjord_2004	111	119	188	192	96	96	126	129	117	117	144	172	100	104	1
Borg_04_32	Borgunfjord_2004	107	107	192	196	92	92	135	135	113	113	160	172	100	100	1
Borg_04_34	Borgunfjord_2004	107	141	192	192	96	100	132	135	139	167	160	164	100	100	1
Borg_04_35	Borgunfjord_2004	111	141	192	192	92	100	129	129	117	145	164	180	100	100	1
Borg_04_36	Borgunfjord_2004	107	113	192	192	96	108	129	132	113	113	160	204	100	104	2
Borg_04_37	Borgunfjord_2004	119	121	192	192	96	100	126	132	125	125	172	172	100	100	1
Borg_04_38	Borgunfjord_2004	113	129	192	192	96	96	135	138	119	119	164	164	100	100	1
Borg_04_40	Borgunfjord_2004	105	113	192	192	92	96	132	135	121	145	140	180	100	104	2
Borg_04_41	Borgunfjord_2004	109	109	192	192	96	100	120	132	115	137	172	184	100	104	1
Borg_04_42	Borgunfjord_2004	109	119	188	192	96	96	123	138	115	135	172	192	100	100	1
Borg_04_43	Borgunfjord_2004	113	117	192	192	92	96	126	138	137	139	188	204	100	100	1
Borg_04_44	Borgunfjord_2004	119	119	192	192	96	100	129	132	125	125	180	200	100	100	1
Borg_04_45	Borgunfjord_2004	105	119	192	192	96	100	126	129	113	113	172	180	100	104	2
Borg_04_46	Borgunfjord_2004	107	111	196	196	96	108	129	132	113	113	156	188	100	100	1
Borg_04_47	Borgunfjord_2004	113	119	192	192	96	96	123	138	137	151	156	172	100	100	1
Borg_04_48	Borgunfjord_2004	105	113	192	192	96	96	129	141	153	159	132	180	100	100	1
Borg_04_49	Borgunfjord_2004	107	111	192	192	96	96	126	147	115	135	180	192	100	100	1
Borg_04_50	Borgunfjord_2004	105	113	192	192	96	100	126	132	115	147	184	192	100	104	1
Borg_04_51	Borgunfjord_2004	107	113	180	192	96	108	126	132	115	141	156	188	100	100	1
Borg_04_52	Borgunfjord_2004	113	121	192	192	96	96	135	135	115	129	152	168	100	104	1
Borg_04_53	Borgunfjord_2004	109	113	192	192	96	96	132	138	119	155	152	180	100	100	1
Borg_04_54	Borgunfjord_2004	111	113	188	192	96	108	126	138	125	153	164	196	100	100	1
Borg_04_55	Borgunfjord_2004	105	107	188	196	96	96	135	138	117	135	164	168	100	104	1
Borg_04_56	Borgunfjord_2004	103	117	192	192	96	100	126	129	115	139	176	180	100	100	1
Borg_04_57	Borgunfjord_2004	107	119	192	192	92	108	126	129	121	137	152	204	100	100	1
Borg_04_58	Borgunfjord_2004	107	113	192	196	96	96	132	132	137	155	184	188	100	100	1
Borg_04_59	Borgunfjord_2004	107	117	192	196	96	104	129	138	115	115	156	196	100	100	1
Borg_04_60	Borgunfjord_2004	117	141	192	192	92	108	132	138	133	139	156	156	100	100	1
Borg_04_61	Borgunfjord_2004	105	107	192	192	96	96	132	132	115	147	168	196	104	104	1
Borg_04_62	Borgunfjord_2004	105	107	192	192	96	100	126	135	115	135	196	200	100	104	1
Borg_04_63	Borgunfjord_2004	107	123	192	192	92	96	126	138	137	153	172	200	100	100	1
Borg_04_64	Borgunfjord_2004	109	111	188	196	96	96	123	135	115	139	160	188	100	104	1
Borg_04_65	Borgunfjord_2004	107	107	192	192	96	96	123	126	115	167	168	184	100	104	1
Borg_04_66	Borgunfjord_2004	109	117	192	192	92	92	129	141	115	145	140	196	100	100	1
Borg_04_67	Borgunfjord_2004	115	119	192	192	96	96	132	138	115	143	176	180	100	100	1
Borg_04_68	Borgunfjord_2004	109	113	196	196	96	96	132	135	115	139	156	172	100	100	1
Borg_04_69	Borgunfjord_2004	109	113	192	192	100	112	126	129	133	147	156	184	100	100	1
Borg_04_70	Borgunfjord_2004	107	115	192	192	96	96	126	129	115	115	188	204	100	100	1
Borg_04_72	Borgunfjord_2004	107	107	192	192	100	108	123	135	115	127	172	188	100	100	1
Borg_04_73	Borgunfjord_2004	113	117	188	192	96	112	129	132	115	141	188	200	100	100	1
Borg_04_74	Borgunfjord_2004	111	115	192	192	100	100	132	138	121	121	164	192	100	100	1
Borg_04_75	Borgunfjord_2004	107	113	192	192	96	96	135	135	117	137	172	184	100	100	1
Borg_04_76	Borgunfjord_2004	109	111	192	192	96	96	129	135	115	125	160	168	100	100	1
Borg_04_77	Borgunfjord_2004	107	113	192	208	96	112	129	129	143	155	172	204	100	100	1
Borg_04_78	Borgunfjord_2004	105	115	192	192	96	100	132	135	115	135	156	180	100	100	1
Borg_04_87	Borgunfjord_2004	107	117	192	196	100	108	126	126	115	153	164	192	100	100	1
Borg_04_88	Borgunfjord_2004	113	123	192	200	96	100	126	126	141	147	160	184	100	100	1
Borg_04_89	Borgunfjord_2004	109	117	192	192	96	104	129	138	137	145	176	176	100	100	1
Borg_04_90	Borgunfjord_2004	111	141	192	196	96	104	126	141	139	145	176	176	100	100	1
Borg_04_91	Borgunfjord_2004	109	109	192	196	96	96	126	138	115	143	172	176	100	100	1
Borg_04_92	Borgunfjord_2004	107	113	192	192	96	100	129	132	135	141	140	164	100	104	1
Borg_04_93	Borgunfjord_2004	107	113	192	196	96	100	126	135	115	123	152	184	100	100	1
Borg_04_94	Borgunfjord_2004	111	115	192	192	96	96	126	129	115	135	164	204	100	100	1
Borg_04_95	Borgunfjord_2004	107	115	192	192	96	104	135	135	115	135	176	176	100	100	1
Borg_04_96	Borgunfjord_2004	107	109	184	192	96	100	135	135	115	139	156	164	100	100	1
Borg_04_97	Borgunfjord_2004	113	113	192	192	96	96	126	126	135	147	160	172	100	100	1
Borg_04_98	Borgunfjord_2004	111	115	192	192	96	112	129	135	125	143	176	192	100	100	1
Borg_04_99	Borgunfjord_2004	109	113	192	196	92	100	132	138	115	139	188	204	100	100	1
Borg_04_100	Borgunfjord_2004	107	107	192	192	100	108	126	126	115	139	192	204	100	100	1
Borg_04_101	Borgunfjord_2004	111	113	192	200	92	96	123	126	137	141	180	192	100	100	1
Borg_04_102	Borgunfjord_2004	113	117	192	192	96	100	129	135	99	135	160	196	100	100	1
Borg_04_103	Borgunfjord_2004	107	113	192	192	92	112	126	126	115	131	172	192	100	100	1
Borg_04_104	Borgunfjord_2004	113	113	192	192	92	104	138	147	115	139	172	184	100	100	1
Borg_04_105	Borgunfjord_2004	111	119	192	192	92	108	132	132	137	161	160	200	100	100	1
Borg_04_106	Borgunfjord_2004	107	113	192	196	92	96	123	126	133	147	176	180	100	100	1
Borg_04_107	Borgunfjord_2004	107	119	192	192	84	96	129	129	115	133	172	204	100	104	1
Borg_04_108	Borgunfjord_2004	113	119	180	196	96	100	138	138	145	145	176	200	100	104	2
Borg_04_110	Borgunfjord_2004	107	113	192	196	96	96	126	141	133	147	156	164	100	104	1
Borg_04_119	Borgunfjord_2004	107	113	192	192	100	100	138	138	135	145	160	172	100	100	1
Borg_04_120	Borgunfjord_2004	107	107	192	192	96	96	129	132	115	155	152	152	100	104	1
Borg_04_121	Borgunfjord_2004	113	115	192	192	96	96	132	132	137	141	176	200	100	100	1
Borg_04_122	Borgunfjord_2004	107	113	192	192	96	100	129	135	115	131	156	196	100	104	1
Borg_04_123	Borgunfjord_2004	111	113	192	192	96	100	129	132	115	145	172	180	100	100	1
Borg_04_124	Borgunfjord_2004	107	141	192	192	96	96	129	138	115	115	184	196	100	104	1
Borg_04_125	Borgunfjord_2004	113	129	192	192	96	96	126	126	137	139	164	196	100	100	1
Borg_04_126	Borgunfjord_2004	107	113	192	192	96	96	126	135	137	139	184	208	100	100	1
Borg_04_127	Borgunfjord_2004	107	113	192	192	96	104	135	138	115	151	156	160	100	104	1
Borg_04_128	Borgunfjord_2004	111	121	192	192	92	96	126	126	115	143	172	200	100	100	1
Borg_04_129	Borgunfjord_2004	107	119	192	192	96	104	126	129	115	117	172	192	100	100	1
Borg_04_130	Borgunfjord_2004	107	133	192	192	96	96	129	135	143	143	172	172	100	104	1
Borg_04_131	Borgunfjord_2004	113	115	192	192	96	96	126	135	115	137	164	184	100	100	1
Borg_04_132	Borgunfjord_2004	119	119	192	196	84	92	126	126	141	147	172	172	100	100	1
Borg_04_133	Borgunfjord_2004	109	109	192	192	96	112	123	129	115	137	180	208	100	104	1
Borg_04_135	Borgunfjord_2004	111	113	184	192	96	104	123	129	129	131	164	192	100	100	1
Borg_04_136	Borgunfjord_2004	113	117	192	192	96	100	126	129	125	143	172	188	100	100	1
Borg_04_137	Borgunfjord_2004	107	113	184	188	96	96	123	129	115	139	164	184	100	100	1
Borg_04_138	Borgunfjord_2004	111	113	192	192	96	96	126	138	139	141	184	208	100	104	1
Borg_04_139	Borgunfjord_2004	107	113	192	192	92	96	123	126	115	137	176	200	100	100	1
Borg_04_140	Borgunfjord_2004	115	115	192	192	92	96	132	135	139	147	156	172	100	100	1
Borg_04_141	Borgunfjord_2004	107	119	188	192	92	112	129	129	135	139	156	168	100	100	1
Borg_04_142	Borgunfjord_2004	107	119	192	192	96	104	132	135	141	149	156	180	100	104	1
Borg_04_145	Borgunfjord_2004	105	117	192	192	100	104	126	126	99	115	188	204	100	100	1
Borg_04_146	Borgunfjord_2004	107	117	192	192	96	96	129	135	135	135	160	168	100	100	1
Borg_04_147	Borgunfjord_2004	113	117	192	192	96	96	132	138	135	137	160	196	100	100	1
Borg_04_148	Borgunfjord_2004	113	119	192	192	96	96	126	129	137	143	156	172	100	104	1
Borg_04_149	Borgunfjord_2004	117	119	168	192	96	96	123	132	115	135	152	160	100	100	1
Borg_04_150	Borgunfjord_2004	107	113	192	192	96	108	129	138	115	153	164	204	100	100	1
Borg_04_151	Borgunfjord_2004	105	107	192	192	100	100	129	132	137	143	176	184	100	100	1
Borg_04_152	Borgunfjord_2004	105	109	188	192	96	96	126	126	129	131	168	192	100	100	1
Borg_04_153	Borgunfjord_2004	113	119	192	192	92	92	129	135	115	147	176	176	100	100	1
Borg_04_155	Borgunfjord_2004	109	113	192	192	96	100	126	126	133	137	180	180	100	100	1
Borg_04_156	Borgunfjord_2004	107	117	192	192	92	96	129	141	115	145	160	160	100	100	1
Borg_04_157	Borgunfjord_2004	113	113	192	192	96	104	129	132	139	143	180	180	100	100	1
Borg_04_158	Borgunfjord_2004	107	111	192	192	92	96	123	132	135	145	164	200	100	100	1
Godo_04_02	Godøy_2004	105	113	192	192	96	100	126	129	115	143	156	164	100	100	1
Godo_04_05	Godøy_2004	107	119	192	192	92	96	129	132	115	145	180	196	100	100	1
Godo_04_06	Godøy_2004	113	117	192	192	96	96	126	138	137	141	172	180	100	104	1
Godo_04_07	Godøy_2004	107	109	192	192	96	96	126	135	115	115	172	188	104	104	2
Godo_04_08	Godøy_2004	107	145	192	192	96	96	126	129	117	137	180	184	100	100	1
Godo_04_09	Godøy_2004	113	141	192	192	92	92	138	141	115	159	168	188	100	100	1
Godo_04_10	Godøy_2004	107	113	192	192	100	104	126	126	119	135	148	172	100	100	1
Godo_04_12	Godøy_2004	117	119	192	192	96	96	123	132	115	139	168	180	100	100	1
Godo_04_13	Godøy_2004	107	121	192	192	92	96	129	135	115	145	156	172	100	104	1
Godo_04_14	Godøy_2004	107	111	192	192	96	96	126	129	115	145	180	180	100	104	1
Godo_04_15	Godøy_2004	105	107	192	192	96	96	132	138	125	137	160	164	100	100	1
Godo_04_16	Godøy_2004	107	119	168	192	92	100	129	132	117	135	128	188	100	100	1
Godo_04_17	Godøy_2004	107	113	192	192	92	96	129	132	125	137	140	160	100	104	1
Godo_04_18	Godøy_2004	107	115	192	192	96	96	129	129	115	125	156	180	100	104	1
Godo_04_19	Godøy_2004	107	113	192	192	92	96	126	126	115	121	172	172	100	100	1
Godo_04_20	Godøy_2004	107	107	192	192	84	96	129	138	115	135	180	200	100	104	1
Godo_04_21	Godøy_2004	115	115	192	192	104	104	138	138	115	147	156	168	100	100	1
Godo_04_22	Godøy_2004	115	119	192	192	96	100	123	135	115	117	160	184	100	104	1
Godo_04_23	Godøy_2004	115	137	188	192	104	104	129	129	115	125	156	164	100	100	1
Godo_04_25	Godøy_2004	107	109	192	192	96	96	123	132	115	135	176	184	100	104	1
Godo_04_27	Godøy_2004	107	113	192	192	96	96	126	132	119	121	188	188	104	104	2
Godo_04_28	Godøy_2004	107	113	192	196	92	96	132	135	141	147	188	192	100	100	1
Godo_04_31	Godøy_2004	113	117	192	192	96	96	126	138	125	135	184	184	100	100	1
Godo_04_32	Godøy_2004	111	117	192	192	96	96	138	138	115	139	176	200	100	104	1
Godo_04_34	Godøy_2004	105	119	192	192	96	96	129	138	121	121	180	204	100	104	1
Godo_04_35	Godøy_2004	107	109	192	192	96	104	129	129	115	147	152	176	100	100	1
Godo_04_36	Godøy_2004	113	141	192	196	96	100	129	129	115	165	144	196	100	104	1
Godo_04_37	Godøy_2004	117	117	192	192	92	96	129	132	115	115	196	196	100	104	1
Godo_04_38	Godøy_2004	109	113	192	192	96	96	129	129	115	119	156	156	100	100	1
Godo_04_39	Godøy_2004	109	111	192	192	96	96	126	132	115	121	184	196	100	104	1
Godo_04_40	Godøy_2004	113	113	192	192	96	96	135	141	117	149	184	200	100	100	1
Godo_04_42	Godøy_2004	109	113	188	192	92	96	123	135	119	145	152	176	100	100	1
Godo_04_43	Godøy_2004	107	107	192	192	96	100	126	135	137	149	168	188	100	100	1
Godo_04_44	Godøy_2004	113	141	192	196	96	100	129	129	115	143	176	184	100	100	1
Godo_04_45	Godøy_2004	111	119	188	192	96	100	120	132	115	115	148	196	100	100	1
Godo_04_47	Godøy_2004	115	117	192	192	96	100	126	135	117	145	156	188	100	100	1
Godo_04_48	Godøy_2004	107	115	192	192	92	96	129	138	115	139	192	192	100	100	1
Godo_04_49	Godøy_2004	105	107	192	196	92	96	126	138	119	203	180	204	100	104	1
Godo_04_50	Godøy_2004	107	113	192	192	96	96	126	135	115	117	152	192	104	104	1
Godo_04_52	Godøy_2004	111	119	192	192	92	104	135	141	125	135	156	164	100	100	1
Godo_04_53	Godøy_2004	111	121	184	192	92	116	126	132	125	145	128	172	100	100	1
Godo_04_54	Godøy_2004	113	115	192	192	92	96	126	135	115	119	148	200	100	104	2
Godo_04_56	Godøy_2004	103	105	192	192	96	96	132	135	121	139	156	192	100	104	1
Godo_04_57	Godøy_2004	105	121	184	192	96	96	129	132	115	141	144	184	100	104	1
Godo_04_58	Godøy_2004	107	113	192	192	96	104	123	126	119	135	164	176	100	104	1
Godo_04_59	Godøy_2004	109	111	192	196	96	96	138	138	115	115	172	192	104	104	2
Godo_04_60	Godøy_2004	107	107	192	192	96	100	126	129	115	137	156	168	100	100	1
Godo_04_63	Godøy_2004	105	109	192	192	96	104	132	138	139	147	180	184	100	100	2
Godo_04_64	Godøy_2004	107	119	192	192	100	104	123	132	115	115	164	184	100	104	1
Godo_04_65	Godøy_2004	107	113	192	192	96	100	123	132	115	115	168	176	100	100	1
Godo_04_66	Godøy_2004	111	111	192	192	96	96	126	129	115	143	180	180	100	104	2
Godo_04_68	Godøy_2004	105	115	192	192	92	96	132	138	135	159	176	176	100	100	1
Godo_04_69	Godøy_2004	123	129	192	192	96	96	129	129	115	119	128	180	100	104	1
Godo_04_70	Godøy_2004	109	113	192	192	92	100	135	141	119	143	160	168	100	100	1
Godo_04_71	Godøy_2004	109	109	192	192	92	96	123	126	123	125	172	188	100	104	1
Godo_04_72	Godøy_2004	113	123	192	192	96	96	126	138	115	115	156	188	104	104	1
Godo_04_73	Godøy_2004	109	117	192	192	96	100	126	129	115	143	168	184	100	104	1
Godo_04_75	Godøy_2004	107	109	192	192	96	100	129	132	115	137	160	172	100	100	1
Godo_04_78	Godøy_2004	107	113	192	192	96	112	135	138	143	151	152	184	100	100	2
Godo_04_79	Godøy_2004	107	119	192	192	96	96	126	135	119	121	164	200	104	104	1
Godo_04_80	Godøy_2004	109	109	192	192	96	96	126	126	115	115	172	176	104	104	2
Godo_04_83	Godøy_2004	105	107	192	192	96	96	138	138	115	145	156	192	100	100	1
Godo_04_84	Godøy_2004	107	113	192	192	108	112	126	132	123	129	188	192	100	100	1
Godo_04_85	Godøy_2004	105	111	192	192	96	96	126	138	137	147	176	184	100	104	1
Godo_04_86	Godøy_2004	107	113	192	192	92	92	132	138	137	141	156	188	100	100	1
Misu_04_01	Midsund_2004	107	107	192	192	96	100	129	129	139	139	176	176	100	100	1
Misu_04_03	Midsund_2004	111	119	192	192	96	96	129	132	131	135	172	180	100	100	1
Misu_04_04	Midsund_2004	105	111	192	192	96	96	126	126	115	125	168	200	100	100	1
Misu_04_05	Midsund_2004	107	117	196	196	92	104	126	135	135	141	156	168	100	100	1
Misu_04_06	Midsund_2004	109	123	192	192	92	96	135	138	115	145	160	192	100	100	1
Misu_04_07	Midsund_2004	115	141	184	192	96	100	126	141	115	149	156	184	100	104	1
Misu_04_08	Midsund_2004	109	111	192	192	92	96	138	141	141	141	156	180	100	100	1
Misu_04_09	Midsund_2004	111	113	192	196	96	100	129	129	137	137	152	204	100	100	1
Misu_04_10	Midsund_2004	107	141	192	192	92	96	126	135	115	145	168	188	100	100	1
Misu_04_11	Midsund_2004	107	117	184	192	96	96	132	138	139	151	160	168	100	100	1
Misu_04_12	Midsund_2004	107	107	192	192	96	96	138	138	115	121	140	204	100	100	1
Misu_04_13	Midsund_2004	107	107	192	192	92	96	123	129	125	141	160	188	100	100	1
Misu_04_14	Midsund_2004	119	119	192	192	92	100	123	123	123	135	164	180	100	100	1
Misu_04_15	Midsund_2004	115	119	188	192	96	96	126	129	115	115	164	184	100	100	1
Misu_04_16	Midsund_2004	107	123	184	192	92	96	141	141	137	145	188	204	100	100	1
Misu_04_17	Midsund_2004	107	109	188	192	96	96	123	126	147	205	192	204	100	100	1
Misu_04_18	Midsund_2004	107	139	192	192	96	96	132	135	115	137	164	204	100	100	1
Misu_04_19	Midsund_2004	113	117	192	192	96	96	132	135	135	145	172	192	100	100	1
Misu_04_20	Midsund_2004	109	115	192	192	96	96	126	138	133	133	140	160	100	100	1
Misu_04_21	Midsund_2004	105	107	192	192	96	104	126	129	115	139	144	172	100	100	1
Misu_04_22	Midsund_2004	113	113	192	192	96	96	123	135	135	139	180	192	100	100	1
Misu_04_23	Midsund_2004	105	113	192	192	96	100	126	126	115	137	164	204	100	100	1
Misu_04_24	Midsund_2004	107	111	192	192	96	108	129	132	115	115	136	192	100	100	1
Misu_04_25	Midsund_2004	115	121	192	192	96	96	135	141	139	143	140	160	100	100	1
Misu_04_26	Midsund_2004	113	141	192	192	88	96	126	126	141	143	132	160	100	100	1
Misu_04_27	Midsund_2004	109	121	192	192	96	96	126	129	115	117	164	172	100	100	1
Misu_04_28	Midsund_2004	111	119	188	192	96	108	129	138	133	157	176	180	100	100	1
Misu_04_29	Midsund_2004	113	117	192	192	96	100	132	135	115	115	156	196	100	104	1
Misu_04_30	Midsund_2004	109	111	192	192	96	100	126	126	115	137	128	204	100	100	1
Misu_04_31	Midsund_2004	107	109	192	192	76	96	129	135	131	131	148	172	100	100	1
Misu_04_32	Midsund_2004	111	119	188	192	96	100	126	126	143	147	164	188	100	100	1
Misu_04_33	Midsund_2004	109	141	192	196	96	100	132	135	115	135	152	180	100	104	1
Misu_04_34	Midsund_2004	107	109	192	192	96	100	126	129	115	141	184	200	100	100	1
Misu_04_35	Midsund_2004	107	109	192	192	96	116	126	126	131	143	188	204	100	100	1
Misu_04_36	Midsund_2004	111	115	192	192	92	96	126	132	127	139	176	192	100	100	1
Misu_04_37	Midsund_2004	107	107	192	192	92	112	126	135	139	145	188	200	100	100	1
Misu_04_38	Midsund_2004	107	107	192	192	96	96	129	129	115	139	156	156	100	100	1
Misu_04_39	Midsund_2004	109	141	192	192	96	112	126	132	151	151	164	172	100	100	1
Misu_04_40	Midsund_2004	115	115	192	192	96	96	129	132	119	135	176	176	100	104	1
Misu_04_41	Midsund_2004	107	141	192	192	96	96	126	126	115	137	160	164	100	104	1
Misu_04_43	Midsund_2004	105	109	192	192	96	112	126	138	115	115	148	152	100	100	1
Misu_04_44	Midsund_2004	107	111	192	192	96	96	126	138	137	137	160	180	100	100	1
Misu_04_45	Midsund_2004	107	107	188	188	92	100	123	132	131	139	172	196	100	100	1
Misu_04_46	Midsund_2004	111	113	192	192	96	100	138	138	137	147	156	192	100	100	1
Misu_04_47	Midsund_2004	107	107	192	192	96	96	129	129	115	155	156	204	100	100	1
Misu_04_48	Midsund_2004	107	115	192	192	100	104	132	135	115	139	144	180	100	100	1
Misu_04_49	Midsund_2004	111	123	192	192	96	96	123	129	127	141	176	204	100	100	1
Misu_04_50	Midsund_2004	109	123	192	192	96	96	126	129	135	137	160	168	100	100	1
Misu_04_51	Midsund_2004	107	119	192	192	96	100	126	141	135	143	184	192	100	100	1
Misu_04_52	Midsund_2004	107	113	192	192	96	104	129	132	125	147	160	168	100	100	1
Misu_04_54	Midsund_2004	111	111	192	192	92	96	132	141	129	131	156	200	100	100	1
Misu_04_55	Midsund_2004	107	113	192	192	100	104	129	135	115	115	172	184	100	100	1
Misu_04_56	Midsund_2004	107	119	192	192	96	96	126	138	135	161	184	184	100	104	1
Misu_04_57	Midsund_2004	107	113	192	192	96	96	129	129	139	173	140	148	100	100	1
Misu_04_58	Midsund_2004	107	113	192	192	96	108	126	135	133	145	200	204	100	100	1
Misu_04_59	Midsund_2004	105	109	192	192	96	112	138	147	125	139	168	172	100	100	1
Misu_04_60	Midsund_2004	109	115	192	196	96	96	129	132	115	137	168	192	100	100	1
Misu_04_61	Midsund_2004	123	127	192	192	96	100	129	135	115	137	160	192	100	104	1
Misu_04_62	Midsund_2004	107	119	192	192	100	108	129	129	137	149	156	200	100	100	1
Misu_04_63	Midsund_2004	111	113	192	196	96	96	129	135	123	133	164	164	100	100	1
Misu_04_64	Midsund_2004	111	113	192	192	96	96	132	144	133	137	176	180	100	100	1
Misu_04_65	Midsund_2004	111	113	192	192	96	96	132	144	133	137	176	180	100	100	1
Misu_04_66	Midsund_2004	107	107	192	192	92	96	129	132	141	143	152	156	100	100	1
Misu_04_67	Midsund_2004	119	119	184	192	96	96	123	126	115	141	172	212	100	100	1
Misu_04_68	Midsund_2004	111	115	192	192	96	96	126	135	137	143	140	164	100	100	1
Misu_04_69	Midsund_2004	109	113	192	192	104	108	135	141	115	133	156	160	100	100	1
Misu_04_70	Midsund_2004	109	119	188	192	96	96	126	132	137	139	156	156	100	100	1
Misu_04_71	Midsund_2004	105	111	192	192	92	96	129	129	129	131	144	156	100	100	1
Misu_04_72	Midsund_2004	107	113	192	196	92	96	123	126	137	139	160	204	100	100	1
Buag_04_03	Buagrunn_2004	113	119	188	192	100	100	129	132	115	163	172	188	100	100	1
Buag_04_04	Buagrunn_2004	107	119	180	192	92	96	138	138	117	143	164	188	100	104	1
Buag_04_06	Buagrunn_2004	105	113	192	192	92	96	126	126	133	137	156	180	100	100	1
Buag_04_07	Buagrunn_2004	109	109	192	192	92	100	126	138	133	147	188	188	100	100	1
Buag_04_08	Buagrunn_2004	105	105	192	192	96	104	132	132	115	119	176	176	100	104	1
Buag_04_09	Buagrunn_2004	109	117	192	192	92	96	132	135	115	117	156	172	100	100	1
Buag_04_11	Buagrunn_2004	113	113	192	192	96	96	123	129	115	117	160	172	104	104	2
Buag_04_12	Buagrunn_2004	107	113	192	192	96	96	126	135	115	119	168	172	104	104	2
Buag_04_13	Buagrunn_2004	107	115	192	192	96	96	129	132	145	147	156	188	100	100	1
Buag_04_16	Buagrunn_2004	109	119	192	192	96	96	126	138	125	137	184	192	100	100	1
Buag_04_17	Buagrunn_2004	105	113	192	192	100	100	126	129	125	133	160	160	100	100	1
Buag_04_18	Buagrunn_2004	107	111	192	192	96	104	126	126	115	119	160	180	100	104	1
Buag_04_19	Buagrunn_2004	113	119	192	192	96	108	126	129	115	143	156	172	100	104	1
Buag_04_20	Buagrunn_2004	119	139	184	192	92	96	132	138	115	135	148	176	100	100	1
Buag_04_22	Buagrunn_2004	113	115	192	192	96	104	126	126	121	139	184	204	100	104	1
Buag_04_23	Buagrunn_2004	119	119	192	192	96	96	129	138	115	119	160	172	104	104	2
Buag_04_25	Buagrunn_2004	113	125	188	192	92	100	129	132	115	115	180	184	100	100	1
Buag_04_27	Buagrunn_2004	107	119	188	192	96	96	126	132	115	115	128	184	104	104	3
Buag_04_29	Buagrunn_2004	107	123	192	192	92	96	135	138	125	135	188	192	100	100	1
Buag_04_31	Buagrunn_2004	105	113	184	192	92	96	123	129	115	115	204	204	100	104	1
Buag_04_32	Buagrunn_2004	105	111	188	192	92	96	126	129	119	139	184	204	100	100	1
Buag_04_33	Buagrunn_2004	107	117	192	196	88	92	132	132	125	135	156	192	100	100	1
Buag_04_34	Buagrunn_2004	107	107	192	192	96	100	126	132	137	147	160	164	100	100	1
Buag_04_35	Buagrunn_2004	113	139	192	192	96	96	126	132	115	141	172	188	100	100	1
Buag_04_40	Buagrunn_2004	113	113	192	192	92	96	126	138	123	135	160	180	100	100	1
Buag_04_41	Buagrunn_2004	111	113	192	192	96	108	129	132	115	133	188	188	100	100	1
Buag_04_42	Buagrunn_2004	109	115	192	192	96	96	129	132	121	137	156	156	100	100	1
Buag_04_44	Buagrunn_2004	105	119	192	192	92	96	123	126	133	145	164	184	100	100	1
Buag_04_45	Buagrunn_2004	109	111	192	192	96	100	129	135	115	121	156	184	100	104	1
Buag_04_46	Buagrunn_2004	105	109	192	192	96	100	123	129	115	121	192	196	100	100	1
Buag_04_49	Buagrunn_2004	111	115	192	192	96	96	123	135	115	125	140	144	100	100	1
Buag_04_50	Buagrunn_2004	107	111	192	192	96	96	132	138	117	137	164	168	100	104	2
Buag_04_51	Buagrunn_2004	107	113	192	192	96	96	129	135	115	147	164	204	100	100	1
Buag_04_54	Buagrunn_2004	115	119	192	192	84	96	138	138	115	115	184	192	100	104	2
Buag_04_55	Buagrunn_2004	107	113	192	192	96	100	132	135	121	149	160	196	100	104	1
Batn_04_01	Batnesfjord_2004	111	115	188	192	96	112	129	135	115	115	192	192	100	100	1
Batn_04_02	Batnesfjord_2004	113	113	192	196	96	104	123	141	125	153	140	188	100	100	1
Batn_04_03	Batnesfjord_2004	107	113	188	192	92	96	123	126	143	215	184	200	100	100	1
Batn_04_04	Batnesfjord_2004	107	109	168	192	96	96	126	141	121	129	180	180	100	100	1
Batn_04_05	Batnesfjord_2004	113	141	192	192	96	104	129	132	115	139	168	180	100	100	1
Batn_04_06	Batnesfjord_2004	115	119	192	192	96	100	129	132	135	141	160	172	100	100	1
Batn_04_08	Batnesfjord_2004	111	111	192	192	96	112	126	126	121	125	164	176	100	104	1
Batn_04_10	Batnesfjord_2004	107	119	192	192	100	100	126	129	115	135	140	204	100	100	1
Batn_04_11	Batnesfjord_2004	107	113	192	196	96	100	129	135	125	145	188	192	100	100	1
Batn_04_12	Batnesfjord_2004	123	123	192	192	96	96	132	132	133	143	164	204	100	100	1
Batn_04_13	Batnesfjord_2004	113	113	192	192	96	100	129	141	115	143	156	204	100	100	2
Batn_04_15	Batnesfjord_2004	107	109	192	192	96	96	120	126	137	143	144	160	100	104	1
Batn_04_16	Batnesfjord_2004	117	119	192	192	96	96	129	135	139	141	176	192	100	100	1
Batn_04_17	Batnesfjord_2004	111	117	192	192	92	104	132	135	115	125	156	172	100	100	1
Batn_04_18	Batnesfjord_2004	105	105	192	192	96	100	126	126	115	115	180	200	100	100	1
Batn_04_19	Batnesfjord_2004	105	107	192	192	96	96	129	138	115	133	176	192	100	100	1
Batn_04_20	Batnesfjord_2004	113	117	192	192	96	96	132	150	115	159	148	196	100	100	1
Batn_04_21	Batnesfjord_2004	107	107	192	192	96	108	135	135	139	145	180	188	100	100	1
Batn_04_22	Batnesfjord_2004	107	117	192	192	96	96	129	132	115	125	156	160	100	100	1
Batn_04_23	Batnesfjord_2004	107	107	192	192	96	96	126	129	139	145	156	180	100	100	1
Batn_04_24	Batnesfjord_2004	109	133	192	192	96	96	126	132	137	153	160	172	100	100	1
Batn_04_25	Batnesfjord_2004	111	113	192	192	96	96	129	141	119	137	172	196	100	100	1
Batn_04_26	Batnesfjord_2004	107	121	192	192	92	96	123	132	137	139	168	188	100	100	1
Batn_04_27	Batnesfjord_2004	117	137	192	192	96	96	126	138	115	115	156	184	100	100	1
Batn_04_28	Batnesfjord_2004	107	113	192	192	92	96	132	141	115	137	156	176	100	100	1
Batn_04_29	Batnesfjord_2004	107	119	192	192	96	96	129	132	125	147	168	200	100	100	1
Batn_04_30	Batnesfjord_2004	111	119	192	192	96	100	126	126	137	139	160	176	100	100	1
Batn_04_31	Batnesfjord_2004	113	119	192	192	96	96	123	129	115	125	128	156	100	100	1
Batn_04_32	Batnesfjord_2004	113	119	160	192	92	96	126	129	137	137	140	188	100	100	1
Batn_04_33	Batnesfjord_2004	107	119	192	192	96	96	132	138	115	115	188	200	100	100	1
Batn_04_34	Batnesfjord_2004	107	129	192	192	96	112	129	132	137	137	156	168	100	100	1
Batn_04_35	Batnesfjord_2004	107	119	192	192	92	96	126	135	139	143	204	204	100	100	1
Batn_04_36	Batnesfjord_2004	111	137	192	192	96	96	129	129	141	165	176	184	100	104	1
Batn_04_37	Batnesfjord_2004	107	141	192	192	96	96	126	129	115	139	164	200	100	100	1
Batn_04_38	Batnesfjord_2004	109	109	192	192	96	96	126	138	115	133	156	184	100	100	1
Batn_04_39	Batnesfjord_2004	105	139	192	192	96	96	123	135	121	141	176	176	100	100	1
Batn_04_40	Batnesfjord_2004	107	141	192	192	88	104	132	135	115	139	148	172	100	100	1
Batn_04_41	Batnesfjord_2004	115	119	192	192	92	104	126	129	135	145	160	168	100	100	1
Batn_04_42	Batnesfjord_2004	107	117	192	192	96	96	126	132	133	133	156	172	100	100	1
Batn_04_43	Batnesfjord_2004	113	117	192	192	96	96	126	135	141	147	176	180	100	100	1
Batn_04_44	Batnesfjord_2004	107	113	192	196	92	92	129	132	139	147	176	188	100	100	1
Batn_04_45	Batnesfjord_2004	107	117	192	192	92	100	126	129	133	149	156	172	100	100	1
Batn_04_46	Batnesfjord_2004	105	121	192	192	96	96	132	132	141	145	160	196	100	100	1
Batn_04_47	Batnesfjord_2004	107	119	192	192	92	92	126	132	141	143	160	164	100	100	1
Batn_04_48	Batnesfjord_2004	111	113	192	192	96	96	126	132	137	143	176	200	100	100	1
Batn_04_49	Batnesfjord_2004	107	107	192	192	96	96	126	129	115	137	144	148	100	100	1
Batn_04_50	Batnesfjord_2004	109	113	192	192	96	96	126	132	137	143	124	156	100	100	2
Batn_04_51	Batnesfjord_2004	107	107	180	192	92	96	129	129	115	137	152	192	100	100	1
Batn_04_53	Batnesfjord_2004	113	129	184	192	96	96	126	126	115	141	164	184	100	100	1
Batn_04_54	Batnesfjord_2004	107	117	192	196	96	100	129	129	125	151	172	204	100	100	1
Batn_04_56	Batnesfjord_2004	107	113	192	192	96	96	126	135	133	137	156	160	100	100	1
Batn_04_57	Batnesfjord_2004	107	113	192	192	96	96	123	138	115	159	156	172	100	100	1
Batn_04_58	Batnesfjord_2004	113	113	192	192	96	96	123	129	137	149	180	204	100	100	1
Batn_04_59	Batnesfjord_2004	109	115	192	192	96	100	132	135	125	137	128	176	100	100	1
Batn_04_61	Batnesfjord_2004	111	141	192	192	96	96	123	135	125	145	200	204	100	100	1
Batn_04_62	Batnesfjord_2004	105	109	192	192	96	96	132	141	115	135	160	164	100	104	1
Vinj_04_01	Vinjefjord_2004	111	121	192	192	92	100	126	132	137	137	180	200	100	100	1
Vinj_04_02	Vinjefjord_2004	109	109	192	192	96	104	126	144	135	145	156	196	100	100	1
Vinj_04_03	Vinjefjord_2004	109	119	192	192	96	96	126	135	141	145	172	192	100	100	1
Vinj_04_04	Vinjefjord_2004	105	109	192	192	96	96	123	129	115	117	172	184	100	100	1
Vinj_04_05	Vinjefjord_2004	119	133	192	192	96	100	126	138	145	145	160	204	100	100	1
Vinj_04_06	Vinjefjord_2004	107	109	184	192	96	112	126	135	129	141	160	160	100	100	1
Vinj_04_07	Vinjefjord_2004	111	115	192	192	92	104	126	135	133	143	168	196	100	100	1
Vinj_04_09	Vinjefjord_2004	109	113	192	192	104	112	132	132	133	139	176	204	100	100	1
Vinj_04_12	Vinjefjord_2004	111	119	192	192	92	96	126	132	115	147	160	196	100	100	1
Vinj_04_13	Vinjefjord_2004	109	111	192	192	96	112	126	132	115	139	176	180	100	100	1
Vinj_04_14	Vinjefjord_2004	117	133	192	196	96	96	126	129	115	115	152	172	104	104	1
Vinj_04_15	Vinjefjord_2004	117	119	192	192	92	96	129	129	141	145	172	192	100	100	1
Vinj_04_16	Vinjefjord_2004	107	119	192	192	92	96	123	138	125	147	196	196	100	100	2
Vinj_04_17	Vinjefjord_2004	113	113	192	192	96	100	135	135	129	139	176	176	100	100	1
Vinj_04_18	Vinjefjord_2004	113	119	192	192	96	104	129	132	119	137	176	176	100	100	1
Vinj_04_19	Vinjefjord_2004	107	111	192	192	96	96	126	138	115	125	156	196	100	100	1
Vinj_04_20	Vinjefjord_2004	129	141	192	192	96	96	126	132	115	115	160	184	100	100	1
Vinj_04_21	Vinjefjord_2004	111	117	192	192	96	112	123	135	145	145	196	212	100	100	1
Vinj_04_22	Vinjefjord_2004	107	119	192	192	92	96	126	126	115	135	184	184	100	100	1
Vinj_04_23	Vinjefjord_2004	109	119	192	196	96	100	126	138	115	135	168	196	100	104	1
Vinj_04_24	Vinjefjord_2004	107	107	192	192	96	96	126	126	115	115	164	200	100	100	1
Vinj_04_25	Vinjefjord_2004	111	113	192	196	96	100	126	126	127	137	144	180	100	100	1
Vinj_04_26	Vinjefjord_2004	107	113	192	192	96	96	120	132	115	115	188	212	100	104	1
Vinj_04_27	Vinjefjord_2004	105	107	192	192	92	96	129	141	139	141	148	128	100	100	1
Vinj_04_30	Vinjefjord_2004	107	115	192	196	96	96	132	138	115	115	164	196	100	104	2
Vinj_04_31	Vinjefjord_2004	113	119	184	192	96	104	129	132	115	125	180	196	100	100	1
Vinj_04_32	Vinjefjord_2004	111	117	192	196	96	104	132	138	137	139	164	188	100	100	1
Vinj_04_33	Vinjefjord_2004	111	121	184	192	92	96	129	132	115	133	184	196	100	100	1
Vinj_04_34	Vinjefjord_2004	107	113	192	192	88	96	123	132	131	137	180	188	100	100	1
Vinj_04_36	Vinjefjord_2004	111	111	184	184	96	96	132	138	135	137	168	172	100	100	1
Vinj_04_37	Vinjefjord_2004	113	117	192	192	96	100	135	138	115	135	148	164	100	100	1
Vinj_04_38	Vinjefjord_2004	105	107	192	192	96	100	132	141	115	135	168	176	100	100	1
Vinj_04_39	Vinjefjord_2004	107	113	192	192	96	100	126	126	115	141	160	192	100	100	2
Vinj_04_41	Vinjefjord_2004	117	125	192	192	84	96	129	135	115	135	172	180	100	100	1
Vinj_04_42	Vinjefjord_2004	111	131	192	192	92	96	123	126	115	139	188	188	100	100	2
Vinj_04_43	Vinjefjord_2004	113	119	192	192	96	100	123	129	115	129	160	188	100	100	1
Vinj_04_44	Vinjefjord_2004	115	129	192	192	96	112	126	129	117	141	176	176	100	100	1
Vinj_04_47	Vinjefjord_2004	107	113	192	192	96	96	129	135	119	137	164	176	100	100	1
Vinj_04_48	Vinjefjord_2004	109	119	192	192	96	96	126	132	115	137	148	160	100	100	1
Vinj_04_49	Vinjefjord_2004	107	129	192	192	96	100	126	135	133	153	160	168	100	100	1
Vinj_04_50	Vinjefjord_2004	117	117	192	192	96	108	132	138	137	145	164	168	100	100	1
Vinj_04_51	Vinjefjord_2004	109	113	184	192	96	96	129	138	137	139	176	176	100	100	1
Vinj_04_52	Vinjefjord_2004	109	109	192	192	96	100	129	132	125	143	140	180	100	100	1
Vinj_04_53	Vinjefjord_2004	107	119	192	192	96	112	123	126	137	147	160	172	100	100	1
Vinj_04_54	Vinjefjord_2004	119	123	192	192	96	96	132	138	115	143	160	164	100	100	1
Vinj_04_55	Vinjefjord_2004	113	117	192	192	96	100	129	135	141	145	168	176	100	100	1
Vinj_04_56	Vinjefjord_2004	107	107	196	196	96	108	126	129	129	141	152	172	100	104	1
Vinj_04_57	Vinjefjord_2004	115	119	192	192	96	96	132	132	135	145	172	200	100	100	1
Vinj_04_58	Vinjefjord_2004	113	113	192	192	96	96	126	129	117	133	140	184	100	100	1
Vinj_04_59	Vinjefjord_2004	113	119	192	196	96	104	129	141	141	149	160	196	100	100	1
Vinj_04_60	Vinjefjord_2004	105	113	192	192	96	96	129	138	115	145	204	208	100	100	1
Vinj_04_61	Vinjefjord_2004	113	115	192	192	92	96	126	138	139	143	156	184	100	100	1
Vinj_04_62	Vinjefjord_2004	111	115	192	196	96	96	126	129	115	145	188	188	100	100	1
Vinj_04_63	Vinjefjord_2004	113	119	192	192	96	96	135	141	135	151	172	184	100	100	1
Vinj_04_64	Vinjefjord_2004	105	113	192	192	96	96	123	141	145	163	160	172	100	100	1
Vinj_04_65	Vinjefjord_2004	107	113	192	192	100	104	129	138	115	135	172	172	100	100	1
Vinj_04_67	Vinjefjord_2004	109	113	192	192	96	104	126	129	125	129	144	168	100	100	1
Vinj_04_68	Vinjefjord_2004	109	123	192	192	92	92	129	135	135	135	164	196	100	100	1
Vinj_04_70	Vinjefjord_2004	109	117	192	192	92	104	141	159	121	133	156	192	100	100	1
Vinj_04_71	Vinjefjord_2004	113	117	192	192	92	96	135	135	135	137	192	200	100	100	1
Vinj_04_72	Vinjefjord_2004	107	119	192	192	96	96	135	135	115	115	204	204	100	100	1
Vinj_04_74	Vinjefjord_2004	119	119	192	192	92	96	129	132	115	147	156	188	100	100	1
Vinj_04_75	Vinjefjord_2004	107	107	192	196	96	108	135	138	121	145	164	188	100	100	1
Vinj_04_76	Vinjefjord_2004	113	119	192	192	92	96	132	147	115	115	172	172	100	100	1
Vinj_04_77	Vinjefjord_2004	113	113	192	192	96	96	126	132	135	137	156	192	100	100	1
Vinj_04_78	Vinjefjord_2004	113	115	192	192	96	100	126	132	119	133	180	192	100	100	1
Vinj_04_79	Vinjefjord_2004	105	109	192	192	96	104	126	129	121	143	160	172	100	100	1
Vinj_04_80	Vinjefjord_2004	105	111	192	192	96	100	126	126	115	119	184	204	100	100	1
Vinj_04_81	Vinjefjord_2004	119	119	192	196	96	96	123	138	115	115	160	200	100	104	1
Vinj_04_82	Vinjefjord_2004	107	113	192	192	96	108	129	129	125	141	160	200	100	100	1
Vinj_04_83	Vinjefjord_2004	113	115	168	192	92	100	126	141	135	149	128	184	100	100	1
Vinj_04_84	Vinjefjord_2004	107	111	192	192	92	96	129	138	125	145	176	200	100	100	1
Vinj_04_85	Vinjefjord_2004	113	113	192	192	96	104	123	135	135	137	156	196	100	100	1
Vinj_04_87	Vinjefjord_2004	111	121	192	192	96	104	129	141	119	141	156	176	100	100	1
Vinj_04_88	Vinjefjord_2004	109	113	192	192	96	96	126	126	115	157	160	196	100	100	1
Vinj_04_89	Vinjefjord_2004	107	113	180	192	100	112	126	132	111	115	176	200	100	100	1
Vinj_04_90	Vinjefjord_2004	111	115	192	192	100	104	126	132	115	137	172	188	100	100	1
Vinj_04_91	Vinjefjord_2004	119	141	192	192	96	96	126	135	115	141	172	172	100	100	1
Vinj_04_92	Vinjefjord_2004	109	109	192	192	92	96	129	129	121	125	164	176	100	100	2
Vinj_04_93	Vinjefjord_2004	109	119	192	196	96	96	126	129	139	143	164	176	100	100	1
Vinj_04_94	Vinjefjord_2004	115	123	192	192	96	100	123	138	115	135	184	192	100	100	1
Vinj_04_95	Vinjefjord_2004	109	119	192	192	92	96	123	126	121	141	160	184	100	100	1
Vinj_04_96	Vinjefjord_2004	107	119	192	196	92	96	135	135	121	137	188	204	100	100	1
Vinj_04_97	Vinjefjord_2004	113	113	192	192	96	96	126	126	115	147	148	168	100	100	1
Vinj_04_98	Vinjefjord_2004	107	113	192	192	96	96	135	147	115	115	172	200	100	100	1
Vinj_04_99	Vinjefjord_2004	107	111	192	192	92	96	123	123	115	139	172	184	100	100	1
Vinj_04_100	Vinjefjord_2004	107	107	192	192	96	96	132	141	115	115	172	188	100	100	1
Vinj_04_101	Vinjefjord_2004	107	111	192	192	96	100	126	132	141	143	172	180	100	100	1
Vinj_04_102	Vinjefjord_2004	109	113	192	192	92	104	126	132	115	187	172	180	100	100	1
Vinj_04_103	Vinjefjord_2004	119	119	188	192	96	96	129	129	137	139	140	184	100	100	1
Vinj_04_104	Vinjefjord_2004	105	113	192	192	96	112	123	138	115	145	180	192	100	100	1
Vinj_04_105	Vinjefjord_2004	105	105	192	192	92	96	126	126	137	147	180	180	100	100	1
Vinj_04_106	Vinjefjord_2004	105	107	192	192	96	96	123	129	143	143	160	160	100	100	1
Vinj_04_107	Vinjefjord_2004	109	139	184	192	96	96	123	129	115	139	164	184	100	100	1
Vinj_04_108	Vinjefjord_2004	111	115	190	192	92	96	126	126	115	139	172	204	100	100	1
Vinj_04_109	Vinjefjord_2004	107	111	192	192	96	96	126	126	115	139	176	184	100	100	1
Vinj_04_110	Vinjefjord_2004	107	109	192	196	96	96	126	138	139	143	156	184	100	100	1
Vinj_04_111	Vinjefjord_2004	107	111	192	192	92	96	123	135	115	153	164	184	100	104	1
Vinj_04_112	Vinjefjord_2004	107	111	192	192	96	96	126	141	137	139	172	208	100	100	1
Hitr_04_01	Hitra_Laksovik_2004	105	123	192	192	92	104	129	129	139	153	148	168	100	100	1
Hitr_04_02	Hitra_Laksovik_2004	107	113	192	192	84	92	126	132	137	155	184	184	100	100	1
Hitr_04_03	Hitra_Laksovik_2004	113	141	192	192	92	96	126	135	117	127	172	192	100	100	1
Hitr_04_04	Hitra_Laksovik_2004	113	115	192	192	96	96	129	135	137	139	172	188	100	100	1
Hitr_04_05	Hitra_Laksovik_2004	109	117	192	192	104	104	126	141	137	137	168	176	100	100	1
Hitr_04_06	Hitra_Laksovik_2004	105	117	192	192	96	96	123	129	115	189	160	176	100	100	1
Hitr_04_07	Hitra_Laksovik_2004	107	109	192	196	96	96	129	138	123	143	164	176	100	100	1
Hitr_04_08	Hitra_Laksovik_2004	107	141	192	192	96	100	135	141	115	139	176	176	100	100	1
Hitr_04_09	Hitra_Laksovik_2004	107	107	192	192	96	100	123	126	115	115	176	176	100	100	1
Hitr_04_10	Hitra_Laksovik_2004	107	107	192	192	88	96	135	141	137	139	188	212	100	100	1
Hitr_04_11	Hitra_Laksovik_2004	107	109	192	196	96	96	123	129	143	145	192	200	100	100	1
Hitr_04_12	Hitra_Laksovik_2004	113	117	192	192	96	96	126	126	157	163	176	176	100	100	1
Hitr_04_13	Hitra_Laksovik_2004	113	117	192	192	96	96	129	132	119	125	188	192	100	100	1
Hitr_04_14	Hitra_Laksovik_2004	117	117	192	192	96	96	135	141	139	141	164	204	100	100	1
Hitr_04_15	Hitra_Laksovik_2004	107	109	192	192	96	100	126	126	115	153	152	196	100	100	1
Hitr_04_16	Hitra_Laksovik_2004	107	117	192	192	96	96	123	126	123	135	192	196	100	100	1
Hitr_04_17	Hitra_Laksovik_2004	107	107	192	192	96	96	135	135	117	155	172	176	100	100	1
Hitr_04_18	Hitra_Laksovik_2004	105	117	192	192	96	104	132	135	125	137	128	168	100	100	1
Hitr_04_19	Hitra_Laksovik_2004	119	123	192	192	96	96	126	129	115	115	152	172	100	100	1
Hitr_04_20	Hitra_Laksovik_2004	119	133	192	192	96	96	126	129	125	203	156	192	100	100	1
Hitr_04_21	Hitra_Laksovik_2004	111	119	184	192	92	96	126	138	115	153	164	180	100	100	1
Hitr_04_23	Hitra_Laksovik_2004	111	119	192	196	96	96	126	132	149	153	132	168	100	100	1
Hitr_04_24	Hitra_Laksovik_2004	109	115	192	192	92	96	126	138	115	133	168	204	100	100	1
Hitr_04_25	Hitra_Laksovik_2004	113	125	192	192	96	96	126	141	115	123	176	188	100	100	1
Hitr_04_26	Hitra_Laksovik_2004	107	113	192	192	104	108	132	135	115	163	168	196	100	100	1
Hitr_04_27	Hitra_Laksovik_2004	113	113	192	192	92	104	129	132	121	139	160	180	100	100	1
Hitr_04_28	Hitra_Laksovik_2004	105	105	192	192	96	96	126	138	115	139	160	188	100	104	1
Hitr_04_29	Hitra_Laksovik_2004	117	141	192	192	92	96	126	132	115	147	172	188	100	100	1
Hitr_04_30	Hitra_Laksovik_2004	105	111	192	192	96	96	129	132	121	137	192	216	100	100	1
Hitr_04_31	Hitra_Laksovik_2004	113	119	192	192	92	100	129	135	137	163	160	180	100	100	1
Hitr_04_32	Hitra_Laksovik_2004	107	109	192	196	92	92	126	126	115	145	148	164	100	100	1
Hitr_04_33	Hitra_Laksovik_2004	107	107	192	196	92	96	126	129	125	137	188	188	100	100	1
Hitr_04_34	Hitra_Laksovik_2004	115	141	192	192	100	112	129	129	115	115	152	196	100	100	1
Hitr_04_35	Hitra_Laksovik_2004	105	119	192	196	104	108	126	141	129	145	172	184	100	104	1
Hitr_04_36	Hitra_Laksovik_2004	105	105	192	192	92	96	123	126	115	137	176	196	100	100	1
Hitr_04_37	Hitra_Laksovik_2004	113	115	192	192	92	96	126	141	115	115	156	168	100	104	2
Hitr_04_38	Hitra_Laksovik_2004	107	113	192	192	92	96	126	141	123	141	164	168	100	100	1
Hitr_04_39	Hitra_Laksovik_2004	105	119	192	192	96	96	132	135	117	137	160	180	100	100	1
Hitr_04_40	Hitra_Laksovik_2004	113	113	192	192	92	100	123	126	139	145	156	180	100	100	1
Hitr_04_41	Hitra_Laksovik_2004	109	109	192	192	96	96	129	129	125	157	164	184	100	100	1
Hitr_04_42	Hitra_Laksovik_2004	105	113	192	192	84	108	129	132	115	153	196	196	100	100	1
Hitr_04_43	Hitra_Laksovik_2004	109	113	192	192	96	96	126	135	121	135	176	176	100	100	1
Hitr_04_44	Hitra_Laksovik_2004	107	119	192	192	92	96	126	129	115	137	172	192	100	100	1
Hitr_04_46	Hitra_Laksovik_2004	105	109	192	192	100	100	126	129	115	139	160	180	100	100	1
Hitr_04_47	Hitra_Laksovik_2004	107	133	192	192	96	96	123	150	115	137	176	176	100	100	1
Hitr_04_48	Hitra_Laksovik_2004	113	139	192	192	96	104	126	126	115	115	160	164	100	100	1
Hitr_04_49	Hitra_Laksovik_2004	107	119	192	192	96	96	129	138	141	141	156	160	100	100	1
Hitr_04_50	Hitra_Laksovik_2004	111	117	192	192	96	100	126	129	149	155	180	180	100	100	1
Hitr_04_51	Hitra_Laksovik_2004	111	119	192	196	96	100	126	129	135	139	172	188	100	100	1
Hitr_04_52	Hitra_Laksovik_2004	109	119	192	192	96	100	126	135	115	115	160	172	100	100	1
Hitr_04_53	Hitra_Laksovik_2004	107	107	192	196	96	112	129	135	115	125	152	160	100	100	1
Hitr_04_54	Hitra_Laksovik_2004	113	115	192	192	100	108	129	132	115	139	160	176	100	100	1
Hitr_04_55	Hitra_Laksovik_2004	107	109	192	192	92	96	126	126	115	151	204	204	100	100	1
Hitr_04_56	Hitra_Laksovik_2004	107	109	192	192	92	96	129	135	135	137	164	188	100	104	1
Hitr_04_57	Hitra_Laksovik_2004	113	119	192	192	92	104	132	141	119	135	172	172	100	100	1
Hitr_04_58	Hitra_Laksovik_2004	107	113	192	196	96	96	123	123	115	141	180	184	100	104	1
Hitr_04_59	Hitra_Laksovik_2004	107	125	192	192	96	112	132	141	119	137	176	176	100	100	1
Hitr_04_60	Hitra_Laksovik_2004	107	121	192	192	92	96	129	141	115	133	144	172	100	104	1
Hitr_04_61	Hitra_Laksovik_2004	105	107	192	192	92	104	132	138	137	137	172	172	100	100	1
Hitr_04_62	Hitra_Laksovik_2004	111	113	192	192	96	96	126	126	137	139	176	180	100	100	1
Hitr_04_63	Hitra_Laksovik_2004	117	117	192	192	96	100	126	129	117	145	172	192	100	100	1
Hitr_04_64	Hitra_Laksovik_2004	113	119	192	192	92	96	129	138	137	143	172	172	100	100	1
Hitr_04_65	Hitra_Laksovik_2004	119	141	192	192	96	104	129	135	137	137	172	196	100	100	1
Hitr_04_66	Hitra_Laksovik_2004	105	105	192	192	96	96	126	129	115	137	180	204	100	100	1
Hitr_04_67	Hitra_Laksovik_2004	139	141	192	192	92	96	123	132	119	137	180	180	100	100	1
Hitr_04_68	Hitra_Laksovik_2004	113	115	184	196	100	104	126	129	135	141	152	196	100	100	1
Hitr_04_69	Hitra_Laksovik_2004	109	111	192	192	96	96	126	135	135	147	196	196	100	100	1
Hitr_04_70	Hitra_Laksovik_2004	111	123	192	196	96	104	126	129	133	137	156	176	100	100	1
Hitr_04_71	Hitra_Laksovik_2004	107	141	192	192	96	112	123	126	115	141	176	184	100	100	1
Hitr_04_72	Hitra_Laksovik_2004	113	123	192	192	92	96	126	138	139	157	196	208	100	100	1
Hitr_04_73	Hitra_Laksovik_2004	121	121	192	192	92	96	126	141	139	165	148	148	100	100	1
Hitr_04_75	Hitra_Laksovik_2004	105	109	192	192	96	96	138	141	135	135	148	192	100	100	1
Hitr_04_76	Hitra_Laksovik_2004	107	113	188	196	92	96	129	132	137	141	188	200	100	100	1
Hitr_04_78	Hitra_Laksovik_2004	107	121	192	192	96	96	126	126	133	141	148	164	100	100	1
Hitr_04_79	Hitra_Laksovik_2004	107	113	192	192	92	96	126	132	115	137	164	172	100	100	1
Hitr_04_80	Hitra_Laksovik_2004	113	119	192	192	96	100	129	138	115	131	160	164	100	104	1
Hitr_04_81	Hitra_Laksovik_2004	105	113	192	192	96	112	129	141	115	153	160	180	100	100	1
Hitr_04_82	Hitra_Laksovik_2004	107	109	192	192	92	92	126	132	135	137	128	204	100	100	1
Hitr_04_83	Hitra_Laksovik_2004	109	121	192	192	96	100	126	135	115	135	180	188	100	100	1
Hitr_04_84	Hitra_Laksovik_2004	105	109	192	196	96	100	123	129	137	139	172	192	100	100	1
Hitr_04_85	Hitra_Laksovik_2004	107	131	192	192	96	100	135	135	115	115	160	188	100	100	1
Hitr_04_86	Hitra_Laksovik_2004	113	119	192	192	92	96	129	138	125	137	156	188	100	100	1
Hitr_04_87	Hitra_Laksovik_2004	113	119	192	192	96	100	123	129	115	125	172	176	100	100	1
Hitr_04_88	Hitra_Laksovik_2004	107	113	192	192	88	96	126	129	125	137	148	188	100	100	1
Hitr_04_89	Hitra_Laksovik_2004	113	121	188	192	96	100	117	123	115	137	156	192	100	100	1
Frøy_04_01	Frøya_2004	105	113	192	192	96	100	123	138	115	133	144	176	100	100	2
Frøy_04_03	Frøya_2004	107	109	192	192	96	104	132	135	139	145	164	208	100	100	1
Frøy_04_04	Frøya_2004	109	109	168	192	96	100	126	132	139	143	164	188	100	100	1
Frøy_04_06	Frøya_2004	115	141	192	192	92	100	129	141	115	137	164	184	100	100	1
Frøy_04_07	Frøya_2004	105	113	192	192	96	104	126	129	115	143	192	204	100	100	1
Frøy_04_08	Frøya_2004	111	139	192	192	96	96	126	135	135	137	172	176	100	100	1
Frøy_04_09	Frøya_2004	113	115	192	192	96	100	129	132	143	151	152	164	100	100	1
Frøy_04_10	Frøya_2004	105	109	192	192	92	100	123	138	115	143	168	196	100	100	1
Frøy_04_11	Frøya_2004	115	141	192	192	96	100	126	141	139	155	180	192	100	100	1
Frøy_04_12	Frøya_2004	113	119	192	196	96	100	135	135	135	137	180	196	100	100	1
Frøy_04_13	Frøya_2004	107	131	192	192	104	108	123	132	139	143	168	192	100	100	1
Frøy_04_14	Frøya_2004	113	119	192	196	96	108	123	126	125	131	160	184	100	100	1
Frøy_04_15	Frøya_2004	107	109	192	192	92	96	129	135	145	147	164	184	100	100	1
Frøy_04_16	Frøya_2004	107	111	192	192	92	108	129	132	115	141	160	180	100	100	1
Frøy_04_17	Frøya_2004	107	119	192	192	96	96	126	141	159	179	168	196	100	100	1
Frøy_04_18	Frøya_2004	105	111	192	192	92	96	126	129	143	149	180	216	100	100	1
Frøy_04_19	Frøya_2004	109	113	192	192	96	96	123	126	129	135	160	180	100	100	1
Frøy_04_20	Frøya_2004	107	115	192	192	96	104	126	132	115	137	180	216	100	100	1
Frøy_04_21	Frøya_2004	107	115	192	192	96	100	126	135	115	137	156	192	100	100	1
Frøy_04_22	Frøya_2004	105	117	192	192	92	96	129	132	115	149	180	208	100	100	1
Frøy_04_23	Frøya_2004	119	143	192	192	96	104	123	138	125	137	172	172	100	100	1
Frøy_04_24	Frøya_2004	107	107	192	192	96	104	132	138	121	135	148	180	100	100	1
Frøy_04_25	Frøya_2004	107	133	192	192	96	112	120	129	125	135	128	172	100	100	1
Frøy_04_27	Frøya_2004	107	109	192	192	96	96	123	132	133	137	172	204	100	100	1
Frøy_04_29	Frøya_2004	111	111	192	192	96	96	129	141	115	139	196	196	100	104	1
Frøy_04_30	Frøya_2004	117	117	192	196	96	100	132	138	135	137	176	180	100	100	1
Frøy_04_31	Frøya_2004	113	145	192	196	96	100	126	138	135	145	172	196	100	100	1
Frøy_04_32	Frøya_2004	111	119	184	192	92	104	129	132	145	145	200	208	100	100	1
Frøy_04_33	Frøya_2004	113	113	192	192	96	112	126	126	115	151	148	164	100	104	1
Frøy_04_36	Frøya_2004	107	143	192	192	96	96	126	129	133	141	160	180	100	100	1
Frøy_04_37	Frøya_2004	107	107	192	192	96	96	126	126	135	141	148	168	100	100	1
Frøy_04_38	Frøya_2004	107	107	192	192	92	96	135	138	125	143	172	184	100	100	1
Frøy_04_40	Frøya_2004	117	117	192	192	96	96	126	132	137	155	140	172	100	100	1
Frøy_04_41	Frøya_2004	107	117	192	192	92	96	135	135	133	139	160	168	100	100	1
Frøy_04_42	Frøya_2004	113	117	192	192	96	100	129	141	137	153	132	160	100	100	1
Frøy_04_43	Frøya_2004	105	119	192	192	96	96	126	126	115	159	168	188	100	100	1
Frøy_04_44	Frøya_2004	105	105	192	192	92	100	123	126	115	137	172	208	100	100	1
Frøy_04_45	Frøya_2004	113	119	192	192	92	100	123	132	145	147	172	176	100	104	1
Frøy_04_46	Frøya_2004	107	113	168	192	92	100	129	141	117	139	156	176	100	104	1
Frøy_04_47	Frøya_2004	113	141	192	192	96	96	129	132	115	133	128	188	100	100	1
Frøy_04_48	Frøya_2004	107	111	188	196	92	96	135	135	127	137	160	172	100	100	1
Frøy_04_49	Frøya_2004	107	107	192	192	92	100	123	132	115	153	172	180	100	100	1
Frøy_04_50	Frøya_2004	113	129	192	192	92	100	123	129	143	159	160	160	100	100	1
Frøy_04_51	Frøya_2004	107	107	192	192	96	112	123	129	125	143	164	164	100	100	1
Frøy_04_52	Frøya_2004	113	115	192	192	96	112	132	132	121	137	192	196	100	100	1
Frøy_04_53	Frøya_2004	109	111	192	192	96	96	129	138	115	135	172	184	100	100	1
Frøy_04_54	Frøya_2004	107	115	192	192	96	96	129	132	115	145	160	176	100	100	1
Frøy_04_55	Frøya_2004	113	113	192	192	92	92	135	138	115	137	176	200	100	100	2
Frøy_04_56	Frøya_2004	107	111	192	192	96	96	126	138	115	155	172	180	100	100	1
Frøy_04_57	Frøya_2004	107	119	192	192	96	96	138	141	115	153	156	168	100	100	1
Frøy_04_58	Frøya_2004	107	111	192	192	92	96	129	132	131	145	204	204	100	100	1
Frøy_04_59	Frøya_2004	107	141	188	192	96	104	126	129	115	135	164	184	100	100	1
Frøy_04_60	Frøya_2004	107	107	192	192	100	104	129	132	115	125	164	184	100	100	1
Frøy_04_62	Frøya_2004	109	113	192	192	96	96	129	132	143	149	188	200	100	100	1
Frøy_04_63	Frøya_2004	119	119	192	192	92	96	138	141	125	133	164	164	100	100	1
Frøy_04_64	Frøya_2004	107	111	192	192	100	112	132	135	137	139	160	180	100	100	1
Frøy_04_65	Frøya_2004	109	115	188	192	96	104	129	135	115	115	160	168	100	100	1
Frøy_04_66	Frøya_2004	105	119	192	192	96	100	129	135	115	115	156	172	100	100	1
Frøy_04_67	Frøya_2004	105	117	192	192	96	96	123	132	135	143	152	200	100	100	1
Frøy_04_68	Frøya_2004	111	119	192	192	96	96	129	129	115	115	156	208	100	100	1
Frøy_04_69	Frøya_2004	113	115	192	196	96	96	126	141	115	115	176	184	100	100	1
Frøy_04_70	Frøya_2004	119	141	192	192	96	100	126	129	115	145	152	176	100	100	1
Frøy_04_71	Frøya_2004	107	113	196	196	92	96	129	138	115	115	192	192	100	100	1
Lange_04_09	Langesundet_2004	113	121	192	192	88	96	126	129	115	137	200	204	100	100	2
Lange_04_10	Langesundet_2004	111	117	192	192	96	100	126	129	135	153	156	164	100	100	1
Lange_04_11	Langesundet_2004	113	115	192	192	96	96	126	129	115	139	168	180	100	100	1
Lange_04_12	Langesundet_2004	107	119	192	192	96	96	126	135	133	141	144	144	100	100	1
Lange_04_13	Langesundet_2004	107	113	192	192	96	112	129	129	137	141	172	180	100	100	1
Lange_04_15	Langesundet_2004	107	113	192	192	100	100	120	138	125	143	168	208	100	100	1
Lange_04_16	Langesundet_2004	113	113	192	192	96	96	129	132	115	157	184	200	100	100	1
Lange_04_17	Langesundet_2004	113	115	192	196	96	100	126	135	121	139	172	192	100	100	1
Lange_04_19	Langesundet_2004	111	117	192	192	92	96	132	132	137	137	168	184	100	100	1
Lange_04_21	Langesundet_2004	109	113	192	192	96	96	129	132	131	137	152	160	100	104	1
Lange_04_22	Langesundet_2004	107	125	192	192	96	96	129	135	115	139	176	176	100	100	1
Lange_04_23	Langesundet_2004	111	123	192	192	96	96	132	132	135	137	172	184	100	100	1
Lange_04_24	Langesundet_2004	107	117	192	192	92	92	135	138	115	135	164	164	100	100	1
Lange_04_29	Langesundet_2004	125	141	188	192	96	96	123	138	141	143	164	200	100	100	1
Lange_04_30	Langesundet_2004	105	107	192	192	96	96	126	138	119	137	188	192	100	100	1
Lange_04_33	Langesundet_2004	107	107	188	192	96	108	126	126	137	141	164	176	100	100	1
Lange_04_35	Langesundet_2004	107	107	192	192	96	96	117	126	137	137	168	184	100	104	1
Lange_04_37	Langesundet_2004	107	119	192	192	96	112	129	135	115	115	204	204	100	100	1
Lange_04_38	Langesundet_2004	107	119	192	192	96	100	126	135	135	137	172	196	100	100	1
Lange_04_39	Langesundet_2004	111	113	192	192	96	100	126	141	135	149	152	168	100	100	1
Lange_04_40	Langesundet_2004	109	117	192	192	96	96	123	135	117	117	164	164	100	100	1
Lange_04_41	Langesundet_2004	113	113	192	192	96	96	129	132	115	115	164	164	100	104	1
Lange_04_42	Langesundet_2004	109	127	192	192	96	96	129	132	121	137	164	180	100	100	1
Lange_04_43	Langesundet_2004	111	113	192	192	96	108	126	132	135	135	196	204	100	100	1
Lange_04_44	Langesundet_2004	107	119	192	192	100	112	126	141	115	115	188	200	100	100	1
Lange_04_45	Langesundet_2004	105	107	192	192	92	96	129	129	115	135	148	152	100	100	1
Lange_04_46	Langesundet_2004	109	119	168	192	96	96	132	132	115	165	160	160	100	104	1
Lange_04_47	Langesundet_2004	109	123	192	192	92	96	126	129	115	145	144	144	100	100	1
Lange_04_48	Langesundet_2004	107	117	192	192	96	100	123	129	117	145	156	192	100	100	1
Lange_04_49	Langesundet_2004	107	107	176	192	96	100	135	138	129	133	172	180	100	100	1
Lange_04_54	Langesundet_2004	107	107	192	192	96	96	126	132	115	115	156	172	100	100	1
Lange_04_55	Langesundet_2004	111	119	192	192	96	96	126	132	115	145	188	204	100	104	1
Lange_04_56	Langesundet_2004	119	119	192	192	96	104	132	138	121	131	144	156	100	100	1
Lange_04_57	Langesundet_2004	107	117	192	196	96	96	126	126	115	125	196	204	100	104	1
Lange_04_58	Langesundet_2004	113	117	192	192	96	104	126	132	115	147	180	204	100	100	1
Lange_04_59	Langesundet_2004	119	121	192	192	96	96	126	135	115	135	156	196	100	100	1
Lange_04_60	Langesundet_2004	109	109	192	192	96	100	129	138	119	139	180	208	100	100	1
Lange_04_61	Langesundet_2004	111	119	192	192	96	104	126	126	115	115	148	180	100	100	1
Lange_04_62	Langesundet_2004	111	123	192	192	96	96	132	135	115	153	164	180	100	100	1
Lange_04_63	Langesundet_2004	107	107	192	192	88	96	126	126	115	115	172	172	100	100	1
Lange_04_66	Langesundet_2004	109	121	192	192	96	96	126	126	115	163	184	184	100	104	1
Lange_04_67	Langesundet_2004	107	107	192	192	92	96	129	129	115	137	148	168	100	100	1
Lange_04_68	Langesundet_2004	113	113	192	192	96	100	126	135	115	135	168	172	100	100	1
Lange_04_69	Langesundet_2004	113	133	192	196	100	100	126	138	115	147	156	180	100	100	1
Lange_04_71	Langesundet_2004	107	113	192	192	96	96	126	138	115	141	180	180	100	104	1
Lange_04_72	Langesundet_2004	107	109	192	192	96	100	129	132	133	143	152	172	100	104	1
Lange_04_73	Langesundet_2004	113	117	192	192	104	104	126	138	115	123	172	184	100	100	1
Lange_04_74	Langesundet_2004	119	141	192	192	96	108	138	138	145	147	156	204	100	100	1
Lange_04_75	Langesundet_2004	113	113	192	192	96	100	126	132	115	125	156	180	100	100	1
Lange_04_76	Langesundet_2004	107	113	196	196	96	104	132	132	115	137	148	180	100	100	1
Lange_04_77	Langesundet_2004	107	109	192	192	84	96	123	135	115	125	168	176	100	100	1
Lange_04_79	Langesundet_2004	107	115	192	192	88	96	126	132	115	157	192	204	100	100	1
Lange_04_81	Langesundet_2004	107	107	192	196	92	96	129	135	115	137	144	164	100	100	1
Lange_04_83	Langesundet_2004	105	109	192	208	92	112	126	135	139	149	164	184	100	100	1
Lange_04_85	Langesundet_2004	105	113	192	192	92	104	123	132	121	143	172	204	100	100	1
Lange_04_88	Langesundet_2004	109	111	192	192	96	96	132	138	137	145	152	180	100	100	1
Lange_04_89	Langesundet_2004	107	139	192	192	96	96	129	132	139	141	160	188	100	100	1
Lange_04_90	Langesundet_2004	113	117	192	192	96	96	129	141	115	137	192	196	100	100	1
Lange_04_91	Langesundet_2004	111	113	192	192	92	96	126	135	115	139	184	196	100	100	1
Lange_04_92	Langesundet_2004	111	115	192	192	96	96	117	129	141	141	172	196	100	100	1
Lange_04_93	Langesundet_2004	107	109	192	192	92	96	123	132	115	139	160	176	100	100	1
Lange_04_94	Langesundet_2004	111	119	192	192	92	96	132	141	115	145	164	180	100	100	1
Lange_04_95	Langesundet_2004	113	117	184	192	104	112	123	129	115	121	164	188	100	100	1
Lange_04_96	Langesundet_2004	115	119	188	192	96	96	126	129	139	145	164	172	100	100	1
LSjon_04_01	LilleSjona_2004	107	137	192	192	96	100	132	132	115	137	164	168	100	100	1
LSjon_04_02	LilleSjona_2004	113	119	192	192	96	96	132	138	135	137	168	184	100	104	1
LSjon_04_03	LilleSjona_2004	107	113	192	192	96	96	132	135	115	115	176	188	100	104	1
LSjon_04_04	LilleSjona_2004	111	117	192	192	88	96	123	129	115	115	172	176	100	100	1
LSjon_04_05	LilleSjona_2004	107	117	192	192	88	96	129	135	137	143	136	140	100	100	1
LSjon_04_06	LilleSjona_2004	107	119	192	192	96	96	132	135	115	165	168	172	100	104	1
LSjon_04_07	LilleSjona_2004	109	117	192	192	96	96	135	138	115	121	180	180	104	104	1
LSjon_04_08	LilleSjona_2004	107	117	192	196	92	96	135	138	115	115	184	192	100	100	1
LSjon_04_09	LilleSjona_2004	119	121	192	196	92	96	129	135	115	115	184	196	100	104	1
LSjon_04_10	LilleSjona_2004	115	115	192	192	96	104	129	132	141	147	144	184	100	100	1
LSjon_04_11	LilleSjona_2004	107	107	192	192	96	96	135	135	115	143	172	176	100	104	2
LSjon_04_12	LilleSjona_2004	113	119	192	192	96	100	129	129	115	115	180	200	100	100	1
LSjon_04_13	LilleSjona_2004	105	111	192	192	96	104	123	129	115	159	156	168	100	104	1
LSjon_04_14	LilleSjona_2004	115	119	192	192	96	96	123	126	117	135	152	152	100	100	1
LSjon_04_15	LilleSjona_2004	105	107	192	192	84	96	129	135	115	157	156	204	100	100	1
LSjon_04_16	LilleSjona_2004	107	119	192	192	92	96	129	135	115	121	152	160	100	104	1
LSjon_04_17	LilleSjona_2004	113	115	188	192	92	96	126	126	119	143	188	200	100	104	1
LSjon_04_18	LilleSjona_2004	113	113	192	192	96	96	126	126	125	137	140	140	100	100	1
LSjon_04_19	LilleSjona_2004	105	111	192	192	100	104	126	129	137	155	156	188	100	100	1
LSjon_04_20	LilleSjona_2004	107	113	192	192	96	104	135	141	115	115	160	184	100	100	1
LSjon_04_21	LilleSjona_2004	107	109	192	192	92	100	126	126	115	137	136	152	100	100	1
LSjon_04_22	LilleSjona_2004	109	113	192	192	92	96	123	132	115	115	164	188	100	100	2
LSjon_04_23	LilleSjona_2004	105	109	192	192	96	96	126	138	121	141	164	172	100	104	1
LSjon_04_24	LilleSjona_2004	107	113	192	192	96	96	126	129	115	115	164	200	100	104	1
LSjon_04_25	LilleSjona_2004	117	117	192	196	96	96	132	138	115	143	164	188	100	100	1
LSjon_04_26	LilleSjona_2004	115	119	192	192	92	96	126	132	121	125	172	176	100	100	1
LSjon_04_27	LilleSjona_2004	107	115	192	192	96	96	129	141	137	139	140	204	100	100	1
LSjon_04_28	LilleSjona_2004	107	119	192	192	96	96	126	138	137	137	196	212	100	100	1
LSjon_04_29	LilleSjona_2004	107	113	192	192	100	104	126	126	139	143	160	196	100	100	1
LSjon_04_30	LilleSjona_2004	107	113	192	192	96	96	126	135	143	147	176	192	100	100	1
LSjon_04_31	LilleSjona_2004	113	113	192	192	96	100	126	132	115	141	172	208	100	104	1
LSjon_04_32	LilleSjona_2004	107	119	192	192	92	96	126	126	115	149	160	180	100	100	1
LSjon_04_33	LilleSjona_2004	109	119	188	192	96	96	129	138	125	139	164	168	100	100	1
LSjon_04_34	LilleSjona_2004	105	119	192	192	96	112	123	126	149	163	156	180	100	100	1
LSjon_04_35	LilleSjona_2004	111	115	192	192	96	108	126	126	115	121	156	172	100	104	1
LSjon_04_36	LilleSjona_2004	111	121	192	192	96	96	123	141	115	125	164	200	100	100	1
LSjon_04_37	LilleSjona_2004	111	115	188	192	92	100	123	135	115	131	168	176	100	100	1
LSjon_04_38	LilleSjona_2004	107	113	192	192	92	96	126	138	115	137	160	164	100	104	1
LSjon_04_39	LilleSjona_2004	107	119	192	192	96	96	123	138	115	143	156	184	100	104	1
LSjon_04_40	LilleSjona_2004	107	115	192	192	96	96	123	126	115	125	160	192	100	104	1
LSjon_04_41	LilleSjona_2004	119	141	192	192	96	100	126	135	115	135	160	164	100	100	1
LSjon_04_42	LilleSjona_2004	107	113	192	192	96	112	129	141	115	137	172	172	100	100	1
LSjon_04_43	LilleSjona_2004	109	109	192	192	96	96	135	138	115	133	176	176	100	104	1
LSjon_04_44	LilleSjona_2004	113	119	192	192	96	96	123	135	115	135	128	168	100	104	1
LSjon_04_45	LilleSjona_2004	113	119	192	192	96	96	129	135	115	115	176	196	104	104	1
LSjon_04_46	LilleSjona_2004	117	117	192	192	92	104	129	138	115	131	168	172	100	100	1
LSjon_04_47	LilleSjona_2004	117	119	192	192	96	96	132	135	115	115	168	188	100	100	1
LSjon_04_48	LilleSjona_2004	107	113	192	192	92	100	129	132	115	137	144	168	100	100	1
LSjon_04_49	LilleSjona_2004	107	109	192	192	96	112	123	126	115	115	192	216	100	100	1
LSjon_04_50	LilleSjona_2004	107	109	192	192	100	100	123	129	115	155	168	216	100	100	1
LSjon_04_51	LilleSjona_2004	107	113	192	192	96	104	129	135	115	137	192	196	100	104	1
LSjon_04_52	LilleSjona_2004	105	113	192	192	96	100	129	135	115	143	180	184	100	104	1
LSjon_04_53	LilleSjona_2004	109	113	192	192	88	92	129	132	115	143	128	200	104	104	1
LSjon_04_54	LilleSjona_2004	107	107	192	192	96	96	123	129	115	117	172	204	100	100	1
LSjon_04_55	LilleSjona_2004	117	119	192	192	96	96	132	135	115	125	168	184	100	100	1
LSjon_04_56	LilleSjona_2004	115	115	192	192	92	92	129	129	115	133	184	204	100	100	1
LSjon_04_57	LilleSjona_2004	113	115	192	192	96	96	129	135	115	125	156	156	100	100	1
LSjon_04_58	LilleSjona_2004	113	137	192	192	96	96	126	132	115	115	164	172	104	104	1
LSjon_04_59	LilleSjona_2004	105	109	192	192	92	96	123	132	139	143	172	172	100	100	1
LSjon_04_60	LilleSjona_2004	107	119	192	196	92	104	126	132	115	139	172	204	100	100	1
LSjon_04_61	LilleSjona_2004	113	121	192	196	96	96	135	141	121	121	164	196	100	100	1
LSjon_04_62	LilleSjona_2004	117	123	192	192	96	96	135	141	115	137	144	160	100	100	1
LSjon_04_63	LilleSjona_2004	109	111	192	192	96	96	123	135	137	147	172	172	100	104	1
LSjon_04_64	LilleSjona_2004	117	117	192	192	100	104	129	129	115	143	136	152	100	104	1
LSjon_04_65	LilleSjona_2004	105	125	192	192	96	96	126	126	115	115	148	196	100	100	1
LSjon_04_66	LilleSjona_2004	107	107	192	192	92	96	126	129	115	117	176	196	100	104	1
LSjon_04_67	LilleSjona_2004	113	141	192	196	96	100	123	129	115	115	176	184	100	100	1
LSjon_04_68	LilleSjona_2004	113	119	192	196	96	96	129	132	115	115	156	188	100	104	1
LSjon_04_69	LilleSjona_2004	115	115	192	192	92	96	126	132	135	139	172	184	100	100	1
LSjon_04_70	LilleSjona_2004	113	115	192	192	100	112	135	138	125	135	128	168	100	100	1
LSjon_04_71	LilleSjona_2004	113	119	192	192	96	96	126	135	115	119	164	184	100	100	1
LSjon_04_72	LilleSjona_2004	107	115	192	192	96	112	123	126	121	129	156	180	100	104	1
LSjon_04_73	LilleSjona_2004	111	119	192	192	104	108	135	141	115	143	172	192	100	100	1
LSjon_04_74	LilleSjona_2004	105	109	192	192	96	96	126	132	115	137	160	176	100	100	1
LSjon_04_75	LilleSjona_2004	107	109	192	192	96	96	126	129	119	125	160	200	100	104	1
LSjon_04_76	LilleSjona_2004	105	111	192	192	92	96	126	135	111	115	140	160	100	100	1
LSjon_04_77	LilleSjona_2004	109	119	192	192	96	100	135	138	145	151	164	208	100	100	1
LSjon_04_78	LilleSjona_2004	113	117	192	192	96	96	129	135	115	137	152	188	100	104	1
Hopen_04_02	Saltenfjord_Hopen_2004	107	111	192	192	96	112	129	129	127	131	160	180	100	104	1
Hopen_04_03	Saltenfjord_Hopen_2004	109	113	192	192	112	112	126	126	111	115	160	200	100	100	1
Hopen_04_04	Saltenfjord_Hopen_2004	115	119	192	192	96	96	126	129	115	139	156	200	100	100	1
Hopen_04_05	Saltenfjord_Hopen_2004	105	119	192	192	92	112	126	126	115	145	160	160	100	100	1
Hopen_04_06	Saltenfjord_Hopen_2004	109	115	192	192	96	100	126	135	115	143	172	192	100	100	1
Hopen_04_07	Saltenfjord_Hopen_2004	113	119	192	192	96	100	135	141	119	135	156	160	100	104	1
Hopen_04_08	Saltenfjord_Hopen_2004	107	109	192	192	96	96	126	132	115	115	176	184	104	104	1
Hopen_04_09	Saltenfjord_Hopen_2004	105	111	192	192	92	96	126	126	115	115	184	196	100	104	1
Hopen_04_10	Saltenfjord_Hopen_2004	109	113	192	196	96	108	129	129	115	145	168	196	100	104	1
Hopen_04_11	Saltenfjord_Hopen_2004	105	107	192	192	96	96	126	126	121	135	204	208	104	104	1
Hopen_04_12	Saltenfjord_Hopen_2004	107	113	192	192	92	92	132	132	137	141	156	180	100	100	1
Hopen_04_13	Saltenfjord_Hopen_2004	105	107	192	192	96	96	126	126	115	115	160	180	100	104	1
Hopen_04_14	Saltenfjord_Hopen_2004	111	113	192	192	96	96	129	138	131	145	144	168	100	100	1
Hopen_04_15	Saltenfjord_Hopen_2004	119	119	192	192	96	96	126	138	115	139	172	184	100	100	1
Hopen_04_16	Saltenfjord_Hopen_2004	103	111	192	192	96	96	129	135	119	139	148	156	100	100	1
Hopen_04_17	Saltenfjord_Hopen_2004	115	119	192	192	96	108	129	129	115	141	144	192	100	100	1
Hopen_04_18	Saltenfjord_Hopen_2004	107	113	192	192	96	100	126	135	117	133	164	204	100	100	1
Hopen_04_19	Saltenfjord_Hopen_2004	107	139	192	196	84	108	123	126	125	163	164	192	100	100	1
Hopen_04_21	Saltenfjord_Hopen_2004	109	141	192	192	96	100	117	126	115	137	180	184	100	100	1
Hopen_04_22	Saltenfjord_Hopen_2004	117	119	192	192	96	96	126	126	135	135	188	200	100	104	1
Hopen_04_23	Saltenfjord_Hopen_2004	109	119	192	192	96	96	126	135	125	135	184	196	100	104	1
Hopen_04_24	Saltenfjord_Hopen_2004	107	109	192	196	96	96	129	129	137	155	160	184	100	100	1
Hopen_04_25	Saltenfjord_Hopen_2004	109	121	192	196	96	96	126	132	115	115	172	172	100	104	1
Hopen_04_26	Saltenfjord_Hopen_2004	109	113	180	192	96	96	129	129	115	125	172	176	100	104	1
Hopen_04_27	Saltenfjord_Hopen_2004	107	107	192	192	96	96	123	132	115	141	192	200	100	100	1
Hopen_04_28	Saltenfjord_Hopen_2004	109	109	192	192	96	96	129	132	115	159	160	184	100	100	1
Hopen_04_29	Saltenfjord_Hopen_2004	107	113	192	192	96	96	123	132	125	131	200	200	100	100	1
Hopen_04_30	Saltenfjord_Hopen_2004	105	107	192	192	92	96	132	135	115	115	156	168	100	104	1
Hopen_04_31	Saltenfjord_Hopen_2004	113	113	192	192	92	96	135	135	115	115	156	184	100	100	1
Hopen_04_32	Saltenfjord_Hopen_2004	107	111	192	192	96	96	138	138	115	147	184	188	100	104	1
Hopen_04_33	Saltenfjord_Hopen_2004	107	109	192	192	92	96	123	132	131	139	184	196	100	100	1
Hopen_04_34	Saltenfjord_Hopen_2004	107	141	192	192	96	100	126	129	115	115	156	168	100	104	1
Hopen_04_35	Saltenfjord_Hopen_2004	111	117	192	196	96	104	129	129	115	143	172	176	100	104	1
Hopen_04_36	Saltenfjord_Hopen_2004	105	119	192	192	92	96	129	129	111	115	180	200	100	100	1
Hopen_04_37	Saltenfjord_Hopen_2004	111	141	192	192	96	96	129	132	121	151	176	204	100	100	1
Hopen_04_38	Saltenfjord_Hopen_2004	107	107	192	192	96	100	129	138	131	149	192	196	100	104	1
Hopen_04_39	Saltenfjord_Hopen_2004	113	115	192	192	92	96	126	135	145	149	148	164	100	100	1
Hopen_04_40	Saltenfjord_Hopen_2004	113	117	192	192	92	96	123	129	115	137	192	204	100	104	1
Hopen_04_41	Saltenfjord_Hopen_2004	113	117	192	192	96	96	129	132	115	115	160	164	104	104	1
Hopen_04_42	Saltenfjord_Hopen_2004	105	109	192	192	96	96	123	126	127	139	192	192	100	104	1
Hopen_04_43	Saltenfjord_Hopen_2004	111	117	192	192	92	100	126	129	115	155	200	200	100	100	1
Hopen_04_44	Saltenfjord_Hopen_2004	113	113	196	196	96	96	132	132	115	115	152	156	100	100	1
Hopen_04_45	Saltenfjord_Hopen_2004	107	107	192	192	96	100	135	138	115	145	192	192	100	100	1
Hopen_04_46	Saltenfjord_Hopen_2004	107	109	192	192	92	92	126	126	115	137	144	160	100	100	1
Hopen_04_47	Saltenfjord_Hopen_2004	109	109	192	192	100	104	126	132	115	147	168	172	100	100	1
Hopen_04_48	Saltenfjord_Hopen_2004	107	113	192	192	92	96	138	138	133	149	176	204	100	100	1
Hopen_04_49	Saltenfjord_Hopen_2004	115	117	192	192	96	96	129	135	143	149	172	184	100	100	1
Hopen_04_50	Saltenfjord_Hopen_2004	107	117	192	196	96	96	126	132	115	115	172	200	100	100	1
Hopen_04_51	Saltenfjord_Hopen_2004	107	107	192	192	88	96	129	132	133	137	168	180	100	100	1
Hopen_04_52	Saltenfjord_Hopen_2004	105	107	192	192	96	96	129	129	133	141	172	188	104	104	1
Hopen_04_54	Saltenfjord_Hopen_2004	113	119	192	192	100	100	126	138	125	163	172	176	100	100	1
Hopen_04_55	Saltenfjord_Hopen_2004	113	117	188	192	92	96	129	129	115	151	128	172	100	100	1
Hopen_04_56	Saltenfjord_Hopen_2004	111	119	192	192	96	100	123	135	115	115	164	180	100	104	1
Hopen_04_57	Saltenfjord_Hopen_2004	107	113	192	192	96	96	129	132	115	117	164	168	104	104	1
Hopen_04_58	Saltenfjord_Hopen_2004	113	113	192	192	96	96	129	135	115	115	196	212	104	104	3
Hopen_04_60	Saltenfjord_Hopen_2004	105	107	192	192	96	96	120	129	115	115	152	160	100	100	2
Hopen_04_61	Saltenfjord_Hopen_2004	107	117	188	192	96	96	126	132	115	135	156	156	100	100	1
Hopen_04_62	Saltenfjord_Hopen_2004	113	113	192	192	96	100	135	135	115	141	156	180	100	100	1
Hopen_04_63	Saltenfjord_Hopen_2004	107	119	192	192	92	100	126	135	119	125	168	176	100	100	1
Hopen_04_64	Saltenfjord_Hopen_2004	111	119	192	192	96	96	129	129	115	119	180	188	100	104	1
Hopen_04_66	Saltenfjord_Hopen_2004	109	113	188	196	96	104	129	135	115	115	164	192	100	100	1
Hopen_04_67	Saltenfjord_Hopen_2004	117	141	192	192	100	100	123	135	115	115	160	164	100	100	1
Hopen_04_68	Saltenfjord_Hopen_2004	109	117	192	192	96	96	126	129	145	145	168	176	100	100	1
Balkj_04_01	Baldkjosen_Nordfolda_2004	113	113	192	192	96	96	126	138	121	141	164	196	100	100	1
Balkj_04_02	Baldkjosen_Nordfolda_2004	129	141	192	192	96	96	126	129	131	135	156	180	100	104	1
Balkj_04_03	Baldkjosen_Nordfolda_2004	105	111	192	192	92	96	126	132	115	141	128	160	100	100	1
Balkj_04_04	Baldkjosen_Nordfolda_2004	107	119	184	192	96	104	132	141	115	131	164	192	100	100	1
Balkj_04_05	Baldkjosen_Nordfolda_2004	105	119	192	192	96	100	126	132	115	141	160	164	100	100	1
Balkj_04_06	Baldkjosen_Nordfolda_2004	107	107	192	192	100	100	123	132	125	145	144	164	100	100	1
Balkj_04_07	Baldkjosen_Nordfolda_2004	105	113	184	192	96	96	126	126	137	137	164	176	100	104	1
Balkj_04_08	Baldkjosen_Nordfolda_2004	109	113	192	192	96	96	126	126	115	115	160	164	100	104	2
Balkj_04_09	Baldkjosen_Nordfolda_2004	111	113	184	192	96	96	129	132	115	143	156	156	100	104	1
Balkj_04_10	Baldkjosen_Nordfolda_2004	113	119	192	192	92	96	129	135	115	135	164	200	100	100	1
Balkj_04_11	Baldkjosen_Nordfolda_2004	113	129	192	192	96	112	129	132	115	143	188	196	100	100	1
Balkj_04_12	Baldkjosen_Nordfolda_2004	105	105	192	196	96	104	138	138	115	141	144	204	100	100	1
Balkj_04_13	Baldkjosen_Nordfolda_2004	107	113	192	192	88	96	135	141	119	121	160	176	100	100	1
Balkj_04_14	Baldkjosen_Nordfolda_2004	109	113	192	192	96	104	129	135	125	139	140	196	100	100	1
Balkj_04_15	Baldkjosen_Nordfolda_2004	113	119	192	192	92	104	126	129	115	149	148	172	100	100	1
Balkj_04_16	Baldkjosen_Nordfolda_2004	111	123	192	196	96	96	126	135	115	115	164	176	100	100	1
Balkj_04_17	Baldkjosen_Nordfolda_2004	113	117	192	192	96	100	126	150	115	127	188	204	100	104	1
Balkj_04_18	Baldkjosen_Nordfolda_2004	105	109	192	192	84	100	126	132	115	127	172	180	100	100	1
Balkj_04_19	Baldkjosen_Nordfolda_2004	111	115	192	192	96	104	123	132	115	137	172	196	100	100	1
Balkj_04_20	Baldkjosen_Nordfolda_2004	105	107	192	192	96	100	129	129	125	143	160	164	100	100	1
Balkj_04_21	Baldkjosen_Nordfolda_2004	107	109	192	192	92	96	132	135	119	153	148	172	100	100	1
Balkj_04_22	Baldkjosen_Nordfolda_2004	111	111	188	192	92	96	129	135	115	127	184	204	100	100	1
Balkj_04_23	Baldkjosen_Nordfolda_2004	105	113	192	192	96	100	129	132	115	139	188	188	100	100	1
Balkj_04_24	Baldkjosen_Nordfolda_2004	107	117	192	192	96	96	123	129	115	135	176	184	100	100	1
Balkj_04_25	Baldkjosen_Nordfolda_2004	107	111	192	192	96	96	123	129	141	143	184	184	100	100	1
Balkj_04_26	Baldkjosen_Nordfolda_2004	105	115	192	196	96	96	126	132	115	135	188	204	100	104	1
Balkj_04_27	Baldkjosen_Nordfolda_2004	107	139	192	192	96	96	126	126	139	145	160	172	100	104	1
Balkj_04_28	Baldkjosen_Nordfolda_2004	113	119	192	192	92	96	126	129	115	125	156	196	100	100	1
Balkj_04_29	Baldkjosen_Nordfolda_2004	107	109	192	192	96	96	126	135	131	143	156	156	100	100	1
Balkj_04_30	Baldkjosen_Nordfolda_2004	107	113	192	192	96	96	126	132	119	123	152	176	100	104	1
Balkj_04_31	Baldkjosen_Nordfolda_2004	109	117	192	192	108	112	126	141	137	145	196	196	100	100	1
Balkj_04_33	Baldkjosen_Nordfolda_2004	105	113	192	192	92	96	129	138	121	133	164	164	100	100	1
Balkj_04_34	Baldkjosen_Nordfolda_2004	113	113	192	192	96	96	126	138	115	139	156	172	100	100	1
Balkj_04_35	Baldkjosen_Nordfolda_2004	107	109	192	192	88	96	126	138	115	133	156	196	100	104	1
Balkj_04_36	Baldkjosen_Nordfolda_2004	107	107	192	192	96	96	123	126	115	143	168	180	100	100	1
Balkj_04_37	Baldkjosen_Nordfolda_2004	107	117	192	192	92	96	126	129	115	129	160	204	100	100	2
Balkj_04_38	Baldkjosen_Nordfolda_2004	119	121	192	196	100	112	126	141	131	133	180	184	100	100	1
Balkj_04_39	Baldkjosen_Nordfolda_2004	109	119	188	192	92	100	126	129	115	117	160	164	100	100	1
Balkj_04_40	Baldkjosen_Nordfolda_2004	107	113	192	192	92	96	129	135	115	115	164	196	100	104	1
Balkj_04_41	Baldkjosen_Nordfolda_2004	109	117	192	192	96	96	126	129	115	137	144	208	104	104	1
Balkj_04_42	Baldkjosen_Nordfolda_2004	105	105	192	192	96	112	135	141	115	137	128	184	100	100	1
Balkj_04_43	Baldkjosen_Nordfolda_2004	109	127	192	192	96	96	123	123	115	135	148	176	100	100	1
Balkj_04_44	Baldkjosen_Nordfolda_2004	113	119	192	192	96	96	132	138	139	141	144	176	100	100	1
Balkj_04_47	Baldkjosen_Nordfolda_2004	117	117	192	196	96	100	123	132	119	157	168	172	100	104	1
Balkj_04_48	Baldkjosen_Nordfolda_2004	105	119	192	192	84	96	129	129	131	137	152	160	100	100	1
Balkj_04_49	Baldkjosen_Nordfolda_2004	107	113	192	192	96	96	126	135	115	115	160	168	100	104	1
Balkj_04_50	Baldkjosen_Nordfolda_2004	107	119	192	192	96	100	126	126	115	141	172	180	100	100	1
Balkj_04_51	Baldkjosen_Nordfolda_2004	113	119	192	192	92	100	126	132	115	115	156	172	100	100	1
Balkj_04_52	Baldkjosen_Nordfolda_2004	109	113	192	192	96	96	129	141	115	119	176	184	100	100	1
Balkj_04_53	Baldkjosen_Nordfolda_2004	107	113	192	196	96	108	123	129	137	141	156	164	100	100	1
Balkj_04_54	Baldkjosen_Nordfolda_2004	113	119	192	196	92	96	123	141	115	115	160	172	100	100	1
Balkj_04_56	Baldkjosen_Nordfolda_2004	109	113	192	192	96	96	126	126	115	125	196	200	100	100	1
Balkj_04_57	Baldkjosen_Nordfolda_2004	113	113	192	192	96	96	126	129	121	141	180	192	100	100	1
Balkj_04_59	Baldkjosen_Nordfolda_2004	107	113	188	192	92	104	123	126	115	137	168	200	100	100	1
Balkj_04_60	Baldkjosen_Nordfolda_2004	111	115	192	196	96	96	132	132	125	141	156	196	100	100	1
Balkj_04_61	Baldkjosen_Nordfolda_2004	109	115	192	196	96	104	126	126	115	115	184	212	100	104	1
Tran_04_02	Tranøybotn_2004	113	113	192	192	96	100	129	132	115	139	164	176	100	100	1
Tran_04_03	Tranøybotn_2004	115	123	192	192	92	96	132	141	133	159	140	168	100	100	1
Tran_04_04	Tranøybotn_2004	109	111	176	192	88	96	126	129	107	115	184	208	100	104	1
Tran_04_05	Tranøybotn_2004	107	117	192	192	96	108	120	129	115	115	160	184	100	104	1
Tran_04_06	Tranøybotn_2004	111	115	192	192	96	96	126	138	115	119	188	208	104	104	2
Tran_04_07	Tranøybotn_2004	111	119	176	192	96	112	123	129	107	115	152	188	100	104	1
Tran_04_08	Tranøybotn_2004	111	111	192	192	96	100	123	126	117	119	156	176	100	104	1
Tran_04_09	Tranøybotn_2004	111	129	192	192	92	100	129	138	115	135	156	196	100	100	1
Tran_04_10	Tranøybotn_2004	113	119	192	192	96	96	126	135	121	137	156	192	104	104	1
Tran_04_11	Tranøybotn_2004	105	113	192	196	96	96	123	126	115	115	180	196	104	104	1
Tran_04_12	Tranøybotn_2004	119	133	192	192	96	96	123	126	119	155	164	196	100	100	1
Tran_04_13	Tranøybotn_2004	107	107	192	192	96	104	126	138	115	135	176	184	100	104	2
Tran_04_14	Tranøybotn_2004	113	113	192	192	96	96	126	132	115	115	180	184	104	104	1
Tran_04_15	Tranøybotn_2004	109	111	192	192	96	100	123	135	115	123	152	180	100	100	1
Tran_04_16	Tranøybotn_2004	113	113	192	196	96	104	129	135	115	115	172	200	100	104	1
Tran_04_17	Tranøybotn_2004	111	113	192	192	96	96	129	141	115	115	160	204	100	100	1
Tran_04_18	Tranøybotn_2004	115	121	192	192	92	96	123	129	115	119	152	168	100	104	1
Tran_04_19	Tranøybotn_2004	111	113	192	192	96	112	129	132	117	137	180	196	100	100	1
Tran_04_20	Tranøybotn_2004	105	111	176	192	96	96	123	132	119	139	144	188	100	100	1
Tran_04_21	Tranøybotn_2004	113	119	176	192	88	96	129	141	115	137	172	180	100	104	1
Tran_04_22	Tranøybotn_2004	107	109	192	192	92	100	126	138	115	149	156	176	100	100	1
Tran_04_23	Tranøybotn_2004	109	119	176	192	96	100	123	135	135	139	168	184	100	104	1
Tran_04_24	Tranøybotn_2004	113	119	192	196	96	104	126	135	121	137	156	172	100	104	1
Tran_04_25	Tranøybotn_2004	109	113	192	192	96	96	126	129	125	133	176	192	100	100	1
Tran_04_26	Tranøybotn_2004	107	109	192	192	92	96	126	138	115	119	164	188	100	104	1
Tran_04_27	Tranøybotn_2004	111	113	184	196	96	96	126	129	119	137	176	200	100	104	1
Tran_04_28	Tranøybotn_2004	109	119	192	192	96	96	123	138	115	135	148	164	100	104	1
Tran_04_29	Tranøybotn_2004	107	109	192	192	96	96	126	132	119	137	172	204	100	104	1
Tran_04_30	Tranøybotn_2004	107	107	192	192	92	96	123	135	115	115	148	184	100	104	1
Tran_04_31	Tranøybotn_2004	107	107	192	192	96	100	123	123	115	115	176	192	100	104	1
Tran_04_32	Tranøybotn_2004	111	119	192	192	96	96	132	138	115	123	168	192	100	104	2
Tran_04_33	Tranøybotn_2004	113	117	192	192	92	96	132	135	115	115	176	192	100	100	1
Tran_04_34	Tranøybotn_2004	111	111	192	196	92	96	123	132	137	139	148	176	100	100	1
Tran_04_35	Tranøybotn_2004	107	115	192	192	96	96	123	132	115	137	164	172	100	104	1
Tran_04_36	Tranøybotn_2004	111	111	192	196	92	100	123	132	115	137	144	168	100	100	1
Tran_04_37	Tranøybotn_2004	113	113	176	192	88	96	123	135	115	125	164	168	100	104	1
Tran_04_38	Tranøybotn_2004	105	113	192	196	96	104	132	141	115	119	180	180	100	104	1
Tran_04_39	Tranøybotn_2004	121	137	192	192	96	100	126	138	115	115	156	164	100	100	1
Tran_04_40	Tranøybotn_2004	115	119	192	192	96	96	123	129	115	129	184	192	100	100	1
Tran_04_41	Tranøybotn_2004	113	113	192	192	96	104	126	126	119	139	164	192	100	104	1
Tran_04_42	Tranøybotn_2004	111	111	188	192	96	96	126	132	115	115	184	188	104	104	1
Tran_04_43	Tranøybotn_2004	109	109	176	192	96	96	126	126	143	145	192	196	100	100	1
Tran_04_44	Tranøybotn_2004	105	107	192	192	100	100	126	132	115	115	156	160	100	100	1
Tran_04_45	Tranøybotn_2004	107	111	192	192	96	96	138	141	115	115	156	212	100	104	1
Tran_04_46	Tranøybotn_2004	113	119	192	192	96	96	126	135	115	115	156	196	100	104	1
Tran_04_47	Tranøybotn_2004	109	113	192	192	92	96	129	141	135	139	160	172	100	104	1
Tran_04_48	Tranøybotn_2004	109	113	192	192	100	100	123	129	117	121	172	172	100	100	1
Tran_04_49	Tranøybotn_2004	113	141	192	192	84	96	126	132	115	137	196	200	100	100	1
Tran_04_50	Tranøybotn_2004	109	115	192	192	96	96	129	135	139	143	140	180	100	100	1
Tran_04_51	Tranøybotn_2004	115	115	192	192	96	100	123	138	115	159	172	172	100	100	1
Tran_04_52	Tranøybotn_2004	107	107	176	192	92	96	129	132	117	123	180	184	100	100	1
Tran_04_53	Tranøybotn_2004	107	115	192	192	96	100	126	132	115	115	148	172	100	104	1
Tran_04_54	Tranøybotn_2004	113	117	176	192	88	96	126	141	117	137	156	172	100	104	1
Tran_04_55	Tranøybotn_2004	107	113	192	192	96	100	126	141	115	121	176	184	100	104	1
Tran_04_56	Tranøybotn_2004	105	107	192	192	96	96	129	132	115	141	132	196	100	104	1
Tran_04_57	Tranøybotn_2004	105	109	192	192	96	96	132	135	115	141	144	164	100	104	1
Tran_04_58	Tranøybotn_2004	107	119	192	192	96	100	126	129	115	137	160	200	100	100	1
Tran_04_59	Tranøybotn_2004	113	113	168	188	96	96	126	132	125	147	172	176	100	100	1
Tran_04_60	Tranøybotn_2004	105	107	192	192	96	96	129	132	115	145	152	156	100	104	1
Tran_04_61	Tranøybotn_2004	107	125	192	192	96	96	126	138	115	115	164	180	104	104	1
Tran_04_64	Tranøybotn_2004	105	123	192	192	92	112	126	126	115	115	180	192	100	100	1
Tran_04_65	Tranøybotn_2004	107	113	192	196	92	96	129	135	115	115	168	184	100	100	1
Tran_04_66	Tranøybotn_2004	105	107	192	192	96	96	126	135	135	137	160	200	100	100	1
Tran_04_67	Tranøybotn_2004	107	113	168	192	96	96	126	138	115	115	172	204	100	104	1
Tran_04_68	Tranøybotn_2004	109	111	188	192	88	96	117	129	115	115	184	184	104	104	1
Tran_04_69	Tranøybotn_2004	107	115	192	192	96	96	132	135	115	115	164	188	100	104	1
Tran_04_70	Tranøybotn_2004	107	107	176	192	88	96	120	135	115	115	180	200	104	104	1
Tran_04_72	Tranøybotn_2004	109	113	192	192	92	96	126	132	115	137	168	200	100	100	1
Tran_04_73	Tranøybotn_2004	107	113	180	188	96	100	129	129	119	137	180	188	100	100	1
Tran_04_74	Tranøybotn_2004	109	113	192	192	92	96	126	138	121	137	176	176	100	104	1
Tran_04_75	Tranøybotn_2004	113	141	192	192	96	96	132	141	119	159	188	192	100	104	1
Tran_04_76	Tranøybotn_2004	123	141	188	192	92	104	123	129	115	115	148	208	100	104	1
Tran_04_77	Tranøybotn_2004	107	133	192	192	96	104	126	132	115	115	184	184	100	104	1
Tran_04_78	Tranøybotn_2004	107	107	192	192	96	96	129	141	115	117	176	208	104	104	1
Tran_04_80	Tranøybotn_2004	107	119	192	192	96	96	129	138	115	115	164	176	100	100	1
Tran_04_81	Tranøybotn_2004	113	141	192	192	96	96	129	132	115	115	172	184	100	100	1
Tran_04_82	Tranøybotn_2004	107	113	192	192	96	96	135	138	115	153	180	184	100	104	1
Tran_04_84	Tranøybotn_2004	113	113	176	192	96	100	138	138	115	119	164	172	104	104	1
Tran_04_88	Tranøybotn_2004	107	119	192	196	96	104	129	138	115	119	172	196	100	100	1
Tran_04_89	Tranøybotn_2004	119	121	192	192	92	96	123	132	135	139	156	196	100	100	1
Tran_04_90	Tranøybotn_2004	105	109	192	192	96	96	135	138	115	127	156	176	100	104	1
[truncated: 2,347 more rows]

## Sheet: Dataset 2
ID	Population	Gmo2_a	Gmo2_b	Gmo3_a	Gmo3_b	Gmo34_a	Gmo34_b	Gmo35_a	Gmo35_b	Gmo132_a	Gmo132_b	Tch11_a	Tch11_b	GmoC18_a	GmoC18_b	GmoC20_a	GmoC20_b	Gmo G13_a	Gmo G13_b	GmoG18_a	GmoG18_b	Gmo G25_a	Gmo G25_b	Gmo G40_a	Gmo G40_b	Gmo G43_a	Gmo G43_b	Gmo G45_a	Gmo G45_b	Tch22_a	Tch22_b	PanI_a	PanI_b	Otolith type
Smor_03_01	Smørfjord_2003	105	111	192	192	96	96	123	132	115	117	160	168	152	152	122	143	207	211	133	133	263	263	247	247	157	169	134	136	93	93	100	100	1
Smor_03_03	Smørfjord_2003	105	115	192	192	96	96	129	135	115	115	144	184	152	155	128	152	205	205	117	133	245	267	243	247	151	165	136	144	89	89	100	104	1
Smor_03_11	Smørfjord_2003	113	113	192	192	92	100	132	141	115	115	184	188	155	161	122	137	197	197	117	133	261	261	241	241	163	163	138	212	89	93	100	100	1
Smor_03_12	Smørfjord_2003	107	113	192	192	96	96	126	135	115	159	156	188	158	164	122	155	197	215	133	133	0	0	241	241	141	167	134	172	93	93	100	104	1
Smor_03_13	Smørfjord_2003	109	119	192	192	84	96	129	135	115	115	172	188	152	164	125	137	207	207	117	133	267	267	243	243	137	159	134	170	85	85	100	100	1
Smor_03_14	Smørfjord_2003	105	113	192	196	96	100	123	135	137	141	148	164	155	173	122	122	197	197	117	117	277	279	239	241	153	157	176	192	93	93	100	104	1
Smor_03_15	Smørfjord_2003	113	113	192	192	96	96	123	129	115	145	180	192	155	167	122	125	197	197	117	133	253	289	239	241	141	141	176	194	85	89	100	100	1
Smor_03_16	Smørfjord_2003	113	117	192	192	92	96	126	129	115	115	144	156	152	155	116	122	197	197	117	133	0	0	245	247	169	169	144	144	85	89	100	100	2
Smor_03_17	Smørfjord_2003	111	113	192	192	92	96	129	135	115	115	168	168	149	155	122	125	197	197	117	133	265	267	241	249	141	157	132	158	89	93	100	100	1
Smor_03_19	Smørfjord_2003	107	113	192	192	96	96	123	126	115	115	156	180	146	170	140	158	197	197	117	133	267	281	239	241	153	163	138	150	89	93	100	100	1
Smor_03_20	Smørfjord_2003	105	119	192	192	96	100	126	126	117	145	160	176	155	161	122	161	197	197	117	133	0	0	239	241	157	159	134	140	89	89	100	100	1
Smor_03_21	Smørfjord_2003	113	113	192	192	96	100	129	132	115	115	172	184	146	152	122	122	197	201	117	117	0	0	245	245	141	163	136	138	93	93	100	100	1
Smor_03_22	Smørfjord_2003	107	119	192	192	96	100	126	126	121	151	160	196	152	161	125	125	197	213	117	133	265	265	239	241	147	151	134	172	89	89	100	100	1
Smor_03_23	Smørfjord_2003	113	119	192	192	96	96	126	135	141	157	160	192	152	152	137	155	209	215	133	133	255	269	241	241	141	143	136	174	89	93	100	104	1
Smor_03_24	Smørfjord_2003	113	113	192	192	96	96	129	135	115	121	140	148	152	167	131	149	207	211	117	133	0	0	247	247	0	0	0	0	85	85	100	100	2
Smor_03_25	Smørfjord_2003	113	115	192	192	96	96	129	141	115	135	160	172	146	170	116	152	197	197	0	0	261	263	241	245	155	155	172	178	89	89	100	100	1
Smor_03_26	Smørfjord_2003	109	111	192	192	96	96	129	138	115	121	144	200	152	182	122	122	197	209	133	133	265	267	245	247	141	169	176	178	93	93	100	104	2
Smor_03_28	Smørfjord_2003	107	107	192	192	96	112	129	132	115	143	148	160	149	152	122	140	207	211	117	117	257	257	243	243	153	161	136	172	89	89	100	100	1
Smor_03_29	Smørfjord_2003	109	119	192	192	96	100	126	129	115	115	176	176	152	155	122	152	209	209	117	117	269	281	239	241	139	163	134	146	85	93	100	104	1
Smor_03_31	Smørfjord_2003	117	119	192	192	96	100	138	138	115	115	140	180	158	164	143	146	197	197	117	117	265	265	243	243	141	169	136	192	89	93	100	104	1
Smor_03_32	Smørfjord_2003	105	113	192	192	92	96	123	129	115	119	172	192	161	161	125	149	197	209	117	117	0	0	249	249	147	155	144	144	93	93	100	100	1
Smor_03_33	Smørfjord_2003	109	111	192	192	96	96	132	135	131	139	172	188	155	161	125	128	213	217	117	133	269	275	241	249	133	161	190	198	89	93	100	100	1
Smor_03_38	Smørfjord_2003	105	117	192	192	96	96	126	135	115	115	164	164	140	146	143	158	197	209	133	133	0	0	241	243	155	169	134	134	89	93	100	104	1
Smor_03_39	Smørfjord_2003	107	107	192	192	96	96	123	123	115	117	168	168	149	152	140	146	197	197	117	117	0	0	239	245	145	159	134	166	93	93	100	100	1
Smor_03_40	Smørfjord_2003	119	119	192	192	96	112	126	129	115	143	188	192	152	161	137	152	197	197	117	133	265	265	241	245	161	175	150	184	89	89	100	100	2
Smor_03_42	Smørfjord_2003	107	107	192	192	96	100	126	129	115	221	160	220	158	161	122	137	197	197	133	133	0	0	243	245	141	149	136	190	89	89	100	104	1
Smor_03_44	Smørfjord_2003	113	119	192	192	92	96	123	135	115	147	188	204	140	173	122	122	197	197	117	133	255	285	241	245	147	163	180	198	89	93	100	100	1
Smor_03_45	Smørfjord_2003	107	121	192	192	96	100	129	132	115	119	176	200	152	161	128	149	197	207	117	117	0	0	243	243	151	169	134	176	85	85	100	100	2
Smor_03_46	Smørfjord_2003	113	113	188	192	96	96	126	132	115	119	152	168	155	161	125	143	197	205	133	133	0	0	243	245	161	161	138	196	93	93	100	104	1
Smor_03_48	Smørfjord_2003	113	113	192	192	96	96	126	135	115	115	144	164	152	155	122	128	197	197	0	0	0	0	239	245	141	159	134	136	0	0	100	104	1
Smor_03_51	Smørfjord_2003	109	119	168	192	96	96	132	141	115	115	172	176	149	164	152	158	207	209	117	117	279	281	239	249	151	157	138	178	0	0	100	100	1
Smor_03_52	Smørfjord_2003	109	121	192	192	96	108	126	135	115	115	196	212	143	149	122	155	207	213	0	0	0	0	241	241	133	141	134	136	0	0	100	100	1
Smor_03_53	Smørfjord_2003	113	113	192	192	84	96	135	147	115	115	168	172	146	152	116	122	197	197	0	0	0	0	241	247	153	153	136	154	89	89	100	104	1
Smor_03_54	Smørfjord_2003	107	113	192	192	92	96	129	135	115	121	192	204	155	161	128	149	197	206	0	0	0	0	245	249	141	153	138	142	85	93	100	100	1
Smor_03_55	Smørfjord_2003	113	113	192	192	92	96	129	135	115	115	148	156	146	149	122	143	197	207	0	0	0	0	243	243	153	157	136	138	89	89	100	100	2
Smor_03_56	Smørfjord_2003	107	107	192	192	96	96	126	129	115	115	132	184	146	164	134	146	209	211	133	133	261	277	241	243	137	149	138	138	89	89	100	104	1
Smor_03_57	Smørfjord_2003	111	113	192	196	96	96	129	132	135	137	164	200	152	164	125	146	197	197	0	0	0	0	245	247	161	179	176	176	89	93	100	100	1
Smor_03_58	Smørfjord_2003	115	115	192	192	96	96	123	135	115	139	140	156	152	158	122	122	197	207	0	0	0	0	241	249	149	171	134	146	0	0	100	104	1
Smor_03_59	Smørfjord_2003	107	113	192	196	88	96	126	132	115	115	172	180	149	170	116	152	197	197	0	0	0	0	241	241	141	159	134	144	85	93	100	100	1
Smor_03_60	Smørfjord_2003	107	111	192	192	96	112	129	132	119	135	148	152	155	155	122	143	197	197	0	0	0	0	239	243	143	163	142	186	0	0	100	104	2
Smor_03_61	Smørfjord_2003	109	111	192	192	92	96	129	141	115	115	176	184	152	152	116	116	197	207	133	133	259	259	241	245	161	165	136	174	89	89	100	100	1
Smor_03_62	Smørfjord_2003	107	109	192	192	96	96	123	135	115	169	156	156	158	158	143	152	207	207	0	0	0	0	241	249	139	151	176	184	0	0	100	104	2
Smor_03_63	Smørfjord_2003	113	119	192	192	96	96	129	129	115	115	164	176	155	164	152	155	197	197	133	133	0	0	239	239	161	167	136	138	89	89	100	100	1
Smor_03_65	Smørfjord_2003	113	123	192	192	96	96	126	135	115	115	192	204	149	149	122	125	197	209	117	133	257	289	239	245	133	145	136	148	85	85	100	104	1
Smor_03_66	Smørfjord_2003	113	119	192	192	96	96	126	129	119	141	148	188	164	167	125	143	207	211	0	0	0	0	239	243	141	155	134	200	89	89	100	104	1
Smor_03_67	Smørfjord_2003	107	113	192	192	96	96	123	129	115	117	148	180	155	167	140	143	197	215	0	0	0	0	239	245	145	175	138	138	89	93	100	104	1
Smor_03_68	Smørfjord_2003	113	119	192	192	92	96	129	132	115	121	160	204	149	152	125	125	197	205	117	117	259	259	241	249	145	163	136	146	89	89	100	100	1
Smor_03_70	Smørfjord_2003	113	115	192	192	96	100	126	132	115	121	172	196	146	155	122	122	197	209	133	133	0	0	241	241	141	157	136	144	93	93	100	100	1
Smor_03_71	Smørfjord_2003	107	107	192	192	96	104	126	129	115	137	144	184	149	161	122	125	197	207	0	0	265	265	243	245	157	173	136	196	85	89	100	104	1
Smor_03_73	Smørfjord_2003	113	113	192	192	96	96	126	132	115	115	176	200	149	164	122	122	207	207	117	133	265	269	241	241	159	169	140	140	93	93	100	104	1
Smor_03_74	Smørfjord_2003	107	115	192	192	96	96	132	132	115	115	164	164	146	167	122	122	197	197	117	133	0	0	241	241	169	175	144	178	89	89	100	100	1
Smor_03_75	Smørfjord_2003	117	117	192	192	100	104	126	135	115	115	172	184	152	161	122	140	197	197	117	133	265	271	239	249	145	163	134	138	89	89	100	100	1
Smor_03_76	Smørfjord_2003	109	111	192	196	96	100	123	126	115	119	160	212	149	152	134	149	211	211	117	117	277	279	243	245	149	155	138	148	85	85	100	104	1
Smor_03_77	Smørfjord_2003	109	111	192	192	96	112	123	129	115	115	160	164	143	161	116	158	197	207	117	133	261	275	239	239	163	163	144	180	85	89	100	100	1
Smor_03_78	Smørfjord_2003	107	119	192	192	92	104	123	129	115	143	156	172	149	167	140	152	197	205	117	133	269	269	241	249	149	159	182	190	85	93	100	100	1
Smor_03_79	Smørfjord_2003	115	115	192	192	96	100	126	129	115	115	172	192	146	158	116	122	197	207	117	117	261	261	241	241	149	169	136	138	89	89	100	100	1
Smor_03_80	Smørfjord_2003	113	113	192	192	96	96	126	138	115	115	156	184	167	170	116	137	197	197	117	117	269	269	243	245	141	157	134	138	85	85	100	104	1
Smor_03_81	Smørfjord_2003	107	107	192	192	96	96	135	141	115	115	160	188	149	161	122	155	197	207	117	133	0	0	243	245	151	153	134	134	89	89	104	104	2
Smor_03_82	Smørfjord_2003	105	111	192	192	96	100	132	141	115	129	144	148	149	170	116	146	197	211	0	0	0	0	239	245	149	159	144	176	0	0	100	100	1
Smor_03_84	Smørfjord_2003	107	107	192	192	96	96	129	135	115	119	156	180	146	158	122	122	197	207	117	117	0	0	241	245	157	169	144	144	85	89	100	100	1
Smor_03_85	Smørfjord_2003	109	113	192	192	92	96	123	132	129	151	184	196	155	161	116	122	211	211	117	133	0	0	245	247	133	141	194	198	85	85	100	104	1
Smor_03_87	Smørfjord_2003	107	109	188	196	96	108	123	141	137	159	168	184	149	155	110	128	197	211	117	133	257	285	239	243	139	169	184	186	85	93	100	104	2
Smor_03_88	Smørfjord_2003	119	119	192	192	96	100	126	132	115	137	172	192	152	152	146	146	197	207	117	133	261	263	239	243	141	153	136	178	89	93	100	104	1
Smor_03_89	Smørfjord_2003	107	107	188	192	92	96	126	126	115	119	172	180	155	155	122	125	197	197	117	117	267	273	241	241	153	159	134	182	0	0	100	100	1
Smor_03_90	Smørfjord_2003	107	107	192	192	96	96	126	135	115	145	128	160	155	155	128	134	197	205	117	117	0	0	241	241	161	173	132	192	85	89	100	104	2
Smor_03_91	Smørfjord_2003	111	119	192	192	96	96	129	132	115	143	160	200	155	158	116	122	197	197	0	0	0	0	239	241	141	151	134	148	85	89	100	100	1
Smor_03_92	Smørfjord_2003	109	111	192	192	96	96	129	132	115	115	164	180	161	167	122	143	197	197	0	0	271	279	239	245	131	163	136	136	0	0	100	100	1
Smor_03_93	Smørfjord_2003	115	119	192	192	92	100	129	129	115	119	164	200	149	161	143	146	197	211	0	0	281	281	241	241	133	169	134	174	89	89	100	100	2
Bals_03_02	Balsfjord_2003	109	119	192	192	96	100	126	129	115	115	188	188	167	167	122	158	197	197	0	0	305	311	241	245	157	157	148	166	89	89	100	100	1
Bals_03_03	Balsfjord_2003	109	113	192	192	96	96	126	129	119	119	148	172	158	158	110	149	197	197	117	117	267	269	245	245	151	157	140	184	89	93	100	104	1
Bals_03_05	Balsfjord_2003	113	129	192	192	96	96	129	141	115	115	152	156	149	161	116	122	197	215	117	117	249	293	243	243	165	169	142	144	0	0	100	100	2
Bals_03_06	Balsfjord_2003	107	113	192	192	96	96	135	138	119	137	160	192	155	161	128	140	197	197	117	133	263	273	241	245	141	157	144	188	89	93	100	100	1
Bals_03_07	Balsfjord_2003	107	107	192	192	96	96	132	135	119	123	172	208	146	152	149	158	197	201	117	133	271	281	241	241	173	173	134	142	89	93	100	104	1
Bals_03_08	Balsfjord_2003	109	109	192	192	96	96	129	129	119	131	164	184	146	152	137	140	197	209	117	133	269	291	239	239	147	157	188	198	89	93	100	100	1
Bals_03_09	Balsfjord_2003	107	119	192	192	92	100	129	135	139	145	156	168	161	164	122	125	197	197	117	133	265	271	245	245	137	141	170	178	0	0	100	100	1
Bals_03_10	Balsfjord_2003	109	113	188	192	96	112	129	132	115	167	156	172	146	149	137	149	197	197	117	117	283	285	239	243	131	141	134	178	0	0	100	100	1
Bals_03_11	Balsfjord_2003	107	107	192	208	96	96	132	141	119	125	156	164	152	164	116	143	197	211	117	133	267	273	239	239	149	155	170	194	89	93	100	104	1
Bals_03_13	Balsfjord_2003	107	107	192	196	92	96	129	141	115	141	180	180	164	164	116	122	197	197	117	133	259	293	241	245	149	153	134	190	89	93	100	100	1
Bals_03_14	Balsfjord_2003	107	107	192	192	96	100	126	126	115	115	188	192	155	164	128	143	205	213	117	133	253	301	241	241	141	157	136	144	93	93	100	100	2
Bals_03_15	Balsfjord_2003	113	141	192	192	96	96	123	150	115	121	144	184	149	155	122	122	197	197	117	133	261	283	241	243	151	153	166	170	89	93	100	104	1
Bals_03_16	Balsfjord_2003	107	141	192	192	96	96	129	132	115	115	168	200	164	164	125	134	197	207	117	133	287	287	241	241	157	163	136	156	93	93	100	104	1
Bals_03_17	Balsfjord_2003	119	119	192	192	96	96	126	129	115	115	164	188	158	161	134	149	211	211	133	133	251	261	241	241	145	169	158	178	0	0	100	104	1
Bals_03_18	Balsfjord_2003	107	115	192	192	104	112	126	132	131	139	140	192	146	149	122	152	197	205	133	133	267	271	239	239	145	145	178	192	89	93	100	100	2
Bals_03_19	Balsfjord_2003	107	113	192	192	96	112	129	132	115	137	172	172	152	167	122	155	197	197	117	117	265	265	245	245	147	157	144	174	85	89	100	100	2
Bals_03_20	Balsfjord_2003	107	129	192	192	96	96	123	138	115	137	176	196	149	149	125	137	197	211	133	133	279	291	245	245	157	169	132	200	89	93	100	104	1
Bals_03_21	Balsfjord_2003	105	111	192	192	92	96	126	132	115	127	160	172	146	149	125	125	197	207	117	133	267	289	245	265	163	163	138	168	89	93	100	104	1
Bals_03_22	Balsfjord_2003	107	117	192	196	92	96	123	135	115	121	160	160	146	146	116	146	207	209	117	133	271	281	245	245	131	151	134	134	85	93	100	104	1
Bals_03_23	Balsfjord_2003	113	113	192	192	96	96	129	135	115	143	156	172	149	158	116	137	207	209	117	117	277	281	245	269	159	169	148	174	93	93	100	100	1
Bals_03_27	Balsfjord_2003	107	141	192	192	96	100	126	132	115	115	160	168	152	164	125	125	197	197	117	133	277	291	245	247	145	155	156	184	89	89	100	100	1
Bals_03_28	Balsfjord_2003	109	113	192	192	92	96	126	132	115	125	128	164	149	152	122	146	197	197	133	133	257	319	241	245	141	155	162	204	89	89	100	100	1
Bals_03_30	Balsfjord_2003	109	117	192	192	100	104	126	126	119	159	164	184	152	161	125	146	197	213	133	133	273	291	241	247	141	165	178	180	89	93	100	100	1
Bals_03_31	Balsfjord_2003	107	109	192	192	96	108	126	126	115	137	176	208	152	164	122	146	197	209	133	133	243	275	241	241	141	173	138	184	89	89	100	100	1
Bals_03_32	Balsfjord_2003	109	145	192	192	96	100	129	135	115	119	168	168	146	155	140	146	197	197	117	133	267	271	245	247	155	157	136	156	89	93	104	104	2
Bals_03_33	Balsfjord_2003	107	111	192	192	96	96	129	138	115	145	160	168	152	167	116	158	197	211	129	133	277	299	245	245	141	169	160	186	89	89	100	100	1
Bals_03_34	Balsfjord_2003	107	113	192	192	96	96	123	138	115	115	160	168	146	158	116	134	197	197	117	133	267	267	239	239	141	147	138	178	0	0	100	104	2
Bals_03_35	Balsfjord_2003	115	115	192	192	100	104	126	126	115	121	156	204	158	158	137	155	197	197	117	133	261	295	243	245	155	173	138	166	0	0	100	100	1
Bals_03_36	Balsfjord_2003	107	113	192	192	96	96	132	132	115	129	164	172	152	152	116	122	205	217	117	117	269	269	239	239	141	177	140	174	89	93	100	100	1
Bals_03_37	Balsfjord_2003	107	115	192	192	96	100	126	129	115	115	148	164	164	164	122	122	197	207	117	133	265	269	241	241	147	149	132	178	93	93	100	100	2
Bals_03_39	Balsfjord_2003	115	121	192	192	96	96	129	135	117	119	164	168	152	167	140	158	207	211	117	117	277	293	243	247	159	161	136	138	89	93	100	100	1
Bals_03_40	Balsfjord_2003	107	113	192	192	96	104	126	126	115	115	172	196	146	155	110	155	197	207	117	133	283	289	245	245	171	171	134	186	89	89	100	104	1
Bals_03_41	Balsfjord_2003	107	109	192	196	96	100	126	132	115	137	172	172	152	158	116	122	207	207	133	133	275	283	245	245	141	157	172	172	89	93	100	104	2
Bals_03_42	Balsfjord_2003	109	111	192	192	96	96	129	135	115	115	184	204	152	161	116	155	197	209	117	117	261	289	245	245	131	173	160	178	0	0	100	104	1
Bals_03_43	Balsfjord_2003	111	111	192	192	92	96	126	135	115	119	172	176	152	158	122	137	213	213	117	133	293	293	241	241	141	161	138	158	89	93	100	100	1
Bals_03_44	Balsfjord_2003	111	119	192	192	96	100	129	135	111	115	172	176	155	164	152	161	197	197	117	133	269	291	0	0	153	157	136	146	89	93	100	104	2
Bals_03_47	Balsfjord_2003	107	119	192	192	92	96	129	135	115	115	140	192	155	167	116	122	205	215	133	133	277	289	241	245	157	157	130	138	89	93	100	100	1
Bals_03_48	Balsfjord_2003	111	113	192	192	96	96	132	141	115	115	192	204	149	155	122	122	211	211	133	133	267	267	245	249	141	145	150	180	89	93	100	100	1
Bals_03_49	Balsfjord_2003	107	115	188	192	92	96	126	126	115	115	160	172	149	152	122	125	211	211	117	133	289	291	239	241	149	157	134	156	93	93	100	104	1
Bals_03_50	Balsfjord_2003	109	119	192	192	92	96	123	126	115	135	180	188	149	158	122	122	205	211	133	133	253	295	239	245	153	155	136	162	89	93	100	104	1
Bals_03_51	Balsfjord_2003	107	113	192	192	96	96	129	138	115	119	180	180	149	173	143	146	211	211	117	133	267	283	245	245	131	141	136	138	89	93	100	104	1
Bals_03_52	Balsfjord_2003	113	127	192	192	96	96	135	138	115	115	184	184	155	158	149	158	197	197	117	133	267	277	241	241	153	159	140	144	81	89	100	104	1
Bals_03_53	Balsfjord_2003	111	113	192	192	96	100	126	132	115	115	172	176	155	164	122	137	197	207	117	133	255	269	239	245	141	171	176	186	89	93	100	100	1
Bals_03_55	Balsfjord_2003	107	113	184	192	92	96	123	132	119	125	196	200	146	167	116	146	207	211	133	133	0	0	0	0	155	159	0	0	89	93	100	100	1
Bals_03_56	Balsfjord_2003	109	119	192	192	100	112	135	135	115	209	156	188	149	155	122	143	207	211	117	133	265	291	241	245	155	159	134	138	0	0	100	100	1
Bals_03_57	Balsfjord_2003	111	113	192	192	92	104	132	132	115	119	156	184	152	155	116	140	211	211	117	133	283	295	247	249	141	163	134	136	89	89	100	100	1
Bals_03_58	Balsfjord_2003	109	117	192	192	92	96	132	135	115	115	140	188	149	158	125	146	209	209	117	133	265	271	243	245	157	159	138	186	89	89	100	100	1
Bals_03_59	Balsfjord_2003	113	119	192	192	96	96	129	129	115	121	152	184	152	164	125	128	197	209	133	133	259	267	241	241	151	153	136	136	89	89	100	104	1
Bals_03_60	Balsfjord_2003	109	113	192	192	96	96	0	0	115	143	156	196	164	170	143	152	197	197	133	133	283	299	239	245	159	173	136	174	0	0	100	100	1
Bals_03_61	Balsfjord_2003	107	113	192	192	96	96	132	141	115	119	156	172	149	164	128	134	197	209	117	117	261	275	241	243	147	157	136	144	89	89	100	100	1
Bals_03_62	Balsfjord_2003	107	109	192	192	96	100	126	129	115	119	160	196	146	161	146	152	197	205	117	117	283	283	241	243	161	161	136	144	0	0	100	100	1
Bals_03_63	Balsfjord_2003	107	109	192	192	96	96	126	132	115	125	164	176	152	164	116	122	197	197	117	133	253	253	241	247	159	161	136	138	89	93	100	104	1
Bals_03_66	Balsfjord_2003	109	119	192	192	96	96	123	135	115	119	160	216	146	173	146	152	197	201	117	133	0	0	241	241	149	151	138	140	89	89	100	104	1
Bals_03_67	Balsfjord_2003	113	117	192	192	96	96	123	135	115	145	164	204	146	149	122	125	197	197	117	133	243	291	243	245	141	157	134	140	89	89	100	100	1
Bals_03_68	Balsfjord_2003	109	111	192	192	96	100	126	135	115	127	164	168	164	164	140	146	197	209	133	133	261	271	239	239	151	175	140	148	93	93	100	100	1
Bals_03_69	Balsfjord_2003	113	133	192	192	96	104	123	132	117	153	172	184	161	161	116	122	197	211	117	133	259	265	245	249	145	159	136	172	89	89	100	100	1
Bals_03_72	Balsfjord_2003	107	117	192	192	96	96	126	132	115	119	156	176	137	161	122	140	197	197	117	133	275	287	239	245	151	163	190	204	93	93	100	104	1
Bals_03_75	Balsfjord_2003	109	113	184	192	96	112	129	138	115	145	168	200	152	170	122	143	197	207	117	117	269	269	241	245	157	159	158	192	89	89	100	100	1
Bals_03_76	Balsfjord_2003	105	119	192	192	96	96	132	132	115	121	156	180	152	158	0	0	209	215	0	0	265	267	243	243	145	151	134	186	0	0	100	104	1
Bals_03_77	Balsfjord_2003	113	119	192	192	96	112	126	141	115	115	164	180	146	173	116	122	197	215	117	133	277	287	245	245	137	155	136	178	89	89	100	100	1
Bals_03_78	Balsfjord_2003	113	113	192	192	96	100	126	135	115	115	176	184	149	149	122	122	197	205	117	133	261	271	241	247	153	173	134	172	89	93	100	100	1
Bals_03_80	Balsfjord_2003	107	113	192	196	96	96	129	132	129	159	156	200	152	152	122	137	197	197	133	133	247	277	245	245	141	143	186	198	89	93	100	100	1
Bals_03_81	Balsfjord_2003	107	119	192	196	96	96	129	132	119	129	160	200	146	152	128	152	197	205	133	133	291	291	241	245	139	141	136	188	97	97	100	100	1
Bals_03_82	Balsfjord_2003	109	113	192	192	96	96	132	135	115	125	164	188	149	161	116	122	205	207	117	133	0	0	241	245	141	143	134	200	93	93	100	100	1
Bals_03_83	Balsfjord_2003	107	113	192	196	96	96	135	141	115	137	176	204	161	161	125	140	197	209	117	133	273	279	241	245	151	173	144	198	89	89	104	104	1
Bals_03_84	Balsfjord_2003	107	113	192	196	92	92	132	138	115	115	156	184	0	0	122	137	197	197	133	133	247	283	241	241	131	133	140	180	93	93	100	100	1
Bals_03_85	Balsfjord_2003	113	115	192	192	96	96	129	132	115	135	192	204	149	152	137	155	205	207	133	133	263	263	245	245	163	191	142	180	0	0	100	100	1
Bals_03_86	Balsfjord_2003	105	107	192	192	96	100	126	126	115	115	168	180	146	155	122	125	197	197	133	133	269	295	241	245	141	153	142	178	0	0	100	104	2
Bals_03_87	Balsfjord_2003	105	117	192	192	96	96	126	132	115	143	160	204	146	158	134	152	197	205	117	133	289	289	241	245	141	157	138	178	89	89	100	100	1
Bals_03_88	Balsfjord_2003	107	117	192	192	96	112	129	141	119	131	184	204	152	152	116	140	197	213	117	133	279	287	241	241	141	175	174	206	0	0	100	100	1
Bals_03_89	Balsfjord_2003	107	109	192	192	96	112	135	138	115	115	172	208	167	167	122	137	197	205	117	133	263	275	241	241	141	153	134	140	0	0	100	104	1
Bals_03_90	Balsfjord_2003	113	113	192	192	96	100	129	129	115	119	140	164	158	167	125	146	197	207	0	0	0	0	241	241	145	151	132	176	89	89	100	100	1
Bals_03_91	Balsfjord_2003	113	113	192	196	100	112	129	129	115	121	168	200	149	155	146	158	197	207	129	133	0	0	243	249	141	169	144	156	0	0	100	100	1
Bals_03_92	Balsfjord_2003	105	113	192	192	96	104	123	132	125	139	172	184	143	158	122	125	197	197	117	133	283	289	245	245	141	151	172	186	81	85	100	104	1
Bals_03_94	Balsfjord_2003	107	117	192	192	96	96	132	135	119	121	160	172	158	173	116	122	197	197	117	133	293	295	241	245	167	169	136	144	89	93	100	100	1
Bals_03_95	Balsfjord_2003	107	111	192	192	96	96	132	132	115	143	164	184	158	167	122	140	197	205	133	133	277	277	241	247	155	169	134	156	0	0	100	100	1
Bals_03_96	Balsfjord_2003	109	113	188	192	96	104	129	138	115	137	152	184	146	149	134	140	197	197	117	133	281	289	239	241	131	141	134	186	0	0	100	100	1
Tran_05_01	Tranøybotn_2005	109	113	192	192	92	96	123	126	115	115	172	184	152	179	116	116	197	197	133	133	273	277	245	245	145	149	134	134	85	93	100	104	1
Tran_05_02	Tranøybotn_2005	109	111	192	192	96	96	123	135	121	123	0	0	164	167	122	152	207	215	117	133	257	281	245	245	153	163	136	178	93	93	100	104	1
Tran_05_03	Tranøybotn_2005	107	107	192	192	96	96	129	132	115	139	184	204	152	158	128	146	197	197	117	133	263	279	245	245	141	159	176	190	0	0	100	104	1
Tran_05_04	Tranøybotn_2005	105	119	192	192	96	112	126	138	115	115	164	164	155	164	122	143	197	207	133	133	287	287	239	245	145	157	136	144	89	89	100	104	1
Tran_05_05	Tranøybotn_2005	109	109	192	192	96	100	126	138	115	137	156	180	158	161	116	152	197	207	133	133	267	299	0	0	151	151	134	140	0	0	100	104	1
Tran_05_06	Tranøybotn_2005	107	107	192	196	96	96	123	129	137	137	184	196	155	158	113	128	197	197	121	133	287	287	241	247	145	173	134	134	89	89	100	104	2
Tran_05_07	Tranøybotn_2005	113	119	192	196	96	104	0	0	115	115	156	160	152	164	122	149	197	209	133	133	255	293	251	251	141	151	0	0	89	89	104	104	1
Tran_05_08	Tranøybotn_2005	107	113	192	192	96	96	135	138	121	135	160	176	146	146	146	158	197	197	117	133	273	283	241	241	141	171	134	144	85	97	100	100	1
Tran_05_09	Tranøybotn_2005	109	115	192	192	96	100	135	135	115	135	156	184	152	152	122	146	211	211	117	133	287	287	239	241	153	153	138	186	0	0	100	100	1
Tran_05_10	Tranøybotn_2005	107	111	192	192	92	96	129	132	131	147	148	172	152	161	122	143	197	207	117	117	253	275	0	0	149	163	138	186	89	89	100	104	1
Tran_05_12	Tranøybotn_2005	107	115	192	192	96	96	132	135	115	159	172	176	149	152	122	122	197	197	133	133	263	283	241	241	157	167	186	186	85	85	100	100	1
Tran_05_13	Tranøybotn_2005	107	109	192	192	96	96	126	132	115	121	184	196	146	152	122	143	197	197	117	133	271	333	239	241	145	155	134	138	89	89	100	100	1
Tran_05_14	Tranøybotn_2005	109	119	192	192	96	96	129	129	115	135	156	184	149	158	122	143	207	207	117	133	257	295	241	247	147	165	142	176	85	85	100	100	1
Tran_05_15	Tranøybotn_2005	107	119	192	192	96	96	132	132	117	137	212	212	155	155	122	125	197	197	117	133	287	309	245	247	149	169	136	204	85	85	100	100	1
Tran_05_16	Tranøybotn_2005	107	119	192	192	96	96	123	132	115	115	168	172	149	161	122	137	197	207	133	133	277	291	241	253	141	163	140	140	89	93	100	100	1
Tran_05_17	Tranøybotn_2005	113	119	192	196	92	96	129	132	115	131	156	164	152	152	125	152	197	197	117	117	271	281	241	245	153	159	148	178	89	89	100	100	1
Tran_05_18	Tranøybotn_2005	111	141	192	192	96	100	132	132	117	145	176	192	158	164	134	140	209	209	117	117	263	279	241	245	131	151	136	136	89	89	100	104	1
Tran_05_19	Tranøybotn_2005	115	117	168	192	96	96	123	138	115	115	172	180	149	152	116	143	197	197	117	133	285	299	245	245	157	157	140	156	0	0	100	100	1
Tran_05_20	Tranøybotn_2005	105	141	192	192	92	100	126	126	115	119	160	184	149	170	122	149	197	197	133	133	283	285	241	241	157	165	136	178	89	89	100	100	1
Tran_05_21	Tranøybotn_2005	107	107	192	192	96	96	0	0	115	115	128	176	152	176	116	155	197	197	133	133	275	281	241	241	141	159	160	188	0	0	100	100	1
Tran_05_22	Tranøybotn_2005	105	109	192	192	92	96	129	132	121	135	144	196	158	164	125	143	197	197	117	117	273	289	241	245	155	157	138	184	0	0	100	100	1
Tran_05_23	Tranøybotn_2005	113	113	192	192	96	96	135	135	115	115	164	164	146	164	122	134	197	205	117	133	297	323	249	249	157	159	190	200	85	89	100	100	1
Tran_05_24	Tranøybotn_2005	113	121	192	192	96	104	129	132	119	139	148	168	146	167	122	140	197	207	133	133	265	267	243	249	183	183	138	158	85	89	100	100	1
Tran_05_25	Tranøybotn_2005	113	119	192	192	92	92	132	132	115	129	128	188	149	164	134	134	197	197	117	133	267	271	243	247	147	157	134	188	89	93	100	100	1
Tran_05_26	Tranøybotn_2005	115	115	192	192	96	96	132	138	115	115	140	156	146	164	134	146	197	207	117	117	259	285	241	241	139	149	134	176	85	89	100	104	1
Tran_05_27	Tranøybotn_2005	109	111	192	192	96	96	132	135	115	159	0	0	149	152	137	146	205	217	117	133	265	285	241	245	145	173	140	186	0	0	100	104	1
Tran_05_28	Tranøybotn_2005	119	119	192	192	96	104	126	138	115	119	156	180	152	155	116	116	207	207	117	117	285	313	241	249	147	153	168	190	89	93	100	104	1
Tran_05_29	Tranøybotn_2005	105	109	192	192	92	96	126	129	115	115	184	200	149	155	122	140	197	197	133	133	271	319	239	241	133	153	134	176	85	93	100	104	1
Tran_05_30	Tranøybotn_2005	113	113	192	192	96	96	126	129	115	137	164	176	143	155	146	146	197	197	133	133	257	265	239	239	155	163	138	158	85	93	100	100	1
Tran_05_31	Tranøybotn_2005	107	111	188	192	96	100	126	129	115	145	0	0	155	167	116	155	197	197	133	133	285	295	239	239	151	183	136	136	0	0	100	100	1
Tran_05_32	Tranøybotn_2005	113	141	192	192	96	96	126	138	115	143	0	0	146	158	137	158	197	197	117	133	281	287	239	245	159	163	134	176	81	89	100	100	1
Tran_05_33	Tranøybotn_2005	105	113	192	192	96	104	126	141	137	137	168	184	161	164	122	134	197	197	133	133	275	281	245	245	141	169	140	162	89	89	100	104	1
Tran_05_34	Tranøybotn_2005	107	107	192	192	96	112	129	135	115	119	156	188	146	149	134	158	205	211	117	133	285	339	245	247	131	159	184	192	93	93	100	104	1
Tran_05_37	Tranøybotn_2005	113	115	192	192	96	96	126	135	115	123	156	160	155	158	122	143	197	197	117	133	257	295	241	241	141	139	140	170	0	0	100	100	1
Tran_05_38	Tranøybotn_2005	119	121	192	192	96	96	126	132	115	115	192	208	155	176	122	125	197	206	117	117	275	291	239	241	161	169	140	180	89	93	104	104	1
Tran_05_40	Tranøybotn_2005	109	113	192	192	96	100	123	129	115	139	172	180	149	152	125	125	197	197	117	117	301	321	245	247	141	161	144	176	93	93	100	100	1
Tran_05_41	Tranøybotn_2005	111	115	192	192	96	100	129	129	115	139	176	188	146	158	125	146	197	197	117	117	303	369	245	247	157	175	144	190	89	89	100	104	1
Tran_05_42	Tranøybotn_2005	111	115	192	192	96	96	126	126	137	139	188	192	146	164	116	149	197	197	133	133	271	285	243	243	163	169	138	196	89	89	100	100	1
Tran_05_43	Tranøybotn_2005	109	123	192	192	96	104	126	129	115	123	176	196	164	167	122	125	197	209	117	117	269	271	241	247	139	161	142	144	85	85	100	104	1
Tran_05_44	Tranøybotn_2005	113	113	192	192	96	96	129	135	137	143	172	172	155	173	140	158	197	197	117	117	275	291	241	245	147	165	172	180	89	89	100	104	1
Tran_05_45	Tranøybotn_2005	107	121	192	192	96	96	0	0	115	145	144	144	149	152	122	140	197	211	117	117	255	283	239	241	149	151	134	136	0	0	100	104	1
Tran_05_46	Tranøybotn_2005	111	113	184	192	96	96	129	132	115	119	168	192	152	176	122	152	197	211	117	133	271	275	243	245	139	163	156	160	0	0	100	100	1
Tran_05_47	Tranøybotn_2005	109	109	192	192	96	96	129	138	121	137	148	164	149	152	122	158	197	211	117	117	263	283	0	0	137	147	134	144	85	89	100	100	1
Tran_05_48	Tranøybotn_2005	105	131	192	192	96	96	123	129	115	115	168	168	152	164	125	125	197	209	117	133	279	321	241	245	137	147	136	180	0	0	100	104	1
Tran_05_49	Tranøybotn_2005	109	119	192	192	96	96	123	126	115	139	156	180	152	155	122	122	197	205	117	133	251	285	243	247	151	157	144	174	85	89	100	100	1
Tran_05_50	Tranøybotn_2005	107	113	0	0	96	96	129	132	0	0	168	200	158	158	122	122	205	209	133	133	291	293	241	245	141	157	138	180	85	85	100	100	1
Tran_05_51	Tranøybotn_2005	105	111	192	192	96	100	135	141	115	139	164	180	164	167	122	122	205	211	117	133	275	289	239	247	157	163	0	0	0	0	100	100	1
Tran_05_52	Tranøybotn_2005	113	113	192	192	96	100	126	138	119	119	184	192	146	149	122	137	197	205	117	133	285	321	245	245	143	157	134	178	85	93	100	104	1
Tran_05_53	Tranøybotn_2005	107	107	188	192	96	112	132	138	137	141	156	188	149	161	122	143	207	207	117	133	269	299	245	245	155	163	140	172	81	81	100	100	1
Tran_05_54	Tranøybotn_2005	107	119	192	192	96	96	126	135	0	0	180	200	164	170	122	140	197	197	117	117	277	327	239	249	173	181	138	144	89	89	100	104	1
Tran_05_55	Tranøybotn_2005	119	119	192	192	92	92	132	135	143	145	160	200	146	155	116	146	197	211	133	133	271	287	241	245	141	145	172	190	89	89	100	100	1
Tran_05_56	Tranøybotn_2005	107	109	192	192	96	104	126	132	115	123	200	200	152	164	128	146	197	205	117	117	269	269	241	241	147	167	144	144	89	93	100	100	1
Tran_05_57	Tranøybotn_2005	109	111	192	192	88	88	126	138	117	125	128	200	158	176	140	158	197	197	117	133	263	263	241	243	155	157	134	140	93	93	100	100	1
Tran_05_58	Tranøybotn_2005	107	107	192	196	96	96	126	138	115	115	188	204	158	164	143	146	197	197	117	133	283	347	239	241	141	147	180	190	89	89	100	104	1
Tran_05_59	Tranøybotn_2005	109	111	192	192	96	104	126	135	115	119	192	200	155	161	125	161	197	205	133	133	265	273	245	245	147	163	144	170	93	93	104	104	1
Tran_05_60	Tranøybotn_2005	111	121	192	192	96	108	123	141	125	135	192	196	161	170	116	164	209	209	133	133	277	279	241	245	131	159	178	184	89	89	100	100	1
Tran_05_61	Tranøybotn_2005	109	115	192	192	96	100	129	138	121	137	160	164	146	152	122	152	209	209	117	133	283	291	245	245	159	163	156	178	85	93	100	100	1
Tran_05_62	Tranøybotn_2005	107	131	192	192	100	100	135	141	137	143	180	196	152	176	122	125	197	197	133	133	267	289	247	247	135	151	134	136	85	89	100	100	1
Tran_05_63	Tranøybotn_2005	113	145	192	192	92	104	129	129	115	115	168	168	146	161	128	152	197	209	133	133	251	283	239	245	141	161	144	144	89	89	100	100	1
Tran_05_64	Tranøybotn_2005	107	113	192	196	96	96	135	141	115	119	0	0	149	152	122	137	215	215	117	133	265	297	249	249	157	163	140	148	0	0	100	100	1
Tran_05_66	Tranøybotn_2005	111	113	192	192	96	96	129	135	131	147	156	156	149	164	125	128	197	213	133	133	267	275	241	257	141	169	134	182	85	85	100	100	1
Tran_05_68	Tranøybotn_2005	113	113	192	196	96	96	129	135	115	137	168	216	152	152	125	137	205	205	117	133	297	337	245	245	157	163	134	136	85	89	100	100	1
Tran_05_69	Tranøybotn_2005	107	111	184	192	92	96	132	135	133	155	180	180	152	155	116	122	197	205	133	133	251	253	245	245	135	153	134	176	89	93	100	100	1
Tran_05_70	Tranøybotn_2005	113	115	192	192	92	96	123	141	119	133	172	196	152	161	122	137	197	213	133	133	0	0	0	0	0	0	136	136	89	89	100	100	1
Tran_05_71	Tranøybotn_2005	107	111	192	192	96	96	135	141	115	115	160	180	149	161	110	134	211	211	117	133	271	273	241	249	139	151	136	170	85	93	100	100	1
Tran_05_72	Tranøybotn_2005	109	119	192	192	96	96	132	141	125	135	184	196	152	152	122	125	197	205	117	133	265	265	241	241	141	157	136	140	85	89	100	100	1
Tran_05_73	Tranøybotn_2005	109	113	192	192	96	96	126	129	115	119	184	184	155	158	131	140	197	197	117	133	293	321	245	245	169	169	182	182	93	93	100	104	1
Tran_05_74	Tranøybotn_2005	107	121	192	192	96	96	132	132	115	115	144	184	152	152	125	140	197	197	117	133	253	297	245	247	141	157	178	200	85	89	100	104	1
Tran_05_75	Tranøybotn_2005	0	0	192	196	92	100	132	132	131	137	160	184	149	170	125	146	197	197	117	117	267	323	239	249	149	169	142	194	89	89	100	100	1
Tran_05_76	Tranøybotn_2005	107	115	188	192	96	100	132	132	115	159	164	164	155	179	116	125	207	213	133	133	269	343	241	245	145	169	166	190	89	89	100	104	1
Tran_05_77	Tranøybotn_2005	115	119	192	192	96	100	132	135	115	135	0	0	152	158	140	146	207	207	117	133	255	273	241	241	141	173	134	134	89	89	100	100	1
Tran_05_78	Tranøybotn_2005	113	113	192	192	96	116	132	141	115	131	164	180	152	164	122	146	197	197	117	117	279	299	243	245	139	173	134	148	89	89	100	100	1
Tran_05_79	Tranøybotn_2005	107	107	192	192	92	96	132	135	119	137	172	180	152	158	152	158	197	207	133	133	287	291	239	239	157	173	134	134	85	89	100	104	1
Tran_05_80	Tranøybotn_2005	109	109	188	192	96	96	126	135	115	117	160	176	155	158	122	149	197	197	117	117	275	299	241	245	155	169	170	192	89	89	100	104	1
Tran_05_81	Tranøybotn_2005	105	109	192	192	96	96	129	132	115	137	176	196	155	161	122	125	207	215	133	133	271	287	241	245	141	167	134	180	89	89	100	100	1
Tran_05_82	Tranøybotn_2005	111	117	192	192	96	104	123	132	0	0	200	208	155	158	140	140	197	197	117	133	271	321	241	241	143	155	136	178	89	89	100	100	1
Tran_05_83	Tranøybotn_2005	107	113	192	192	92	96	126	132	115	115	164	172	170	173	134	161	207	215	133	133	293	329	243	245	145	169	134	186	85	89	100	104	1
Tran_05_84	Tranøybotn_2005	105	109	192	192	96	96	0	0	115	119	160	192	158	158	137	137	197	209	133	133	283	285	247	249	163	177	138	190	89	89	100	100	1
Tran_05_85	Tranøybotn_2005	107	119	192	192	96	100	0	0	115	121	0	0	146	155	137	137	197	197	117	133	255	295	245	249	155	159	134	152	0	0	100	100	1
Tran_05_86	Tranøybotn_2005	107	141	192	192	96	104	126	126	115	115	192	196	152	164	137	140	197	211	117	133	269	275	239	247	157	165	136	146	89	93	100	104	1
Tran_05_87	Tranøybotn_2005	117	121	192	192	96	100	132	132	115	117	172	180	149	155	122	146	197	197	117	133	265	285	239	245	141	161	136	184	85	97	100	100	1
Tran_05_88	Tranøybotn_2005	117	133	192	192	96	96	126	132	115	147	160	168	155	170	125	143	206	209	117	133	251	287	241	245	137	153	148	198	89	93	100	104	1
Tran_05_89	Tranøybotn_2005	105	117	192	192	96	96	0	0	0	0	172	184	146	152	149	149	197	197	117	133	261	297	245	245	141	159	134	136	93	93	100	100	1
Tran_05_90	Tranøybotn_2005	109	119	192	192	96	96	126	126	115	159	164	184	143	173	122	122	197	207	117	133	253	253	239	239	161	169	134	192	89	93	100	104	1
Tran_05_91	Tranøybotn_2005	107	119	192	192	100	108	129	138	119	151	180	188	152	167	122	149	197	205	117	133	257	285	239	241	139	157	134	194	93	93	100	104	1
Tran_05_92	Tranøybotn_2005	109	113	192	192	96	96	138	138	115	115	160	168	146	158	146	149	211	215	117	133	255	281	241	241	141	155	134	172	85	89	100	104	1
Tran_05_93	Tranøybotn_2005	109	111	192	192	96	100	132	141	115	125	0	0	149	155	128	140	197	197	117	133	281	305	239	245	137	149	142	196	0	0	100	104	1
Tran_05_94	Tranøybotn_2005	109	119	192	192	96	104	129	129	115	139	156	160	146	164	149	152	197	207	117	117	261	285	241	243	161	161	134	136	89	93	100	100	1
Tran_05_95	Tranøybotn_2005	113	131	192	192	96	104	120	123	135	137	140	160	152	158	134	137	197	209	117	133	263	271	241	241	131	131	172	192	85	89	100	100	1
Grat_05_01	Gratangen_2005	105	107	192	192	96	96	126	132	115	115	196	196	152	155	122	125	207	207	133	133	281	293	241	243	141	141	144	152	0	0	100	104	1
Grat_05_02	Gratangen_2005	107	113	192	196	96	96	129	135	115	127	168	192	149	170	116	152	197	211	117	133	261	279	239	243	157	161	134	188	0	0	100	100	1
Grat_05_03	Gratangen_2005	109	113	192	196	96	104	126	129	115	117	144	212	149	164	116	125	197	219	0	0	279	287	241	243	141	151	134	184	0	0	104	104	1
Grat_05_04	Gratangen_2005	109	115	192	192	92	96	126	141	115	115	176	204	146	161	122	146	197	215	133	133	267	291	241	241	141	155	134	194	0	0	100	100	1
Grat_05_05	Gratangen_2005	109	109	192	192	96	96	132	135	115	115	188	200	149	149	122	134	197	205	117	133	269	293	241	243	157	157	134	158	0	0	104	104	1
Grat_05_06	Gratangen_2005	105	113	192	192	96	96	126	135	115	115	164	164	146	149	131	143	197	197	117	133	263	291	241	241	145	157	0	0	0	0	100	104	1
Grat_05_07	Gratangen_2005	117	119	192	192	92	96	129	138	115	137	160	192	140	173	125	140	197	197	133	133	267	309	241	243	161	167	164	192	0	0	100	100	1
Grat_05_08	Gratangen_2005	107	109	184	188	96	96	129	135	115	119	148	208	146	149	137	149	205	207	117	133	269	287	245	245	145	163	0	0	0	0	100	104	1
Grat_05_09	Gratangen_2005	105	113	192	192	96	100	129	129	115	119	140	196	149	152	122	161	197	197	117	117	261	265	241	245	143	151	160	162	0	0	100	104	1
Grat_05_10	Gratangen_2005	113	133	192	192	96	96	126	135	115	147	164	172	143	158	125	128	197	197	133	133	285	289	243	245	159	171	140	188	0	0	100	104	1
Grat_05_12	Gratangen_2005	111	119	192	192	92	96	129	132	115	159	168	180	146	149	128	146	207	209	117	133	275	281	241	245	141	157	136	186	0	0	100	100	1
Grat_05_13	Gratangen_2005	107	115	192	192	96	100	123	135	115	115	196	196	146	155	122	122	211	213	117	117	291	297	241	245	0	0	140	186	0	0	100	100	1
Grat_05_15	Gratangen_2005	105	105	192	192	96	100	126	129	113	115	188	204	152	152	122	146	197	207	117	133	265	269	245	249	155	163	164	178	0	0	100	104	1
Grat_05_17	Gratangen_2005	111	141	192	192	96	100	126	129	115	137	180	180	158	173	137	140	197	197	117	117	269	281	245	245	141	157	142	178	0	0	100	104	1
Grat_05_21	Gratangen_2005	107	115	192	196	96	96	132	135	115	115	192	192	149	167	122	146	0	0	133	133	291	341	241	245	141	151	134	158	0	0	100	104	1
Grat_05_23	Gratangen_2005	109	115	192	192	84	96	126	126	125	143	156	164	158	167	155	158	197	211	133	133	235	267	245	245	169	173	194	204	0	0	100	104	2
Grat_05_24	Gratangen_2005	109	115	192	192	96	96	129	132	115	133	152	160	146	167	116	125	197	197	117	117	255	275	245	245	151	163	136	188	0	0	100	100	1
Grat_05_25	Gratangen_2005	107	109	192	192	96	96	132	138	115	119	180	188	146	155	116	122	197	209	117	117	281	313	241	245	163	169	144	176	0	0	100	100	1
Grat_05_26	Gratangen_2005	113	113	192	192	96	100	129	132	115	139	160	164	143	152	0	0	197	197	117	133	277	281	241	241	151	153	134	186	0	0	100	104	1
Grat_05_27	Gratangen_2005	111	141	192	192	96	112	123	126	115	143	184	184	149	170	116	122	197	197	117	117	281	299	243	245	141	169	172	180	0	0	100	100	1
Grat_05_28	Gratangen_2005	113	117	192	196	96	100	123	132	115	119	168	172	158	161	122	152	197	209	117	117	277	299	241	243	157	157	172	172	0	0	100	104	1
Grat_05_29	Gratangen_2005	113	119	192	192	96	96	126	129	139	141	192	192	143	152	143	146	197	205	117	133	287	291	239	239	141	163	178	196	0	0	100	100	1
Grat_05_31	Gratangen_2005	105	119	192	192	96	100	129	138	115	117	156	164	149	161	140	155	197	197	133	133	265	297	239	239	143	163	134	136	0	0	100	104	1
Grat_05_38	Gratangen_2005	113	141	192	192	96	96	126	129	115	115	172	172	146	152	122	140	197	197	117	117	283	309	239	239	163	169	132	138	0	0	100	100	1
Grat_05_40	Gratangen_2005	115	119	192	196	92	96	129	141	115	115	172	200	152	164	125	140	197	215	117	133	269	287	0	0	141	141	144	154	0	0	100	104	1
Grat_05_41	Gratangen_2005	111	113	184	192	96	96	135	138	115	131	160	188	146	161	116	158	197	205	117	133	287	297	0	0	153	157	136	172	0	0	100	100	1
Grat_05_42	Gratangen_2005	117	117	192	192	96	96	132	138	115	139	132	172	155	161	131	158	197	207	117	133	277	301	0	0	151	151	180	190	0	0	104	104	1
Grat_05_43	Gratangen_2005	109	113	192	196	96	96	126	129	125	139	168	204	146	149	125	128	197	197	117	133	279	293	241	241	151	173	188	192	0	0	100	100	1
Grat_05_45	Gratangen_2005	107	113	192	192	96	96	123	132	115	131	0	0	149	152	122	134	197	205	117	133	253	265	249	249	169	171	150	150	0	0	100	104	1
Grat_05_47	Gratangen_2005	107	109	192	192	96	96	129	129	115	115	164	168	161	170	122	152	197	197	117	117	275	289	241	241	141	165	134	136	0	0	104	104	1
Grat_05_48	Gratangen_2005	113	115	188	192	96	100	126	129	115	115	184	184	155	164	146	149	197	211	117	133	263	269	243	245	145	157	134	136	0	0	100	104	1
Grat_05_49	Gratangen_2005	107	113	192	192	96	96	129	141	115	115	176	184	152	155	122	149	197	197	117	117	283	283	239	245	141	169	134	144	0	0	100	104	1
Grat_05_50	Gratangen_2005	109	113	192	192	96	96	132	141	115	143	144	172	146	161	116	140	197	211	117	133	285	289	247	247	143	153	140	176	0	0	104	104	2
Grat_05_51	Gratangen_2005	109	121	192	192	96	100	126	132	115	157	176	200	152	152	116	122	207	209	117	133	269	269	243	245	137	141	134	180	0	0	100	100	1
Grat_05_53	Gratangen_2005	107	115	192	192	96	96	126	129	115	119	0	0	146	161	125	149	197	209	117	133	243	265	243	247	141	185	136	192	0	0	100	104	1
Grat_05_55	Gratangen_2005	113	113	192	192	96	100	126	126	115	139	160	160	152	167	143	143	197	211	117	117	263	341	245	245	159	161	140	172	0	0	100	104	1
Grat_05_56	Gratangen_2005	107	113	192	192	96	100	132	132	115	143	140	188	161	164	122	143	197	197	133	133	265	291	245	247	141	169	134	174	0	0	100	104	1
Grat_05_57	Gratangen_2005	107	113	192	192	96	96	123	138	115	143	176	192	152	155	116	122	197	209	133	133	281	283	241	249	135	163	142	182	0	0	100	100	1
Grat_05_58	Gratangen_2005	107	113	192	192	92	96	117	129	115	135	192	200	152	155	122	122	197	197	133	133	293	335	241	245	137	163	142	204	0	0	100	100	1
Grat_05_59	Gratangen_2005	105	113	192	192	92	96	123	132	117	119	184	188	149	161	140	149	197	197	133	133	277	289	241	241	151	157	136	180	0	0	100	104	1
Grat_05_63	Gratangen_2005	105	117	192	192	96	100	129	135	115	115	156	156	161	164	116	137	207	209	133	133	261	275	245	245	141	145	132	136	0	0	100	104	1
Grat_05_64	Gratangen_2005	109	109	192	192	96	104	129	141	115	115	156	156	158	161	122	158	197	207	133	133	283	283	239	245	155	157	138	140	0	0	100	104	1
Grat_05_65	Gratangen_2005	119	119	192	192	96	96	0	0	115	125	156	156	155	161	122	134	201	211	117	117	265	305	239	245	153	161	178	178	0	0	100	100	1
Grat_05_67	Gratangen_2005	107	107	192	192	96	96	126	138	115	115	164	188	161	164	140	146	197	197	117	133	275	289	241	245	157	173	136	140	0	0	104	104	1
Grat_05_68	Gratangen_2005	103	113	192	192	96	96	123	138	115	137	184	200	152	158	143	158	209	213	133	133	253	267	239	239	141	169	136	140	0	0	100	104	1
Grat_05_71	Gratangen_2005	109	121	192	192	96	100	126	135	115	137	156	180	151	158	116	146	197	207	117	133	285	291	241	241	157	161	152	188	0	0	100	104	1
Grat_05_72	Gratangen_2005	117	117	192	192	96	96	126	129	115	121	160	172	161	161	134	143	197	215	133	133	271	293	0	0	141	145	136	162	0	0	100	100	1
Grat_05_73	Gratangen_2005	117	119	192	192	96	104	126	129	115	119	156	156	155	164	116	116	197	215	117	133	257	285	241	243	141	151	144	182	0	0	100	104	1
Grat_05_75	Gratangen_2005	107	111	192	192	92	96	126	132	115	125	156	176	146	167	116	149	197	197	117	133	263	287	241	241	137	149	134	190	0	0	100	104	1
Grat_05_78	Gratangen_2005	109	113	192	192	92	96	126	132	115	115	180	200	152	152	116	122	197	205	133	133	277	289	249	249	149	149	136	180	0	0	100	104	1
Grat_05_79	Gratangen_2005	107	125	192	196	88	92	126	126	115	115	148	192	146	167	122	134	197	209	133	133	291	291	239	239	133	159	136	140	0	0	100	100	1
Grat_05_80	Gratangen_2005	105	111	192	206	92	96	135	138	119	129	188	188	140	164	122	140	197	209	117	133	275	297	241	241	141	155	134	176	0	0	100	100	1
Grat_05_81	Gratangen_2005	107	113	192	192	96	96	123	129	117	125	164	172	146	152	122	125	197	209	117	133	277	339	241	245	139	149	134	200	0	0	104	104	2
Grat_05_82	Gratangen_2005	107	115	192	192	96	100	135	138	117	117	176	180	152	158	122	158	197	209	117	133	265	277	243	243	143	157	136	166	0	0	100	100	1
Grat_05_84	Gratangen_2005	109	113	192	192	96	96	129	135	119	127	176	188	146	152	116	125	197	197	117	133	267	285	243	245	141	147	136	138	0	0	100	100	1
Grat_05_85	Gratangen_2005	107	111	192	196	96	96	126	141	125	159	156	176	167	176	110	149	197	211	117	117	269	279	241	245	151	159	170	188	0	0	100	100	1
Grat_05_86	Gratangen_2005	113	113	192	192	96	96	126	141	139	139	160	176	155	176	116	140	197	207	133	133	285	331	0	0	141	141	162	190	0	0	100	100	1
Grat_05_87	Gratangen_2005	119	119	192	192	92	96	126	135	119	141	156	208	155	170	122	140	207	211	117	133	273	289	241	245	153	157	144	188	0	0	100	104	1
Grat_05_88	Gratangen_2005	105	105	192	192	96	96	126	129	115	139	164	200	149	161	125	137	197	197	133	133	283	289	241	243	169	169	136	184	0	0	100	100	1
Grat_05_91	Gratangen_2005	107	107	192	192	96	96	132	138	115	135	176	176	158	158	149	158	207	213	133	133	275	293	239	241	145	157	134	184	0	0	100	104	1
Grat_05_92	Gratangen_2005	107	109	192	192	96	96	126	132	115	115	184	184	152	161	122	140	197	197	117	133	253	267	243	249	153	169	138	160	0	0	100	104	1
Grat_05_93	Gratangen_2005	107	111	192	192	96	112	126	135	117	131	176	188	152	161	146	152	197	197	117	133	261	287	239	247	151	163	136	136	0	0	100	100	1
Grat_05_94	Gratangen_2005	107	121	192	192	96	96	126	129	147	151	164	188	155	179	116	116	197	207	133	133	277	293	241	243	143	163	136	176	0	0	100	104	1
Grat_06_01	Gratangen_2006	113	117	192	192	96	96	126	129	115	135	164	184	152	164	122	125	207	209	117	133	281	281	245	249	131	133	136	198	89	89	100	100	1
Grat_06_03	Gratangen_2006	109	111	192	196	96	96	132	132	115	143	176	196	155	179	116	155	206	206	117	133	273	277	241	241	159	163	132	136	93	93	100	100	1
Grat_06_04	Gratangen_2006	107	109	192	196	92	96	123	138	115	117	156	188	155	161	149	149	197	215	117	133	273	291	239	243	145	157	136	158	85	89	100	100	1
Grat_06_05	Gratangen_2006	109	115	192	192	92	96	132	138	115	139	180	204	152	155	122	125	197	211	117	133	285	305	239	241	141	141	186	194	85	93	100	100	1
Grat_06_06	Gratangen_2006	107	111	192	192	96	96	126	126	115	139	176	188	149	158	125	128	197	215	117	133	289	323	245	249	143	157	144	176	89	89	100	104	2
Grat_06_07	Gratangen_2006	109	135	192	192	96	96	135	135	115	143	156	204	149	167	125	140	215	215	133	133	257	281	243	243	165	169	134	188	89	89	100	104	1
Grat_06_08	Gratangen_2006	107	119	192	192	92	96	129	138	115	165	172	208	152	173	122	158	207	211	117	133	291	313	245	245	165	173	154	190	85	89	100	104	1
Grat_06_09	Gratangen_2006	113	119	192	192	92	96	123	141	115	141	180	196	149	158	140	146	207	207	117	133	275	283	241	243	141	159	138	192	89	89	100	100	1
Grat_06_10	Gratangen_2006	113	119	192	192	96	108	123	144	115	137	176	184	143	149	122	146	197	197	117	133	253	273	239	241	149	149	144	192	85	89	100	104	1
Grat_06_11	Gratangen_2006	105	109	192	192	96	96	138	138	115	141	152	180	149	155	146	158	197	213	117	133	277	279	245	245	137	151	182	184	89	89	100	104	2
Grat_06_12	Gratangen_2006	109	117	192	192	96	100	138	138	117	117	172	196	146	155	140	143	197	205	133	133	293	297	241	245	141	145	142	142	89	89	100	104	1
Grat_06_14	Gratangen_2006	107	107	192	192	96	96	129	135	115	139	168	176	146	155	143	149	197	211	117	117	265	317	247	253	141	149	134	198	93	93	104	104	2
Grat_06_15	Gratangen_2006	113	125	192	192	92	96	126	129	113	113	172	184	152	158	125	146	197	197	117	133	263	279	245	247	145	161	144	214	89	89	100	104	1
Grat_06_16	Gratangen_2006	107	133	192	192	92	96	135	138	115	115	148	192	155	158	125	146	205	209	0	0	271	285	0	0	153	161	142	168	85	93	100	104	1
Grat_06_19	Gratangen_2006	105	133	192	192	92	96	123	132	115	115	192	200	143	152	128	128	207	221	117	133	261	261	245	247	149	163	136	144	93	93	100	104	1
Grat_06_20	Gratangen_2006	107	107	192	192	96	96	129	138	115	115	192	192	149	152	116	122	197	211	133	133	287	303	243	245	161	161	136	136	93	93	100	100	1
Grat_06_21	Gratangen_2006	109	113	192	192	96	96	123	135	117	125	184	196	158	167	122	122	197	207	117	133	287	289	241	241	157	169	134	142	93	97	100	100	1
Grat_06_23	Gratangen_2006	107	111	192	196	96	96	135	135	115	137	168	176	152	158	110	143	197	207	0	0	263	275	245	245	151	179	186	190	89	89	100	100	1
Grat_06_24	Gratangen_2006	107	109	188	192	96	96	135	141	135	137	160	176	161	173	146	158	197	205	117	117	265	289	243	249	141	163	134	196	0	0	100	100	1
Grat_06_25	Gratangen_2006	105	119	192	192	96	96	126	135	113	115	176	200	146	152	122	122	197	211	133	133	291	297	241	245	153	163	188	200	89	89	100	104	1
Grat_06_26	Gratangen_2006	109	113	192	192	96	96	132	132	115	115	172	196	149	161	122	149	197	199	133	133	261	333	239	241	141	153	144	202	93	93	100	104	1
Grat_06_30	Gratangen_2006	109	117	192	192	92	100	126	129	115	135	160	160	161	164	140	143	197	197	117	117	0	0	243	245	137	153	134	184	89	93	100	100	1
Grat_06_31	Gratangen_2006	105	129	192	192	96	96	126	138	115	115	172	192	158	176	116	140	197	197	133	133	293	295	241	243	147	153	136	146	89	89	104	104	1
Grat_06_32	Gratangen_2006	107	111	192	192	100	112	126	132	115	137	164	172	158	167	125	158	207	209	133	133	269	281	243	245	145	163	144	204	89	93	100	100	1
Grat_06_33	Gratangen_2006	105	105	192	192	96	96	126	135	115	153	156	168	155	161	128	158	181	197	117	133	287	355	241	241	141	141	186	198	89	89	100	100	1
Grat_06_34	Gratangen_2006	107	107	192	192	96	96	126	150	117	117	196	196	161	164	143	152	206	206	117	133	287	289	245	245	141	151	138	138	89	89	100	100	1
Grat_06_35	Gratangen_2006	109	113	192	192	96	96	123	135	115	143	128	188	143	164	137	140	197	211	117	117	267	269	239	249	133	159	152	208	81	85	100	100	1
Grat_06_37	Gratangen_2006	109	111	192	192	96	96	129	138	115	115	172	172	146	152	122	146	197	199	117	133	271	289	241	241	149	159	134	136	93	93	100	104	1
Grat_06_39	Gratangen_2006	119	121	192	192	92	96	126	126	121	131	176	204	143	155	122	143	203	207	133	133	319	335	241	243	157	163	186	192	89	93	100	100	1
Grat_06_40	Gratangen_2006	113	127	192	192	92	96	126	135	115	137	160	188	152	158	116	116	207	207	133	133	283	293	245	245	133	173	140	186	89	89	100	104	1
Grat_06_41	Gratangen_2006	107	113	192	192	96	96	129	129	115	121	164	184	149	164	116	155	197	197	133	133	283	285	239	245	155	167	138	144	89	89	100	100	1
Grat_06_42	Gratangen_2006	113	115	160	192	96	96	129	132	115	123	200	204	146	158	116	149	205	213	133	133	263	271	241	243	141	157	138	162	0	0	104	104	1
Grat_06_44	Gratangen_2006	115	129	196	196	96	112	117	132	123	139	164	168	170	170	122	122	197	197	117	133	291	303	243	243	139	169	176	190	85	89	100	100	1
Grat_06_45	Gratangen_2006	107	113	192	192	96	100	129	135	117	145	168	196	152	164	152	155	197	211	133	133	263	285	241	245	141	161	144	196	85	93	100	100	1
Grat_06_46	Gratangen_2006	113	121	192	192	96	100	132	132	115	115	140	200	155	161	122	125	197	197	117	117	267	273	239	249	137	171	134	146	89	93	100	104	1
Grat_06_47	Gratangen_2006	113	123	184	192	96	96	135	138	135	145	156	176	146	167	116	122	205	209	117	133	279	283	241	241	145	147	190	192	0	0	100	100	1
Grat_06_48	Gratangen_2006	107	107	160	192	96	96	126	135	115	115	184	192	152	152	116	152	197	205	117	133	273	275	243	245	141	151	138	138	85	89	100	104	1
Grat_06_49	Gratangen_2006	107	141	192	192	96	100	129	132	115	145	128	168	149	152	131	146	197	207	133	133	289	293	239	247	157	161	136	200	85	89	100	100	1
Grat_06_50	Gratangen_2006	109	109	192	196	96	96	129	135	115	141	168	168	152	164	146	152	201	201	0	0	263	269	243	255	171	171	138	162	89	89	100	100	1
Grat_06_51	Gratangen_2006	107	119	192	192	96	96	126	132	119	137	156	164	140	149	116	125	209	215	117	133	261	333	241	245	155	173	138	200	85	89	100	104	2
Grat_06_52	Gratangen_2006	107	143	192	192	96	96	129	138	115	115	172	188	155	167	116	167	197	211	117	133	271	271	241	249	141	159	162	188	0	0	104	104	2
Grat_06_55	Gratangen_2006	107	121	192	192	96	96	0	0	115	147	0	0	161	161	122	149	197	197	117	133	279	289	249	249	133	163	134	134	85	89	100	100	1
Grat_06_57	Gratangen_2006	113	113	192	192	92	96	132	138	113	113	128	172	155	161	125	158	205	209	117	133	259	269	241	243	141	165	138	140	89	93	100	100	1
Grat_06_58	Gratangen_2006	109	111	192	192	96	108	135	135	115	125	172	172	152	161	122	152	197	207	133	133	275	275	241	245	141	165	158	206	93	93	100	104	1
Grat_06_59	Gratangen_2006	107	107	192	192	96	96	129	138	117	117	160	200	155	167	116	125	207	211	133	133	293	295	241	251	133	163	134	178	89	89	100	104	1
Grat_06_61	Gratangen_2006	107	119	192	192	96	96	129	138	115	115	180	192	152	170	116	122	197	197	117	133	0	0	241	245	153	163	134	174	89	89	100	100	1
Grat_06_62	Gratangen_2006	107	109	192	192	96	96	126	126	0	0	172	192	161	161	134	149	201	207	133	133	271	297	241	243	157	169	138	204	89	97	104	104	1
Grat_06_63	Gratangen_2006	113	113	192	192	96	96	126	132	115	125	192	200	155	161	122	152	197	209	117	133	265	275	249	249	147	153	134	172	85	89	100	100	2
Grat_06_64	Gratangen_2006	109	141	192	192	92	112	126	129	137	145	172	192	155	170	125	149	205	207	117	133	249	273	241	241	155	167	134	186	89	89	100	100	1
Grat_06_65	Gratangen_2006	107	113	192	192	96	96	126	126	113	123	172	196	143	161	128	137	197	197	117	117	295	297	241	241	137	173	134	138	89	89	104	104	1
Grat_06_67	Gratangen_2006	111	111	192	192	92	96	123	132	115	137	188	196	149	155	122	122	197	207	117	133	287	293	241	241	139	155	138	182	85	93	100	100	1
Grat_06_69	Gratangen_2006	109	121	192	196	96	108	126	135	115	145	156	168	149	161	116	152	197	197	117	133	265	303	241	241	133	149	132	190	89	89	100	104	1
Grat_06_70	Gratangen_2006	109	109	192	192	96	96	129	132	115	115	176	180	149	152	122	161	197	197	117	117	233	279	243	249	159	161	158	190	85	89	100	104	1
Grat_06_71	Gratangen_2006	119	119	192	192	96	96	123	126	115	115	180	180	158	161	125	149	207	207	117	133	263	339	241	245	141	169	132	146	89	93	104	104	1
Grat_06_72	Gratangen_2006	109	141	192	192	96	100	135	135	115	159	184	208	152	161	122	137	197	197	133	133	271	311	241	245	133	161	136	144	85	93	100	104	1
Grat_06_73	Gratangen_2006	109	109	192	192	96	100	126	129	0	0	176	176	149	170	143	146	197	207	117	117	269	285	247	247	131	173	176	186	89	89	100	100	1
Grat_06_74	Gratangen_2006	115	119	192	192	96	100	129	132	115	115	160	192	149	164	116	128	207	215	117	133	269	299	241	241	159	159	188	196	89	89	100	100	1
Grat_06_75	Gratangen_2006	113	117	192	192	96	96	0	0	139	145	168	168	149	152	128	158	197	197	133	133	297	313	243	249	157	173	182	196	81	93	100	100	1
Grat_06_76	Gratangen_2006	107	121	192	192	92	96	126	135	115	119	148	168	164	164	116	140	197	197	117	117	269	315	245	245	141	157	130	138	89	89	100	100	1
Grat_06_77	Gratangen_2006	111	113	192	192	96	100	126	129	113	113	164	196	149	164	134	137	211	211	117	117	261	301	241	241	141	153	140	182	93	93	100	104	1
Grat_06_79	Gratangen_2006	115	115	192	192	96	100	126	126	0	0	160	204	152	173	140	146	197	211	117	133	251	265	241	245	141	163	134	204	89	93	100	100	1
Grat_06_80	Gratangen_2006	109	113	192	192	96	96	126	132	115	145	152	152	152	158	116	137	197	211	117	133	257	277	249	249	141	167	138	176	89	93	100	100	1
Eids_04_02	Eidsfjord_2004	109	141	192	192	92	100	129	138	115	121	184	212	146	152	116	140	197	207	117	117	259	269	241	249	141	145	136	140	89	89	100	100	1
Eids_04_03	Eidsfjord_2004	107	111	192	192	96	96	126	126	115	135	164	204	155	173	116	143	197	197	133	133	305	305	241	245	141	151	138	196	89	89	100	104	2
Eids_04_04	Eidsfjord_2004	113	113	192	192	92	96	129	135	137	145	164	192	155	167	152	158	207	207	133	133	0	0	241	247	143	165	172	178	89	89	100	100	1
Eids_04_05	Eidsfjord_2004	107	113	192	196	96	96	123	126	115	115	180	188	152	152	122	149	197	205	117	133	283	283	241	241	157	157	136	136	89	89	104	104	1
Eids_04_06	Eidsfjord_2004	107	119	192	196	96	96	126	129	115	137	156	172	152	164	122	149	197	197	133	133	259	291	241	241	145	163	134	140	85	89	100	100	2
Eids_04_07	Eidsfjord_2004	111	113	184	192	96	112	129	135	115	143	164	200	158	161	122	140	197	209	117	117	261	265	241	243	141	143	140	184	89	89	100	100	1
Eids_04_08	Eidsfjord_2004	113	119	192	192	96	100	138	141	115	133	176	192	152	158	143	152	197	197	133	133	0	0	241	243	141	141	138	178	89	89	100	104	1
Eids_04_09	Eidsfjord_2004	107	111	192	192	96	96	126	126	115	115	148	156	158	164	122	146	0	0	117	133	0	0	0	0	141	157	136	136	89	89	100	100	2
Eids_04_10	Eidsfjord_2004	107	113	184	192	92	96	126	126	115	115	156	168	152	161	116	134	205	207	117	133	277	277	239	249	137	159	134	178	89	89	100	104	1
Eids_04_11	Eidsfjord_2004	107	119	192	192	96	100	123	132	115	121	164	188	146	155	116	122	197	209	117	133	255	295	241	241	139	161	136	158	89	93	100	104	1
Eids_04_12	Eidsfjord_2004	105	109	188	192	96	96	132	141	115	143	160	184	161	170	116	137	197	205	133	133	253	267	239	243	141	157	172	202	89	89	100	104	1
Eids_04_14	Eidsfjord_2004	105	117	192	192	96	96	132	138	115	115	160	180	152	155	122	143	197	207	117	117	281	285	239	243	149	163	138	148	89	89	104	104	3
Eids_04_15	Eidsfjord_2004	105	113	192	192	96	100	126	138	115	155	180	184	149	158	116	125	197	209	133	133	265	265	241	243	157	169	178	188	89	89	100	100	1
Eids_04_16	Eidsfjord_2004	113	113	192	192	96	96	123	129	119	121	172	200	161	167	125	149	197	211	133	133	271	271	241	241	141	141	142	184	89	93	104	104	2
Eids_04_17	Eidsfjord_2004	107	117	192	192	96	96	129	141	125	135	156	164	158	167	122	125	197	207	117	133	281	281	239	241	149	157	134	172	89	89	100	104	2
Eids_04_18	Eidsfjord_2004	115	119	196	196	96	100	132	135	115	121	168	188	149	161	122	143	197	211	117	133	289	291	241	241	153	173	148	148	85	93	100	104	1
Eids_04_19	Eidsfjord_2004	107	121	192	192	96	96	126	135	115	119	160	192	158	161	122	143	207	207	117	133	265	265	241	245	145	169	134	134	89	93	100	100	1
Eids_04_21	Eidsfjord_2004	105	111	188	192	92	96	138	138	115	115	172	172	146	155	146	146	197	197	117	133	285	295	241	247	141	157	140	150	85	93	100	100	1
Eids_04_22	Eidsfjord_2004	115	141	184	192	96	100	126	132	115	115	160	192	155	173	116	125	197	207	117	133	243	271	245	245	141	149	134	158	85	85	100	104	1
Eids_04_23	Eidsfjord_2004	109	109	192	192	96	96	126	126	121	123	164	172	146	152	122	146	197	209	117	133	277	293	239	247	141	161	136	178	93	93	100	104	1
Eids_04_24	Eidsfjord_2004	107	109	192	192	96	112	126	135	115	135	164	184	152	158	125	146	197	207	117	133	259	259	241	241	141	145	138	142	85	85	100	104	2
Eids_04_25	Eidsfjord_2004	107	109	192	192	96	108	126	138	135	139	164	180	149	167	122	122	197	197	117	133	257	275	239	241	141	157	136	168	89	93	100	100	1
Eids_04_26	Eidsfjord_2004	107	111	192	192	96	96	132	132	115	115	128	168	152	155	116	140	197	201	117	133	273	281	241	243	145	145	134	162	89	93	100	100	1
Eids_04_27	Eidsfjord_2004	117	119	192	192	84	100	126	138	115	117	156	184	149	152	140	146	211	211	133	133	0	0	241	241	141	143	136	136	85	85	100	100	1
Eids_04_28	Eidsfjord_2004	107	119	192	192	96	100	135	135	115	117	160	160	146	146	140	146	199	207	117	133	287	289	0	0	141	153	134	136	85	89	100	100	1
Eids_04_29	Eidsfjord_2004	105	109	192	192	96	100	138	141	107	135	188	196	155	155	128	140	197	205	117	117	293	323	241	241	141	147	158	192	89	93	100	104	1
Eids_04_30	Eidsfjord_2004	111	113	188	192	96	96	135	141	115	121	196	200	149	152	128	134	197	211	133	133	255	255	245	247	157	157	140	194	89	89	100	104	1
Eids_04_31	Eidsfjord_2004	111	111	192	192	96	96	132	141	115	133	172	184	149	149	122	140	197	211	133	133	259	267	241	241	143	151	134	176	89	93	100	104	1
Eids_04_32	Eidsfjord_2004	119	121	184	192	92	100	123	135	119	151	156	176	149	158	128	140	197	207	0	0	253	253	241	241	169	177	138	172	93	93	100	100	1
Eids_04_33	Eidsfjord_2004	113	117	192	192	92	96	135	141	115	135	160	196	152	152	116	122	207	209	117	117	285	285	241	245	161	161	134	134	89	89	100	100	1
Eids_04_34	Eidsfjord_2004	107	109	192	192	88	96	123	129	115	115	188	196	158	158	116	122	197	207	117	117	0	0	247	247	141	165	132	136	89	93	104	104	1
Eids_04_38	Eidsfjord_2004	107	115	192	192	96	100	135	138	119	135	156	172	155	164	122	122	197	207	133	133	263	271	243	247	163	163	134	168	89	93	100	104	2
Eids_04_39	Eidsfjord_2004	107	113	192	192	96	96	123	132	115	115	156	176	149	152	122	125	197	213	133	133	259	297	239	241	141	155	136	144	89	89	100	104	2
Eids_04_41	Eidsfjord_2004	107	141	192	196	96	100	129	138	119	145	172	196	149	155	122	122	211	211	117	117	0	0	241	245	147	183	134	144	85	89	100	100	1
Eids_04_42	Eidsfjord_2004	113	117	192	192	96	104	132	135	99	117	148	156	143	155	125	140	197	211	133	133	275	277	239	247	147	147	138	148	85	89	100	100	1
Eids_04_44	Eidsfjord_2004	107	109	188	192	96	96	129	132	115	115	176	176	155	164	149	149	197	197	117	133	279	289	239	245	145	145	134	146	0	0	100	104	1
Eids_04_46	Eidsfjord_2004	115	119	184	192	92	104	123	132	115	151	160	160	149	161	125	125	197	205	133	133	263	279	239	253	155	157	162	184	85	85	100	100	1
Eids_04_49	Eidsfjord_2004	107	117	192	192	96	96	135	141	139	163	152	184	146	164	122	158	211	211	117	133	0	0	245	245	153	157	188	198	89	93	100	104	1
Eids_04_50	Eidsfjord_2004	105	117	192	192	96	96	126	132	115	115	156	180	164	170	113	146	197	207	133	133	0	0	241	243	161	167	134	138	89	93	100	104	1
Eids_04_52	Eidsfjord_2004	119	141	188	192	96	96	126	126	137	137	164	172	149	167	116	122	209	211	133	133	0	0	0	0	159	165	134	180	89	89	100	104	1
Eids_04_53	Eidsfjord_2004	105	111	192	192	92	112	123	132	115	145	188	192	155	155	116	146	207	207	133	133	265	265	243	247	147	173	134	182	89	93	100	100	1
Eids_04_54	Eidsfjord_2004	111	113	192	192	96	100	135	135	121	155	168	184	146	170	122	143	197	209	133	133	261	261	241	241	157	161	188	222	85	85	104	104	2
Eids_04_55	Eidsfjord_2004	107	107	192	192	92	96	126	132	115	143	180	180	149	164	140	152	197	205	117	133	261	261	245	249	149	155	138	162	85	89	100	100	1
Eids_04_56	Eidsfjord_2004	107	109	192	192	96	104	135	144	115	125	172	172	149	152	122	143	197	197	117	133	251	295	245	245	149	169	144	172	85	85	100	100	1
Eids_04_57	Eidsfjord_2004	107	109	192	192	92	96	123	135	115	141	172	192	146	152	122	146	197	207	117	133	287	291	247	249	151	157	178	186	89	89	100	104	2
Eids_04_58	Eidsfjord_2004	107	113	188	188	92	96	132	135	115	115	140	180	149	152	116	122	197	209	117	133	279	279	241	245	141	157	138	144	89	89	100	104	1
Eids_04_59	Eidsfjord_2004	107	111	188	192	96	96	126	135	115	115	160	168	155	155	116	143	197	197	117	133	285	287	241	249	151	161	136	180	89	89	104	104	2
Eids_04_60	Eidsfjord_2004	109	123	192	192	96	100	129	135	115	115	128	176	149	155	116	122	197	207	117	133	271	279	239	245	141	157	136	186	93	93	100	104	2
Eids_04_62	Eidsfjord_2004	107	111	192	192	96	100	129	138	121	149	176	192	146	149	134	152	197	205	133	133	0	0	0	0	151	159	0	0	89	89	100	104	1
Eids_04_63	Eidsfjord_2004	107	115	192	192	96	96	126	138	115	121	156	168	152	158	116	122	207	207	133	133	259	289	241	243	167	167	136	144	89	93	100	100	2
Eids_04_64	Eidsfjord_2004	111	119	192	192	0	0	129	138	115	145	164	204	155	167	116	158	197	207	117	133	269	289	239	239	133	153	140	172	89	89	100	100	1
Eids_04_65	Eidsfjord_2004	109	113	192	192	92	100	123	123	105	137	188	192	158	158	122	149	197	197	117	133	0	0	241	245	141	175	136	136	89	89	100	100	1
Eids_04_66	Eidsfjord_2004	113	119	192	192	96	96	126	132	115	125	200	204	146	152	116	149	207	209	117	133	293	293	243	245	159	169	166	186	89	93	100	100	1
Eids_04_67	Eidsfjord_2004	105	119	184	192	96	96	129	138	117	121	160	176	155	158	125	125	207	209	117	133	231	275	245	245	157	163	136	142	85	93	104	104	2
Eids_04_68	Eidsfjord_2004	107	109	192	192	96	100	132	138	125	139	140	172	152	155	146	152	197	197	117	133	261	289	241	241	141	151	176	184	89	89	100	100	1
Eids_04_70	Eidsfjord_2004	115	119	192	192	92	96	129	138	115	115	152	176	152	170	137	137	197	213	117	133	0	0	241	243	141	159	138	186	0	0	100	100	1
Eids_04_72	Eidsfjord_2004	107	113	192	192	96	100	126	132	115	137	164	184	155	164	125	128	197	197	117	133	273	293	239	243	157	157	156	194	85	85	100	100	1
Eids_04_73	Eidsfjord_2004	111	111	192	192	96	100	132	138	115	139	160	160	149	149	128	131	197	207	133	133	261	261	241	241	139	179	158	170	93	93	100	104	1
Eids_04_74	Eidsfjord_2004	109	113	192	192	92	96	126	129	115	117	156	180	158	158	122	134	197	197	117	133	275	283	241	243	151	155	140	160	89	89	100	104	1
Eids_04_75	Eidsfjord_2004	113	117	192	192	96	96	123	126	115	137	180	200	149	173	122	146	197	205	117	133	285	291	239	241	147	153	138	204	0	0	104	104	1
Eids_04_76	Eidsfjord_2004	107	111	192	192	92	96	126	129	115	139	188	220	155	155	116	125	197	209	117	117	259	291	241	243	143	145	130	182	89	89	100	100	1
Eids_04_77	Eidsfjord_2004	113	123	192	192	96	100	126	138	115	135	160	180	152	152	116	149	209	209	117	133	281	285	239	245	141	169	140	190	89	89	100	100	1
Eids_04_78	Eidsfjord_2004	107	107	192	196	96	104	123	132	115	161	184	188	149	173	110	116	197	197	133	133	279	279	241	249	149	169	136	174	89	93	100	104	1
Eids_04_79	Eidsfjord_2004	109	109	192	192	96	96	132	132	117	155	188	200	152	158	149	152	197	207	117	117	287	287	245	245	133	137	134	134	85	85	100	100	2
Eids_04_80	Eidsfjord_2004	109	113	180	192	92	96	123	129	123	147	172	184	155	161	116	116	197	197	129	133	267	271	241	261	153	153	178	194	81	93	100	100	1
Eids_04_81	Eidsfjord_2004	105	107	192	192	96	96	129	132	115	115	160	160	152	152	122	134	197	205	133	133	295	295	243	243	133	151	0	0	89	93	100	104	2
Eids_04_82	Eidsfjord_2004	109	111	192	192	96	96	123	135	115	145	176	192	149	164	116	122	197	197	117	133	259	289	241	247	157	159	136	176	85	89	100	100	1
Eids_04_83	Eidsfjord_2004	113	119	192	192	96	96	132	141	115	117	156	200	149	161	122	143	197	209	117	117	265	265	239	241	145	159	138	178	89	89	100	104	2
Eids_04_84	Eidsfjord_2004	107	129	192	192	96	96	132	141	141	145	156	172	155	155	140	149	197	197	117	133	0	0	241	241	159	159	178	186	89	89	100	100	1
Eids_04_85	Eidsfjord_2004	111	111	192	192	96	96	123	138	115	137	168	172	149	149	125	128	197	197	117	133	275	275	239	241	151	167	132	174	85	89	100	104	1
Eids_04_87	Eidsfjord_2004	113	113	192	192	96	96	132	132	115	137	172	192	152	164	116	143	197	197	117	117	255	255	239	239	141	169	134	160	85	85	100	100	1
Eids_04_89	Eidsfjord_2004	107	107	192	192	96	96	126	126	143	149	180	192	149	152	122	149	197	205	117	133	253	279	241	251	147	169	142	196	93	97	100	100	1
Eids_04_90	Eidsfjord_2004	107	109	192	192	96	96	129	135	115	135	156	180	161	167	122	140	205	211	117	117	277	277	243	243	141	145	132	174	85	93	100	100	1
Eids_04_91	Eidsfjord_2004	109	119	192	196	96	108	126	129	0	0	168	168	158	164	122	149	197	207	133	133	255	271	241	243	141	149	136	174	89	89	100	104	1
Eids_04_92	Eidsfjord_2004	105	119	192	192	100	104	126	132	115	137	192	200	146	152	143	158	205	211	133	133	253	259	241	245	151	151	134	198	89	89	100	100	1
Eids_04_93	Eidsfjord_2004	107	107	192	192	92	108	126	129	117	133	180	196	158	164	140	152	197	197	133	133	269	295	241	245	157	177	136	182	89	89	100	100	1
Eids_04_94	Eidsfjord_2004	107	113	192	192	96	100	126	135	135	139	168	196	146	152	110	116	0	0	117	133	263	277	241	249	141	149	190	190	89	93	100	100	1
Tyss_03_01	Tysfjord_2003	111	111	184	192	96	96	132	132	117	125	176	204	146	164	116	137	197	197	133	133	261	271	241	245	141	165	136	136	0	0	100	100	1
Tyss_03_02	Tysfjord_2003	109	119	192	192	92	96	126	138	115	115	144	184	155	161	122	122	197	197	117	133	271	287	245	247	159	159	134	154	0	0	100	100	1
Tyss_03_03	Tysfjord_2003	109	115	192	192	96	100	126	135	115	143	180	188	146	149	122	140	197	197	133	133	275	281	245	247	133	141	138	192	0	0	100	100	1
Tyss_03_04	Tysfjord_2003	113	119	192	192	92	96	123	129	115	121	160	172	152	155	122	152	197	209	117	133	259	259	241	251	141	173	132	134	0	0	100	104	1
Tyss_03_05	Tysfjord_2003	113	119	192	192	96	104	123	129	125	137	176	196	146	167	146	149	197	207	133	133	279	279	265	265	133	159	138	178	0	0	100	100	1
Tyss_03_06	Tysfjord_2003	107	109	192	192	96	100	126	126	0	0	176	188	152	173	122	125	197	197	117	133	273	293	245	245	141	165	138	192	0	0	100	100	1
Tyss_03_09	Tysfjord_2003	119	119	192	192	96	96	123	138	115	145	160	188	149	158	146	152	205	207	117	133	267	273	245	245	131	173	186	188	0	0	100	100	1
Tyss_03_10	Tysfjord_2003	107	107	192	192	0	0	0	0	119	119	156	204	146	152	122	128	207	207	117	117	287	295	241	245	157	173	140	144	0	0	100	100	2
Tyss_03_11	Tysfjord_2003	107	117	192	196	92	96	123	126	115	139	156	204	164	167	122	137	205	211	133	133	271	271	241	243	131	141	136	174	0	0	100	100	1
Tyss_03_12	Tysfjord_2003	107	109	192	192	96	96	123	126	115	115	140	156	152	164	122	140	197	207	117	133	267	267	245	247	133	163	134	144	0	0	100	104	1
Tyss_03_13	Tysfjord_2003	109	129	192	192	100	100	126	129	115	135	144	164	152	158	122	122	197	207	117	117	255	283	243	249	149	155	134	198	0	0	100	100	1
Tyss_03_15	Tysfjord_2003	113	119	192	192	92	96	126	132	115	137	144	160	152	170	116	128	197	211	117	133	279	287	247	249	149	169	136	182	0	0	100	100	1
Tyss_03_16	Tysfjord_2003	113	119	192	196	92	100	132	138	115	115	148	164	152	164	146	158	197	209	133	133	263	263	245	249	155	159	136	174	0	0	100	100	1
Tyss_03_17	Tysfjord_2003	113	115	192	192	96	96	132	135	115	151	180	180	146	146	140	152	197	209	117	133	289	289	241	241	145	151	134	190	0	0	100	100	1
Tyss_03_18	Tysfjord_2003	109	125	192	192	92	96	129	138	115	127	160	196	149	152	122	152	197	209	117	133	291	291	241	243	151	157	136	212	0	0	100	100	1
Tyss_03_19	Tysfjord_2003	107	115	192	192	92	96	126	138	115	137	128	156	149	161	110	149	197	197	117	133	253	281	243	245	0	0	136	196	0	0	100	104	1
Tyss_03_20	Tysfjord_2003	107	113	192	192	96	96	132	132	115	119	160	180	146	152	125	149	205	207	117	117	277	287	241	241	145	163	144	148	0	0	100	100	1
Tyss_03_21	Tysfjord_2003	107	115	188	192	96	96	126	138	115	115	124	176	149	158	122	146	211	211	117	133	263	271	239	245	159	161	136	146	0	0	100	100	1
Tyss_03_22	Tysfjord_2003	105	107	192	192	92	96	126	132	115	115	144	184	140	158	116	128	197	211	133	133	0	0	0	0	149	155	136	144	0	0	100	100	1
Tyss_03_23	Tysfjord_2003	117	119	192	192	100	100	129	129	125	139	128	168	170	173	122	134	197	215	117	133	277	281	245	249	159	169	136	174	0	0	100	104	1
Tyss_03_24	Tysfjord_2003	119	119	192	192	96	96	126	132	115	133	176	176	149	152	125	152	207	209	133	133	269	309	241	245	151	179	136	194	0	0	100	100	1
Tyss_03_25	Tysfjord_2003	111	113	192	192	96	100	126	132	117	135	160	188	155	161	122	140	197	205	117	133	257	267	243	245	159	175	158	192	0	0	100	104	1
Tyss_03_26	Tysfjord_2003	107	113	192	192	96	96	132	135	115	115	180	180	155	155	149	149	197	197	117	117	253	295	241	245	143	153	134	134	0	0	100	100	1
Tyss_03_27	Tysfjord_2003	107	123	192	192	96	100	126	132	115	119	160	196	158	167	149	158	197	197	117	133	265	285	241	241	141	153	134	144	0	0	100	100	1
Tyss_03_28	Tysfjord_2003	111	129	192	196	92	100	132	135	127	135	156	160	149	158	122	122	221	221	117	133	0	0	245	245	173	173	134	176	0	0	100	100	1
Tyss_03_29	Tysfjord_2003	111	119	192	192	96	100	126	129	109	119	156	156	149	149	125	146	197	207	133	133	273	275	245	245	157	159	134	144	0	0	100	104	1
Tyss_03_31	Tysfjord_2003	107	109	192	192	96	100	0	0	133	139	172	172	152	164	122	125	211	211	133	133	267	273	241	243	151	165	136	190	0	0	100	100	1
Tyss_03_32	Tysfjord_2003	113	113	184	192	92	104	129	138	115	115	164	184	158	173	116	146	197	197	117	133	271	273	241	241	167	169	136	140	0	0	100	100	1
Tyss_03_33	Tysfjord_2003	113	115	192	196	96	100	129	138	115	137	184	204	149	152	116	122	197	197	117	133	261	275	245	245	163	167	144	170	0	0	100	104	1
Tyss_03_34	Tysfjord_2003	105	113	192	192	96	100	129	138	115	117	160	172	152	155	110	116	197	197	117	133	257	283	245	247	141	155	138	144	0	0	100	100	1
Tyss_03_35	Tysfjord_2003	105	121	192	196	96	96	129	138	0	0	192	196	152	164	122	146	197	197	117	133	251	273	241	245	141	145	146	172	0	0	100	100	1
Tyss_03_36	Tysfjord_2003	107	107	184	192	96	96	126	126	115	115	180	180	152	152	122	125	197	197	117	117	269	293	239	245	157	159	158	204	0	0	100	100	1
Tyss_03_38	Tysfjord_2003	105	119	192	192	96	96	126	141	115	135	176	176	152	158	122	152	197	197	117	117	263	305	241	243	143	165	178	178	0	0	100	100	1
Tyss_03_39	Tysfjord_2003	107	119	192	192	92	100	132	141	119	125	172	188	155	158	125	146	197	215	117	117	271	271	247	249	143	155	142	172	0	0	100	100	1
Tyss_03_41	Tysfjord_2003	107	115	184	196	84	92	129	129	115	139	156	184	158	161	113	125	207	213	117	133	285	287	239	241	153	169	136	190	0	0	100	100	1
Tyss_03_42	Tysfjord_2003	109	111	192	192	100	112	0	0	143	145	172	180	152	164	122	155	197	197	117	117	277	291	239	239	149	169	186	190	0	0	100	100	1
Tyss_03_43	Tysfjord_2003	111	111	192	192	92	96	132	135	115	139	168	192	149	158	125	128	197	211	117	133	265	297	243	245	155	169	176	184	0	0	100	100	1
Tyss_03_44	Tysfjord_2003	113	141	192	192	100	104	129	129	115	135	192	192	164	167	125	140	207	207	117	133	279	279	243	243	149	149	186	206	0	0	100	100	2
Tyss_03_45	Tysfjord_2003	113	123	192	192	96	96	126	126	135	145	172	172	164	167	122	146	197	197	133	133	287	287	241	245	149	163	142	166	0	0	100	100	1
Tyss_03_46	Tysfjord_2003	109	131	192	192	96	96	132	141	115	121	176	192	146	173	152	152	197	197	133	133	263	263	243	245	133	163	136	156	0	0	100	104	1
Tyss_03_47	Tysfjord_2003	109	117	184	192	96	104	0	0	117	121	0	0	155	164	122	122	197	197	117	133	265	275	243	243	143	159	144	162	0	0	100	100	1
Tyss_03_48	Tysfjord_2003	105	107	192	192	96	112	132	135	115	115	192	200	152	155	116	122	197	213	117	133	279	279	241	249	157	157	136	136	0	0	100	100	2
Balkj_04_01	Baldkjosen_Nordfolda_2004	113	113	192	192	96	96	126	138	121	141	164	196	146	158	128	158	197	211	117	133	281	293	241	241	141	153	152	186	85	93	100	100	1
Balkj_04_02	Baldkjosen_Nordfolda_2004	129	141	192	192	96	96	126	129	131	135	156	180	149	161	116	137	197	197	117	133	283	285	241	241	157	159	180	190	0	0	100	104	1
Balkj_04_03	Baldkjosen_Nordfolda_2004	105	111	192	192	92	96	126	132	115	141	128	160	152	164	143	155	197	211	117	133	275	291	241	241	141	151	136	208	0	0	100	100	1
Balkj_04_04	Baldkjosen_Nordfolda_2004	107	119	184	192	96	104	132	141	115	131	164	192	149	158	122	122	197	207	117	133	283	299	241	241	163	169	136	174	0	0	100	100	1
Balkj_04_05	Baldkjosen_Nordfolda_2004	105	119	192	192	96	100	126	132	115	141	160	164	158	167	128	149	197	205	117	133	267	277	241	241	141	149	138	196	0	0	100	100	1
Balkj_04_06	Baldkjosen_Nordfolda_2004	107	107	192	192	100	100	123	132	125	145	144	164	158	161	116	122	197	201	117	133	267	293	249	249	143	163	134	194	85	85	100	100	1
Balkj_04_07	Baldkjosen_Nordfolda_2004	105	113	184	192	96	96	126	126	137	137	164	176	149	164	122	125	205	211	117	133	263	277	241	247	165	171	136	202	85	89	100	104	1
Balkj_04_08	Baldkjosen_Nordfolda_2004	109	113	192	192	96	96	126	126	115	115	160	164	143	149	146	146	197	197	117	133	277	305	241	245	137	153	154	156	89	93	100	104	2
Balkj_04_09	Baldkjosen_Nordfolda_2004	111	113	184	192	96	96	129	132	115	143	156	156	146	179	116	125	211	211	117	133	283	287	0	0	151	159	134	178	0	0	100	104	1
Balkj_04_10	Baldkjosen_Nordfolda_2004	113	119	192	192	92	96	129	135	115	135	164	200	158	170	122	122	205	207	133	133	287	297	243	249	141	151	144	194	0	0	100	100	1
Balkj_04_11	Baldkjosen_Nordfolda_2004	113	129	192	192	96	112	129	132	115	143	188	196	149	164	122	125	197	197	117	117	279	285	0	0	141	163	136	186	89	93	100	100	1
Balkj_04_12	Baldkjosen_Nordfolda_2004	105	105	192	196	96	104	138	138	115	141	144	204	152	155	122	140	197	207	117	117	271	285	245	245	149	153	136	192	85	89	100	100	1
Balkj_04_13	Baldkjosen_Nordfolda_2004	107	113	192	192	88	96	135	141	119	121	160	176	149	152	116	125	207	207	117	133	273	285	241	241	145	155	144	156	0	0	100	100	1
Balkj_04_14	Baldkjosen_Nordfolda_2004	109	113	192	192	96	104	129	135	125	139	140	196	146	149	122	152	197	207	133	133	277	285	245	245	151	157	190	198	89	93	100	100	1
Balkj_04_15	Baldkjosen_Nordfolda_2004	113	119	192	192	92	104	126	129	115	149	148	172	161	164	122	146	197	209	117	133	279	287	243	243	145	149	132	172	89	89	100	100	1
Balkj_04_16	Baldkjosen_Nordfolda_2004	111	123	192	196	96	96	126	135	115	115	164	176	146	155	128	149	197	211	117	133	275	293	241	241	153	171	144	168	0	0	100	100	1
Balkj_04_17	Baldkjosen_Nordfolda_2004	113	117	192	192	96	100	126	150	115	127	188	204	149	158	122	146	197	197	117	117	287	289	247	247	167	183	140	190	89	89	100	104	1
Balkj_04_18	Baldkjosen_Nordfolda_2004	105	109	192	192	84	100	126	132	115	127	172	180	149	155	122	146	197	205	117	133	271	277	245	247	141	161	136	144	85	93	100	100	1
Balkj_04_19	Baldkjosen_Nordfolda_2004	111	115	192	192	96	104	123	132	115	137	172	196	155	167	116	122	197	197	117	133	257	291	245	245	151	169	140	178	89	89	100	100	1
Balkj_04_20	Baldkjosen_Nordfolda_2004	105	107	192	192	96	100	129	129	125	143	160	164	152	167	116	143	197	197	133	133	293	345	241	241	145	165	178	184	89	93	100	100	1
Balkj_04_21	Baldkjosen_Nordfolda_2004	107	109	192	192	92	96	132	135	119	153	148	172	155	152	125	125	197	211	133	133	273	319	241	245	145	167	178	178	93	93	100	100	1
Balkj_04_22	Baldkjosen_Nordfolda_2004	111	111	188	192	92	96	129	135	115	127	184	204	149	152	116	158	197	197	117	133	269	275	239	245	153	159	134	190	85	85	100	100	1
Balkj_04_23	Baldkjosen_Nordfolda_2004	105	113	192	192	96	100	129	132	115	139	188	188	158	161	116	125	197	197	117	117	261	287	239	239	137	163	138	204	89	93	100	100	1
Balkj_04_24	Baldkjosen_Nordfolda_2004	107	117	192	192	96	96	123	129	115	135	176	184	149	161	122	146	197	206	117	133	265	273	245	245	139	163	148	190	89	89	100	100	1
Balkj_04_25	Baldkjosen_Nordfolda_2004	107	111	192	192	96	96	123	129	141	143	184	184	149	170	122	146	197	207	117	117	281	315	245	245	157	173	182	184	85	93	100	100	1
Balkj_04_26	Baldkjosen_Nordfolda_2004	105	115	192	196	96	96	126	132	115	135	188	204	149	158	125	125	197	209	117	133	267	287	241	245	149	163	156	174	85	85	100	104	1
Balkj_04_27	Baldkjosen_Nordfolda_2004	107	139	192	192	96	96	126	126	139	145	160	172	146	161	122	143	197	197	133	133	265	267	247	247	141	141	162	208	89	93	100	104	1
Balkj_04_28	Baldkjosen_Nordfolda_2004	113	119	192	192	92	96	126	129	115	125	156	196	155	158	122	125	197	197	117	133	273	295	245	249	151	163	136	188	85	85	100	100	1
Balkj_04_29	Baldkjosen_Nordfolda_2004	107	109	192	192	96	96	126	135	131	143	156	156	152	167	122	146	197	197	117	117	289	299	241	247	141	159	134	176	85	89	100	100	1
Balkj_04_30	Baldkjosen_Nordfolda_2004	107	113	192	192	96	96	126	132	119	123	152	176	152	161	134	146	191	211	133	133	277	285	241	241	139	157	136	154	89	93	100	104	1
Balkj_04_31	Baldkjosen_Nordfolda_2004	109	117	192	192	108	112	126	141	137	145	196	196	152	164	140	146	197	197	133	133	235	263	243	243	153	163	188	190	89	93	100	100	1
Balkj_04_33	Baldkjosen_Nordfolda_2004	105	113	192	192	92	96	129	138	121	133	164	164	152	158	122	161	207	211	133	133	271	279	239	247	157	169	136	144	89	89	100	100	1
Balkj_04_34	Baldkjosen_Nordfolda_2004	113	113	192	192	96	96	126	138	115	139	156	172	152	164	122	131	197	213	117	117	263	295	243	247	169	173	136	140	89	89	100	100	1
Balkj_04_35	Baldkjosen_Nordfolda_2004	107	109	192	192	88	96	126	138	115	133	156	196	149	158	116	143	197	207	117	117	259	289	243	245	141	153	136	142	0	0	100	104	1
Balkj_04_37	Baldkjosen_Nordfolda_2004	107	117	192	192	92	96	126	129	115	129	160	204	164	179	134	146	207	207	133	133	247	289	241	245	151	157	196	196	89	93	100	100	2
Balkj_04_38	Baldkjosen_Nordfolda_2004	119	121	192	196	100	112	126	141	131	133	180	184	161	170	122	140	197	197	117	117	255	263	241	247	135	141	140	162	89	89	100	100	1
Balkj_04_39	Baldkjosen_Nordfolda_2004	109	119	188	192	92	100	126	129	115	117	160	164	158	170	122	140	197	197	117	117	251	257	245	245	163	167	136	142	89	89	100	100	1
Balkj_04_40	Baldkjosen_Nordfolda_2004	107	113	192	192	92	96	129	135	115	115	164	196	152	155	131	143	197	207	117	133	271	291	241	241	141	141	152	190	89	89	100	104	1
Balkj_04_41	Baldkjosen_Nordfolda_2004	109	117	192	192	96	96	126	129	115	137	144	208	152	167	134	137	197	197	117	133	281	289	249	251	157	169	134	188	0	0	104	104	1
Balkj_04_42	Baldkjosen_Nordfolda_2004	105	105	192	192	96	112	135	141	115	137	128	184	158	161	140	152	197	209	117	133	289	331	241	245	141	157	140	150	93	93	100	100	1
Balkj_04_43	Baldkjosen_Nordfolda_2004	109	127	192	192	96	96	123	123	115	135	148	176	149	152	116	116	197	197	117	133	271	279	241	241	141	161	132	192	0	0	100	100	1
Balkj_04_44	Baldkjosen_Nordfolda_2004	113	119	192	192	96	96	132	138	139	141	144	176	149	152	116	161	203	207	117	133	285	311	241	241	153	159	134	138	85	85	100	100	1
Balkj_04_47	Baldkjosen_Nordfolda_2004	117	117	192	196	96	100	123	132	119	157	168	172	152	155	116	122	197	197	133	133	265	271	239	239	153	169	136	188	85	89	100	104	1
Balkj_04_48	Baldkjosen_Nordfolda_2004	105	119	192	192	84	96	129	129	131	137	152	160	149	164	125	143	197	209	117	117	269	275	239	241	151	159	180	188	0	0	100	100	1
Balkj_04_50	Baldkjosen_Nordfolda_2004	107	119	192	192	96	100	126	126	115	141	172	180	140	158	125	146	197	207	117	133	293	349	245	245	153	163	140	190	85	89	100	100	1
Balkj_04_51	Baldkjosen_Nordfolda_2004	113	119	192	192	92	100	126	132	115	115	156	172	149	152	122	122	211	215	0	0	261	269	239	245	149	153	136	178	89	93	100	100	1
Balkj_04_52	Baldkjosen_Nordfolda_2004	109	113	192	192	96	96	129	141	115	119	176	184	149	152	122	125	197	209	133	133	263	275	241	241	153	153	140	178	85	93	100	100	1
Balkj_04_53	Baldkjosen_Nordfolda_2004	107	113	192	196	96	108	123	129	137	141	156	164	149	155	122	125	197	197	133	133	283	309	239	241	131	171	184	192	81	89	100	100	1
Balkj_04_54	Baldkjosen_Nordfolda_2004	113	119	192	196	92	96	123	141	115	115	160	172	152	152	116	116	211	211	117	133	285	293	241	241	147	145	140	186	93	93	100	100	1
Balkj_04_56	Baldkjosen_Nordfolda_2004	109	113	192	192	96	96	126	126	115	125	196	200	149	158	143	149	197	197	133	133	273	279	241	241	149	161	140	196	89	89	100	100	1
Balkj_04_59	Baldkjosen_Nordfolda_2004	107	113	188	192	92	104	123	126	115	137	168	200	149	164	140	152	197	209	133	133	255	275	239	239	143	143	176	186	85	93	100	100	1
Balkj_04_60	Baldkjosen_Nordfolda_2004	111	115	192	196	96	96	132	132	125	141	156	196	152	164	149	152	207	207	117	133	287	289	241	249	147	177	186	192	85	89	100	100	1
Balkj_04_61	Baldkjosen_Nordfolda_2004	109	115	192	196	96	104	126	126	115	115	184	212	146	149	125	158	197	197	133	133	269	273	239	245	151	159	144	148	89	89	100	104	1
SkjerN_05_01	Skjerstadfjord_Valnesfjord_2005	105	141	192	196	96	100	129	132	115	115	168	184	146	170	125	146	207	207	117	133	267	293	239	239	141	141	134	134	89	93	100	100	1
SkjerN_05_02	Skjerstadfjord_Valnesfjord_2005	107	111	192	192	96	96	129	129	115	141	148	204	152	167	128	158	197	197	117	133	277	289	241	241	141	159	132	194	0	0	100	100	1
SkjerN_05_03	Skjerstadfjord_Valnesfjord_2005	109	115	192	192	92	96	132	132	115	137	156	180	158	161	143	146	205	211	117	133	281	297	241	245	157	161	142	192	85	89	100	100	1
SkjerN_05_04	Skjerstadfjord_Valnesfjord_2005	107	115	192	192	92	96	126	135	115	129	156	176	161	167	140	155	207	215	117	133	281	281	247	247	145	169	140	162	85	93	100	100	1
SkjerN_05_05	Skjerstadfjord_Valnesfjord_2005	113	117	188	192	96	100	126	126	137	149	164	184	155	158	122	122	197	197	133	133	295	315	245	245	153	169	188	192	93	93	100	100	1
SkjerN_05_06	Skjerstadfjord_Valnesfjord_2005	107	109	192	192	92	96	126	126	115	137	152	176	167	170	122	143	197	209	117	133	283	315	241	241	141	151	132	202	85	89	100	100	1
SkjerN_05_07	Skjerstadfjord_Valnesfjord_2005	107	107	168	192	96	112	126	129	115	115	164	180	158	158	128	140	197	205	117	133	271	287	239	243	131	143	134	136	85	89	100	100	1
SkjerN_05_08	Skjerstadfjord_Valnesfjord_2005	107	117	192	196	96	96	129	135	115	125	128	176	149	155	125	155	197	197	133	133	261	309	245	247	147	153	134	204	81	89	100	100	1
SkjerN_05_09	Skjerstadfjord_Valnesfjord_2005	107	119	188	192	92	92	123	132	115	115	192	196	146	167	134	158	207	209	117	133	257	257	249	249	153	159	136	190	0	0	100	100	1
SkjerN_05_10	Skjerstadfjord_Valnesfjord_2005	113	113	196	196	96	96	138	141	115	115	156	164	149	155	122	140	197	197	117	117	277	309	241	241	155	155	176	198	89	89	100	100	1
SkjerN_05_11	Skjerstadfjord_Valnesfjord_2005	119	141	188	192	96	100	129	141	115	137	172	204	146	149	140	158	197	215	133	133	275	295	241	245	145	169	136	180	89	89	100	100	1
SkjerN_05_12	Skjerstadfjord_Valnesfjord_2005	107	111	192	192	92	100	129	135	137	147	156	156	146	155	122	125	205	205	133	133	247	269	241	249	141	169	134	186	89	93	100	100	1
SkjerN_05_13	Skjerstadfjord_Valnesfjord_2005	107	111	196	196	96	96	126	126	117	145	140	188	161	161	122	152	209	215	133	133	287	349	241	253	141	145	144	196	85	93	100	104	1
SkjerN_05_14	Skjerstadfjord_Valnesfjord_2005	109	113	192	192	96	104	126	132	115	135	164	180	158	167	125	146	205	211	117	117	265	265	239	241	141	173	132	170	89	89	100	104	1
SkjerN_05_15	Skjerstadfjord_Valnesfjord_2005	105	113	192	192	96	96	129	129	115	115	172	172	152	158	122	140	207	209	133	133	281	293	239	241	145	163	134	144	85	89	100	104	2
SkjerN_05_17	Skjerstadfjord_Valnesfjord_2005	107	113	192	192	96	104	126	126	117	119	148	188	143	164	131	155	201	209	117	133	271	295	241	247	161	161	144	156	89	89	100	104	1
SkjerN_05_18	Skjerstadfjord_Valnesfjord_2005	107	117	192	192	92	96	135	135	115	115	176	196	146	149	116	140	197	207	117	133	271	285	239	241	141	143	142	160	85	85	100	100	1
SkjerN_05_19	Skjerstadfjord_Valnesfjord_2005	107	109	192	192	96	96	126	135	131	139	180	192	152	164	122	137	197	197	117	133	285	285	241	245	141	163	172	192	85	85	100	100	1
SkjerN_05_20	Skjerstadfjord_Valnesfjord_2005	107	107	188	192	96	100	129	132	121	139	184	188	149	158	143	149	197	197	133	133	247	297	241	245	141	141	136	204	89	89	100	104	1
SkjerN_05_21	Skjerstadfjord_Valnesfjord_2005	109	113	192	192	92	96	126	141	115	119	168	172	152	152	137	140	197	201	117	133	265	285	243	243	157	157	132	170	89	89	100	104	1
SkjerN_05_22	Skjerstadfjord_Valnesfjord_2005	115	141	192	192	96	96	123	126	115	135	160	164	149	164	122	149	197	215	117	133	263	297	241	247	141	157	150	188	85	93	100	100	1
SkjerN_05_23	Skjerstadfjord_Valnesfjord_2005	109	119	192	192	96	96	126	126	115	115	172	196	152	173	122	152	215	215	117	133	285	285	247	247	151	151	134	176	89	89	100	104	1
SkjerN_05_24	Skjerstadfjord_Valnesfjord_2005	107	113	192	192	96	96	132	141	115	143	176	184	149	155	122	143	197	209	117	133	269	283	239	247	141	151	172	180	85	89	100	104	2
SkjerN_05_25	Skjerstadfjord_Valnesfjord_2005	107	119	192	192	96	96	129	129	117	159	156	172	149	158	143	146	197	205	117	133	259	265	241	245	153	155	158	162	89	89	104	104	1
SkjerN_05_26	Skjerstadfjord_Valnesfjord_2005	107	107	192	192	96	100	123	126	115	135	176	208	152	167	116	116	197	197	117	117	279	281	239	239	143	157	148	170	0	0	100	100	1
SkjerN_05_27	Skjerstadfjord_Valnesfjord_2005	109	109	192	196	92	100	132	138	115	115	176	196	155	164	140	158	197	197	117	133	265	297	241	241	133	141	138	186	89	93	100	100	1
SkjerN_05_28	Skjerstadfjord_Valnesfjord_2005	105	107	192	196	92	96	123	126	145	149	156	184	152	155	140	146	197	197	133	133	271	283	241	241	157	163	186	212	89	89	100	100	1
SkjerN_05_30	Skjerstadfjord_Valnesfjord_2005	109	117	192	192	96	96	126	132	115	119	152	160	173	176	116	122	197	197	117	133	267	297	243	243	145	169	136	154	89	89	100	100	1
SkjerN_05_31	Skjerstadfjord_Valnesfjord_2005	107	107	192	196	92	108	123	141	111	115	168	172	146	152	116	125	197	205	133	133	255	299	241	247	145	159	134	144	89	89	100	100	1
SkjerN_05_32	Skjerstadfjord_Valnesfjord_2005	113	113	192	192	92	96	126	141	115	117	176	184	146	167	128	134	197	207	133	133	253	255	245	247	141	157	136	136	85	89	100	100	1
SkjerN_05_33	Skjerstadfjord_Valnesfjord_2005	109	115	192	196	92	100	135	141	115	115	172	192	152	158	131	146	197	197	117	133	271	285	241	245	163	169	134	158	93	93	100	100	1
SkjerN_05_34	Skjerstadfjord_Valnesfjord_2005	109	109	192	192	100	104	138	138	117	133	176	180	146	158	116	143	197	207	117	133	271	277	243	243	141	143	130	140	89	89	100	100	1
SkjerN_05_35	Skjerstadfjord_Valnesfjord_2005	115	115	184	192	96	96	129	135	115	115	172	200	149	152	116	155	197	197	133	133	271	307	0	0	133	141	136	140	89	93	104	104	1
SkjerN_05_36	Skjerstadfjord_Valnesfjord_2005	105	113	188	192	92	96	126	132	129	141	164	172	164	167	143	143	197	197	117	133	259	261	243	243	133	157	192	212	85	85	100	100	1
SkjerN_05_37	Skjerstadfjord_Valnesfjord_2005	109	113	192	192	96	96	132	132	117	131	192	204	149	149	140	152	197	209	133	133	269	293	239	239	147	153	192	218	85	85	100	100	1
SkjerN_05_39	Skjerstadfjord_Valnesfjord_2005	109	113	192	192	96	96	129	132	129	129	164	184	164	170	122	149	197	207	117	133	265	267	241	245	133	175	180	206	89	89	100	104	1
SkjerN_05_40	Skjerstadfjord_Valnesfjord_2005	113	119	192	192	96	100	126	126	115	137	164	184	149	149	122	128	197	209	117	133	277	283	243	245	145	163	134	178	0	0	100	100	1
SkjerN_05_41	Skjerstadfjord_Valnesfjord_2005	109	111	184	192	100	104	129	138	115	127	176	180	146	152	131	149	197	209	133	133	267	281	239	243	163	173	134	146	89	89	100	100	1
SkjerN_05_42	Skjerstadfjord_Valnesfjord_2005	117	119	192	192	96	96	123	138	115	145	144	160	149	164	122	122	205	207	133	133	279	287	239	245	137	157	138	202	93	93	100	104	1
SkjerN_05_43	Skjerstadfjord_Valnesfjord_2005	105	107	192	196	96	96	126	129	115	137	184	184	146	149	116	116	197	209	117	133	307	307	241	241	157	163	136	200	93	93	100	104	1
SkjerN_05_44	Skjerstadfjord_Valnesfjord_2005	107	109	192	192	92	96	138	138	119	131	160	180	152	155	122	125	197	209	117	133	293	307	241	241	145	147	136	186	93	93	100	104	1
SkjerN_05_45	Skjerstadfjord_Valnesfjord_2005	113	133	192	192	96	96	129	132	115	167	172	200	158	170	122	134	211	211	133	133	265	279	241	245	137	151	140	172	85	85	100	104	1
SkjerN_05_46	Skjerstadfjord_Valnesfjord_2005	105	113	192	192	92	96	132	132	117	145	172	176	149	152	143	146	197	197	117	133	277	289	239	243	157	173	134	192	0	0	100	100	1
SkjerN_05_47	Skjerstadfjord_Valnesfjord_2005	111	119	192	192	96	96	132	138	115	141	176	176	152	161	116	146	197	197	117	133	269	275	239	241	131	139	196	216	85	89	100	100	1
SkjerN_05_48	Skjerstadfjord_Valnesfjord_2005	109	129	192	192	96	96	129	138	135	135	160	176	149	152	146	158	197	205	117	117	265	293	239	243	153	155	178	190	0	0	100	100	1
SkjerN_05_50	Skjerstadfjord_Valnesfjord_2005	113	141	192	196	96	100	132	138	135	147	128	192	158	161	128	146	197	209	117	133	271	295	243	243	165	169	168	184	85	85	100	104	1
SkjerN_05_51	Skjerstadfjord_Valnesfjord_2005	107	109	192	196	96	96	123	129	115	137	160	196	146	152	122	155	207	209	133	133	257	281	241	241	159	169	184	190	85	89	100	100	1
SkjerN_05_52	Skjerstadfjord_Valnesfjord_2005	113	113	168	192	96	104	126	126	141	163	180	184	158	158	122	122	197	209	117	117	263	263	241	241	173	173	170	178	0	0	100	100	1
SkjerN_05_53	Skjerstadfjord_Valnesfjord_2005	109	113	192	192	96	96	126	141	115	145	172	176	155	155	122	143	197	197	117	133	281	281	241	241	141	169	140	188	89	89	100	100	1
SkjerN_05_54	Skjerstadfjord_Valnesfjord_2005	107	107	192	192	92	92	126	141	115	115	172	176	152	155	140	149	207	209	133	133	273	273	241	241	141	149	134	134	89	89	100	100	1
SkjerN_05_55	Skjerstadfjord_Valnesfjord_2005	107	119	192	192	96	100	123	126	115	115	192	196	149	152	122	125	207	207	0	0	267	295	243	245	157	169	134	204	89	89	100	100	1
SkjerN_05_56	Skjerstadfjord_Valnesfjord_2005	107	109	192	192	96	96	135	138	115	115	184	192	146	170	143	146	207	207	117	133	287	321	245	245	141	143	136	202	93	93	100	104	1
SkjerN_05_57	Skjerstadfjord_Valnesfjord_2005	107	119	192	192	96	96	126	141	115	115	128	184	164	176	122	122	197	197	117	133	255	291	239	243	141	163	136	152	89	89	100	104	1
SkjerN_05_60	Skjerstadfjord_Valnesfjord_2005	111	115	192	196	96	108	123	129	119	137	160	172	158	164	122	146	197	215	117	133	263	277	241	241	169	175	134	178	0	0	100	104	1
SkjerN_05_61	Skjerstadfjord_Valnesfjord_2005	111	113	192	192	96	96	129	129	115	121	180	196	149	164	125	146	197	197	117	133	251	279	239	239	153	155	134	148	85	85	100	104	1
SkjerN_05_62	Skjerstadfjord_Valnesfjord_2005	107	107	184	192	96	112	135	135	115	137	160	164	170	170	146	146	197	197	117	117	249	287	245	245	151	153	136	198	0	0	100	100	1
SkjerN_05_63	Skjerstadfjord_Valnesfjord_2005	109	113	192	192	96	104	129	135	117	121	176	176	146	149	128	149	197	207	117	117	267	275	241	243	157	165	134	142	0	0	100	100	1
SkjerN_05_64	Skjerstadfjord_Valnesfjord_2005	123	135	192	192	96	104	129	129	135	143	172	180	149	155	134	149	207	207	133	133	279	293	239	239	151	161	140	192	0	0	100	104	1
SkjerN_05_65	Skjerstadfjord_Valnesfjord_2005	107	113	196	196	96	96	129	132	115	117	184	188	152	155	128	158	193	197	133	133	267	315	245	249	133	137	132	150	89	89	100	104	1
SkjerN_05_66	Skjerstadfjord_Valnesfjord_2005	109	141	192	192	96	96	126	126	127	139	172	172	140	161	122	152	197	207	117	133	277	287	239	241	141	157	140	144	0	0	100	100	1
SkjerN_05_67	Skjerstadfjord_Valnesfjord_2005	109	113	192	192	96	96	126	129	115	115	184	204	146	152	131	140	197	207	117	133	269	319	243	245	141	157	138	140	0	0	100	104	1
SkjerN_05_68	Skjerstadfjord_Valnesfjord_2005	107	113	192	192	96	96	126	141	115	115	156	160	161	167	125	146	209	209	117	133	263	305	241	241	141	163	136	154	89	89	100	104	1
SkjerN_05_69	Skjerstadfjord_Valnesfjord_2005	105	111	192	192	96	96	129	129	115	139	160	204	152	161	122	140	197	211	117	133	277	279	245	249	143	143	134	136	89	89	100	100	2
SkjerN_05_70	Skjerstadfjord_Valnesfjord_2005	107	107	192	192	96	96	126	129	115	135	160	196	152	167	116	134	197	197	117	133	279	279	241	245	131	163	144	194	85	93	100	104	1
SkjerN_05_72	Skjerstadfjord_Valnesfjord_2005	109	109	192	192	96	104	129	135	115	137	168	184	155	158	122	134	197	213	117	133	269	297	241	247	141	155	134	134	93	93	100	100	1
SkjerN_05_73	Skjerstadfjord_Valnesfjord_2005	119	119	192	192	96	96	129	132	115	115	172	196	143	149	128	146	207	215	117	133	275	315	239	241	149	151	134	140	89	89	100	104	1
SkjerN_05_74	Skjerstadfjord_Valnesfjord_2005	109	113	192	192	96	96	123	135	115	115	180	180	146	152	149	149	197	197	117	117	281	283	249	249	153	157	138	150	85	89	100	104	1
SkjerN_05_75	Skjerstadfjord_Valnesfjord_2005	107	119	192	196	96	96	126	135	105	137	180	180	140	158	137	146	197	209	117	133	291	341	239	239	147	165	160	178	85	89	100	100	1
SkjerN_05_76	Skjerstadfjord_Valnesfjord_2005	111	133	192	192	100	100	126	132	115	131	156	164	143	149	146	155	197	197	133	133	283	283	239	249	149	157	152	168	85	89	100	100	1
SkjerN_05_77	Skjerstadfjord_Valnesfjord_2005	109	109	192	192	88	96	123	132	115	139	160	220	140	164	134	149	197	207	117	117	285	285	245	249	139	155	190	190	89	89	100	104	2
SkjerN_05_78	Skjerstadfjord_Valnesfjord_2005	107	119	192	192	96	96	132	147	141	143	200	204	152	155	134	146	205	205	121	133	283	297	241	241	141	145	156	190	93	93	100	100	1
SkjerN_05_79	Skjerstadfjord_Valnesfjord_2005	111	135	192	192	92	104	126	135	115	143	156	160	155	155	122	128	197	205	117	133	285	315	247	247	141	151	182	202	89	89	100	100	1
SkjerN_05_80	Skjerstadfjord_Valnesfjord_2005	111	113	192	192	108	108	123	126	115	115	172	180	152	161	149	149	197	197	133	133	277	277	241	247	141	165	134	136	85	89	100	100	1
SkjerN_05_81	Skjerstadfjord_Valnesfjord_2005	107	119	188	192	92	92	126	141	115	139	180	180	158	167	125	125	197	211	133	133	283	291	247	247	151	153	144	202	85	85	100	100	1
SkjerN_05_82	Skjerstadfjord_Valnesfjord_2005	107	113	192	192	92	96	126	138	115	115	156	176	149	155	122	152	197	197	117	133	253	259	243	249	147	157	132	134	85	89	100	100	1
SkjerN_05_83	Skjerstadfjord_Valnesfjord_2005	105	107	192	196	92	92	126	135	115	115	180	188	158	164	152	152	197	197	117	133	283	287	239	245	141	169	138	212	89	93	100	100	1
SkjerN_05_84	Skjerstadfjord_Valnesfjord_2005	107	113	192	192	88	100	129	135	115	123	156	168	158	167	116	122	209	217	117	133	261	297	245	249	145	145	134	148	89	89	100	104	1
SkjerN_05_85	Skjerstadfjord_Valnesfjord_2005	107	113	192	192	96	100	129	132	115	127	180	204	149	161	140	146	211	211	117	133	287	343	241	241	137	161	136	154	89	93	100	100	1
SkjerN_05_86	Skjerstadfjord_Valnesfjord_2005	107	117	192	192	92	100	126	126	121	145	172	180	149	173	143	152	197	197	117	133	275	285	241	247	139	187	134	166	89	93	100	100	1
SkjerN_05_87	Skjerstadfjord_Valnesfjord_2005	113	115	192	196	96	104	126	135	137	141	164	204	149	164	125	146	197	197	117	117	269	279	241	243	159	163	188	200	89	89	100	100	1
SkjerN_05_88	Skjerstadfjord_Valnesfjord_2005	105	115	192	196	96	96	123	129	115	137	176	208	146	146	128	134	197	211	133	133	269	271	241	241	153	169	140	186	93	93	100	100	1
SkjerN_05_89	Skjerstadfjord_Valnesfjord_2005	107	117	192	192	96	100	126	132	125	139	180	192	170	173	116	140	197	197	133	133	263	287	245	245	151	171	190	196	89	93	100	104	1
SkjerN_05_90	Skjerstadfjord_Valnesfjord_2005	107	119	192	192	96	100	132	135	123	137	168	184	170	173	125	125	197	211	125	133	283	295	239	241	153	157	134	136	89	89	100	100	1
SkjerN_05_91	Skjerstadfjord_Valnesfjord_2005	107	119	192	196	96	96	123	129	121	137	156	164	155	164	122	140	197	215	133	133	263	271	239	249	153	169	162	192	89	89	100	104	1
SkjerN_05_92	Skjerstadfjord_Valnesfjord_2005	107	119	192	192	84	96	123	132	135	135	176	184	149	155	122	158	197	197	117	133	263	281	241	241	155	163	186	194	89	93	100	100	1
SkjerN_05_93	Skjerstadfjord_Valnesfjord_2005	107	107	192	192	96	96	129	135	133	153	164	212	146	149	143	152	197	197	117	133	265	297	243	243	141	155	190	196	93	93	100	100	1
SkjerN_05_94	Skjerstadfjord_Valnesfjord_2005	119	119	192	192	96	112	126	132	115	119	128	172	155	161	122	155	197	205	133	133	273	287	241	245	137	151	162	176	89	89	100	104	1
SkjerN_05_95	Skjerstadfjord_Valnesfjord_2005	115	123	192	192	96	112	132	141	115	115	148	176	146	149	140	149	205	209	117	133	253	285	241	247	141	157	134	138	85	89	100	100	1
Verra_05_01	Verrabotn_2005	109	119	192	196	96	96	123	129	115	145	160	188	155	158	116	155	197	207	133	133	253	265	245	245	141	155	136	196	89	93	100	100	1
Verra_05_02	Verrabotn_2005	107	107	192	192	96	100	126	126	115	125	172	180	155	164	116	122	197	207	117	117	267	325	241	245	141	151	132	194	89	89	100	100	1
Verra_05_03	Verrabotn_2005	113	119	192	192	92	96	126	126	117	119	160	208	146	161	116	122	0	0	117	133	273	279	239	241	135	151	138	140	89	89	100	100	1
Verra_05_06	Verrabotn_2005	107	111	192	192	96	96	126	126	115	147	152	172	158	161	116	155	197	197	117	133	267	281	241	245	141	141	138	174	85	89	100	100	1
Verra_05_07	Verrabotn_2005	111	119	188	192	96	100	126	132	115	155	204	204	149	155	0	0	207	207	133	133	267	277	241	241	145	157	136	190	85	89	100	104	1
Verra_05_08	Verrabotn_2005	105	113	192	192	92	96	126	129	117	121	176	176	149	170	116	152	197	206	133	133	265	277	241	249	151	159	136	140	89	89	100	100	1
Verra_05_09	Verrabotn_2005	107	113	192	192	96	100	126	126	115	115	124	156	155	161	125	155	197	209	133	133	261	299	241	249	157	167	134	136	89	89	100	100	1
Verra_05_10	Verrabotn_2005	111	117	196	196	100	104	126	126	135	137	172	184	146	149	128	140	197	197	117	133	263	315	239	241	131	159	0	0	85	85	100	100	1
Verra_05_11	Verrabotn_2005	107	113	184	192	84	96	126	126	115	119	148	180	152	158	143	152	197	197	133	133	255	263	241	243	155	169	136	136	89	89	100	100	1
Verra_05_12	Verrabotn_2005	105	109	192	192	96	100	129	135	115	121	160	184	146	152	149	149	197	197	133	133	261	283	241	241	133	141	136	136	89	93	100	104	1
Verra_05_13	Verrabotn_2005	105	105	188	192	96	96	129	129	115	145	168	172	149	164	122	137	197	197	117	133	277	281	243	245	139	141	134	204	0	0	100	100	1
Verra_05_14	Verrabotn_2005	107	117	192	192	96	112	129	129	115	145	124	172	146	155	122	155	197	207	117	117	263	277	249	249	133	169	132	172	89	89	100	100	1
Verra_05_15	Verrabotn_2005	107	109	192	192	96	100	126	129	115	135	164	188	152	167	137	146	197	197	117	133	279	323	243	243	137	141	134	162	85	89	100	104	1
Verra_05_16	Verrabotn_2005	105	107	184	192	96	96	132	135	115	135	152	172	146	155	125	146	197	205	117	117	265	271	243	245	151	153	136	162	89	89	100	100	1
Verra_05_17	Verrabotn_2005	113	133	192	192	96	96	126	132	115	133	160	180	149	170	128	143	197	197	117	133	257	289	243	243	147	149	160	196	0	0	100	100	1
Verra_05_18	Verrabotn_2005	111	115	192	192	96	104	123	126	131	141	176	200	146	152	122	140	197	205	117	117	269	281	245	245	169	169	0	0	0	0	100	100	1
Verra_05_19	Verrabotn_2005	107	107	192	192	96	112	117	117	115	121	160	160	143	146	116	122	197	209	117	133	267	271	249	249	149	155	134	162	0	0	100	104	1
Verra_05_20	Verrabotn_2005	109	113	192	196	96	100	126	129	137	139	172	188	152	152	122	122	197	213	133	133	257	275	239	241	151	159	190	198	89	89	100	100	1
Verra_05_21	Verrabotn_2005	107	107	192	192	100	112	129	135	115	159	144	176	146	158	152	158	197	207	133	133	249	289	249	249	147	159	138	192	89	93	100	100	1
Verra_05_22	Verrabotn_2005	113	119	192	192	92	100	120	129	115	121	156	156	143	158	122	137	205	207	117	133	263	331	241	243	147	173	136	136	0	0	100	100	1
Verra_05_23	Verrabotn_2005	113	117	192	196	96	96	129	132	115	143	168	172	152	161	116	125	197	215	117	133	283	295	241	245	151	167	142	176	85	89	100	100	1
Verra_05_24	Verrabotn_2005	107	119	192	192	96	96	129	129	115	115	164	192	149	161	116	140	207	211	133	133	251	267	241	241	133	145	136	162	93	93	100	100	1
Verra_05_25	Verrabotn_2005	109	111	168	192	96	96	129	129	135	137	164	216	149	158	125	143	0	0	133	133	261	287	241	241	0	0	0	0	89	89	100	100	1
Verra_05_26	Verrabotn_2005	107	111	192	192	96	96	129	132	117	135	148	180	149	152	125	155	197	197	117	133	281	323	241	245	157	157	158	172	89	93	100	100	1
Verra_05_27	Verrabotn_2005	107	119	192	192	104	104	126	126	135	155	172	180	146	152	116	149	211	211	117	133	247	263	239	241	155	163	168	202	89	93	100	100	1
Verra_05_28	Verrabotn_2005	105	107	160	192	96	108	132	132	123	137	160	176	146	152	116	146	209	209	117	133	247	287	239	241	141	153	134	140	85	93	100	100	1
Verra_05_29	Verrabotn_2005	111	111	192	192	96	96	126	129	119	143	156	172	146	161	116	146	197	211	117	133	249	291	249	249	139	147	136	178	89	89	100	104	1
Verra_05_30	Verrabotn_2005	111	111	192	192	96	100	123	129	133	133	160	160	152	155	140	149	197	205	117	133	265	273	241	243	131	173	180	192	89	93	100	100	1
Verra_05_31	Verrabotn_2005	113	119	192	192	92	100	126	132	125	137	164	184	155	167	122	158	207	207	117	117	269	281	243	247	145	161	188	204	0	0	100	100	1
Verra_05_32	Verrabotn_2005	119	133	192	192	84	96	126	129	115	141	160	172	158	161	122	146	197	209	117	133	255	287	241	245	151	163	160	192	89	93	100	100	1
Verra_05_33	Verrabotn_2005	107	119	192	192	100	100	132	135	115	123	168	172	158	164	143	146	197	207	117	133	285	289	239	241	143	153	134	136	85	89	100	100	1
Verra_05_34	Verrabotn_2005	111	115	192	196	96	108	126	126	131	137	160	172	146	152	122	149	215	215	117	133	275	291	247	247	151	155	186	196	93	93	100	100	1
Verra_05_35	Verrabotn_2005	105	107	192	192	96	96	126	129	115	131	192	196	146	161	152	155	197	207	117	133	269	285	245	261	149	155	134	192	89	89	100	100	1
Verra_05_36	Verrabotn_2005	113	119	192	196	96	112	126	126	115	143	124	196	155	176	116	134	197	211	117	133	277	295	239	239	157	157	136	140	0	0	100	100	1
Verra_05_37	Verrabotn_2005	109	115	188	192	96	96	126	129	115	137	0	0	146	164	137	146	207	211	117	133	269	303	241	245	157	159	136	190	89	89	100	100	1
Verra_05_38	Verrabotn_2005	107	111	192	192	96	104	126	126	115	115	180	212	140	155	122	140	197	211	117	133	271	295	249	249	0	0	136	148	0	0	100	100	1
Verra_05_39	Verrabotn_2005	105	109	192	192	92	104	126	138	133	133	144	192	164	164	125	131	197	211	133	133	279	305	0	0	159	171	134	172	89	89	100	100	1
Verra_05_41	Verrabotn_2005	111	113	192	196	96	96	126	126	143	145	200	200	146	158	149	152	197	205	117	133	281	293	245	245	169	169	134	194	89	89	100	100	1
Verra_05_42	Verrabotn_2005	111	117	192	192	0	0	126	126	115	115	144	188	146	164	125	143	197	221	117	133	273	285	241	255	149	153	136	192	0	0	100	100	1
Verra_05_43	Verrabotn_2005	109	111	192	192	96	96	123	132	115	141	148	164	146	155	149	149	197	197	117	133	271	289	243	249	133	149	132	174	0	0	100	100	1
Verra_05_44	Verrabotn_2005	107	119	192	192	100	100	129	135	115	115	160	172	143	161	116	116	197	197	133	133	265	289	241	243	151	153	136	136	0	0	100	100	1
Verra_05_45	Verrabotn_2005	109	117	192	192	100	100	126	129	135	139	212	212	146	155	116	125	197	207	117	133	261	291	239	239	147	163	134	194	0	0	100	100	1
Verra_05_46	Verrabotn_2005	119	119	192	192	96	96	135	135	115	115	124	204	152	155	134	137	197	205	133	133	265	283	241	245	153	157	136	176	89	93	100	100	1
Verra_05_47	Verrabotn_2005	115	117	188	192	92	96	126	126	115	115	180	180	151	158	122	134	207	211	117	133	289	295	247	247	163	175	136	178	89	93	100	100	1
Verra_05_50	Verrabotn_2005	107	111	192	192	96	96	126	129	115	115	152	176	152	155	143	152	197	211	117	133	271	309	241	245	141	163	134	188	85	85	100	104	1
Verra_05_51	Verrabotn_2005	107	119	192	192	96	96	126	135	121	129	176	184	149	152	125	158	197	209	117	133	265	289	241	245	133	163	134	188	0	0	100	100	1
Verra_05_52	Verrabotn_2005	107	107	192	192	96	100	126	126	115	137	148	172	149	158	122	152	197	197	117	133	303	337	239	239	153	157	186	196	85	89	100	104	1
Verra_05_53	Verrabotn_2005	117	119	192	196	92	96	129	129	115	151	172	176	149	155	140	152	197	207	117	133	271	279	241	261	139	155	136	178	81	89	100	100	1
Verra_05_54	Verrabotn_2005	109	113	192	192	96	96	129	132	125	125	192	200	146	149	131	134	197	207	117	133	289	289	241	241	153	159	190	192	0	0	100	100	1
Verra_05_55	Verrabotn_2005	107	119	192	192	96	96	126	132	115	115	188	196	155	155	140	140	197	211	117	133	271	299	239	241	141	153	136	144	89	89	100	104	1
Verra_05_56	Verrabotn_2005	0	0	192	192	96	96	123	126	115	129	160	204	149	158	116	122	197	197	117	133	0	0	0	0	149	151	134	134	89	89	100	104	1
Verra_05_57	Verrabotn_2005	111	113	188	192	92	112	129	129	117	149	204	212	155	161	137	143	197	205	117	121	279	283	241	241	137	157	134	184	85	93	100	100	1
Verra_05_58	Verrabotn_2005	109	109	192	192	92	96	126	126	115	135	172	176	146	158	116	146	197	206	133	133	277	289	241	243	131	157	136	188	89	89	100	100	1
Verra_05_59	Verrabotn_2005	107	111	192	192	100	100	132	132	115	115	200	216	149	161	116	137	197	206	117	117	283	289	249	249	137	143	140	146	89	93	100	100	1
Verra_05_60	Verrabotn_2005	111	117	192	196	96	96	123	126	115	115	144	196	149	158	122	122	197	197	117	133	277	283	239	241	159	165	150	174	89	89	100	100	1
Verra_05_61	Verrabotn_2005	109	121	192	192	96	96	132	132	115	145	164	196	145	152	122	122	197	197	117	133	273	297	241	247	141	169	142	180	89	89	100	104	2
Verra_05_62	Verrabotn_2005	107	109	192	192	96	100	0	0	125	147	160	160	152	161	116	125	207	211	117	133	249	269	243	243	137	161	186	190	0	0	100	100	1
Verra_05_63	Verrabotn_2005	107	107	192	192	96	112	126	129	115	125	184	188	146	155	125	152	197	213	117	133	269	289	243	245	141	149	132	134	0	0	100	100	2
Verra_05_64	Verrabotn_2005	115	115	192	192	96	96	123	132	115	123	160	216	149	155	116	137	197	206	117	133	265	281	239	241	147	163	140	162	0	0	100	100	1
Verra_05_65	Verrabotn_2005	107	113	192	192	96	96	129	132	115	115	0	0	152	155	137	149	197	197	117	133	273	287	239	239	151	159	134	166	0	0	100	100	1
Verra_05_66	Verrabotn_2005	113	113	160	192	96	104	126	126	119	135	176	204	137	149	140	158	197	209	133	133	251	277	245	247	149	157	140	162	85	85	100	100	1
Verra_05_67	Verrabotn_2005	109	111	192	192	100	112	126	126	121	141	164	192	146	146	116	125	207	207	117	117	263	281	239	247	141	165	174	180	89	93	100	100	1
Verra_05_68	Verrabotn_2005	107	107	192	196	88	100	132	135	115	115	172	180	146	167	149	149	197	207	0	0	281	283	241	241	157	159	136	136	0	0	100	100	2
Verra_05_69	Verrabotn_2005	111	121	192	192	96	96	129	135	121	123	188	188	146	161	116	143	197	207	117	133	283	305	247	247	147	161	136	140	0	0	100	100	1
Verra_05_70	Verrabotn_2005	107	107	192	192	96	104	126	126	115	115	168	172	149	170	119	149	197	207	117	133	263	341	241	243	161	163	174	188	89	89	100	100	1
Verra_05_71	Verrabotn_2005	107	109	192	192	92	96	129	132	125	137	180	188	155	161	125	158	197	207	117	133	273	293	241	243	141	163	180	190	0	0	100	100	1
Verra_05_72	Verrabotn_2005	109	113	192	192	92	96	129	138	115	115	160	176	152	152	122	155	197	205	117	133	255	291	245	245	157	167	132	190	89	93	100	100	1
Verra_05_73	Verrabotn_2005	113	113	192	192	96	96	126	126	125	147	168	168	143	149	122	125	197	207	133	133	275	311	249	249	139	157	184	196	89	89	100	100	1
Verra_05_74	Verrabotn_2005	107	119	192	192	92	96	123	132	115	157	172	204	152	164	134	140	197	207	117	117	327	341	247	249	153	153	136	196	0	0	100	100	1
Verra_05_75	Verrabotn_2005	105	119	192	196	96	96	123	129	115	117	176	180	146	158	134	146	197	205	117	133	257	279	245	247	141	149	136	140	0	0	100	100	1
Verra_05_76	Verrabotn_2005	107	119	192	192	96	96	129	135	115	135	172	184	158	167	128	149	197	221	117	133	265	273	249	249	151	153	136	190	89	89	100	100	1
Verra_05_77	Verrabotn_2005	119	119	192	192	96	96	129	129	115	115	164	176	149	158	122	131	197	207	133	133	269	285	241	241	139	163	136	136	89	93	100	100	1
Verra_05_78	Verrabotn_2005	115	115	192	192	96	96	126	126	115	129	172	208	146	149	122	158	197	211	117	117	277	277	241	241	151	165	136	178	0	0	100	100	1
Misu_04_01	Midsund_2004	107	107	192	192	96	100	129	129	139	139	176	176	152	158	122	125	197	207	117	133	253	281	245	245	141	163	172	186	0	0	100	100	1
Misu_04_03	Midsund_2004	111	119	192	192	96	96	129	132	131	135	172	180	149	149	122	137	197	197	133	133	271	273	241	241	153	157	134	184	0	0	100	100	1
Misu_04_04	Midsund_2004	105	111	192	192	96	96	126	126	115	125	168	200	158	161	122	149	197	209	133	133	289	315	241	249	131	163	146	190	0	0	100	100	1
Misu_04_05	Midsund_2004	107	117	196	196	92	104	126	135	135	141	156	168	146	155	149	152	197	197	133	133	267	271	241	243	155	167	178	182	0	0	100	100	1
Misu_04_06	Midsund_2004	109	123	192	192	92	96	135	138	115	145	160	192	152	167	122	146	197	211	117	133	233	289	243	245	141	149	132	192	0	0	100	100	1
Misu_04_07	Midsund_2004	115	141	184	192	96	100	126	141	115	149	156	184	146	164	122	146	193	197	117	133	269	319	245	251	141	157	136	194	0	0	100	104	1
Misu_04_08	Midsund_2004	109	111	192	192	92	96	138	141	141	141	156	180	158	173	116	152	197	197	117	133	259	261	235	247	133	157	172	188	0	0	100	100	1
Misu_04_09	Midsund_2004	111	113	192	196	96	100	129	129	137	137	152	204	140	170	116	149	197	197	117	133	293	299	239	241	131	157	172	182	0	0	100	100	1
Misu_04_10	Midsund_2004	107	141	192	192	92	96	126	135	115	145	168	188	149	158	140	149	197	197	133	133	263	277	239	243	157	167	136	174	0	0	100	100	1
Misu_04_11	Midsund_2004	107	117	184	192	96	96	132	138	139	151	160	168	155	170	116	122	207	215	133	133	253	323	243	243	137	143	174	174	0	0	100	100	1
Misu_04_12	Midsund_2004	107	107	192	192	96	96	138	138	115	121	140	204	152	164	137	149	0	0	133	133	255	263	239	241	141	141	136	154	0	0	100	100	1
Misu_04_13	Midsund_2004	107	107	192	192	92	96	123	129	125	141	160	188	155	161	116	125	207	207	133	133	273	297	249	249	147	167	134	192	0	0	100	100	1
Misu_04_14	Midsund_2004	119	119	192	192	92	100	123	123	123	135	164	180	149	179	116	149	197	197	133	133	273	287	241	247	151	163	174	192	0	0	100	100	1
Misu_04_15	Midsund_2004	115	119	188	192	96	96	126	129	115	115	164	184	149	152	122	140	197	197	117	117	277	287	243	251	159	169	134	174	0	0	100	100	1
Misu_04_16	Midsund_2004	107	123	184	192	92	96	141	141	137	145	188	204	152	155	128	137	197	209	133	133	251	279	241	245	147	169	134	194	0	0	100	100	1
Misu_04_17	Midsund_2004	107	109	188	192	96	96	123	126	147	205	192	204	158	167	116	122	197	197	117	133	273	291	239	247	141	163	170	196	0	0	100	100	1
Misu_04_18	Midsund_2004	107	139	192	192	96	96	132	135	115	137	164	204	155	170	116	125	197	211	117	133	277	285	241	241	151	157	136	202	0	0	100	100	1
Misu_04_19	Midsund_2004	113	117	192	192	96	96	132	135	135	145	172	192	149	152	140	149	197	197	117	133	273	287	239	241	151	163	180	204	0	0	100	100	1
Misu_04_20	Midsund_2004	109	115	192	192	96	96	126	138	133	133	140	160	146	170	125	137	197	197	117	133	285	297	241	249	145	147	188	190	0	0	100	100	1
Misu_04_21	Midsund_2004	105	107	192	192	96	104	126	129	115	139	144	172	152	161	116	146	215	215	133	133	269	307	239	249	141	161	184	198	0	0	100	100	1
Misu_04_22	Midsund_2004	113	113	192	192	96	96	123	135	135	139	180	192	149	173	119	122	197	209	117	133	253	265	241	249	151	163	134	172	0	0	100	100	1
Misu_04_23	Midsund_2004	105	113	192	192	96	100	126	126	115	137	164	204	152	173	122	137	197	211	133	133	263	275	241	247	159	163	136	164	0	0	100	100	1
Misu_04_25	Midsund_2004	115	121	192	192	96	96	135	141	139	143	140	160	152	155	122	137	197	197	117	117	273	281	245	245	145	153	178	194	0	0	100	100	1
Misu_04_26	Midsund_2004	113	141	192	192	88	96	126	126	141	143	132	160	149	158	125	158	197	211	117	133	259	271	241	241	141	175	190	196	0	0	100	100	1
Misu_04_27	Midsund_2004	109	121	192	192	96	96	126	129	115	117	164	172	149	152	125	140	197	197	133	133	253	283	239	247	155	155	136	162	0	0	100	100	1
Misu_04_28	Midsund_2004	111	119	188	192	96	108	129	138	133	157	176	180	152	167	137	152	197	197	133	133	261	275	0	0	149	151	134	200	0	0	100	100	1
Misu_04_29	Midsund_2004	113	117	192	192	96	100	132	135	115	115	156	196	152	164	125	140	207	207	133	133	283	287	239	239	169	171	134	200	0	0	100	104	1
Misu_04_30	Midsund_2004	109	111	192	192	96	100	126	126	115	137	128	204	158	161	137	140	197	207	133	133	263	301	241	241	147	163	136	204	0	0	100	100	1
Misu_04_31	Midsund_2004	107	109	192	192	76	96	129	135	131	131	148	172	146	146	143	146	197	197	117	133	265	269	245	245	141	173	178	192	0	0	100	100	1
Misu_04_32	Midsund_2004	111	119	188	192	96	100	126	126	143	147	164	188	149	164	152	152	197	215	117	133	263	281	241	245	145	155	194	196	0	0	100	100	1
Misu_04_33	Midsund_2004	109	141	192	196	96	100	132	135	115	135	152	180	161	167	122	134	197	197	133	133	283	291	239	239	141	163	152	212	0	0	100	104	1
Misu_04_34	Midsund_2004	107	109	192	192	96	100	126	129	115	141	184	200	155	164	122	122	207	207	117	117	261	339	251	251	133	161	156	184	0	0	100	100	1
Misu_04_35	Midsund_2004	107	109	192	192	96	116	126	126	131	143	188	204	149	161	125	149	197	197	117	133	291	291	241	241	145	173	190	194	0	0	100	100	1
Misu_04_36	Midsund_2004	111	115	192	192	92	96	126	132	127	139	176	192	149	161	116	143	197	213	117	117	267	285	245	249	147	153	178	198	0	0	100	100	1
Misu_04_37	Midsund_2004	107	107	192	192	92	112	126	135	139	145	188	200	149	164	116	137	197	197	117	133	269	271	239	245	149	153	162	170	0	0	100	100	1
Misu_04_38	Midsund_2004	107	107	192	192	96	96	129	129	115	139	156	156	158	164	134	155	209	217	133	133	265	283	241	247	163	177	190	194	0	0	100	100	1
Misu_04_39	Midsund_2004	109	141	192	192	96	112	126	132	151	151	164	172	146	167	122	122	205	211	117	133	267	285	241	241	131	153	188	190	0	0	100	100	1
Misu_04_40	Midsund_2004	115	115	192	192	96	96	129	132	119	135	176	176	149	149	125	149	197	197	117	133	281	299	241	241	151	161	140	184	0	0	100	104	1
Misu_04_41	Midsund_2004	107	141	192	192	96	96	126	126	115	137	160	164	149	158	122	131	197	197	121	133	253	311	241	249	151	163	146	180	0	0	100	104	1
Misu_04_43	Midsund_2004	105	109	192	192	96	112	126	138	115	115	148	152	149	149	122	122	207	207	117	133	251	337	245	245	141	157	140	174	0	0	100	100	1
Misu_04_44	Midsund_2004	107	111	192	192	96	96	126	138	137	137	160	180	152	152	125	134	207	215	117	133	271	287	239	241	141	145	198	202	0	0	100	100	1
Misu_04_45	Midsund_2004	107	107	188	188	92	100	123	132	131	139	172	196	158	161	116	146	205	211	117	133	265	283	235	243	163	169	178	198	0	0	100	100	1
Misu_04_46	Midsund_2004	111	113	192	192	96	100	138	138	137	147	156	192	149	158	125	137	197	213	117	117	267	275	239	241	141	141	182	186	0	0	100	100	1
Misu_04_47	Midsund_2004	107	107	192	192	96	96	129	129	115	155	156	204	152	167	128	149	197	207	117	133	279	279	241	241	141	163	140	178	0	0	100	100	1
Misu_04_48	Midsund_2004	107	115	192	192	100	104	132	135	115	139	144	180	158	167	125	149	197	197	133	133	269	289	241	247	151	157	136	210	0	0	100	100	1
Misu_04_49	Midsund_2004	111	123	192	192	96	96	123	129	127	141	176	204	155	167	122	125	197	197	117	133	293	301	243	251	157	163	176	196	0	0	100	100	1
Misu_04_50	Midsund_2004	109	123	192	192	96	96	126	129	135	137	160	168	149	152	116	122	197	197	133	133	269	297	247	247	157	161	136	178	0	0	100	100	1
Misu_04_51	Midsund_2004	107	119	192	192	96	100	126	141	135	143	184	192	161	161	122	122	197	211	117	133	255	297	241	243	141	143	134	186	0	0	100	100	1
Misu_04_52	Midsund_2004	107	113	192	192	96	104	129	132	125	147	160	168	149	149	140	158	197	197	117	117	251	285	241	243	141	147	134	212	0	0	100	100	1
Misu_04_54	Midsund_2004	111	111	192	192	92	96	132	141	129	131	156	200	149	164	116	128	197	197	117	117	271	291	239	249	167	171	142	178	0	0	100	100	1
Misu_04_55	Midsund_2004	107	113	192	192	100	104	129	135	115	115	172	184	158	164	122	122	197	197	117	117	263	275	241	245	131	141	160	162	0	0	100	100	1
Misu_04_56	Midsund_2004	107	119	192	192	96	96	126	138	135	161	184	184	161	164	146	158	197	197	117	133	277	325	241	241	157	159	178	198	0	0	100	104	1
Misu_04_57	Midsund_2004	107	113	192	192	96	96	129	129	139	173	140	148	149	164	116	152	197	211	133	133	271	291	239	241	141	141	180	210	0	0	100	100	1
Misu_04_58	Midsund_2004	107	113	192	192	96	108	126	135	133	145	200	204	152	152	116	116	197	197	117	133	251	317	245	245	133	145	136	190	0	0	100	100	1
Misu_04_59	Midsund_2004	105	109	192	192	96	112	138	147	125	139	168	172	146	146	146	155	197	211	117	133	269	323	241	243	141	143	174	190	0	0	100	100	1
Misu_04_60	Midsund_2004	109	115	192	196	96	96	129	132	115	137	168	192	152	167	140	140	197	197	117	117	293	315	241	245	147	159	138	176	0	0	100	100	1
Misu_04_61	Midsund_2004	123	127	192	192	96	100	129	135	115	137	160	192	152	170	116	137	197	205	117	133	265	283	241	241	159	173	134	170	0	0	100	104	1
Misu_04_62	Midsund_2004	107	119	192	192	100	108	129	129	137	149	156	200	158	161	122	158	197	207	117	117	283	289	253	253	147	147	192	204	0	0	100	100	1
Misu_04_63	Midsund_2004	111	113	192	196	96	96	129	135	123	133	164	164	152	155	116	134	211	211	133	133	275	287	241	243	141	159	188	190	0	0	100	100	1
Misu_04_64	Midsund_2004	111	113	192	192	96	96	132	144	133	137	176	180	167	176	143	146	197	209	117	117	261	263	239	241	133	133	172	192	0	0	100	100	1
Misu_04_65	Midsund_2004	111	113	192	192	96	96	132	144	133	137	176	180	167	176	143	146	197	209	117	117	261	263	239	241	133	133	172	192	0	0	100	100	1
Misu_04_66	Midsund_2004	107	107	192	192	92	96	129	132	141	143	152	156	152	164	137	158	197	197	117	133	257	303	241	245	155	157	196	204	0	0	100	100	1
Misu_04_68	Midsund_2004	111	115	192	192	96	96	126	135	137	143	140	164	146	158	116	122	197	207	133	133	271	289	0	0	151	159	134	170	0	0	100	100	1
Misu_04_69	Midsund_2004	109	113	192	192	104	108	135	141	115	133	156	160	146	164	116	122	197	197	133	133	255	327	241	243	131	143	154	182	0	0	100	100	1
Misu_04_70	Midsund_2004	109	119	188	192	96	96	126	132	137	139	156	156	155	158	128	146	197	211	117	133	289	295	245	249	165	167	176	200	0	0	100	100	1
Misu_04_71	Midsund_2004	105	111	192	192	92	96	129	129	129	131	144	156	149	164	116	116	197	215	133	133	273	283	243	245	157	173	190	194	0	0	100	100	1
Misu_04_72	Midsund_2004	107	113	192	196	92	96	123	126	137	139	160	204	152	161	122	134	197	197	133	133	247	259	243	243	157	159	178	208	0	0	100	100	1
Godo_04_02	Godøy_2004	105	113	192	192	96	100	126	129	115	143	156	164	155	164	122	122	197	197	133	133	273	277	241	245	145	161	138	214	85	93	100	100	1
Godo_04_05	Godøy_2004	107	119	192	192	92	96	129	132	115	145	180	196	137	161	122	122	197	197	117	133	283	301	249	249	137	157	136	190	89	89	100	100	1
Godo_04_06	Godøy_2004	113	117	192	192	96	96	126	138	137	141	172	180	143	161	116	122	197	209	133	133	257	275	243	243	133	147	136	172	89	89	100	104	1
Godo_04_07	Godøy_2004	107	109	192	192	96	96	126	135	115	115	172	188	146	164	113	122	197	205	117	133	287	297	241	245	131	141	134	148	93	101	104	104	2
Godo_04_09	Godøy_2004	113	141	192	192	92	92	138	141	115	159	168	188	152	152	122	146	197	205	117	117	275	281	245	265	155	167	134	180	89	101	100	100	1
Godo_04_10	Godøy_2004	107	113	192	192	100	104	126	126	119	135	148	172	149	164	122	149	197	197	117	117	259	321	249	249	163	171	160	198	89	93	100	100	1
Godo_04_12	Godøy_2004	117	119	192	192	96	96	123	132	115	139	168	180	146	164	122	146	197	209	117	133	255	287	245	245	141	155	134	172	89	89	100	100	1
Godo_04_13	Godøy_2004	107	121	192	192	92	96	129	135	115	145	156	172	152	158	122	155	197	197	117	117	265	267	243	243	141	141	134	140	89	89	100	104	1
Godo_04_14	Godøy_2004	107	111	192	192	96	96	126	129	115	145	180	180	146	158	134	161	197	207	117	133	267	293	239	239	163	169	138	210	89	89	100	104	1
Godo_04_15	Godøy_2004	105	107	192	192	96	96	132	138	125	137	160	164	146	152	125	140	197	207	117	133	263	313	241	245	157	169	170	182	89	93	100	100	1
Godo_04_16	Godøy_2004	107	119	168	192	92	100	129	132	117	135	128	188	146	167	125	137	197	211	117	117	273	291	247	247	151	169	152	180	89	89	100	100	1
Godo_04_17	Godøy_2004	107	113	192	192	92	96	129	132	125	137	140	160	143	152	122	125	197	197	117	133	281	297	241	241	149	159	190	192	89	89	100	104	1
Godo_04_18	Godøy_2004	107	115	192	192	96	96	129	129	115	125	156	180	152	152	122	137	197	197	117	133	263	277	245	245	151	163	136	188	89	93	100	104	1
Godo_04_19	Godøy_2004	107	113	192	192	92	96	126	126	115	121	172	172	155	158	116	143	197	197	117	117	293	317	239	241	157	161	140	188	85	89	100	100	1
Godo_04_20	Godøy_2004	107	107	192	192	84	96	129	138	115	135	180	200	143	152	143	143	197	209	133	133	297	345	243	245	141	145	138	170	89	89	100	104	1
Godo_04_21	Godøy_2004	115	115	192	192	104	104	138	138	115	147	156	168	149	158	122	131	197	197	133	133	285	291	245	247	141	159	158	190	89	89	100	100	1
Godo_04_22	Godøy_2004	115	119	192	192	96	100	123	135	115	117	160	184	152	155	125	146	197	211	117	133	263	319	241	245	143	159	134	136	0	0	100	104	1
Godo_04_23	Godøy_2004	115	137	188	192	104	104	129	129	115	125	156	164	152	161	122	134	197	213	133	133	243	289	241	247	133	155	134	172	89	89	100	100	1
Godo_04_25	Godøy_2004	107	109	192	192	96	96	123	132	115	135	176	184	146	152	122	143	197	205	117	117	285	289	243	245	137	151	138	190	89	89	100	104	1
Godo_04_27	Godøy_2004	107	113	192	192	96	96	126	132	119	121	188	188	146	158	122	122	209	209	133	133	269	271	0	0	141	157	138	138	89	89	104	104	2
Godo_04_28	Godøy_2004	107	113	192	196	92	96	132	135	141	147	188	192	155	158	122	128	211	211	117	117	273	281	241	247	131	179	134	176	85	89	100	100	1
Godo_04_31	Godøy_2004	113	117	192	192	96	96	126	138	125	135	184	184	158	173	143	146	197	197	117	117	281	285	247	249	133	169	138	178	89	101	100	100	1
Godo_04_32	Godøy_2004	111	117	192	192	96	96	138	138	115	139	176	200	149	182	116	125	197	197	117	133	291	325	245	249	157	161	166	206	81	89	100	104	1
Godo_04_34	Godøy_2004	105	119	192	192	96	96	129	138	121	121	180	204	149	152	128	143	207	207	117	117	253	281	241	241	157	169	178	188	89	89	100	104	1
Godo_04_35	Godøy_2004	107	109	192	192	96	104	129	129	115	147	152	176	149	155	128	158	197	207	133	133	269	283	239	241	145	159	138	204	89	89	100	100	1
Godo_04_36	Godøy_2004	113	141	192	196	96	100	129	129	115	165	144	196	149	161	146	149	197	207	117	133	257	291	241	249	137	169	0	0	89	89	100	104	1
Godo_04_37	Godøy_2004	117	117	192	192	92	96	129	132	115	115	196	196	149	149	116	125	197	207	117	133	257	267	241	247	141	149	134	134	89	89	100	104	1
Godo_04_38	Godøy_2004	109	113	192	192	96	96	129	129	115	119	156	156	0	0	0	0	197	211	0	0	285	337	241	245	141	159	132	136	89	89	100	100	1
Godo_04_39	Godøy_2004	109	111	192	192	96	96	126	132	115	121	184	196	149	152	140	140	197	197	117	133	271	305	241	253	149	165	134	194	89	89	100	104	1
Godo_04_40	Godøy_2004	113	113	192	192	96	96	135	141	117	149	184	200	143	155	125	149	197	209	117	133	295	297	245	247	157	165	134	190	85	89	100	100	1
Godo_04_42	Godøy_2004	109	113	188	192	92	96	123	135	119	145	152	176	152	164	125	128	197	207	133	133	263	293	239	241	145	157	134	182	89	93	100	100	1
Godo_04_43	Godøy_2004	107	107	192	192	96	100	126	135	137	149	168	188	164	173	116	122	197	207	133	133	279	347	241	241	137	145	176	188	93	93	100	100	1
Godo_04_44	Godøy_2004	113	141	192	196	96	100	129	129	115	143	176	184	146	158	122	143	197	197	117	133	283	289	241	243	141	163	134	180	89	101	100	100	1
Godo_04_45	Godøy_2004	111	119	188	192	96	100	120	132	115	115	148	196	158	164	143	146	197	197	117	133	259	279	239	245	141	157	140	140	0	0	100	100	1
Godo_04_47	Godøy_2004	115	117	192	192	96	100	126	135	117	145	156	188	146	155	116	128	197	197	133	133	245	281	239	245	131	141	134	204	89	93	100	100	1
Godo_04_48	Godøy_2004	107	115	192	192	92	96	129	138	115	139	192	192	155	155	122	125	197	197	117	117	267	269	241	241	141	153	156	190	93	93	100	100	1
Godo_04_49	Godøy_2004	105	107	192	196	92	96	126	138	119	203	180	204	146	173	116	146	197	207	117	133	275	307	241	243	147	163	138	186	89	89	100	104	1
Godo_04_50	Godøy_2004	107	113	192	192	96	96	126	135	115	117	152	192	155	161	116	125	197	197	117	133	295	319	241	241	153	159	134	142	85	89	104	104	1
Godo_04_52	Godøy_2004	111	119	192	192	92	104	135	141	125	135	156	164	146	152	137	152	197	207	117	133	271	313	0	0	147	163	190	206	89	93	100	100	1
Godo_04_53	Godøy_2004	111	121	184	192	92	116	126	132	125	145	128	172	146	185	116	149	197	197	117	133	263	303	245	247	151	159	174	182	89	89	100	100	1
Godo_04_54	Godøy_2004	113	115	192	192	92	96	126	135	115	119	148	200	158	161	140	140	197	197	117	133	275	279	243	263	141	157	134	140	89	89	100	104	2
Godo_04_56	Godøy_2004	103	105	192	192	96	96	132	135	121	139	156	192	149	155	137	146	197	197	117	117	251	251	241	243	131	157	138	196	89	89	100	104	1
Godo_04_57	Godøy_2004	105	121	184	192	96	96	129	132	115	141	144	184	158	161	107	116	197	197	117	133	267	279	241	241	141	159	144	178	85	89	100	104	1
Godo_04_58	Godøy_2004	107	113	192	192	96	104	123	126	119	135	164	176	158	164	116	143	197	197	117	133	253	269	243	243	147	157	134	136	89	101	100	104	1
Godo_04_59	Godøy_2004	109	111	192	196	96	96	138	138	115	115	172	192	146	161	122	128	197	207	117	133	281	293	245	245	155	165	136	220	89	89	104	104	2
Godo_04_60	Godøy_2004	107	107	192	192	96	100	126	129	115	137	156	168	152	155	116	158	197	197	133	133	275	299	241	245	147	149	130	134	85	93	100	100	1
Godo_04_63	Godøy_2004	105	109	192	192	96	104	132	138	139	147	180	184	149	152	140	146	197	197	117	133	265	281	241	243	141	155	136	200	89	89	100	100	2
Godo_04_64	Godøy_2004	107	119	192	192	100	104	123	132	115	115	164	184	149	158	122	140	197	197	133	133	265	283	245	249	147	167	134	138	85	93	100	104	1
Godo_04_65	Godøy_2004	107	113	192	192	96	100	123	132	115	115	168	176	152	164	113	143	197	211	117	133	279	301	241	247	139	159	186	190	89	89	100	100	1
Godo_04_66	Godøy_2004	111	111	192	192	96	96	126	129	115	143	180	180	146	155	122	149	205	213	117	133	269	331	249	249	147	153	196	204	89	93	100	104	2
Godo_04_68	Godøy_2004	105	115	192	192	92	96	132	138	135	159	176	176	146	152	122	149	197	197	117	133	269	299	239	241	141	141	172	178	89	93	100	100	1
Godo_04_69	Godøy_2004	123	129	192	192	96	96	129	129	115	119	128	180	152	155	134	146	205	209	117	117	277	305	239	239	155	167	134	166	93	93	100	104	1
Godo_04_70	Godøy_2004	109	113	192	192	92	100	135	141	119	143	160	168	149	164	122	140	197	211	133	133	269	277	241	243	133	149	134	144	89	89	100	100	1
Godo_04_71	Godøy_2004	109	109	192	192	92	96	123	126	123	125	172	188	149	158	0	0	0	0	117	133	269	295	241	245	161	165	142	158	85	89	100	104	1
Godo_04_72	Godøy_2004	113	123	192	192	96	96	126	138	115	115	156	188	146	152	122	122	197	207	117	133	255	271	245	245	151	163	140	162	89	93	104	104	1
Godo_04_73	Godøy_2004	109	117	192	192	96	100	126	129	115	143	168	184	161	161	122	146	205	207	117	117	295	337	239	247	145	151	134	194	85	93	100	104	1
Godo_04_74	Godøy_2004	0	0	192	192	96	100	123	129	115	119	168	184	149	158	146	152	197	197	117	133	263	283	241	241	173	173	134	136	89	89	100	104	1
Godo_04_75	Godøy_2004	107	109	192	192	96	100	129	132	115	137	160	172	164	173	116	122	197	197	117	117	291	291	245	245	141	141	132	182	89	93	100	100	1
Godo_04_78	Godøy_2004	107	113	192	192	96	112	135	138	143	151	152	184	146	167	122	152	197	197	133	133	267	269	241	241	141	163	186	188	89	89	100	100	2
Godo_04_79	Godøy_2004	107	119	192	192	96	96	126	135	119	121	164	200	146	161	149	158	197	205	117	133	305	321	243	245	137	153	158	172	81	89	104	104	1
Godo_04_80	Godøy_2004	109	109	192	192	96	96	126	126	115	115	172	176	152	161	125	140	197	205	117	133	249	285	245	245	135	149	148	148	89	89	104	104	2
Godo_04_84	Godøy_2004	107	113	192	192	108	112	126	132	123	129	188	192	149	152	128	134	0	0	117	133	293	297	239	241	167	169	136	184	89	89	100	100	1
Godo_04_85	Godøy_2004	105	111	192	192	96	96	126	138	137	147	176	184	152	152	116	146	197	207	133	133	279	289	241	241	153	153	190	202	81	89	100	104	1
Godo_04_86	Godøy_2004	107	113	192	192	92	92	132	138	137	141	156	188	146	176	122	125	197	197	117	133	263	335	247	253	143	151	134	194	89	93	100	100	1
Vinj_04_01	Vinjefjord_2004	111	121	192	192	92	100	126	132	137	137	180	200	152	161	125	143	207	207	117	133	289	333	245	247	143	155	134	194	0	0	100	100	1
Vinj_04_02	Vinjefjord_2004	109	109	192	192	96	104	126	144	135	145	156	196	143	152	116	137	209	209	133	133	297	309	241	243	133	145	172	210	0	0	100	100	1
Vinj_04_03	Vinjefjord_2004	109	119	192	192	96	96	126	135	141	145	172	192	158	164	125	152	197	209	133	133	273	275	241	243	155	173	158	178	0	0	100	100	1
Vinj_04_04	Vinjefjord_2004	105	109	192	192	96	96	123	129	115	117	172	184	155	158	122	152	207	207	117	133	265	275	0	0	165	165	136	138	0	0	100	100	1
Vinj_04_05	Vinjefjord_2004	119	133	192	192	96	100	126	138	145	145	160	204	149	155	122	128	197	207	117	133	249	351	239	239	159	159	184	186	0	0	100	100	1
Vinj_04_06	Vinjefjord_2004	107	109	184	192	96	112	126	135	129	141	160	160	152	170	149	158	197	197	117	117	271	271	243	249	141	157	178	190	0	0	100	100	1
Vinj_04_07	Vinjefjord_2004	111	115	192	192	92	104	126	135	133	143	168	196	155	161	122	146	197	197	117	117	273	281	241	241	141	141	178	204	0	0	100	100	1
Vinj_04_09	Vinjefjord_2004	109	113	192	192	104	112	132	132	133	139	176	204	149	158	128	131	197	197	117	117	263	277	241	245	163	169	180	184	0	0	100	100	1
Vinj_04_12	Vinjefjord_2004	111	119	192	192	92	96	126	132	115	147	160	196	152	167	122	152	197	205	121	133	263	313	241	241	141	163	134	136	0	0	100	100	1
Vinj_04_13	Vinjefjord_2004	109	111	192	192	96	112	126	132	115	139	176	180	158	161	146	149	197	213	117	133	263	263	241	247	147	173	140	190	0	0	100	100	1
Vinj_04_14	Vinjefjord_2004	117	133	192	196	96	96	126	129	115	115	152	172	149	158	122	140	197	197	117	117	261	281	241	247	151	169	134	136	0	0	104	104	1
Vinj_04_15	Vinjefjord_2004	117	119	192	192	92	96	129	129	141	145	172	192	149	155	122	140	197	203	117	133	271	273	231	247	133	163	162	178	0	0	100	100	1
Vinj_04_16	Vinjefjord_2004	107	119	192	192	92	96	123	138	125	147	196	196	137	152	116	158	197	211	133	133	283	333	241	241	133	175	134	162	0	0	100	100	2
Vinj_04_17	Vinjefjord_2004	113	113	192	192	96	100	135	135	129	139	176	176	155	158	122	122	197	211	117	117	247	273	241	241	139	163	134	136	0	0	100	100	1
Vinj_04_18	Vinjefjord_2004	113	119	192	192	96	104	129	132	119	137	176	176	143	164	122	125	197	197	117	133	265	279	0	0	137	145	134	136	0	0	100	100	1
Vinj_04_19	Vinjefjord_2004	107	111	192	192	96	96	126	138	115	125	156	196	146	146	140	146	197	197	117	133	249	271	241	241	147	157	196	212	0	0	100	100	1
Vinj_04_20	Vinjefjord_2004	129	141	192	192	96	96	126	132	115	115	160	184	152	155	125	131	197	211	117	133	259	279	243	251	145	147	140	156	0	0	100	100	1
Vinj_04_21	Vinjefjord_2004	111	117	192	192	96	112	123	135	145	145	196	212	149	149	125	149	197	211	117	117	267	287	245	245	157	169	174	180	0	0	100	100	1
Vinj_04_23	Vinjefjord_2004	109	119	192	196	96	100	126	138	115	135	168	196	143	146	110	152	206	211	117	117	269	285	239	245	157	159	140	168	0	0	100	104	1
Vinj_04_24	Vinjefjord_2004	107	107	192	192	96	96	126	126	115	115	164	200	152	164	140	149	197	211	117	133	283	285	243	245	141	147	178	178	0	0	100	100	1
Vinj_04_25	Vinjefjord_2004	111	113	192	196	96	100	126	126	127	137	144	180	146	149	125	155	197	197	117	117	263	269	241	243	151	153	140	202	0	0	100	100	1
Vinj_04_26	Vinjefjord_2004	107	113	192	192	96	96	120	132	115	115	188	212	164	173	122	146	197	211	133	133	281	281	245	245	147	155	134	140	0	0	100	104	1
Vinj_04_27	Vinjefjord_2004	105	107	192	192	92	96	129	141	139	141	148	128	158	161	125	131	197	197	117	133	243	287	241	249	165	169	196	202	0	0	100	100	1
Vinj_04_30	Vinjefjord_2004	107	115	192	196	96	96	132	138	115	115	164	196	149	167	122	125	197	207	117	133	271	281	241	241	165	165	134	136	0	0	100	104	2
Vinj_04_31	Vinjefjord_2004	113	119	184	192	96	104	129	132	115	125	180	196	146	173	122	152	197	197	117	133	255	265	239	245	143	167	140	176	0	0	100	100	1
Vinj_04_32	Vinjefjord_2004	111	117	192	196	96	104	132	138	137	139	164	188	146	161	128	158	207	211	133	133	277	309	239	241	155	163	134	178	0	0	100	100	1
Vinj_04_33	Vinjefjord_2004	111	121	184	192	92	96	129	132	115	133	184	196	152	161	134	143	197	211	117	117	259	293	241	249	147	169	136	184	0	0	100	100	1
Vinj_04_34	Vinjefjord_2004	107	113	192	192	88	96	123	132	131	137	180	188	140	149	122	122	197	197	117	133	269	281	241	241	145	165	190	200	0	0	100	100	1
Vinj_04_36	Vinjefjord_2004	111	111	184	184	96	96	132	138	135	137	168	172	146	146	125	125	209	209	117	133	253	267	243	243	157	185	134	186	0	0	100	100	1
Vinj_04_37	Vinjefjord_2004	113	117	192	192	96	100	135	138	115	135	148	164	149	155	122	140	197	199	117	133	281	297	245	249	145	163	180	192	0	0	100	100	1
Vinj_04_38	Vinjefjord_2004	105	107	192	192	96	100	132	141	115	135	168	176	152	164	149	152	205	211	117	133	275	281	245	245	141	145	138	162	0	0	100	100	1
Vinj_04_39	Vinjefjord_2004	107	113	192	192	96	100	126	126	115	141	160	192	146	167	122	122	197	197	133	133	327	333	243	245	145	169	140	186	0	0	100	100	2
Vinj_04_41	Vinjefjord_2004	117	125	192	192	84	96	129	135	115	135	172	180	149	152	122	146	197	197	117	133	253	295	239	249	131	147	134	162	0	0	100	100	1
Vinj_04_42	Vinjefjord_2004	111	131	192	192	92	96	123	126	115	139	188	188	176	182	116	125	197	197	133	133	265	289	241	241	143	169	144	192	0	0	100	100	2
Vinj_04_43	Vinjefjord_2004	113	119	192	192	96	100	123	129	115	129	160	188	158	158	122	125	197	207	133	133	259	267	243	243	145	155	140	180	0	0	100	100	1
Vinj_04_44	Vinjefjord_2004	115	129	192	192	96	112	126	129	117	141	176	176	146	149	122	125	197	197	117	133	257	337	241	241	141	145	176	184	0	0	100	100	1
Vinj_04_47	Vinjefjord_2004	107	113	192	192	96	96	129	135	119	137	164	176	152	158	116	122	197	207	117	133	259	263	241	245	141	141	148	200	0	0	100	100	1
Vinj_04_48	Vinjefjord_2004	109	119	192	192	96	96	126	132	115	137	148	160	149	152	116	122	211	211	133	133	287	339	245	245	141	165	134	196	0	0	100	100	1
Vinj_04_49	Vinjefjord_2004	107	129	192	192	96	100	126	135	133	153	160	168	158	161	116	146	197	207	133	133	243	267	245	245	151	163	134	204	0	0	100	100	1
Vinj_04_50	Vinjefjord_2004	117	117	192	192	96	108	132	138	137	145	164	168	146	146	131	158	197	207	0	0	269	287	239	241	141	145	174	186	0	0	100	100	1
Vinj_04_51	Vinjefjord_2004	109	113	184	192	96	96	129	138	137	139	176	176	146	158	143	146	205	206	117	133	285	329	241	245	141	159	136	180	0	0	100	100	1
Vinj_04_52	Vinjefjord_2004	109	109	192	192	96	100	129	132	125	143	140	180	149	161	125	146	197	197	117	133	275	291	245	245	149	159	174	178	0	0	100	100	1
Vinj_04_53	Vinjefjord_2004	107	119	192	192	96	112	123	126	137	147	160	172	149	164	122	137	197	209	133	133	261	289	241	245	149	153	136	178	0	0	100	100	1
Vinj_04_54	Vinjefjord_2004	119	123	192	192	96	96	132	138	115	143	160	164	155	164	140	149	197	207	133	133	281	285	245	249	137	145	140	172	0	0	100	100	1
Vinj_04_55	Vinjefjord_2004	113	117	192	192	96	100	129	135	141	145	168	176	152	170	146	146	197	197	117	133	265	297	245	245	147	153	136	190	0	0	100	100	1
Vinj_04_56	Vinjefjord_2004	107	107	196	196	96	108	126	129	129	141	152	172	155	164	152	158	197	209	117	117	259	287	239	241	145	145	156	188	0	0	100	104	1
Vinj_04_57	Vinjefjord_2004	115	119	192	192	96	96	132	132	135	145	172	200	152	161	116	116	197	197	133	133	271	335	241	245	153	169	172	184	0	0	100	100	1
Vinj_04_58	Vinjefjord_2004	113	113	192	192	96	96	126	129	117	133	140	184	146	152	122	125	197	205	117	133	265	285	241	243	161	175	152	188	0	0	100	100	1
Vinj_04_59	Vinjefjord_2004	113	119	192	196	96	104	129	141	141	149	160	196	152	164	128	143	205	207	133	133	269	289	241	249	143	163	134	184	0	0	100	100	1
Vinj_04_60	Vinjefjord_2004	105	113	192	192	96	96	129	138	115	145	204	208	158	176	122	146	0	0	117	133	271	273	243	247	149	159	134	194	0	0	100	100	1
Vinj_04_61	Vinjefjord_2004	113	115	192	192	92	96	126	138	139	143	156	184	149	152	146	152	197	197	133	133	267	279	245	249	141	149	134	196	0	0	100	100	1
Vinj_04_62	Vinjefjord_2004	111	115	192	196	96	96	126	129	115	145	188	188	152	155	134	146	197	211	133	133	261	273	245	245	163	163	136	192	0	0	100	100	1
Vinj_04_63	Vinjefjord_2004	113	119	192	192	96	96	135	141	135	151	172	184	149	161	122	158	197	207	117	133	271	293	245	245	145	159	0	0	0	0	100	100	1
Vinj_04_64	Vinjefjord_2004	105	113	192	192	96	96	123	141	145	163	160	172	152	152	122	128	197	207	133	133	273	291	241	245	141	149	180	182	0	0	100	100	1
Vinj_04_65	Vinjefjord_2004	107	113	192	192	100	104	129	138	115	135	172	172	155	167	116	140	197	209	133	133	255	269	241	241	155	163	136	204	0	0	100	100	1
Vinj_04_67	Vinjefjord_2004	109	113	192	192	96	104	126	129	125	129	144	168	152	152	122	122	197	197	117	133	253	285	239	245	145	155	172	194	0	0	100	100	1
Vinj_04_68	Vinjefjord_2004	109	123	192	192	92	92	129	135	135	135	164	196	152	161	125	152	197	211	133	133	255	271	241	241	145	163	180	194	0	0	100	100	1
Vinj_04_70	Vinjefjord_2004	109	117	192	192	92	104	141	159	121	133	156	192	149	152	140	158	197	207	117	133	277	299	241	243	147	157	134	198	0	0	100	100	1
Vinj_04_71	Vinjefjord_2004	113	117	192	192	92	96	135	135	135	137	192	200	155	161	116	158	205	209	117	133	263	279	239	249	157	157	178	204	0	0	100	100	1
Vinj_04_72	Vinjefjord_2004	107	119	192	192	96	96	135	135	115	115	204	204	146	167	116	122	197	207	133	133	287	287	0	0	141	141	134	136	0	0	100	100	1
Vinj_04_74	Vinjefjord_2004	119	119	192	192	92	96	129	132	115	147	156	188	155	155	152	158	207	211	117	133	275	281	241	241	149	149	172	174	0	0	100	100	1
Vinj_04_75	Vinjefjord_2004	107	107	192	196	96	108	135	138	121	145	164	188	152	164	125	158	197	211	117	133	261	279	239	251	153	157	140	168	0	0	100	100	1
Vinj_04_76	Vinjefjord_2004	113	119	192	192	92	96	132	147	115	115	172	172	158	164	116	131	197	209	117	133	271	273	245	247	151	151	134	136	0	0	100	100	1
Vinj_04_77	Vinjefjord_2004	113	113	192	192	96	96	126	132	135	137	156	192	158	158	128	149	197	197	133	133	265	299	239	243	151	173	136	180	0	0	100	100	1
Vinj_04_78	Vinjefjord_2004	113	115	192	192	96	100	126	132	119	133	180	192	149	152	143	152	197	197	117	133	239	249	239	241	131	131	134	190	0	0	100	100	1
Vinj_04_79	Vinjefjord_2004	105	109	192	192	96	104	126	129	121	143	160	172	155	167	134	137	197	197	133	133	245	265	241	245	141	141	134	154	0	0	100	100	1
Vinj_04_80	Vinjefjord_2004	105	111	192	192	96	100	126	126	115	119	184	204	146	155	116	122	197	197	117	133	283	283	245	247	163	163	136	140	0	0	100	100	1
Vinj_04_81	Vinjefjord_2004	119	119	192	196	96	96	123	138	115	115	160	200	149	170	149	152	197	197	133	133	245	293	243	245	141	149	140	162	0	0	100	104	1
Vinj_04_82	Vinjefjord_2004	107	113	192	192	96	108	129	129	125	141	160	200	152	158	125	155	197	197	117	133	269	271	241	241	151	151	192	192	0	0	100	100	1
Vinj_04_84	Vinjefjord_2004	107	111	192	192	92	96	129	138	125	145	176	200	152	170	128	152	197	197	117	133	265	291	243	245	133	141	178	198	0	0	100	100	1
Vinj_04_85	Vinjefjord_2004	113	113	192	192	96	104	123	135	135	137	156	196	149	155	116	122	197	213	117	133	265	281	243	243	137	163	134	140	0	0	100	100	1
Vinj_04_87	Vinjefjord_2004	111	121	192	192	96	104	129	141	119	141	156	176	146	152	122	140	197	197	117	133	263	277	239	243	163	169	136	178	0	0	100	100	1
Vinj_04_88	Vinjefjord_2004	109	113	192	192	96	96	126	126	115	157	160	196	149	149	116	125	197	197	133	133	269	291	0	0	163	163	134	134	0	0	100	100	1
Vinj_04_89	Vinjefjord_2004	107	113	180	192	100	112	126	132	111	115	176	200	158	164	122	125	197	207	117	133	265	273	239	241	145	151	140	140	0	0	100	100	1
Vinj_04_90	Vinjefjord_2004	111	115	192	192	100	104	126	132	115	137	172	188	149	161	134	134	197	197	117	133	263	287	239	239	161	163	136	142	0	0	100	100	1
Vinj_04_92	Vinjefjord_2004	109	109	192	192	92	96	129	129	121	125	164	176	146	149	122	140	197	207	117	133	297	333	241	241	157	157	140	170	0	0	100	100	2
Vinj_04_93	Vinjefjord_2004	109	119	192	196	96	96	126	129	139	143	164	176	149	149	116	134	207	207	117	133	265	277	241	251	153	175	170	204	0	0	100	100	1
Vinj_04_94	Vinjefjord_2004	115	123	192	192	96	100	123	138	115	135	184	192	143	155	122	146	207	211	133	133	257	269	245	245	141	141	176	186	0	0	100	100	1
Vinj_04_95	Vinjefjord_2004	109	119	192	192	92	96	123	126	121	141	160	184	149	158	140	152	197	197	133	133	269	269	239	241	157	169	160	196	0	0	100	100	1
Vinj_04_96	Vinjefjord_2004	107	119	192	196	92	96	135	135	121	137	188	204	149	149	116	155	197	197	117	133	289	299	243	249	137	143	134	192	89	89	100	100	1
Vinj_04_97	Vinjefjord_2004	113	113	192	192	96	96	126	126	115	147	148	168	140	164	128	143	197	207	117	133	265	277	241	245	141	153	134	140	93	93	100	100	1
Vinj_04_98	Vinjefjord_2004	107	113	192	192	96	96	135	147	115	115	172	200	149	155	122	149	197	209	117	133	253	311	239	241	159	173	138	174	89	89	100	100	1
Vinj_04_99	Vinjefjord_2004	107	111	192	192	92	96	123	123	115	139	172	184	161	173	122	146	197	199	117	133	247	297	241	241	157	169	144	190	93	93	100	100	1
Vinj_04_100	Vinjefjord_2004	107	107	192	192	96	96	132	141	115	115	172	188	146	152	116	146	197	197	117	117	269	271	241	249	141	143	134	196	85	85	100	100	1
Vinj_04_101	Vinjefjord_2004	107	111	192	192	96	100	126	132	141	143	172	180	149	152	116	122	197	207	133	133	245	287	0	0	145	155	180	192	85	93	100	100	1
Vinj_04_102	Vinjefjord_2004	109	113	192	192	92	104	126	132	115	187	172	180	158	164	152	158	197	211	117	133	279	301	245	249	149	169	140	184	0	0	100	100	1
Vinj_04_103	Vinjefjord_2004	119	119	188	192	96	96	129	129	137	139	140	184	143	155	116	134	211	211	117	117	277	279	239	241	167	171	142	186	89	89	100	100	1
Vinj_04_104	Vinjefjord_2004	105	113	192	192	96	112	123	138	115	145	180	192	155	158	128	134	197	209	117	133	267	283	241	245	141	169	134	164	85	85	100	100	1
Vinj_04_105	Vinjefjord_2004	105	105	192	192	92	96	126	126	137	147	180	180	149	158	119	122	197	197	117	133	285	293	241	241	141	169	138	168	89	89	100	100	1
Vinj_04_106	Vinjefjord_2004	105	107	192	192	96	96	123	129	143	143	160	160	146	161	122	125	197	205	133	133	265	281	239	241	145	145	190	192	81	93	100	100	1
Vinj_04_107	Vinjefjord_2004	109	139	184	192	96	96	123	129	115	139	164	184	152	158	122	128	205	205	117	133	267	297	241	247	141	155	168	188	93	93	100	100	1
Vinj_04_108	Vinjefjord_2004	111	115	190	192	92	96	126	126	115	139	172	204	158	161	116	149	197	197	117	133	269	277	241	245	143	165	136	178	0	0	100	100	1
Vinj_04_109	Vinjefjord_2004	107	111	192	192	96	96	126	126	115	139	176	184	152	164	122	152	197	197	133	133	275	287	245	245	149	153	136	140	85	89	100	100	1
Vinj_04_110	Vinjefjord_2004	107	109	192	196	96	96	126	138	139	143	156	184	146	161	122	149	197	207	133	133	267	337	245	249	163	163	134	136	93	93	100	100	1
Vinj_04_111	Vinjefjord_2004	107	111	192	192	92	96	123	135	115	153	164	184	149	158	122	140	197	211	117	133	283	299	0	0	141	145	134	140	85	89	100	104	1
Vinj_04_112	Vinjefjord_2004	107	111	192	192	96	96	126	141	137	139	172	208	152	167	122	125	197	207	117	133	255	301	241	241	151	153	172	204	0	0	100	100	1
Borg_05_01	Borgunfjord_2005	107	111	192	192	96	96	126	129	125	131	160	204	149	158	125	143	197	211	117	133	287	287	243	247	141	145	136	188	93	93	100	100	2
Borg_05_02	Borgunfjord_2005	107	115	192	192	96	100	120	126	141	141	168	172	155	155	122	149	197	197	117	133	277	319	243	247	155	159	184	198	93	93	100	100	1
Borg_05_04	Borgunfjord_2005	107	113	192	192	96	104	132	138	115	147	188	196	152	155	137	155	197	211	117	133	263	281	247	247	157	159	150	192	89	89	100	104	1
Borg_05_05	Borgunfjord_2005	0	0	192	192	96	100	126	132	115	139	172	196	143	155	116	149	197	197	117	133	269	289	239	241	159	163	134	172	85	89	100	100	1
Borg_05_06	Borgunfjord_2005	107	111	0	0	96	96	129	129	0	0	156	160	149	170	122	134	207	207	117	133	329	345	239	243	137	149	136	178	85	89	100	100	1
Borg_05_07	Borgunfjord_2005	113	135	192	192	96	104	129	129	115	153	184	200	140	149	125	137	197	211	133	133	271	317	245	247	141	147	134	190	89	93	100	100	1
Borg_05_09	Borgunfjord_2005	113	119	192	192	96	108	126	135	115	117	188	204	158	161	137	158	197	205	133	133	255	287	245	245	157	165	140	178	89	89	100	100	2
Borg_05_10	Borgunfjord_2005	107	117	192	192	96	96	129	135	147	151	204	204	155	155	116	122	209	209	117	133	261	277	239	243	153	169	134	178	85	85	100	100	1
Borg_05_11	Borgunfjord_2005	107	107	184	192	96	96	129	129	115	135	188	188	158	158	134	137	209	209	117	117	265	291	245	245	151	163	138	174	89	93	100	104	1
Borg_05_12	Borgunfjord_2005	117	117	192	192	96	96	135	138	119	127	160	164	152	164	140	140	207	207	133	133	291	301	0	0	145	157	138	162	85	89	100	100	1
Borg_05_13	Borgunfjord_2005	107	107	192	192	96	104	126	138	115	137	192	196	152	173	140	152	197	197	117	133	271	275	239	239	141	155	158	178	89	93	100	104	1
Borg_05_14	Borgunfjord_2005	107	109	192	192	92	96	126	141	115	115	184	188	164	179	116	125	197	211	117	117	259	281	245	245	147	163	162	192	85	85	100	100	1
Borg_05_15	Borgunfjord_2005	109	119	168	192	92	96	126	126	115	127	200	208	155	158	0	0	197	197	0	0	263	275	241	241	141	151	136	138	0	0	100	104	1
Borg_05_16	Borgunfjord_2005	105	109	192	192	96	100	126	129	135	143	148	148	152	155	116	122	197	197	117	133	279	293	241	241	155	157	170	184	89	89	100	100	1
Borg_05_17	Borgunfjord_2005	119	119	192	192	96	108	123	123	133	133	156	172	143	149	116	143	197	211	117	133	255	299	241	245	141	153	184	190	85	85	100	100	1
Borg_05_19	Borgunfjord_2005	107	113	184	196	96	96	129	129	131	145	156	184	149	152	116	158	197	207	133	133	287	289	241	245	155	169	162	204	85	89	100	100	1
Borg_05_20	Borgunfjord_2005	111	113	188	192	92	96	126	138	115	137	152	172	149	155	134	146	197	197	133	133	265	277	241	243	163	167	134	136	85	89	100	100	1
Borg_05_21	Borgunfjord_2005	109	109	192	192	96	104	129	132	121	125	184	192	149	167	140	161	197	213	117	117	261	301	241	249	141	157	134	196	85	93	100	104	2
Borg_05_22	Borgunfjord_2005	109	113	192	196	92	96	129	132	117	131	156	196	164	164	116	122	197	207	117	133	267	273	245	247	163	175	140	176	93	93	100	104	1
Borg_05_23	Borgunfjord_2005	109	109	188	192	92	92	129	132	115	125	160	204	149	158	122	122	211	213	117	133	329	329	241	241	141	163	136	192	93	93	100	100	1
Borg_05_24	Borgunfjord_2005	113	121	188	192	96	100	129	138	115	135	164	164	149	161	122	125	197	197	117	133	279	285	241	249	141	149	158	184	93	101	100	104	1
Borg_05_25	Borgunfjord_2005	107	107	192	192	92	96	132	138	117	121	208	208	161	161	110	128	205	205	117	133	265	267	245	255	135	149	134	136	85	89	100	100	1
Borg_05_28	Borgunfjord_2005	113	119	188	192	92	100	126	129	115	141	168	176	149	164	140	152	197	215	117	133	277	279	241	247	153	169	134	184	89	89	100	100	1
Borg_05_29	Borgunfjord_2005	105	109	192	192	96	100	126	135	135	139	140	196	152	161	122	161	215	215	117	117	273	285	245	245	149	161	162	194	85	89	100	100	1
Borg_05_30	Borgunfjord_2005	113	119	192	192	92	96	129	135	137	139	200	200	146	167	116	122	197	197	117	133	271	287	239	249	143	149	134	174	93	93	100	100	2
Borg_05_31	Borgunfjord_2005	109	113	192	192	96	96	129	135	115	141	188	192	155	158	122	164	197	205	117	133	259	273	241	243	155	155	134	160	89	89	100	104	1
Borg_05_32	Borgunfjord_2005	105	107	192	192	96	96	126	126	115	115	160	192	143	152	122	131	207	211	117	133	297	329	239	241	157	161	136	198	89	89	100	100	1
Borg_05_33	Borgunfjord_2005	113	117	192	192	96	96	126	126	115	137	168	176	167	182	122	128	197	197	117	133	281	373	245	245	159	163	140	190	89	89	100	100	1
Borg_05_34	Borgunfjord_2005	109	113	192	192	96	100	123	126	115	115	164	184	155	164	116	140	197	197	117	117	265	269	241	241	133	141	134	210	85	89	100	100	1
Borg_05_35	Borgunfjord_2005	107	107	192	192	96	96	129	138	137	153	156	160	146	161	128	134	197	197	117	133	253	259	241	249	141	149	204	208	89	89	100	104	1
Borg_05_36	Borgunfjord_2005	107	125	188	192	96	100	126	132	115	119	156	188	149	158	122	158	197	215	117	133	267	299	245	245	143	147	176	188	85	85	100	100	1
Borg_05_37	Borgunfjord_2005	107	117	192	192	96	100	126	129	137	145	180	196	152	167	116	152	211	211	117	133	255	277	243	247	141	161	178	194	0	0	100	100	1
Borg_05_38	Borgunfjord_2005	107	109	192	192	92	104	129	129	137	137	176	188	152	164	116	155	197	197	133	133	277	289	241	241	141	155	178	190	89	89	100	100	1
Borg_05_39	Borgunfjord_2005	119	119	192	192	92	96	120	123	135	167	128	192	152	155	116	128	197	205	117	133	265	287	239	245	141	141	180	188	85	89	100	100	1
Borg_05_40	Borgunfjord_2005	113	113	192	192	96	96	126	129	115	115	184	196	152	167	146	146	211	215	117	133	281	293	241	245	153	159	130	176	85	89	100	104	1
Borg_05_41	Borgunfjord_2005	113	113	188	192	96	112	126	126	135	139	176	180	149	161	110	149	205	207	117	133	287	297	249	249	153	169	176	208	89	93	100	100	1
Borg_05_42	Borgunfjord_2005	111	119	192	192	96	108	138	141	115	137	172	192	155	161	122	143	197	207	117	133	269	277	241	245	141	151	156	190	93	93	100	100	1
Borg_05_43	Borgunfjord_2005	109	109	192	192	92	104	126	132	137	143	172	172	149	179	125	146	197	215	133	133	271	291	241	245	141	147	168	212	85	85	100	100	1
Borg_05_44	Borgunfjord_2005	109	113	192	192	92	96	123	129	115	137	188	192	152	164	122	146	197	207	117	133	265	285	243	245	137	143	140	172	0	0	100	100	1
Borg_05_45	Borgunfjord_2005	107	113	192	192	92	100	0	0	137	143	156	172	149	149	125	146	207	207	133	133	271	279	239	239	159	161	190	208	89	89	100	100	1
Borg_05_46	Borgunfjord_2005	105	113	192	192	100	100	129	129	125	139	172	212	149	161	122	137	197	201	133	133	279	299	241	243	141	153	186	190	89	93	100	100	1
Borg_05_47	Borgunfjord_2005	113	115	192	192	92	96	129	129	135	145	176	180	155	161	122	125	197	209	117	117	261	267	243	243	141	149	162	188	89	93	100	100	1
Borg_05_48	Borgunfjord_2005	119	119	192	192	96	112	126	129	141	145	200	204	149	155	125	140	197	197	117	117	271	289	241	245	151	163	136	190	89	89	100	100	1
Borg_05_49	Borgunfjord_2005	107	119	192	192	100	104	126	138	115	153	192	204	149	161	125	152	207	211	117	133	261	281	247	251	137	141	134	136	89	89	100	100	1
Borg_05_50	Borgunfjord_2005	111	119	192	192	100	100	126	129	133	135	172	180	146	155	116	146	197	211	117	117	269	297	239	241	147	171	134	194	89	89	100	100	1
Borg_05_51	Borgunfjord_2005	105	111	192	192	92	96	135	135	115	133	152	152	146	146	128	158	197	197	117	117	261	283	239	241	131	153	156	204	85	85	100	100	1
Borg_05_52	Borgunfjord_2005	117	119	192	192	92	96	126	138	147	157	188	208	152	158	122	143	197	197	117	117	277	281	245	245	145	145	172	184	85	89	100	100	1
Borg_05_53	Borgunfjord_2005	107	109	192	192	92	96	129	129	115	125	180	180	149	158	140	152	197	213	133	133	267	295	239	265	153	169	134	158	85	89	100	100	1
Borg_05_54	Borgunfjord_2005	105	109	192	192	96	96	132	135	135	143	172	184	146	155	122	152	197	211	117	133	275	277	243	243	163	165	134	190	93	93	100	100	1
Borg_05_55	Borgunfjord_2005	113	113	192	192	96	100	126	135	131	131	148	180	146	158	122	146	197	207	117	133	269	273	239	243	131	169	192	192	89	89	100	100	1
Borg_05_56	Borgunfjord_2005	107	109	192	192	96	96	132	138	139	155	172	188	152	164	122	146	207	209	117	133	263	273	239	241	151	157	134	162	85	89	100	100	1
Borg_05_57	Borgunfjord_2005	107	119	192	192	96	100	132	135	131	137	176	176	152	158	116	122	197	197	133	133	269	275	241	243	157	157	134	190	89	89	100	100	1
Borg_05_58	Borgunfjord_2005	107	107	188	192	96	96	126	126	137	163	180	196	146	149	116	122	197	197	117	117	297	313	241	245	141	173	134	188	93	93	100	100	1
Borg_05_59	Borgunfjord_2005	107	115	192	192	96	96	132	135	135	139	168	196	152	158	116	146	197	207	117	133	287	305	243	247	143	165	188	190	89	89	100	100	1
Borg_05_60	Borgunfjord_2005	107	109	192	196	96	96	126	126	115	115	180	208	158	161	116	137	205	207	133	133	263	305	241	243	131	163	136	138	89	89	100	100	1
Borg_05_61	Borgunfjord_2005	111	111	192	192	96	96	126	135	115	135	160	172	149	167	122	128	197	197	117	133	271	281	243	249	149	163	140	190	85	89	100	104	1
Borg_05_62	Borgunfjord_2005	113	113	188	192	96	96	123	126	115	135	184	196	152	158	122	122	197	207	133	133	273	291	243	243	169	185	190	202	93	93	100	104	1
Borg_05_63	Borgunfjord_2005	107	107	192	192	100	100	126	135	125	143	164	180	158	164	125	125	211	211	133	133	261	289	241	243	151	163	134	182	93	93	100	100	1
Borg_05_64	Borgunfjord_2005	109	119	192	192	92	96	126	135	115	141	156	184	149	176	125	125	197	207	117	117	253	255	241	247	157	173	144	192	89	93	100	104	1
Borg_05_65	Borgunfjord_2005	107	113	192	192	92	92	132	135	115	139	160	180	158	161	134	143	197	197	133	133	269	271	245	245	139	153	134	178	85	89	100	100	1
Borg_05_66	Borgunfjord_2005	109	117	192	192	96	96	129	129	115	137	188	200	146	155	146	152	197	197	117	133	285	289	245	245	141	141	140	194	89	89	100	100	1
Borg_05_67	Borgunfjord_2005	111	119	192	192	96	96	126	132	115	119	168	176	164	167	116	122	197	205	117	133	273	339	239	239	151	153	134	140	89	89	100	100	1
Borg_05_68	Borgunfjord_2005	109	113	192	192	96	96	123	138	143	147	156	200	161	170	116	161	207	209	133	133	261	299	241	247	151	157	182	184	89	89	100	100	1
Borg_05_69	Borgunfjord_2005	107	109	192	192	92	96	126	126	135	137	168	200	152	164	149	152	197	197	117	133	267	287	241	241	163	163	198	204	89	89	100	100	1
Borg_05_70	Borgunfjord_2005	105	111	192	192	96	100	126	126	115	125	156	176	152	158	122	143	197	213	117	117	253	299	241	249	141	141	144	178	85	85	100	100	2
Borg_05_71	Borgunfjord_2005	113	113	192	192	96	96	123	126	125	137	172	188	146	146	140	146	197	197	133	133	271	273	239	241	163	163	158	190	89	89	100	100	1
Borg_05_72	Borgunfjord_2005	113	119	192	192	96	104	126	129	141	145	160	188	149	161	116	122	197	197	117	133	287	305	243	243	141	155	134	178	89	93	100	100	1
Borg_05_73	Borgunfjord_2005	113	119	188	192	96	96	129	129	125	135	172	180	146	146	125	158	197	197	133	133	265	267	247	247	145	159	186	200	0	0	100	100	1
Borg_05_74	Borgunfjord_2005	117	117	188	196	96	96	123	132	115	143	176	204	149	164	116	158	197	209	117	117	261	269	241	241	169	183	136	188	89	89	100	100	1
Borg_05_75	Borgunfjord_2005	115	115	192	196	92	96	132	132	115	137	144	160	152	158	125	140	197	197	117	133	255	283	239	239	141	171	140	188	85	89	100	100	1
Borg_05_76	Borgunfjord_2005	107	129	192	192	92	100	126	132	117	137	164	184	152	164	128	140	197	207	117	133	261	287	241	243	153	157	158	196	89	89	100	100	1
Borg_05_77	Borgunfjord_2005	105	107	192	192	96	96	129	129	115	163	156	196	152	170	116	122	197	211	133	133	289	291	245	249	147	155	182	194	89	89	100	104	1
Borg_05_78	Borgunfjord_2005	113	121	192	192	96	100	129	138	115	115	160	176	158	170	122	146	197	197	117	133	267	273	245	245	161	163	186	196	85	93	100	100	1
Borg_05_79	Borgunfjord_2005	105	113	192	192	96	108	126	135	115	115	192	204	158	161	116	155	197	206	133	133	273	293	241	245	141	157	134	136	85	89	100	104	1
Borg_05_80	Borgunfjord_2005	105	105	192	192	92	96	126	138	115	115	196	200	146	170	143	143	197	211	117	133	251	301	239	243	141	149	144	156	89	89	100	104	1
Borg_05_81	Borgunfjord_2005	107	113	192	196	96	96	132	135	131	143	176	184	149	170	116	149	197	211	117	133	265	281	241	249	135	173	134	162	89	89	100	104	1
Borg_05_82	Borgunfjord_2005	107	113	192	192	96	96	129	138	149	167	160	188	164	164	152	158	197	207	117	133	253	285	245	245	157	159	184	188	89	93	100	100	1
Borg_05_83	Borgunfjord_2005	107	109	192	196	100	104	126	129	131	139	180	188	155	164	122	131	197	197	133	133	0	0	239	241	0	0	134	198	85	89	100	100	1
Borg_05_84	Borgunfjord_2005	117	123	192	196	96	96	132	135	135	137	160	172	146	164	116	149	197	207	133	133	293	305	241	253	141	163	182	194	89	89	100	100	1
Borg_05_85	Borgunfjord_2005	107	115	192	196	96	100	126	126	147	163	164	176	155	164	122	143	205	207	117	133	273	289	241	247	153	153	160	190	89	89	100	100	1
Borg_05_86	Borgunfjord_2005	113	113	192	196	96	96	126	129	115	129	172	176	152	155	140	146	197	205	133	117	269	315	243	249	145	163	162	172	93	93	100	100	1
Borg_05_87	Borgunfjord_2005	113	113	192	196	96	104	120	135	115	145	160	180	149	152	116	140	197	197	117	117	253	271	241	243	141	173	140	178	89	89	100	100	1
Borg_05_88	Borgunfjord_2005	107	109	0	0	96	96	129	132	0	0	164	172	146	164	122	134	197	197	117	133	281	295	245	245	145	145	184	204	85	93	100	100	1
Borg_05_89	Borgunfjord_2005	117	119	192	192	96	104	126	129	115	119	172	196	152	152	116	128	197	197	117	133	271	271	245	245	151	151	132	138	89	89	100	100	1
Borg_05_90	Borgunfjord_2005	113	113	0	0	96	108	126	129	0	0	184	184	155	161	122	122	197	199	117	133	281	281	245	245	151	175	140	202	85	89	100	100	1
Borg_05_91	Borgunfjord_2005	107	113	192	196	96	96	126	126	115	141	156	156	146	149	125	125	197	211	117	117	287	337	239	241	167	173	148	172	93	93	100	100	1
Borg_05_92	Borgunfjord_2005	107	113	192	192	96	96	126	126	115	155	144	200	155	164	116	128	205	211	117	133	245	265	241	241	151	151	144	200	89	89	100	100	1
Borg_05_93	Borgunfjord_2005	109	113	192	192	96	96	132	132	143	157	172	204	155	167	122	140	205	205	117	133	251	265	241	249	141	157	188	190	85	89	100	100	2
Borg_05_94	Borgunfjord_2005	109	119	184	192	100	104	129	132	137	139	168	168	158	167	122	155	197	197	133	133	283	305	245	249	141	153	134	200	89	89	100	100	1
Borg_05_95	Borgunfjord_2005	111	113	192	192	96	96	132	135	121	137	184	188	152	155	116	122	207	209	117	117	269	281	239	245	143	161	150	186	89	93	100	100	1
Finn_07_229	Finnøy_2007	113	123	192	192	96	96	126	132	135	137	172	180	152	155	122	143	197	197	0	0	0	0	241	245	163	163	138	178	89	89	100	100	1
Finn_07_230	Finnøy_2007	113	119	180	192	92	92	126	138	125	141	160	164	155	158	143	149	197	211	0	0	0	0	241	245	147	163	184	190	89	89	100	100	1
Finn_07_231	Finnøy_2007	109	109	192	192	100	104	126	132	115	139	164	168	155	158	122	158	197	209	0	0	0	0	241	247	133	157	158	168	89	93	100	100	1
Finn_07_232	Finnøy_2007	107	113	192	192	96	100	138	138	115	125	152	176	146	149	152	164	207	209	0	0	0	0	243	243	149	159	134	202	89	93	100	100	1
Finn_07_233	Finnøy_2007	105	113	192	192	96	104	132	138	115	151	184	208	161	161	134	143	197	197	0	0	0	0	243	245	151	155	138	156	89	93	100	100	1
Finn_07_234	Finnøy_2007	109	119	192	192	100	100	126	132	115	135	196	200	152	158	125	125	197	197	0	0	0	0	239	239	141	169	136	198	93	93	100	100	1
Finn_07_235	Finnøy_2007	107	119	192	192	96	96	126	135	125	159	172	188	155	173	122	122	197	209	0	0	0	0	239	241	141	149	204	208	89	89	100	100	1
Finn_07_236	Finnøy_2007	117	119	192	192	92	100	123	123	115	141	148	172	149	152	116	122	207	211	0	0	0	0	243	249	157	165	132	192	89	89	100	100	1
Finn_07_237	Finnøy_2007	107	111	192	192	96	96	126	126	133	159	184	188	146	155	122	125	197	205	0	0	0	0	243	245	151	161	192	202	89	93	100	100	1
Finn_07_238	Finnøy_2007	109	119	192	192	96	112	129	141	125	155	164	196	146	146	131	146	197	197	0	0	0	0	239	241	151	153	184	196	0	0	100	100	1
Finn_07_239	Finnøy_2007	107	125	192	196	96	100	126	135	127	137	184	204	152	152	122	137	197	205	0	0	0	0	241	245	149	161	174	184	89	89	100	100	1
Finn_07_240	Finnøy_2007	107	119	188	192	92	96	126	129	135	135	156	200	146	155	116	146	207	207	0	0	0	0	243	245	157	163	136	178	85	85	100	100	1
Finn_07_241	Finnøy_2007	105	115	192	192	92	100	126	129	133	153	168	176	149	152	122	125	197	211	0	0	0	0	245	245	141	171	134	172	85	89	100	100	1
Finn_07_244	Finnøy_2007	105	111	192	192	92	96	123	126	143	143	172	172	155	164	125	140	197	197	0	0	0	0	241	243	131	153	170	194	85	89	100	100	1
Finn_07_245	Finnøy_2007	105	107	192	192	100	108	126	132	143	143	164	188	143	158	116	122	197	207	0	0	0	0	241	241	159	159	134	170	89	93	100	100	1
Finn_07_246	Finnøy_2007	107	113	192	196	96	96	135	150	115	147	184	192	149	152	149	158	207	209	0	0	0	0	239	241	133	153	152	198	89	89	100	100	1
Finn_07_247	Finnøy_2007	113	141	168	192	96	112	138	138	137	155	160	176	146	149	125	149	197	209	0	0	0	0	249	249	151	155	180	204	89	89	100	100	1
Finn_07_248	Finnøy_2007	107	107	192	192	92	96	126	132	115	139	0	0	152	167	122	125	197	197	0	0	0	0	245	249	141	151	134	198	89	89	100	100	1
Finn_07_249	Finnøy_2007	107	113	192	192	96	96	120	129	135	135	148	196	149	161	125	152	197	215	0	0	0	0	239	241	133	161	172	198	89	93	100	100	1
Finn_07_251	Finnøy_2007	113	113	184	192	92	100	135	141	115	143	188	192	152	170	125	149	197	197	0	0	0	0	239	241	153	169	132	162	85	85	100	100	1
Finn_07_252	Finnøy_2007	113	115	192	192	96	100	126	132	143	143	128	192	149	161	125	143	205	213	0	0	0	0	241	249	153	157	134	160	0	0	100	100	1
Finn_07_253	Finnøy_2007	113	113	192	192	96	104	129	129	115	119	160	160	152	158	134	140	197	209	0	0	0	0	241	241	169	171	134	148	93	93	100	100	1
Finn_07_254	Finnøy_2007	119	121	192	192	96	100	129	129	139	153	160	192	158	167	122	140	197	197	0	0	0	0	241	241	151	157	134	196	89	89	100	100	1
Finn_07_255	Finnøy_2007	107	109	192	192	96	112	126	129	125	141	148	184	149	164	143	152	197	197	0	0	0	0	241	241	145	145	186	188	89	89	100	100	1
Finn_07_256	Finnøy_2007	107	115	188	192	96	104	126	138	125	139	156	172	158	158	122	158	197	213	0	0	0	0	239	241	141	155	136	172	89	93	100	100	1
Finn_07_257	Finnøy_2007	141	141	192	192	96	96	129	135	115	133	164	192	152	158	122	128	197	197	0	0	0	0	245	247	167	173	136	192	85	89	100	100	1
Finn_07_258	Finnøy_2007	111	113	192	192	92	96	132	135	137	147	184	188	152	158	122	149	197	197	0	0	0	0	241	243	159	165	134	178	89	93	100	100	1
Finn_07_259	Finnøy_2007	107	113	188	206	96	96	126	129	145	155	188	192	152	170	113	149	197	197	0	0	0	0	239	245	145	173	188	198	89	89	100	100	1
Finn_07_260	Finnøy_2007	109	109	192	192	96	100	126	138	115	153	152	184	146	149	116	137	197	205	0	0	0	0	239	241	143	149	180	190	89	89	100	100	1
Finn_07_261	Finnøy_2007	113	141	192	192	88	96	132	135	149	149	156	180	146	164	140	143	207	207	0	0	0	0	239	241	141	169	134	190	89	89	100	100	1
Finn_07_262	Finnøy_2007	109	113	192	192	96	96	132	135	125	145	140	156	152	155	122	122	197	207	0	0	0	0	247	247	141	163	134	184	89	89	100	100	1
Finn_07_263	Finnøy_2007	107	107	192	192	96	96	126	129	115	119	148	184	146	146	122	158	197	197	0	0	0	0	241	245	143	159	188	190	89	89	100	100	1
Finn_07_264	Finnøy_2007	113	113	192	196	96	96	126	138	145	147	156	172	149	158	140	140	197	205	0	0	0	0	241	241	163	167	194	202	85	85	100	100	1
Lille_07_01	Lillesand_2007	107	115	192	192	0	0	0	0	135	139	180	184	146	155	125	134	197	211	117	133	265	267	241	241	139	169	188	206	85	85	100	100	1
Lille_07_02	Lillesand_2007	107	109	192	192	100	112	126	129	131	137	140	192	149	158	116	125	197	209	133	133	283	301	241	241	141	155	158	196	89	93	100	100	1
Lille_07_03	Lillesand_2007	109	117	192	192	96	100	126	126	115	125	148	168	149	170	116	149	197	205	117	117	269	273	241	243	147	159	134	200	89	89	100	100	1
Lille_07_04	Lillesand_2007	109	119	192	192	92	96	129	135	137	139	164	180	149	149	128	146	197	197	133	133	243	283	247	247	147	149	136	182	89	89	100	100	1
Lille_07_05	Lillesand_2007	109	119	192	196	0	0	0	0	133	153	160	204	149	152	122	149	197	197	117	133	285	299	241	243	141	169	134	212	81	81	100	100	1
Lille_07_06	Lillesand_2007	113	123	192	192	96	96	126	129	139	145	176	180	149	164	140	158	197	197	117	133	307	307	241	241	141	157	138	190	89	93	100	100	1
Lille_07_07	Lillesand_2007	107	111	192	192	92	96	123	132	139	141	128	180	146	149	149	155	197	197	133	133	263	273	243	243	141	169	176	184	93	93	100	100	1
Lille_07_08	Lillesand_2007	111	113	192	192	96	100	129	141	115	143	172	188	149	149	125	131	197	197	133	133	253	273	241	243	157	163	136	208	85	93	100	100	1
Lille_07_09	Lillesand_2007	105	109	192	192	104	112	129	132	139	145	160	172	146	155	116	116	197	207	117	133	243	259	241	241	141	161	192	202	89	89	100	100	1
Lille_07_10	Lillesand_2007	111	115	192	192	96	96	126	135	115	137	176	188	146	149	122	152	197	197	133	133	255	275	239	245	141	159	136	176	85	93	100	100	1
Lille_07_11	Lillesand_2007	109	113	192	192	0	0	0	0	115	137	176	192	149	158	122	149	213	215	133	133	243	263	245	245	151	157	134	176	89	89	100	100	1
Lille_07_12	Lillesand_2007	113	119	192	192	96	100	138	141	117	145	192	192	146	152	116	140	197	207	133	133	265	281	239	239	141	173	134	190	93	93	100	100	1
Lille_07_13	Lillesand_2007	107	113	188	192	96	96	129	138	145	147	144	164	158	158	122	143	197	197	117	133	243	281	245	245	163	169	134	136	89	93	100	100	1
Lille_07_15	Lillesand_2007	107	111	192	192	92	96	132	138	145	161	192	204	149	152	122	122	197	197	133	133	259	267	241	241	133	171	134	180	85	85	100	100	1
Lille_07_16	Lillesand_2007	111	113	184	192	96	100	129	138	125	149	188	192	146	173	125	152	197	197	117	133	267	277	247	249	145	167	134	200	89	93	100	100	1
Lille_07_17	Lillesand_2007	107	117	192	196	92	96	132	141	115	137	0	0	155	161	140	140	209	211	133	133	263	281	241	245	167	169	134	134	89	89	100	100	1
Lille_07_19	Lillesand_2007	107	109	192	192	96	104	126	129	137	139	204	208	146	161	116	146	205	205	117	133	255	301	245	245	169	169	134	202	85	89	100	100	1
Lille_07_20	Lillesand_2007	111	113	192	192	92	96	138	138	137	141	180	200	146	164	128	149	197	217	0	0	0	0	241	241	139	139	186	190	0	0	100	100	1
Lille_07_21	Lillesand_2007	119	119	188	192	96	100	126	135	137	137	180	196	158	170	116	140	0	0	133	133	293	323	245	245	139	161	134	190	89	89	100	100	1
Lille_07_22	Lillesand_2007	107	107	192	192	88	100	126	135	125	135	172	184	155	164	122	152	197	211	117	133	255	327	247	247	153	153	188	202	81	93	100	100	1
Lille_07_23	Lillesand_2007	109	111	192	192	96	112	126	135	115	159	188	204	152	164	125	143	197	211	133	133	255	269	247	249	137	157	134	198	89	93	100	100	1
Lille_07_24	Lillesand_2007	111	121	192	192	96	96	135	138	141	183	188	204	149	161	116	122	197	197	0	0	267	295	245	249	145	145	134	200	89	89	100	100	1
Lille_07_25	Lillesand_2007	107	139	192	192	92	96	129	135	141	143	184	208	155	170	122	125	197	209	133	133	271	275	241	241	153	157	192	212	89	89	100	100	1
Lille_07_27	Lillesand_2007	113	141	192	196	100	112	126	138	137	137	156	176	146	149	143	146	197	197	0	0	0	0	241	243	159	163	134	134	0	0	100	100	1
Lille_07_28	Lillesand_2007	113	113	192	192	92	96	126	132	121	143	156	176	149	149	122	128	197	197	0	0	0	0	241	241	151	155	134	136	0	0	100	100	1
Lille_07_29	Lillesand_2007	107	115	192	192	96	108	132	141	131	147	172	176	155	158	116	122	197	215	0	0	273	273	243	247	137	147	188	204	89	89	100	100	1
Lille_07_30	Lillesand_2007	105	119	192	192	96	96	129	138	115	143	184	204	152	164	110	122	197	209	117	133	307	309	241	245	147	155	134	208	93	93	100	100	1
Lille_07_31	Lillesand_2007	115	119	192	192	92	96	126	135	115	139	128	188	155	158	134	137	197	211	117	117	285	285	241	247	139	147	172	210	89	89	100	100	1
Lille_07_32	Lillesand_2007	107	119	192	192	96	96	129	129	137	137	196	212	149	155	122	134	197	197	133	133	243	255	241	241	149	151	194	200	85	101	100	100	1
Lille_07_33	Lillesand_2007	107	113	192	192	96	96	129	132	131	135	160	160	152	170	122	158	197	207	117	133	265	307	241	245	169	173	172	196	93	93	100	100	1
Lille_07_34	Lillesand_2007	107	117	160	192	96	100	135	135	141	147	160	160	161	164	146	155	197	197	117	133	263	299	245	247	141	141	178	210	89	89	100	100	1
Lille_07_35	Lillesand_2007	107	113	192	192	96	96	138	138	125	131	168	168	170	170	116	125	197	197	133	133	281	287	243	245	151	181	170	182	0	0	100	100	1
Lille_07_36	Lillesand_2007	111	123	192	192	96	96	132	138	115	135	172	204	152	164	122	125	197	197	117	133	263	273	243	243	151	153	136	200	97	97	100	100	1
Lille_07_37	Lillesand_2007	109	109	192	192	92	96	126	138	125	131	188	204	155	176	125	143	197	205	0	0	0	0	241	241	141	151	180	192	0	0	100	100	1
Lille_07_38	Lillesand_2007	107	113	192	192	96	96	126	132	143	161	184	188	146	149	140	143	197	197	133	133	269	285	239	239	145	167	138	176	89	89	100	100	1
Lille_07_39	Lillesand_2007	107	119	188	192	96	96	135	138	115	139	176	180	152	155	122	125	197	197	0	0	0	0	241	241	133	169	136	196	0	0	100	100	1
Lille_07_40	Lillesand_2007	107	109	192	192	92	96	135	135	131	143	184	192	152	155	122	161	197	207	117	133	277	295	0	0	163	169	174	200	85	93	100	100	1
Lille_07_41	Lillesand_2007	129	137	192	192	96	100	123	129	125	169	180	188	140	158	122	140	197	211	133	133	267	289	243	255	141	145	190	192	0	0	100	100	1
Lille_07_43	Lillesand_2007	113	113	192	192	96	100	132	132	137	139	160	164	143	161	140	155	197	207	0	0	0	0	241	245	151	153	134	202	0	0	100	100	1
Lille_07_45	Lillesand_2007	113	117	192	192	96	96	126	126	139	143	156	188	149	152	122	125	197	207	117	117	267	273	245	247	137	161	186	192	89	93	100	100	1
Lille_07_47	Lillesand_2007	111	113	192	192	96	96	123	126	117	125	140	188	146	149	140	146	207	207	117	133	271	285	239	243	163	163	136	208	89	89	100	100	1
Lille_07_48	Lillesand_2007	111	113	192	192	96	104	129	129	143	143	152	176	146	155	134	143	197	211	133	133	283	287	245	245	137	151	134	170	93	93	100	100	1
Lille_07_49	Lillesand_2007	111	117	192	192	96	96	132	135	123	139	156	168	149	164	116	146	197	197	133	133	253	275	241	243	155	163	142	200	85	89	100	100	1
Lille_07_50	Lillesand_2007	113	113	192	192	92	92	123	132	137	155	188	228	158	161	116	149	197	197	117	117	267	295	241	241	153	157	136	182	89	89	100	100	1
Lille_07_52	Lillesand_2007	105	115	192	192	100	100	126	126	115	133	160	188	146	164	131	134	197	197	117	133	265	311	239	239	141	151	136	186	85	85	100	100	1
Lille_07_53	Lillesand_2007	107	113	192	192	92	96	123	129	115	133	164	164	152	152	122	122	207	207	133	133	273	327	245	247	163	169	162	188	89	89	100	100	1
Lille_07_54	Lillesand_2007	115	119	192	192	96	96	129	138	115	139	176	200	155	164	116	140	197	197	133	133	269	285	241	245	141	159	136	190	0	0	100	100	1
Lille_07_55	Lillesand_2007	109	111	192	192	92	96	126	129	115	125	200	204	146	152	134	140	197	209	133	133	269	273	245	245	141	151	134	152	89	89	100	100	1
Lille_07_57	Lillesand_2007	111	113	192	192	84	84	126	126	115	137	164	176	143	155	125	158	197	197	133	133	263	305	247	247	141	157	176	196	93	93	100	100	1
Lille_07_58	Lillesand_2007	111	113	188	192	96	96	123	135	143	147	184	188	149	158	125	149	205	207	117	133	261	283	239	241	153	163	170	192	89	89	100	100	1
Lille_07_59	Lillesand_2007	107	113	192	192	96	100	129	138	115	129	144	192	149	161	134	134	197	197	133	133	243	285	245	245	133	141	134	136	89	93	100	100	1
Lille_07_60	Lillesand_2007	105	113	192	196	92	96	132	135	137	145	164	200	146	149	116	155	197	207	117	133	255	303	249	249	153	157	134	182	85	85	100	100	1
Lille_07_61	Lillesand_2007	105	107	192	196	92	96	129	129	139	169	184	204	146	161	125	125	207	207	0	0	267	279	241	249	159	165	186	192	0	0	100	100	1
Lille_07_62	Lillesand_2007	109	113	192	192	96	100	126	129	131	139	184	184	149	164	134	140	197	209	133	133	0	0	241	245	141	159	178	210	89	89	100	100	1
Lille_07_63	Lillesand_2007	111	113	192	192	96	96	123	138	115	131	128	168	149	149	122	149	197	215	133	133	287	287	245	245	151	171	156	174	89	93	100	100	2
Lille_07_64	Lillesand_2007	107	113	192	192	96	108	126	129	115	147	184	188	146	155	116	140	197	197	133	133	243	277	243	245	153	159	156	188	89	89	100	100	1
Lille_07_65	Lillesand_2007	111	119	184	192	96	96	132	153	133	145	164	172	149	152	128	155	197	197	117	133	283	297	241	241	151	169	188	200	89	89	100	100	1
Lille_07_66	Lillesand_2007	113	123	192	192	92	96	129	132	139	155	164	196	152	161	122	143	197	207	0	0	265	271	239	241	159	167	196	204	89	93	100	100	1
Lille_07_67	Lillesand_2007	109	111	192	192	96	112	126	141	115	115	172	188	152	152	122	122	197	209	117	133	251	269	239	241	163	173	140	186	89	93	100	100	1
Lille_07_68	Lillesand_2007	107	123	192	192	84	108	126	129	139	147	180	184	146	167	116	137	207	209	117	133	279	321	241	241	169	169	134	184	89	89	100	100	1
Lille_07_70	Lillesand_2007	105	109	192	192	92	100	135	135	123	147	140	184	155	167	116	134	197	209	0	0	277	283	249	249	145	145	188	196	0	0	100	100	1
Lille_07_71	Lillesand_2007	105	109	192	192	92	96	129	141	139	141	144	200	146	146	122	155	197	209	117	133	271	311	241	245	169	171	190	194	89	89	100	100	1
Lille_07_72	Lillesand_2007	109	113	192	192	96	108	126	129	125	143	164	192	146	155	122	146	197	207	117	133	265	273	241	247	157	157	190	192	85	89	100	100	1
Lille_07_73	Lillesand_2007	107	111	192	192	84	96	132	135	137	147	136	204	149	152	125	149	197	215	117	133	275	295	241	245	147	153	178	190	89	93	100	100	1
Lille_07_74	Lillesand_2007	107	113	188	192	92	100	129	141	115	137	196	204	155	158	116	122	197	197	133	133	261	267	241	245	141	163	134	178	89	93	100	100	1
Lille_07_75	Lillesand_2007	115	119	192	192	0	0	0	0	139	145	0	0	149	158	128	158	197	211	133	133	269	273	239	241	141	169	142	194	89	89	100	100	1
Lille_07_76	Lillesand_2007	107	115	192	192	96	100	129	132	141	143	168	180	146	149	116	122	197	211	117	133	271	279	241	243	133	155	136	200	89	89	100	100	1
Lille_07_77	Lillesand_2007	107	111	192	192	96	96	123	126	135	151	192	204	149	167	116	122	197	197	117	133	283	297	241	243	141	163	184	206	89	89	100	100	1
Lille_07_79	Lillesand_2007	109	119	192	192	92	92	129	132	115	125	208	208	155	158	122	122	197	207	133	133	263	295	241	241	163	169	160	190	93	93	100	100	1
Lille_07_80	Lillesand_2007	111	113	192	196	96	96	126	138	115	145	180	192	155	158	116	122	197	207	133	133	265	303	241	243	163	169	134	190	89	89	100	100	1
Lille_07_81	Lillesand_2007	113	115	192	196	96	104	126	138	151	163	156	172	146	164	116	152	197	197	117	133	283	301	241	243	159	163	172	204	93	93	100	104	1
Lille_07_82	Lillesand_2007	111	113	192	192	96	96	126	132	115	123	192	200	149	158	122	122	197	197	117	133	279	283	241	247	153	169	136	136	89	89	100	100	1
Lille_07_83	Lillesand_2007	107	111	192	192	96	96	123	135	115	169	180	204	161	164	116	125	197	197	0	0	267	281	241	245	141	145	134	198	89	89	100	100	1
Lille_07_84	Lillesand_2007	107	113	192	192	0	0	0	0	137	139	0	0	146	146	116	149	197	197	117	133	261	295	243	247	141	163	192	192	89	89	100	100	1
Lille_07_85	Lillesand_2007	107	113	192	192	96	100	126	129	135	145	176	188	146	173	134	143	207	207	117	117	263	297	241	247	157	169	190	190	89	93	100	100	1
Lille_07_86	Lillesand_2007	117	133	192	192	96	96	126	132	137	145	160	160	149	161	122	143	197	205	133	133	259	281	247	249	149	165	172	192	89	89	100	100	1
Lille_07_87	Lillesand_2007	107	107	192	192	92	104	126	138	131	159	160	204	152	158	122	122	197	207	117	133	243	283	241	241	159	169	138	204	85	93	100	100	1
Lille_07_88	Lillesand_2007	101	111	180	192	96	96	126	129	119	143	160	188	152	179	128	143	207	209	117	133	265	267	243	245	153	169	134	180	89	89	100	100	1
Lille_07_90	Lillesand_2007	109	115	192	192	96	100	132	132	115	147	180	184	152	158	128	134	197	197	133	133	263	297	245	245	147	157	136	160	93	93	100	100	1
Lille_07_91	Lillesand_2007	107	107	192	192	92	96	132	135	115	143	168	192	152	158	122	125	197	197	133	133	265	279	241	245	141	141	136	190	89	89	100	100	1
Ris_05_01	Risør_ytre_2005	105	109	192	192	96	96	126	132	115	149	172	188	164	173	125	125	206	211	133	133	247	265	241	241	141	151	134	184	89	89	100	100	1
Ris_05_02	Risør_ytre_2005	109	109	192	192	96	96	123	132	135	135	148	184	155	164	122	137	197	197	117	133	261	265	245	249	149	167	190	190	89	93	100	100	1
Ris_05_03	Risør_ytre_2005	105	111	196	196	92	100	117	126	115	137	168	188	149	155	125	137	197	197	117	117	277	337	243	247	149	149	134	182	89	89	100	100	1
Ris_05_06	Risør_ytre_2005	107	119	192	196	96	100	135	135	137	151	168	200	155	158	125	134	197	197	133	133	265	271	239	247	151	163	134	196	89	89	100	100	1
Ris_05_07	Risør_ytre_2005	107	133	192	192	96	96	132	132	135	147	188	204	152	152	134	155	197	209	117	133	265	301	239	245	151	161	136	178	89	89	100	100	1
Ris_05_08	Risør_ytre_2005	113	117	192	192	96	96	126	129	135	139	172	180	158	170	122	143	197	197	133	133	253	319	245	245	141	153	170	204	89	93	100	100	1
Ris_05_09	Risør_ytre_2005	107	119	192	192	96	96	126	126	115	145	180	184	152	155	122	134	197	197	117	121	259	293	241	241	133	141	136	188	89	93	100	100	1
Ris_05_10	Risør_ytre_2005	107	111	192	192	92	96	126	126	115	123	160	160	149	152	125	146	197	207	117	117	293	301	245	249	153	153	140	180	85	89	100	100	1
Ris_05_11	Risør_ytre_2005	115	123	192	192	96	96	129	135	145	147	0	0	152	161	122	149	209	209	117	117	261	295	249	249	149	149	172	208	89	93	100	100	1
Ris_05_12	Risør_ytre_2005	107	113	192	192	96	100	126	126	137	153	148	172	149	152	122	149	197	205	117	133	271	277	241	241	145	155	172	182	93	93	100	100	1
Ris_05_13	Risør_ytre_2005	103	119	192	192	96	96	126	138	137	143	160	180	155	155	122	128	205	209	117	117	263	267	241	245	163	163	158	198	93	93	100	100	1
Ris_05_14	Risør_ytre_2005	105	111	192	192	96	100	129	129	115	139	156	184	146	149	122	122	197	207	117	133	273	293	243	249	139	149	184	196	93	93	100	100	1
Ris_05_15	Risør_ytre_2005	109	109	192	192	84	96	126	135	137	145	184	188	161	170	116	125	207	207	117	133	269	309	243	243	155	165	136	206	89	101	100	100	1
Ris_05_16	Risør_ytre_2005	119	119	192	192	96	96	132	141	137	147	128	156	158	158	146	149	197	197	133	133	271	271	241	243	139	157	160	200	81	81	100	100	1
Ris_05_17	Risør_ytre_2005	111	115	192	196	92	96	126	138	115	137	140	172	149	149	122	125	197	197	133	133	269	279	239	245	145	163	134	200	81	93	100	100	1
Ris_05_18	Risør_ytre_2005	107	111	188	192	96	100	129	135	125	137	152	164	152	155	122	125	197	211	117	133	267	269	243	249	141	169	188	192	89	93	100	100	1
Ris_05_19	Risør_ytre_2005	113	113	192	192	92	96	135	135	115	151	180	180	164	164	143	146	201	207	117	133	249	267	241	241	157	163	176	204	85	93	100	100	1
Ris_05_20	Risør_ytre_2005	105	111	192	192	96	100	126	132	125	139	164	188	146	158	122	122	205	207	133	133	267	307	239	245	149	157	156	196	93	93	100	100	1
Ris_05_21	Risør_ytre_2005	107	111	192	192	96	112	123	123	115	139	176	196	149	152	122	140	197	197	117	133	283	283	241	247	153	163	134	136	93	93	100	100	1
Ris_05_22	Risør_ytre_2005	107	109	192	196	96	96	132	138	133	139	172	180	149	164	122	149	213	213	133	133	271	287	243	245	145	153	184	202	89	89	100	100	1
Ris_05_23	Risør_ytre_2005	105	129	192	192	96	96	135	135	115	143	164	192	155	158	122	143	211	211	117	117	273	297	241	241	141	157	194	206	93	93	100	100	1
Ris_05_24	Risør_ytre_2005	107	111	192	192	88	96	129	132	133	145	160	212	146	152	146	149	197	211	117	133	275	279	239	251	153	153	134	178	89	89	100	100	1
Ris_05_25	Risør_ytre_2005	107	115	192	192	96	104	126	138	135	137	148	196	149	155	116	122	197	197	117	133	273	273	0	0	179	187	174	204	89	89	100	100	1
Ris_05_26	Risør_ytre_2005	111	115	192	192	96	104	126	132	129	135	160	196	149	158	122	140	197	211	133	133	265	285	245	247	151	181	136	196	85	89	100	100	1
Ris_05_27	Risør_ytre_2005	107	111	192	196	96	96	126	126	135	143	116	168	149	158	116	143	197	207	117	117	243	313	245	245	147	173	134	194	85	101	100	100	1
Ris_05_28	Risør_ytre_2005	107	117	192	196	104	112	135	135	135	141	140	164	152	152	113	116	197	209	133	133	271	309	241	241	137	153	142	174	85	89	100	100	1
Ris_05_29	Risør_ytre_2005	113	139	192	196	96	108	129	129	125	125	184	196	149	155	122	143	197	211	117	133	261	265	241	241	141	187	192	202	89	97	100	100	1
Ris_05_30	Risør_ytre_2005	105	119	192	192	96	100	135	138	115	143	164	192	158	158	116	149	197	197	117	117	271	293	243	243	149	169	134	186	89	93	100	100	1
Ris_05_31	Risør_ytre_2005	113	113	192	192	96	96	126	132	117	125	156	172	152	161	143	149	197	209	117	117	269	287	241	241	141	141	182	196	85	101	100	100	1
Ris_05_32	Risør_ytre_2005	111	113	192	192	0	0	135	138	131	137	160	180	143	155	140	149	197	197	117	133	269	293	245	247	141	143	134	192	89	93	100	100	1
Ris_05_33	Risør_ytre_2005	105	117	192	192	96	96	132	135	145	145	164	172	155	158	113	125	197	207	117	133	281	289	239	247	141	155	136	190	81	93	100	100	1
Ris_05_34	Risør_ytre_2005	109	117	192	192	100	100	132	135	139	141	188	204	158	167	122	146	197	197	133	133	277	281	241	243	147	153	188	190	85	89	100	100	1
Ris_05_35	Risør_ytre_2005	113	113	192	192	100	104	120	132	139	147	176	196	167	173	134	137	205	209	117	117	285	321	241	245	141	155	192	202	89	89	100	100	1
Ris_05_36	Risør_ytre_2005	115	117	192	192	96	96	99	126	135	141	160	168	152	155	122	125	211	211	133	133	265	281	241	241	163	169	134	190	89	89	100	100	1
Ris_05_37	Risør_ytre_2005	111	111	192	192	96	96	132	132	137	137	176	184	149	152	122	128	197	209	133	133	271	273	239	243	159	169	172	188	89	101	100	100	1
Ris_05_38	Risør_ytre_2005	117	117	188	192	92	96	123	129	115	165	164	180	149	161	125	146	213	213	133	133	253	267	243	245	163	173	190	200	81	81	100	100	1
Ris_05_39	Risør_ytre_2005	0	0	192	192	100	104	126	126	125	125	176	184	149	164	122	152	211	211	117	117	275	281	239	243	163	165	134	192	93	93	100	100	1
Ris_05_40	Risør_ytre_2005	0	0	192	192	92	100	141	141	145	145	152	176	149	158	122	125	197	211	117	117	265	265	241	247	157	163	134	182	85	85	100	100	1
Ris_05_41	Risør_ytre_2005	107	113	192	196	92	96	129	132	139	141	188	220	140	146	122	149	197	209	117	133	259	285	239	241	141	141	170	196	85	89	100	100	1
Ris_05_42	Risør_ytre_2005	115	115	192	192	96	96	123	126	115	135	0	0	158	158	119	128	209	209	133	133	303	339	241	241	141	151	134	176	89	89	100	100	1
Ris_05_43	Risør_ytre_2005	109	111	188	192	96	100	126	129	123	139	0	0	146	161	122	164	197	197	133	133	261	275	239	241	159	159	190	194	89	93	100	100	1
Ris_05_44	Risør_ytre_2005	107	109	192	192	96	96	132	135	115	115	164	196	155	164	122	140	197	209	117	133	277	297	239	239	141	149	136	140	93	101	100	100	1
Ris_05_45	Risør_ytre_2005	111	111	192	192	96	100	135	138	129	137	168	168	149	164	137	146	207	213	117	133	265	287	243	243	141	151	176	188	89	89	100	100	1
Ris_05_46	Risør_ytre_2005	113	113	192	192	96	100	126	129	139	139	160	204	158	167	122	140	197	197	117	117	243	279	241	241	145	153	172	192	89	89	100	100	1
Ris_05_47	Risør_ytre_2005	119	127	192	192	92	96	126	135	115	137	172	184	146	155	122	152	197	207	133	133	267	299	241	241	169	173	176	190	89	89	100	100	1
Ris_05_48	Risør_ytre_2005	111	113	192	192	96	100	132	132	141	147	196	200	152	161	134	152	197	207	117	117	253	253	245	249	157	169	156	172	85	93	100	100	1
Ris_05_49	Risør_ytre_2005	115	115	192	192	92	108	132	138	121	139	0	0	152	167	122	122	197	207	117	133	253	273	241	241	145	157	136	140	89	93	100	100	1
Ris_05_50	Risør_ytre_2005	113	113	192	192	96	104	126	135	135	147	152	196	143	164	134	146	197	213	133	133	267	285	241	241	141	143	132	200	89	89	100	100	1
Ris_05_51	Risør_ytre_2005	109	109	192	192	96	112	126	126	115	125	176	176	155	158	122	152	205	207	133	133	301	343	243	243	141	169	176	206	89	93	100	100	1
Ris_05_52	Risør_ytre_2005	105	113	192	196	92	96	129	135	135	143	160	196	155	164	137	152	197	197	133	133	273	273	245	249	141	147	184	192	89	93	100	100	1
Ris_05_53	Risør_ytre_2005	107	115	192	192	96	96	126	126	135	143	168	176	137	173	125	134	197	207	117	133	265	343	243	243	167	169	136	178	85	93	100	100	1
Ris_05_54	Risør_ytre_2005	107	111	192	192	0	0	126	132	135	159	164	168	155	155	122	125	211	213	117	117	275	277	241	241	155	163	172	188	89	89	100	100	1
Ris_05_55	Risør_ytre_2005	107	111	192	192	92	100	126	132	115	117	172	204	155	164	122	146	197	197	133	133	265	267	239	243	157	159	156	176	93	93	100	100	1
Ris_05_56	Risør_ytre_2005	115	119	192	196	92	96	126	135	115	119	168	180	146	170	146	161	197	215	117	133	271	293	241	241	159	169	140	152	85	93	100	100	1
Ris_05_57	Risør_ytre_2005	117	117	192	192	96	104	126	126	115	115	188	196	158	167	122	122	197	197	133	133	291	297	241	245	141	147	136	136	89	89	100	100	1
Ris_05_58	Risør_ytre_2005	111	113	188	192	92	96	132	132	135	137	188	196	149	158	116	143	197	207	117	133	249	303	241	247	141	141	192	192	85	85	100	100	1
Ris_05_59	Risør_ytre_2005	111	123	192	192	0	0	126	129	115	137	160	176	161	170	116	143	197	209	133	133	275	301	241	245	157	169	134	136	89	89	100	100	1
Ris_05_60	Risør_ytre_2005	111	111	192	192	96	96	126	129	135	137	156	172	146	158	131	140	197	205	117	133	263	279	241	249	141	151	136	182	89	89	100	100	1
Ris_05_61	Risør_ytre_2005	105	119	192	192	100	100	135	138	125	157	148	208	161	161	125	146	197	197	117	133	267	275	241	241	151	179	134	172	89	89	100	100	1
Ris_05_62	Risør_ytre_2005	107	115	188	192	96	112	126	126	141	141	188	192	149	152	122	140	203	205	133	133	269	273	241	245	145	161	192	192	89	89	100	100	1
Ris_05_63	Risør_ytre_2005	111	113	192	192	96	96	135	135	133	145	160	180	146	161	146	155	197	205	133	133	295	361	241	245	143	143	168	188	81	85	100	100	1
Ris_05_64	Risør_ytre_2005	107	117	192	208	88	96	123	138	137	161	156	188	146	152	137	149	197	197	117	133	267	293	245	247	157	165	154	194	89	89	100	100	1
Ris_05_65	Risør_ytre_2005	111	113	192	192	92	96	129	129	139	145	164	164	152	167	116	146	197	211	117	117	277	289	243	243	155	171	142	192	89	93	100	100	1
Ris_05_66	Risør_ytre_2005	111	111	192	192	92	100	126	129	137	139	176	192	146	161	140	149	197	197	117	133	261	277	241	245	145	159	134	204	89	93	100	100	1
Ris_05_67	Risør_ytre_2005	107	107	192	192	92	96	132	138	115	129	164	192	155	161	143	158	197	197	133	133	275	299	247	247	147	165	134	184	85	89	100	100	1
Ris_05_68	Risør_ytre_2005	111	113	192	192	92	92	132	135	125	141	180	188	149	158	116	158	207	209	117	117	281	283	245	245	157	169	170	198	89	89	100	100	1
Ris_05_69	Risør_ytre_2005	105	105	192	192	96	104	126	153	137	145	188	200	149	149	137	149	205	207	117	117	273	287	239	249	141	157	190	202	89	89	100	100	1
Ris_05_70	Risør_ytre_2005	107	109	192	192	92	100	132	138	135	139	160	172	164	179	122	122	197	207	117	117	279	287	243	243	151	159	134	192	85	93	100	100	1
Ris_05_71	Risør_ytre_2005	111	111	192	192	96	96	132	132	145	165	176	180	152	158	125	125	197	209	133	133	253	297	239	239	133	159	192	192	89	89	100	100	1
Ris_05_72	Risør_ytre_2005	0	0	192	192	92	96	126	129	139	145	156	180	152	161	116	122	197	205	133	133	265	277	239	239	141	169	134	172	85	89	100	100	1
Ris_05_73	Risør_ytre_2005	107	119	192	192	88	92	129	129	137	141	184	200	145	155	122	143	197	211	117	117	243	301	239	239	141	163	134	194	89	93	100	100	1
Ris_05_74	Risør_ytre_2005	105	129	192	192	96	96	99	99	137	151	160	188	143	164	116	122	197	205	117	133	249	257	241	241	147	163	184	194	89	93	100	100	1
Ris_05_77	Risør_ytre_2005	111	111	192	192	96	108	132	138	139	153	0	0	146	161	128	155	197	197	117	133	267	307	241	241	141	149	174	186	93	93	100	100	1
Ris_05_78	Risør_ytre_2005	115	119	188	192	96	104	126	132	133	139	160	160	155	158	134	143	197	197	133	133	269	301	239	239	137	153	134	196	89	93	100	100	1
Ris_05_79	Risør_ytre_2005	117	119	192	192	96	96	123	126	137	151	200	208	146	155	122	143	197	197	117	133	261	277	239	241	155	159	134	196	89	89	100	100	1
Ris_05_80	Risør_ytre_2005	107	113	192	192	96	104	135	138	135	137	172	176	155	161	122	152	197	197	117	133	285	303	241	241	151	159	186	188	85	93	100	100	1
Ris_05_81	Risør_ytre_2005	107	113	192	192	92	108	126	135	115	115	148	168	146	149	128	158	197	215	133	133	251	259	241	241	169	169	134	136	89	89	100	100	1
Ris_05_82	Risør_ytre_2005	107	107	192	192	96	100	126	138	115	155	168	188	146	158	116	125	197	213	117	133	261	263	241	241	147	169	136	192	85	89	100	100	1
Ris_05_83	Risør_ytre_2005	109	113	192	192	96	96	138	141	137	153	172	184	149	170	116	125	197	211	133	133	253	291	243	249	133	153	194	196	89	89	100	100	1
Ris_05_84	Risør_ytre_2005	109	109	192	192	96	104	126	129	115	115	180	204	146	158	116	125	197	205	117	133	265	283	241	245	133	157	134	202	85	93	100	100	1
Ris_05_85	Risør_ytre_2005	105	107	192	192	96	96	129	129	141	155	176	196	146	152	122	143	197	207	117	133	277	299	245	245	161	165	142	172	89	93	100	100	1
Ris_05_88	Risør_ytre_2005	0	0	192	192	96	100	138	138	131	139	168	196	152	155	122	140	197	197	117	133	265	313	241	245	141	169	172	192	89	89	100	100	1
Ris_05_89	Risør_ytre_2005	115	115	192	192	96	96	123	132	115	143	0	0	155	158	122	146	197	197	117	117	249	255	243	245	139	169	188	198	89	93	100	104	1
Ris_05_91	Risør_ytre_2005	105	105	192	192	96	96	129	129	133	135	156	160	155	158	125	149	197	197	117	133	263	269	247	247	141	141	190	190	89	89	100	100	1
Ris_05_92	Risør_ytre_2005	107	109	192	192	96	104	123	138	135	139	156	160	149	152	110	122	197	197	117	133	269	275	241	249	155	163	136	204	89	89	100	100	1
Ris_05_95	Risør_ytre_2005	115	117	192	192	92	96	132	138	137	157	0	0	146	161	128	140	197	207	117	133	263	273	241	245	139	167	182	196	89	89	100	100	1
Oslof_05_01	Oslofjord_2005	105	107	192	192	96	100	132	138	115	145	176	180	152	155	122	128	197	205	117	117	243	301	241	241	141	157	154	190	89	89	100	100	1
Oslof_05_02	Oslofjord_2005	107	123	192	192	96	112	126	132	137	159	156	180	155	158	122	122	197	209	117	133	291	299	241	243	163	169	134	202	93	93	100	100	1
Oslof_05_04	Oslofjord_2005	109	111	188	192	96	96	126	132	115	137	192	192	149	161	146	152	197	197	117	133	267	267	241	249	133	151	134	136	0	0	100	100	1
Oslof_05_05	Oslofjord_2005	109	109	192	192	100	100	126	132	117	139	160	204	158	158	116	158	197	197	117	133	243	269	241	249	157	157	172	178	0	0	100	100	1
Oslof_05_06	Oslofjord_2005	107	113	192	192	96	104	123	129	115	143	160	208	164	167	146	152	197	197	117	133	291	297	239	247	163	169	136	174	93	93	100	100	1
Oslof_05_09	Oslofjord_2005	105	121	192	192	96	96	126	138	133	137	160	188	161	164	125	152	197	207	133	133	253	281	241	245	141	145	186	194	89	97	100	100	1
Oslof_05_10	Oslofjord_2005	113	115	192	192	92	96	138	141	115	143	164	192	146	164	122	122	209	215	117	133	281	283	241	243	141	147	142	176	93	93	100	100	1
Oslof_05_11	Oslofjord_2005	119	141	192	192	96	96	129	141	115	139	156	204	146	158	116	116	205	205	133	133	265	279	241	243	163	169	134	134	0	0	100	100	1
Oslof_05_12	Oslofjord_2005	113	119	192	192	96	96	123	138	135	139	128	184	161	167	125	131	197	197	133	133	269	301	241	245	161	169	190	194	89	89	100	100	1
Oslof_05_13	Oslofjord_2005	109	139	192	192	84	100	126	132	137	143	144	164	146	167	125	140	197	197	117	133	259	273	243	247	141	169	134	134	89	89	100	100	1
Oslof_05_14	Oslofjord_2005	113	113	192	196	96	96	132	141	133	139	176	188	152	155	140	152	197	215	117	133	283	283	245	245	147	165	170	190	89	93	100	100	1
Oslof_05_15	Oslofjord_2005	109	119	192	192	96	104	129	135	137	137	160	168	161	173	122	146	197	209	133	133	243	243	241	243	131	141	186	190	0	0	100	100	1
Oslof_05_17	Oslofjord_2005	119	119	188	192	104	108	123	126	115	135	172	204	149	149	116	122	197	197	117	133	277	291	243	245	163	169	178	190	89	89	100	100	1
Oslof_05_18	Oslofjord_2005	107	119	192	192	92	96	129	141	131	137	140	204	158	164	122	122	197	197	117	117	261	269	0	0	159	175	134	160	0	0	100	100	1
Oslof_05_20	Oslofjord_2005	107	119	192	208	96	96	129	138	115	157	164	176	152	155	116	152	197	209	117	133	269	277	241	241	165	169	136	136	0	0	100	100	1
Oslof_05_21	Oslofjord_2005	107	119	192	192	96	96	126	141	115	137	156	176	152	155	143	146	197	197	117	133	263	277	241	247	141	171	134	134	0	0	100	100	1
Oslof_05_22	Oslofjord_2005	109	119	192	192	96	96	132	138	137	155	160	208	155	158	122	122	197	209	117	133	259	259	241	245	157	169	136	194	0	0	100	100	1
Oslof_05_23	Oslofjord_2005	107	111	192	192	92	96	126	129	115	143	196	200	155	161	116	128	197	209	117	133	271	307	243	245	153	173	162	190	89	89	100	100	1
Oslof_05_24	Oslofjord_2005	0	0	192	196	100	112	126	138	115	135	160	168	143	173	116	122	197	211	117	133	267	269	241	243	149	163	140	184	0	0	100	100	1
Oslof_05_25	Oslofjord_2005	107	121	192	192	96	100	126	135	115	139	164	188	155	164	122	137	207	209	117	133	269	269	239	249	141	169	188	200	89	89	100	100	1
Oslof_05_26	Oslofjord_2005	107	109	192	192	96	96	129	129	115	135	168	172	149	149	122	134	197	197	133	133	289	291	241	245	145	163	136	190	93	93	100	100	1
Oslof_05_27	Oslofjord_2005	109	111	192	192	100	108	129	135	115	137	160	176	149	155	116	140	197	201	133	133	297	297	239	241	135	153	134	188	0	0	100	100	1
Oslof_05_28	Oslofjord_2005	107	109	192	192	96	96	129	132	131	143	148	168	158	161	122	143	197	197	133	133	265	299	241	241	151	169	172	192	89	93	100	100	1
Oslof_05_29	Oslofjord_2005	109	111	192	192	92	96	135	135	115	145	168	168	146	155	122	134	197	197	133	133	259	263	241	245	159	169	136	196	81	89	100	100	1
Oslof_05_30	Oslofjord_2005	107	107	192	196	96	96	132	141	145	147	160	188	155	164	137	146	197	207	133	133	235	235	241	241	131	143	172	190	89	89	100	100	1
Oslof_05_31	Oslofjord_2005	105	105	192	192	92	92	123	126	115	135	176	176	152	158	116	122	197	207	117	133	255	293	245	245	159	163	136	202	0	0	100	100	1
Oslof_05_32	Oslofjord_2005	119	119	192	192	96	100	123	129	115	139	188	196	155	158	116	140	197	207	133	133	271	277	241	243	145	169	134	188	89	93	100	100	1
Oslof_05_33	Oslofjord_2005	113	117	192	196	84	96	126	132	143	145	192	192	164	179	134	146	197	197	133	133	269	281	241	247	169	181	194	198	89	93	100	100	1
Oslof_05_34	Oslofjord_2005	105	107	192	192	96	104	135	141	115	141	196	204	149	158	116	146	197	207	117	117	267	339	241	241	141	169	136	192	89	89	100	100	1
Oslof_05_35	Oslofjord_2005	107	111	192	192	96	100	123	138	125	145	160	184	152	161	122	143	197	197	133	133	265	265	0	0	163	173	136	164	89	89	100	100	1
Oslof_05_36	Oslofjord_2005	107	107	192	192	96	96	126	132	115	129	176	192	149	149	116	146	197	197	133	133	257	275	241	241	161	163	134	134	89	93	100	100	1
Oslof_05_37	Oslofjord_2005	107	113	192	196	96	100	126	129	119	119	192	196	152	155	122	122	197	209	117	133	263	263	239	253	137	145	176	176	89	89	100	100	1
Oslof_05_38	Oslofjord_2005	113	119	192	192	96	112	123	126	135	147	160	180	152	176	116	125	197	205	133	133	313	315	241	245	141	173	172	182	89	97	100	100	1
Oslof_05_39	Oslofjord_2005	109	111	192	192	104	112	126	135	139	145	156	188	149	149	125	140	197	207	117	133	265	287	241	241	153	167	134	192	89	89	100	100	1
Oslof_05_40	Oslofjord_2005	105	107	192	192	92	104	126	129	137	141	160	188	158	167	125	146	197	207	117	133	269	275	241	247	157	169	136	172	0	0	100	100	1
Oslof_05_41	Oslofjord_2005	113	113	192	192	96	108	123	129	115	135	188	204	146	155	134	149	197	207	117	117	271	271	245	245	141	169	176	192	93	93	100	100	1
Oslof_05_42	Oslofjord_2005	109	117	192	192	92	96	138	141	139	143	160	184	161	164	116	125	197	197	117	133	251	277	241	245	155	169	134	136	85	93	100	100	1
Oslof_05_43	Oslofjord_2005	107	119	192	192	92	96	126	129	135	145	168	168	146	170	125	125	211	211	117	133	285	287	245	247	147	163	172	200	89	89	100	100	1
Oslof_05_44	Oslofjord_2005	113	117	192	192	84	96	126	122	115	123	184	204	149	164	116	122	197	197	133	133	265	269	241	241	147	163	134	182	93	93	100	100	1
Oslof_05_45	Oslofjord_2005	111	113	192	192	92	96	120	138	115	137	164	196	152	158	122	143	197	209	133	133	269	269	243	247	131	169	136	192	0	0	100	100	1
Oslof_05_46	Oslofjord_2005	115	117	192	192	92	100	135	141	115	115	180	192	149	155	116	134	197	211	133	133	269	297	239	239	149	149	136	138	89	93	100	100	1
Oslof_05_47	Oslofjord_2005	105	107	192	196	96	112	126	135	115	115	148	148	146	158	116	122	197	215	117	133	277	279	241	247	137	141	150	186	89	89	100	100	1
Oslof_05_48	Oslofjord_2005	105	119	192	192	92	92	126	126	137	147	180	200	146	164	116	116	197	197	117	133	275	299	245	249	149	169	192	200	0	0	100	100	2
Oslof_05_49	Oslofjord_2005	107	119	192	192	92	96	123	135	115	115	164	204	155	161	122	143	197	207	133	133	253	273	241	243	133	145	136	136	85	89	100	100	1
Oslof_05_50	Oslofjord_2005	105	119	192	192	96	96	126	132	115	141	160	192	149	158	116	128	197	197	133	133	279	281	245	245	149	153	136	178	93	93	100	100	2
Oslof_05_51	Oslofjord_2005	107	113	192	192	96	96	123	129	143	147	192	204	155	158	122	137	197	207	133	133	327	329	241	241	163	169	134	186	89	89	100	100	1
Oslof_05_52	Oslofjord_2005	107	111	188	192	92	92	123	138	125	139	176	192	164	164	137	137	197	207	133	133	267	277	239	249	157	159	134	168	89	93	100	100	1
Oslof_05_53	Oslofjord_2005	107	111	192	192	100	112	126	135	0	0	148	204	152	158	122	122	197	209	117	117	267	271	241	249	141	149	134	198	89	89	100	100	1
Oslof_05_55	Oslofjord_2005	107	107	192	192	92	96	129	129	115	137	160	172	158	164	119	146	197	207	117	117	277	309	241	241	153	157	136	188	89	89	100	100	1
Oslof_05_56	Oslofjord_2005	113	119	192	192	96	104	129	138	115	141	184	192	146	149	125	143	197	197	133	133	255	265	241	245	141	141	156	174	93	93	100	100	1
Oslof_05_57	Oslofjord_2005	115	141	192	192	84	96	141	141	139	139	172	188	146	158	137	152	207	217	133	133	281	281	241	247	161	163	132	192	89	93	100	100	1
Oslof_05_58	Oslofjord_2005	121	121	192	192	96	96	126	138	115	125	196	204	146	158	122	146	197	207	133	133	265	285	241	243	161	169	162	190	93	93	100	100	1
Oslof_05_59	Oslofjord_2005	115	119	192	196	96	96	129	138	115	145	148	172	149	161	122	125	207	211	117	133	265	281	239	241	157	159	136	192	89	89	100	100	1
Oslof_05_60	Oslofjord_2005	109	109	192	192	96	100	135	138	115	143	156	160	155	173	140	143	197	205	133	133	275	277	241	247	157	163	136	190	93	93	100	100	1
Oslof_05_61	Oslofjord_2005	107	135	192	192	96	104	129	132	115	125	188	204	143	173	116	122	197	197	133	133	285	293	241	245	169	169	170	192	0	0	100	100	1
Oslof_05_62	Oslofjord_2005	107	117	192	192	96	100	129	129	115	119	160	196	146	152	116	146	197	197	133	133	269	283	241	241	147	169	134	176	89	93	100	100	1
Oslof_05_63	Oslofjord_2005	115	115	192	192	96	100	132	135	115	141	164	176	152	152	116	134	189	197	117	117	267	271	245	249	149	179	156	192	85	93	100	100	1
Oslof_05_64	Oslofjord_2005	107	115	192	196	92	96	126	129	115	139	160	204	152	158	125	140	197	207	133	133	325	327	241	245	153	163	136	178	89	89	100	100	1
Oslof_05_65	Oslofjord_2005	113	119	192	192	96	100	132	135	115	135	160	188	164	170	110	128	197	207	133	133	249	295	241	243	133	141	136	208	89	93	100	100	1
Oslof_05_66	Oslofjord_2005	111	121	192	192	96	96	126	126	147	149	172	192	158	161	116	122	205	211	117	133	265	283	245	247	147	163	172	176	89	89	100	100	1
Oslof_05_67	Oslofjord_2005	107	113	192	196	96	100	123	132	115	143	160	168	149	152	122	122	197	207	133	133	253	295	241	241	133	169	134	198	89	89	100	100	1
Oslof_05_68	Oslofjord_2005	109	113	192	196	96	96	129	129	115	137	148	176	152	158	116	131	207	209	133	133	249	313	243	243	145	155	136	186	85	93	100	100	1
Oslof_05_69	Oslofjord_2005	107	107	192	192	92	96	126	126	115	125	172	176	149	155	122	122	197	197	133	133	251	259	241	247	141	169	158	190	85	85	100	100	1
Oslof_05_70	Oslofjord_2005	107	107	192	192	96	112	123	123	115	137	156	168	143	152	122	125	197	197	117	133	259	273	245	251	141	153	172	192	89	89	100	100	1
Oslof_05_71	Oslofjord_2005	107	107	192	192	96	100	126	126	115	115	192	204	155	161	131	146	197	197	133	133	279	279	243	243	169	169	140	182	89	93	100	100	1
Oslof_05_72	Oslofjord_2005	109	117	192	196	92	92	123	129	107	115	164	204	152	152	116	158	197	197	117	117	267	273	239	245	151	169	136	192	89	89	100	100	1
Oslof_05_73	Oslofjord_2005	107	113	192	196	96	96	132	141	115	125	164	172	152	167	143	158	197	201	133	133	265	265	239	245	133	175	136	186	89	93	100	100	1
Oslof_05_74	Oslofjord_2005	105	113	192	192	96	108	132	138	125	133	204	204	149	161	122	149	197	197	117	133	253	257	239	249	145	163	136	186	93	93	100	100	1
Oslof_05_75	Oslofjord_2005	111	113	192	192	96	100	123	135	129	131	160	160	149	158	140	152	197	209	117	133	293	293	241	243	141	151	136	208	93	93	100	100	1
Oslof_05_76	Oslofjord_2005	107	115	192	192	92	96	0	0	125	137	0	0	152	161	116	125	197	197	117	133	281	281	239	239	151	151	186	194	89	89	100	100	1
Oslof_05_77	Oslofjord_2005	107	111	192	192	96	100	135	138	121	143	180	192	158	158	122	140	197	197	133	133	263	263	239	243	141	169	172	180	89	93	100	100	1
Oslof_05_78	Oslofjord_2005	107	111	192	192	96	96	123	132	137	145	192	192	158	167	116	122	197	213	117	133	269	291	245	249	145	171	148	206	0	0	100	100	1
Oslof_05_79	Oslofjord_2005	107	113	192	192	92	96	126	126	115	125	160	200	152	155	122	137	197	197	117	133	267	277	241	241	131	157	160	176	89	89	100	100	1
Oslof_05_80	Oslofjord_2005	107	117	192	192	96	96	129	132	115	133	180	184	155	161	122	140	197	211	117	133	261	271	241	241	147	169	174	178	89	89	100	100	1
Oslof_05_81	Oslofjord_2005	107	113	192	192	96	96	132	135	139	145	168	172	149	161	116	122	197	197	133	133	299	301	241	245	141	153	156	172	89	93	100	100	1
Oslof_05_82	Oslofjord_2005	107	115	192	192	100	112	123	123	115	137	176	176	152	152	116	125	197	209	117	117	247	247	243	245	163	173	184	192	89	93	100	100	1
Oslof_05_83	Oslofjord_2005	107	119	192	192	96	96	126	138	115	115	172	180	149	155	146	149	197	207	117	133	255	265	239	241	153	169	162	174	0	0	100	100	1
Oslof_05_85	Oslofjord_2005	107	117	192	192	96	108	126	141	115	135	180	192	143	161	122	158	207	207	117	133	263	275	239	243	161	161	134	136	89	89	100	100	1
Oslof_05_86	Oslofjord_2005	107	107	192	192	92	96	126	135	125	133	164	172	164	164	128	134	197	207	117	133	263	279	241	249	141	143	134	134	89	89	100	100	1
Oslof_05_87	Oslofjord_2005	113	119	192	192	96	96	126	138	115	125	172	184	152	161	122	128	197	197	117	133	269	287	243	245	165	175	134	134	93	93	100	100	1
Oslof_05_88	Oslofjord_2005	107	113	192	192	92	96	129	141	115	135	164	204	155	158	122	125	197	209	117	117	293	293	241	241	149	153	136	140	0	0	100	100	1
Oslof_05_89	Oslofjord_2005	107	113	192	192	96	96	135	138	137	145	176	176	152	161	116	137	197	207	133	133	265	271	243	249	145	163	134	192	89	93	100	100	1
Oslof_05_90	Oslofjord_2005	105	117	192	192	96	100	126	126	115	121	180	184	167	167	134	143	197	197	133	133	257	261	239	239	157	163	172	184	0	0	100	100	1
Oslof_05_91	Oslofjord_2005	107	111	192	196	96	100	123	132	137	145	160	160	149	161	134	149	197	207	133	133	267	273	239	245	149	157	136	178	89	93	100	100	1
Oslof_05_92	Oslofjord_2005	113	119	192	192	96	112	126	132	115	115	132	204	149	167	125	146	197	207	133	133	255	285	243	243	153	169	134	174	93	93	100	100	1
Oslof_05_93	Oslofjord_2005	107	107	192	192	96	100	126	129	115	125	168	176	146	146	122	134	197	209	133	133	245	269	239	243	157	163	134	136	89	89	100	100	1
Oslof_05_94	Oslofjord_2005	105	105	188	192	100	104	135	135	115	143	204	204	152	161	122	134	197	197	117	133	259	271	245	245	141	159	138	194	89	89	100	100	1

## Sheet: Pan I BB_Otoliths 4 and 5
ID	Population	Gmo2_a	Gmo2_b	Gmo3_a	Gmo3_b	Gmo34_a	Gmo34_b	Gmo35_a	Gmo35_b	Gmo132_a	Gmo132_b	Tch11_a	Tch11_b	PanI_a	PanI_b	Otolith type
Smor_02_31	Smørfjord_2002	109	109	192	192	96	100	126	132	117	125	140	176	104	104	5
Smor_02_48	Smørfjord_2002	109	109	192	192	96	96	129	138	115	121	184	184	104	104	5
Smor_02_55	Smørfjord_2002	113	119	192	192	96	96	129	129	115	123	156	184	104	104	5
Smor_02_57	Smørfjord_2002	115	119	192	192	96	96	132	132	115	115	168	184	104	104	5
Mag_02_01	Magerøysundet_2002	107	119	192	192	96	104	126	129	115	127	180	212	104	104	4
Vega_02_23	Vega_2002	107	111	192	196	96	96	132	138	115	159	156	196	104	104	4
Vega_02_50	Vega_2002	109	109	188	192	96	96	132	132	115	119	168	192	104	104	4
Aus_02_25	Austnesfjord_2002	107	143	192	196	96	96	126	129	115	115	164	180	104	104	5
Aus_02_26	Austnesfjord_2002	113	139	192	192	96	96	126	129	115	117	172	184	104	104	5
Aus_02_32	Austnesfjord_2002	105	105	192	192	96	96	129	135	117	117	0	0	104	104	5
Aus_02_40	Austnesfjord_2002	119	119	192	192	96	96	126	135	115	115	172	196	104	104	5
Aus_02_43	Austnesfjord_2002	107	113	192	192	96	96	138	138	115	119	156	196	104	104	5
Aus_02_45	Austnesfjord_2002	113	119	192	196	96	96	126	132	117	121	140	168	104	104	5
Aus_02_47	Austnesfjord_2002	109	119	192	192	96	96	126	126	115	115	164	192	104	104	5
Aus_02_48	Austnesfjord_2002	115	117	192	192	96	96	135	138	115	115	168	176	104	104	5
Aus_02_49	Austnesfjord_2002	109	125	192	192	96	96	123	135	115	115	180	184	104	104	5
Aus_02_53	Austnesfjord_2002	107	107	192	192	96	96	123	126	115	123	148	180	104	104	5
Aus_02_75	Austnesfjord_2002	113	119	188	192	96	96	126	129	115	115	176	188	104	104	5
Aus_02_80	Austnesfjord_2002	107	119	0	0	96	96	0	0	115	115	0	0	104	104	5
Smor_03_27	Smørfjord_2003	105	105	192	192	96	96	126	135	115	119	180	216	104	104	5
Smor_03_47	Smørfjord_2003	109	125	192	192	96	96	129	132	0	0	164	200	104	104	5
Smor_03_49	Smørfjord_2003	111	111	192	192	96	96	132	135	115	115	156	172	104	104	4
Smor_03_83	Smørfjord_2003	115	117	192	192	96	96	123	132	115	115	180	192	104	104	4
Repp_03_78	Repparfjord_2003	107	113	192	192	96	96	126	135	115	115	160	176	104	104	5
Smol_03_469	Smøla_2003	107	121	192	192	96	96	126	135	115	115	164	180	104	104	5
Borg_04_28	Borgunfjord_2004	113	117	192	192	96	96	129	132	115	119	156	188	104	104	4
Borg_04_33	Borgunfjord_2004	107	113	192	192	96	96	129	135	125	125	172	196	104	104	4
Borg_04_144	Borgunfjord_2004	107	109	180	192	96	96	123	123	115	115	156	164	104	104	5
Godo_04_01	Godøy_2004	109	111	192	192	96	96	138	138	115	115	172	192	104	104	4
Godo_04_03	Godøy_2004	113	113	192	206	96	96	126	132	115	115	184	200	104	104	5
Godo_04_29	Godøy_2004	119	119	192	192	96	96	129	129	115	115	156	168	104	104	5
Godo_04_33	Godøy_2004	107	107	192	192	96	96	126	135	115	115	176	188	104	104	5
Godo_04_41	Godøy_2004	107	109	192	192	96	96	132	135	115	115	172	192	104	104	4
Godo_04_55	Godøy_2004	105	113	192	196	96	96	126	132	115	121	172	196	104	104	5
Godo_04_62	Godøy_2004	107	113	192	192	96	96	129	132	115	117	188	188	104	104	5
Godo_04_76	Godøy_2004	107	113	192	192	96	96	129	132	115	115	164	184	104	104	5
Godo_04_77	Godøy_2004	107	109	192	192	96	96	126	135	111	121	156	176	104	104	4
Godo_04_81	Godøy_2004	107	113	192	192	96	96	126	126	115	115	176	196	104	104	5
Godo_04_82	Godøy_2004	107	115	192	192	96	96	138	138	115	123	164	176	104	104	5
Buag_04_01	Buagrunn_2004	109	109	192	192	96	96	129	132	115	115	176	204	104	104	4
Buag_04_02	Buagrunn_2004	109	109	192	208	96	96	126	126	115	119	172	188	104	104	5
Buag_04_05	Buagrunn_2004	105	109	192	196	96	96	138	141	115	119	176	196	104	104	5
Buag_04_10	Buagrunn_2004	113	141	200	200	96	96	126	135	115	123	160	188	104	104	5
Buag_04_14	Buagrunn_2004	105	111	192	192	96	96	126	135	115	115	180	192	104	104	5
Buag_04_21	Buagrunn_2004	107	107	192	192	96	96	123	129	115	121	180	200	104	104	5
Buag_04_24	Buagrunn_2004	109	117	192	192	96	96	126	129	115	115	160	176	104	104	4
Buag_04_26	Buagrunn_2004	105	107	192	192	96	96	126	129	115	119	140	200	104	104	4
Buag_04_28	Buagrunn_2004	107	123	192	192	96	104	126	135	119	121	192	200	104	104	5
Buag_04_30	Buagrunn_2004	109	111	192	192	96	96	132	138	115	115	164	168	104	104	4
Buag_04_52	Buagrunn_2004	105	113	192	192	96	96	135	141	115	119	180	184	104	104	4
Buag_04_53	Buagrunn_2004	107	113	192	192	0	0	126	132	115	115	156	180	104	104	5
Buag_04_57	Buagrunn_2004	109	113	184	192	96	96	126	135	115	121	164	180	104	104	5
Hopen_04_01	Saltenfjord_Hopen_2004	107	107	192	192	96	96	123	141	115	119	160	180	104	104	5
Hopen_04_53	Saltenfjord_Hopen_2004	109	109	192	192	96	96	126	132	115	119	172	184	104	104	4
Balkj_04_45	Baldkjosen_Nordfolda_2004	105	143	192	192	96	96	129	138	115	115	188	192	104	104	5
Eids_04_86	Eidsfjord_2004	109	113	192	192	96	96	126	129	115	121	144	188	104	104	5
Eids_04_88	Eidsfjord_2004	113	113	192	192	96	96	126	126	115	119	180	192	104	104	5
SkjerN_05_59	Skjerstadfjord_Valnesfjord_2005	109	119	192	192	96	96	132	132	119	119	148	196	104	104	4
Borg_05_03	Borgunfjord_2005	109	109	192	192	96	96	126	129	121	135	152	200	104	104	4
Borg_05_18	Borgunfjord_2005	107	113	192	192	96	96	129	138	115	115	200	200	104	104	5
Kans_06_11	Kanstadfjord_2006	107	113	192	192	96	96	132	135	115	119	192	192	104	104	5
Kans_06_24	Kanstadfjord_2006	107	109	192	192	96	96	135	138	115	117	176	188	104	104	4
Kans_06_52	Kanstadfjord_2006	105	107	192	192	96	96	129	135	115	119	188	188	104	104	4
Valb_06_06	Valberg_2006	109	111	180	192	96	96	132	138	115	115	160	172	104	104	5
Valb_06_10	Valberg_2006	109	109	192	192	96	96	126	135	107	115	156	208	104	104	5
Valb_06_20	Valberg_2006	115	125	192	192	96	96	126	135	115	115	144	164	104	104	5
Valb_06_22	Valberg_2006	109	131	192	192	96	96	123	135	115	117	180	208	104	104	5
Valb_06_27	Valberg_2006	115	115	192	192	96	96	123	126	115	115	188	188	104	104	5
Valb_06_35	Valberg_2006	107	119	192	192	96	96	135	135	115	115	164	180	104	104	5
Valb_06_39	Valberg_2006	121	141	192	192	96	96	120	120	115	115	168	172	104	104	5
Valb_06_41	Valberg_2006	111	115	192	192	96	96	126	126	115	115	172	192	104	104	5
Valb_06_52	Valberg_2006	107	113	192	192	0	0	0	0	115	115	0	0	104	104	5
Valb_06_56	Valberg_2006	111	133	192	192	96	96	129	129	115	117	184	184	104	104	5
Valb_06_63	Valberg_2006	109	113	192	192	96	96	129	129	115	115	180	192	104	104	4
Valb_06_76	Valberg_2006	113	115	192	192	96	96	123	135	115	115	152	152	104	104	5
Valb_06_78	Valberg_2006	119	119	192	192	96	96	0	0	119	123	172	208	104	104	5
